# Supplementary material for: Parameterization and tuning of the Bay of Biscay Atlantis model v1
Source: Copernicus journal article supplement (doi:10.5194/egusphere-2023-1368), 2023-09-22
Supplement: Supplementary file 1 [file egusphere-2023-1368-supplement.pdf]

## Section S1 – Detailed description of the functional groups included in the Bay of Biscay Atlantis model.

**Table S1.** Description of functional groups composition of the Bay of Biscay Atlantis model.

| Code | Group                              | Species                                                                                                                                                                                                                                                                                                                                                                                                                                                                                                                                                                                                                                                                                                                                                                                                                                                                                                                                                                                                                                                                                                                                                                       |
|------|------------------------------------|-------------------------------------------------------------------------------------------------------------------------------------------------------------------------------------------------------------------------------------------------------------------------------------------------------------------------------------------------------------------------------------------------------------------------------------------------------------------------------------------------------------------------------------------------------------------------------------------------------------------------------------------------------------------------------------------------------------------------------------------------------------------------------------------------------------------------------------------------------------------------------------------------------------------------------------------------------------------------------------------------------------------------------------------------------------------------------------------------------------------------------------------------------------------------------|
| SBD  | Diving and pursuit divers seabirds | Razorbill ( <i>Alca torda</i> , Linnaeus 1758), Cory's shearwater ( <i>Calonectris diomedea</i> , Scopoli 1769), Atlantic puffin ( <i>Fratercula arctica</i> , Linnaeus 1758), European storm-petrel ( <i>Hydrobates pelagicus</i> , Linnaeus 1758), European shag ( <i>Phalacrocorax aristotelis</i> , Linnaeus 1761), great cormorant ( <i>Phalacrocorax carbo</i> , Linnaeus 1758), Manx shearwater ( <i>Puffinus puffinus</i> , Brunnich 1764), Balearic shearwater ( <i>Puffinus mauretanicus</i> , Lowe 1921), common murre ( <i>Uria aalge</i> , Pontoppidan 1763)                                                                                                                                                                                                                                                                                                                                                                                                                                                                                                                                                                                                     |
| SBS  | Surface feeding seabirds           | Northern fulmar ( <i>Fulmarus glacialis</i> , Linnaeus 1761), herring gull ( <i>Larus argentatus</i> , Pontoppidan 1763), yellow-legged gull ( <i>Larus cachinnans</i> , Pallas 1811), lesser black-backed gull ( <i>Larus fuscus</i> , Linnaeus 1758), great black-backed gull ( <i>Larus marinus</i> , Linnaeus 1758), yellow-legged gull ( <i>Larus michahellis</i> , J.F. Naumann 1840), common black-headed gull ( <i>Larus ridibundus</i> , Linnaeus 1766), northern gannet ( <i>Morus bassanus</i> , Linnaeus 1758), black-legged kittiwake ( <i>Rissa tridactyla</i> , Linnaeus 1758)                                                                                                                                                                                                                                                                                                                                                                                                                                                                                                                                                                                 |
| BWH  | Baleen whales                      | Minke whale ( <i>Balaenoptera acutorostrata</i> , Lacépède 1804), sei whale ( <i>Balaenoptera borealis</i> , Lesson 1828), blue whale ( <i>Balaenoptera musculus</i> , Linnaeus 1758), fin whale ( <i>Balaenoptera physalus</i> , Linnaeus 1758), humpback whale ( <i>Megaptera novaeangliae</i> , Borowski 1781), sperm whale ( <i>Physeter macrocephalus</i> , Linnaeus 1758)                                                                                                                                                                                                                                                                                                                                                                                                                                                                                                                                                                                                                                                                                                                                                                                               |
| CET  | Toothed cetaceans                  | Common dolphin ( <i>Delphinus delphis</i> , Linnaeus 1758), short-finned pilot whale ( <i>Globicephala macrorhynchus</i> , Gray 1846), long-finned pilot whale ( <i>Globicephala melas</i> , Traill 1809), Risso's dolphin ( <i>Grampus griseus</i> , Cuvier 1812), grey seal ( <i>Halichoerus grypus</i> , Fabricius 1791), Atlantic white-sided dolphin ( <i>Lagenorhynchus acutus</i> , Gray 1828), white-beaked dolphin ( <i>Lagenorhynchus albirostris</i> , Gray 1846), pygmy sperm whale ( <i>Kogia breviceps</i> , de Blainville 1838), Dwarf sperm whale ( <i>Kogia sima</i> , Owen 1866), Gervais' beaked whale ( <i>Mesoplodon europaeus</i> , Gervais 1855), True's beaked whale ( <i>Mesoplodon mirus</i> , True 1913), killer whale ( <i>Orcinus orca</i> , Linnaeus 1758), harbour seal ( <i>Phoca vitulina</i> , Linnaeus 1758), harbour porpoise ( <i>Phocoena phocoena</i> , Linnaeus 1758), false killer whale ( <i>Pseudorca crassidens</i> , Owen 1846), striped dolphin ( <i>Stenella coeruleoalba</i> , Meyen 1833), bottlenose dolphin ( <i>Tursiops truncatus</i> , Montagu 1821), Cuvier's beaked whale ( <i>Ziphius cavirostris</i> , Cuvier 1823) |
| SHB  | Demersal sharks                    | Starry smooth-hound ( <i>Mustelus asterias</i> , Cloquet 1821), smooth-hound ( <i>Mustelus mustelus</i> , Linnaeus 1758), picked dogfish ( <i>Squalus acanthias</i> , Linnaeus 1758), longnose spurdog ( <i>Squalus blainville</i> , Risso 1827), small-spotted catshark ( <i>Scyliorhinus canicula</i> , Linnaeus 1758), nursehound ( <i>Scyliorhinus stellaris</i> , Linnaeus 1758)                                                                                                                                                                                                                                                                                                                                                                                                                                                                                                                                                                                                                                                                                                                                                                                         |
| SHP  | Pelagic sharks                     | Thresher ( <i>Alopias vulpinus</i> , Bonnaterre 1788), shortfin mako ( <i>Isurus oxyrinchus</i> , Rafinesque 1810), porbeagle ( <i>Lamna nasus</i> , Bonnaterre 1788), blue shark ( <i>Prionace glauca</i> , Linnaeus 1758)                                                                                                                                                                                                                                                                                                                                                                                                                                                                                                                                                                                                                                                                                                                                                                                                                                                                                                                                                   |
| SHD  | Deep water sharks                  | Leafscale gulper shark ( <i>Centrophorus squamosus</i> , Bonnaterre 1788), Portuguese dogfish ( <i>Centroscymnus coelolepis</i> , Bocage & Capello 1864), rabbit fish ( <i>Chimaera monstrosa</i> , Linnaeus 1758), kitefin shark ( <i>Dalatias licha</i> , Bonnaterre 1788), birdbeak dogfish ( <i>Deania calcea</i> , Lowe 1839), arrowhead dogfish ( <i>Deania profundorum</i> , Smith & Radcliffe 1912), velvet belly ( <i>Etmopterus spinax</i> , Linnaeus 1758), tope shark ( <i>Galeorhinus galeus</i> , Linnaeus 1758), Atlantic sawtail catshark ( <i>Galeus atlanticus</i> , Vaillant 1888), blackmouth catshark ( <i>Galeus melastomus</i> , Rafinesque 1810), bluntnose sixgill shark ( <i>Hexanchus griseus</i> , Bonnaterre 1788), knifetooth dogfish ( <i>Scymnodon ringens</i> , Bocage & Capello 1864)                                                                                                                                                                                                                                                                                                                                                       |

Table S1 (continued)

| Code | Group                      | Species                                                                                                                                                                                                                                                                                                                                                                                                                                                                                                                                                                                                                                                                                                                                                                                                                                                                                                                                                                                                      |
|------|----------------------------|--------------------------------------------------------------------------------------------------------------------------------------------------------------------------------------------------------------------------------------------------------------------------------------------------------------------------------------------------------------------------------------------------------------------------------------------------------------------------------------------------------------------------------------------------------------------------------------------------------------------------------------------------------------------------------------------------------------------------------------------------------------------------------------------------------------------------------------------------------------------------------------------------------------------------------------------------------------------------------------------------------------|
| SSK  | Skates and rays            | Common stingray ( <i>Dasyatis pastinaca</i> , Linnaeus 1758), blue skate ( <i>Dipturus batis</i> , Linnaeus 1758), sandy ray ( <i>Leucoraja circularis</i> , Couch 1838), shagreen ray ( <i>Leucoraja fullonica</i> , Linnaeus 1758), cuckoo ray ( <i>Leucoraja naevus</i> , Müller & Henle 1841), common eagle ray ( <i>Myliobatis aquila</i> , Linnaeus 1758), thornback ray ( <i>Raja clavata</i> , Linnaeus 1758), small-eyed ray ( <i>Raja microocellata</i> , Montagu 1818), spotted ray ( <i>Raja montagui</i> , Fowler 1910)                                                                                                                                                                                                                                                                                                                                                                                                                                                                         |
| BFT  | Bluefin tuna               | Atlantic bluefin tuna ( <i>Thunnus thynnus</i> , Linnaeus 1758)                                                                                                                                                                                                                                                                                                                                                                                                                                                                                                                                                                                                                                                                                                                                                                                                                                                                                                                                              |
| ALB  | Albacore                   | Albacore ( <i>Thunnus alalunga</i> , Bonnaterre 1788)                                                                                                                                                                                                                                                                                                                                                                                                                                                                                                                                                                                                                                                                                                                                                                                                                                                                                                                                                        |
| OPE  | Other large pelagic fishes | Garfish ( <i>Belone belone</i> , Linnaeus 1761), Atlantis pomfret ( <i>Brama brama</i> , Bonnaterre 1788), skipjack tuna ( <i>Katsuwonus pelamis</i> , Linnaeus 1758), bluefish ( <i>Pomatomus saltatrix</i> , Linnaeus 1766), Atlantic bonito ( <i>Sarda sarda</i> , Bloch 1793), Atlantic saury ( <i>Scomberesox saurus</i> , Walbaum 1792), bigeye tuna ( <i>Thunnus obesus</i> , Lowe 1839)                                                                                                                                                                                                                                                                                                                                                                                                                                                                                                                                                                                                              |
| MAC  | Mackerel                   | Atlantic chub mackerel ( <i>Scomber colias</i> , Gmelin 1789), Atlantic mackerel ( <i>Scomber scombrus</i> , Linnaeus 1758)                                                                                                                                                                                                                                                                                                                                                                                                                                                                                                                                                                                                                                                                                                                                                                                                                                                                                  |
| HOM  | Horse mackerel             | Mediterranean horse mackerel ( <i>Trachurus mediterraneus</i> , Steindachner 1868), Atlantic horse mackerel ( <i>Trachurus trachurus</i> , Linnaeus 1758)                                                                                                                                                                                                                                                                                                                                                                                                                                                                                                                                                                                                                                                                                                                                                                                                                                                    |
| PIL  | Sardine                    | European pilchard (=Sardine) ( <i>Sardina pilchardus</i> , Walbaum 1792)                                                                                                                                                                                                                                                                                                                                                                                                                                                                                                                                                                                                                                                                                                                                                                                                                                                                                                                                     |
| ANE  | Anchovy                    | European anchovy ( <i>Engraulis encrasicolus</i> , Linnaeus 1758)                                                                                                                                                                                                                                                                                                                                                                                                                                                                                                                                                                                                                                                                                                                                                                                                                                                                                                                                            |
| OPL  | Other planktivorous fishes | Allis shad ( <i>Alosa alosa</i> , Linnaeus 1758), twaite shad ( <i>Alosa fallax</i> , Lacépède 1803), argentine ( <i>Argentina sphyraena</i> , Linnaeus 1758), bogue ( <i>Boops boops</i> , Linnaeus 1758), boarfish ( <i>Capros aper</i> , Linnaeus 1758), Atlantic herring ( <i>Clupea harengus</i> , Linnaeus 1758), silvery pout ( <i>Gadiculus argenteus</i> , Guichenot 1850), longspine snipefish ( <i>Macroramphosus scolopax</i> , Linnaeus 1758), European smelt ( <i>Osmerus eperlanus</i> , Linnaeus 1758), Atlantic saury ( <i>Scomberesox saurus</i> , Walbaum 1792), European sprat ( <i>Sprattus sprattus</i> , Linnaeus 1758)                                                                                                                                                                                                                                                                                                                                                               |
| FMP  | Mesopelagic fishes         | Baird's slickhead ( <i>Alepocephalus bairdii</i> , Goode & Bean 1879), spotted barracudina ( <i>Arctozenus risso</i> , Bonaparte 1840), half-naked hatchetfish ( <i>Argyropelecus hemigymnus</i> , Cocco 1829), glacier lantern fish ( <i>Benthoosema glaciale</i> , Reinhardt 1837), Madeira lantern fish ( <i>Ceratoscopelus maderensis</i> , Lowe 1839), shortnose greeneye ( <i>Chlorophthalmus agassizi</i> , Bonaparte 1840), jewel lanternfish ( <i>Lampanyctus crocodilus</i> , Risso 1810), silvery lightfish ( <i>Maurollicus muelleri</i> , Gmelin 1789), spotted lanternfish ( <i>Myctophum punctatum</i> , Rafinesque 1810)                                                                                                                                                                                                                                                                                                                                                                     |
| ANF  | Anglerfish                 | Blackbellied angler ( <i>Lophius budegassa</i> , Spinola 1807), angler (=monk) ( <i>Lophius piscatorius</i> , Linnaeus 1758)                                                                                                                                                                                                                                                                                                                                                                                                                                                                                                                                                                                                                                                                                                                                                                                                                                                                                 |
| BSS  | Seabass                    | European seabass ( <i>Dicentrarchus labrax</i> , Linnaeus 1758)                                                                                                                                                                                                                                                                                                                                                                                                                                                                                                                                                                                                                                                                                                                                                                                                                                                                                                                                              |
| WHB  | Blue whiting               | Blue whiting (=Poutassou) ( <i>Micromesistius poutassou</i> , Risso 1827)                                                                                                                                                                                                                                                                                                                                                                                                                                                                                                                                                                                                                                                                                                                                                                                                                                                                                                                                    |
| HKE  | Hake                       | European hake ( <i>Merluccius merluccius</i> , Linnaeus 1758)                                                                                                                                                                                                                                                                                                                                                                                                                                                                                                                                                                                                                                                                                                                                                                                                                                                                                                                                                |
| COD  | Cods                       | Norway pout ( <i>Trisopterus esmarkii</i> , Nilsson 1855), pouting (=bib) ( <i>Trisopterus luscus</i> , Linnaeus 1758), poor cod ( <i>Trisopterus minutus</i> , Linnaeus 1758)                                                                                                                                                                                                                                                                                                                                                                                                                                                                                                                                                                                                                                                                                                                                                                                                                               |
| MEG  | Megrim                     | Four-spot megrim ( <i>Lepidorhombus boscii</i> , Risso 1810), megrim ( <i>Lepidorhombus whiffiagonis</i> , Walbaum 1792)                                                                                                                                                                                                                                                                                                                                                                                                                                                                                                                                                                                                                                                                                                                                                                                                                                                                                     |
| SOL  | Common sole                | Common sole ( <i>Solea solea</i> , Linnaeus 1758)                                                                                                                                                                                                                                                                                                                                                                                                                                                                                                                                                                                                                                                                                                                                                                                                                                                                                                                                                            |
| FFL  | Flatfishes                 | Imperial scaldfish ( <i>Arnoglossus imperialis</i> , Rafinesque 1810), Mediterranean scaldfish ( <i>Arnoglossus laterna</i> , Walbaum 1792), Thor's scaldfish ( <i>Arnoglossus thori</i> , Kyle 1913), deep water sole ( <i>Bathysolea profundicola</i> , Vaillant 1888), solenette ( <i>Buglossidium luteum</i> , Risso 1810), spotted flounder ( <i>Citharus linguatula</i> , Linnaeus 1758), wedge sole ( <i>Dicologlossa cuneata</i> , Moreau 1881), witch flounder ( <i>Glyptocephalus cynoglossus</i> , Linnaeus 1758), common dab ( <i>Limanda limanda</i> , Linnaeus 1758), thickback sole ( <i>Microchirus variegatus</i> , Donovan 1808), lemon sole ( <i>Microstomus kitt</i> , Walbaum 1792), sand sole ( <i>Pegusa lascaris</i> , Ben-Tuvia 1990), European flounder ( <i>Platichthys flesus</i> , Linnaeus 1758), European plaice ( <i>Pleuronectes platessa</i> , Linnaeus 1758), turbot ( <i>Scophthalmus maximus</i> , Linnaeus 1758), brill ( <i>Scophthalmus rhombus</i> , Linnaeus 1758) |
| MUL  | Mulletts                   | Red mullet ( <i>Mullus barbatus</i> , Linnaeus 1758), surmullet ( <i>Mullus surmuletus</i> , Linnaeus 1758)                                                                                                                                                                                                                                                                                                                                                                                                                                                                                                                                                                                                                                                                                                                                                                                                                                                                                                  |

TablesS1 (continued)

| Code | Group                  | Species                                                                                                                                                                                                                                                                                                                                                                                                                                                                                                                                                                                                                                                                                                                                                                                                                                                                                                                                                                                                                                                                                                                                                                                                                                                                                                                                                                                                                                                                                                                                                                                                                                                                                                                                                                                                                                                                                                                                                                                                                                                                                                                                                                                                                                                                                 |
|------|------------------------|-----------------------------------------------------------------------------------------------------------------------------------------------------------------------------------------------------------------------------------------------------------------------------------------------------------------------------------------------------------------------------------------------------------------------------------------------------------------------------------------------------------------------------------------------------------------------------------------------------------------------------------------------------------------------------------------------------------------------------------------------------------------------------------------------------------------------------------------------------------------------------------------------------------------------------------------------------------------------------------------------------------------------------------------------------------------------------------------------------------------------------------------------------------------------------------------------------------------------------------------------------------------------------------------------------------------------------------------------------------------------------------------------------------------------------------------------------------------------------------------------------------------------------------------------------------------------------------------------------------------------------------------------------------------------------------------------------------------------------------------------------------------------------------------------------------------------------------------------------------------------------------------------------------------------------------------------------------------------------------------------------------------------------------------------------------------------------------------------------------------------------------------------------------------------------------------------------------------------------------------------------------------------------------------|
| FDL  | Large demersal fishes  | Meagre ( <i>Argyrosomus regius</i> , Asso 1801), European conger ( <i>Conger conger</i> , Linnaeus 1758), Atlantic cod ( <i>Gadus morhua</i> , Linnaeus 1758), haddock ( <i>Melanogrammus aeglefinus</i> , Linnaeus 1758), blue ling ( <i>Molva dypterygia</i> , Pennant 1784), Spanish ling ( <i>Molva macrophthalma</i> , Rafinesque 1810), ling ( <i>Molva molva</i> , Linnaeus 1758), forkbeard ( <i>Phycis phycis</i> , Linnaeus 1766), pollack ( <i>Pollachius pollachius</i> , Linnaeus 1758), saithe (=pollock) ( <i>Pollachius virens</i> , Linnaeus 1758), John dory ( <i>Zeus faber</i> , Linnaeus 1758)                                                                                                                                                                                                                                                                                                                                                                                                                                                                                                                                                                                                                                                                                                                                                                                                                                                                                                                                                                                                                                                                                                                                                                                                                                                                                                                                                                                                                                                                                                                                                                                                                                                                     |
| FDM  | Medium demersal fishes | Tub gurnard ( <i>Chelidonichthys lucerna</i> , Linnaeus 1758), blackbelly rosefish ( <i>Helicolenus dactylopterus</i> , Delaroche 1809), sand steenbras ( <i>Lithognathus mormyrus</i> , Linnaeus 1758), whiting ( <i>Merlangius merlangus</i> , Linnaeus 1758), blackspot seabream ( <i>Pagellus bogaraveo</i> , Brünnich 1768), red porgy ( <i>Pagrus pagrus</i> , Linnaeus 1758), greater forkbeard ( <i>Phycis blennoides</i> , Brünnich 1768), red scorpionfish ( <i>Scorpaena scrofa</i> , Linnaeus 1758), gilthead seabream ( <i>Sparus aurata</i> , Linnaeus 1758)                                                                                                                                                                                                                                                                                                                                                                                                                                                                                                                                                                                                                                                                                                                                                                                                                                                                                                                                                                                                                                                                                                                                                                                                                                                                                                                                                                                                                                                                                                                                                                                                                                                                                                              |
| FDS  | Small demersal fishes  | Scale-rayed wrasse ( <i>Acantholabrus palloni</i> , Valenciennes 1839), small sandeel ( <i>Ammodytes tobianus</i> , Linnaeus 1758), transparent goby ( <i>Aphia minuta</i> , Risso 1810), butterfly blenny ( <i>Blennius ocellaris</i> , Linnaeus 1758), dragonet ( <i>Callionymus lyra</i> , Linnaeus 1758), spotted dragonet ( <i>Callionymus maculatus</i> , Rafinesque 1810), reticulated dragonet ( <i>Callionymus reticulatus</i> , Valenciennes 1837), red gurnard ( <i>Chelidonichthys cuculus</i> , Linnaeus 1758), streaked gurnard ( <i>Chelidonichthys lastoviza</i> , Bonnaterre 1788), longfin gurnard ( <i>Chelidonichthys obscurus</i> , Bloch & Schneider 1801), thicklip grey mullet ( <i>Chelon labrosus</i> , Risso 1827), goldsinny-wrasse ( <i>Ctenolabrus rupestris</i> , Linnaeus 1758), four-spotted goby ( <i>Deltentosteus quadrimaculatus</i> , Valenciennes 1837), white seabream ( <i>Diplodus sargus</i> , Valenciennes 1830), common two-banded seabream ( <i>Diplodus vulgaris</i> , Geoffroy St. Hilaire 1817), grey gurnard ( <i>Eutrigla gurnardus</i> , Linnaeus 1758), bigeye rockling ( <i>Gaidropsarus macrophthalmus</i> , Günther 1867), three-bearded rockling ( <i>Gaidropsarus vulgaris</i> , Cloquet 1824), gobies nei ( <i>Gobiidae</i> ), cuckoo wrasse ( <i>Labrus mixtus</i> , Linnaeus 1758), spiny gurnard ( <i>Lepidotrigla dieuzeidei</i> , Blanc & Hureau 1973), Fries's goby ( <i>Lesueurigobius friesii</i> , Malm 1874), thinlip grey mullet ( <i>Liza ramada</i> , Risso 1810), softhead grenadier ( <i>Malacocephalus laevis</i> , Lowe 1843), common Atlantic grenadier ( <i>Nezumia aequalis</i> , Günther 1878), snake blenny ( <i>Ophidion barbatum</i> , Linnaeus 1758), axillary seabream ( <i>Pagellus acarne</i> , Risso 1827), common pandora ( <i>Pagellus erythrinus</i> , Linnaeus 1758), sand goby ( <i>Pomatoschistus minutus</i> , Pallas 1770), painted goby ( <i>Pomatoschistus pictus</i> , Malm 1865), cadenat's rockfish ( <i>Scorpaena loppei</i> , Cadenat 1943), comber ( <i>Serranus cabrilla</i> , Linnaeus 1758), black seabream ( <i>Spondyliosoma cantharus</i> , Linnaeus 1758), greater weever ( <i>Trachinus draco</i> , Linnaeus 1758), piper gurnard ( <i>Trigla lyra</i> , Linnaeus 1758) |
| FSD  | Deep sea fishes        | Alfonsino ( <i>Beryx decadactylus</i> , Cuvier 1829), red bandfish ( <i>Cepola macrophthalma</i> , Linnaeus 1758), hollowsnout grenadier ( <i>Coelorinchus caelorhincus</i> , Risso 1810), Mediterranean slimehead ( <i>Hoplostethus mediterraneus</i> , Cuvier 1829), Mediterranean codling ( <i>Lepidion lepidion</i> , Risso 1810), common mora ( <i>Mora moro</i> , Risso 1810), <i>Notacanthus bonaparte</i> , Kaup's arrowtooth eel ( <i>Synaphobranchus kaupii</i> , Johnson 1862), roughsnout grenadier ( <i>Trachyrincus scabrus</i> , Rafinesque 1810)                                                                                                                                                                                                                                                                                                                                                                                                                                                                                                                                                                                                                                                                                                                                                                                                                                                                                                                                                                                                                                                                                                                                                                                                                                                                                                                                                                                                                                                                                                                                                                                                                                                                                                                        |
| CBE  | Benthic cephalopods    | Globose octopus ( <i>Bathypolypus sponsalis</i> , Fischer and Fischer 1892), horned octopus ( <i>Eledone cirrhosa</i> , Lamarck 1798), spider octopus ( <i>Octopus salutii</i> , Verany 1837), common octopus ( <i>Octopus vulgaris</i> , Cuvier 1797), lentic Bay of Biscaytail squid ( <i>Rondeletiola minor</i> , Naef 1912), elegant cuttlefish ( <i>Sepia elegans</i> , Blainville 1827), common cuttlefish ( <i>Sepia officinalis</i> , Linnaeus 1758), pink cuttlefish ( <i>Sepia orbignyana</i> , Férussac 1826), common Bay of Biscaytail squid ( <i>Sepietta oweniana</i> , d'Orbigny 1839)                                                                                                                                                                                                                                                                                                                                                                                                                                                                                                                                                                                                                                                                                                                                                                                                                                                                                                                                                                                                                                                                                                                                                                                                                                                                                                                                                                                                                                                                                                                                                                                                                                                                                   |

Table S1 (continued)

| Code | Group                         | Species                                                                                                                                                                                                                                                                                                                                                                                                                                                                                                                                                                                                                                                                                                                                                                                                                                                                                                                                                                                                                                                                                                                                                                                                                                                                                                                                                                                                                                                                                                                                                                                                                                                                 |
|------|-------------------------------|-------------------------------------------------------------------------------------------------------------------------------------------------------------------------------------------------------------------------------------------------------------------------------------------------------------------------------------------------------------------------------------------------------------------------------------------------------------------------------------------------------------------------------------------------------------------------------------------------------------------------------------------------------------------------------------------------------------------------------------------------------------------------------------------------------------------------------------------------------------------------------------------------------------------------------------------------------------------------------------------------------------------------------------------------------------------------------------------------------------------------------------------------------------------------------------------------------------------------------------------------------------------------------------------------------------------------------------------------------------------------------------------------------------------------------------------------------------------------------------------------------------------------------------------------------------------------------------------------------------------------------------------------------------------------|
| CBP  | Squids                        | Midsized squid ( <i>Alloteuthis media</i> , Linnaeus 1758), European common squid ( <i>Alloteuthis subulata</i> , Lamarck 1798), broadtail shortfin squid ( <i>Illex coindetii</i> , Verany 1839), Northern shortfin squid ( <i>Illex illecebrosus</i> , Lesueur 1821), veined squid ( <i>Loligo forbesi</i> , Steenstrup 1856), European squid ( <i>Loligo vulgaris</i> , Lamarck 1798), European flying squid ( <i>Todarodes sagittatus</i> , Lamarck 1798), lesser flying squid ( <i>Todaropsis eblanae</i> , Ball 1841)                                                                                                                                                                                                                                                                                                                                                                                                                                                                                                                                                                                                                                                                                                                                                                                                                                                                                                                                                                                                                                                                                                                                             |
| NEP  | Norway lobster                | Norway lobster ( <i>Nephrops norvegicus</i> , Linnaeus 1758)                                                                                                                                                                                                                                                                                                                                                                                                                                                                                                                                                                                                                                                                                                                                                                                                                                                                                                                                                                                                                                                                                                                                                                                                                                                                                                                                                                                                                                                                                                                                                                                                            |
| CRP  | Pelagic crab                  | Henslow's swimming crab ( <i>Polybius henslowii</i> , Leach 1820)                                                                                                                                                                                                                                                                                                                                                                                                                                                                                                                                                                                                                                                                                                                                                                                                                                                                                                                                                                                                                                                                                                                                                                                                                                                                                                                                                                                                                                                                                                                                                                                                       |
| SHR  | Zooplankton feeding shrimps   | <i>Acantheephyra pelagica</i> (Risso 1816), <i>Acantheephyra purpurea</i> (A. Milne-Edwards 1881), green shrimp ( <i>Chlorotocus crassicornis</i> , Costa 1871), <i>Eusergestes arcticus</i> (Kroyer 1855), <i>Gnathophausia zoea</i> (Willemoes-Suhm 1873), pink glass shrimp ( <i>Pasiphaea multidentata</i> , Esmark 1866), white glass shrimp ( <i>Pasiphaea sivado</i> , Risso 1816), lesser striped shrimp ( <i>Plesionika acanthonotus</i> , S.I. Smith 1882), arrow shrimp ( <i>Plesionika heterocarpus</i> , Costa 1871), golden shrimp ( <i>Plesionika martia</i> , A. Milne Edwards 1883), <i>Sergia robusta</i> (Smith 1882)                                                                                                                                                                                                                                                                                                                                                                                                                                                                                                                                                                                                                                                                                                                                                                                                                                                                                                                                                                                                                                |
| DFB  | Benthos-feeders decapods      | Red snapping shrimp ( <i>Alpheus glaber</i> , Olivi 1792), blue and red shrimp ( <i>Aristeus antennatus</i> , Risso 1816), circular crab ( <i>Atelecyclus rotundatus</i> , Olivi 1792), <i>Bathynectes maravigna</i> (Prestandrea 1839), edible crab ( <i>Cancer pagurus</i> , Linnaeus 1758), common shrimp ( <i>Crangon crangon</i> , Linnaeus 1758), whip shrimp ( <i>Dichelopandalus bonnieri</i> , Caullery 1896), <i>Galathea dispersa</i> (Bate 1859), <i>Geryon trispinosus</i> (Herbst 1803), European lobster ( <i>Homarus gammarus</i> , Linnaeus 1758), scorpion spider crab ( <i>Inachus dorsettensis</i> , Pennant 1777), blue-leg swimcrab ( <i>Liocarcinus depurator</i> , Linnaeus 1758), knobby swimcrab ( <i>Macropipus tuberculatus</i> , Roux 1830), <i>Macropodia longipes</i> (Milne-Edwards & Bouvier 1899), spinous spider crab ( <i>Maja squinado</i> , Herbst 1788), common prawn ( <i>Palaemon serratus</i> , Pennant 1777), pink spiny lobster ( <i>Palinurus mauritanicus</i> , Gruvel 1911), <i>Pandalina brevirostris</i> (Rathke 1843), deep-water rose shrimp ( <i>Parapenaeus longirostris</i> , Lucas 1846), megalops shrimp ( <i>Penaeopsis serrata</i> , Bate 1888), caramote prawn ( <i>Penaeus kerathurus</i> , Forsskål 1775), <i>Philocheras echinulatus</i> (M. Sars 1861), <i>Polycheles typhlops</i> (Heller 1862), Norwegian shrimp ( <i>Pontophilus norvegicus</i> , M. Sars 1861), spiny shrimp ( <i>Pontophilus spinosus</i> , Leach 1815), processa shrimp ( <i>Processa canaliculata</i> , Leach 1815), <i>Rissoides desmarestii</i> (Risso 1816), Atlantic mud shrimp ( <i>Solenocera membranacea</i> , Risso 1816) |
| DFD  | Detritus-feeders decapods     | <i>Anapagurus laevis</i> (Bell 1845), angular crab ( <i>Goneplax rhomboides</i> , Linnaeus 1758), <i>Munida intermedia</i> (Milne-Edwards & Bouvier 1899), <i>Munida iris</i> (Milne-Edwards 1880), <i>Munida sarsi</i> (Huus 1935), <i>Munida tenuimana</i> (Sars 1871), American smooth flounder ( <i>Pagurus alatus</i> , Fabricius 1775), common hermit crab ( <i>Pagurus bernhardus</i> , Linnaeus 1758), <i>Pagurus excavatus</i> (Herbst 1791), Prideaux's hermit crab ( <i>Pagurus prideaux</i> , Leach 1815), delta prawn ( <i>Palaemon longirostris</i> , H. Milne Edwards 1837), whiteleg shrimp ( <i>Penaeus vannamei</i> , Boone 1931)                                                                                                                                                                                                                                                                                                                                                                                                                                                                                                                                                                                                                                                                                                                                                                                                                                                                                                                                                                                                                     |
| BIV  | Bivalves                      |                                                                                                                                                                                                                                                                                                                                                                                                                                                                                                                                                                                                                                                                                                                                                                                                                                                                                                                                                                                                                                                                                                                                                                                                                                                                                                                                                                                                                                                                                                                                                                                                                                                                         |
| POL  | Polychaetes                   |                                                                                                                                                                                                                                                                                                                                                                                                                                                                                                                                                                                                                                                                                                                                                                                                                                                                                                                                                                                                                                                                                                                                                                                                                                                                                                                                                                                                                                                                                                                                                                                                                                                                         |
| SB   | Suprabenthos                  | Mysids, isopods, amphipods, cumaceans and copepods                                                                                                                                                                                                                                                                                                                                                                                                                                                                                                                                                                                                                                                                                                                                                                                                                                                                                                                                                                                                                                                                                                                                                                                                                                                                                                                                                                                                                                                                                                                                                                                                                      |
| ECH  | Echinoderms                   |                                                                                                                                                                                                                                                                                                                                                                                                                                                                                                                                                                                                                                                                                                                                                                                                                                                                                                                                                                                                                                                                                                                                                                                                                                                                                                                                                                                                                                                                                                                                                                                                                                                                         |
| INV  | Other invertebrates           | Gastropods, cnidarians and sponges                                                                                                                                                                                                                                                                                                                                                                                                                                                                                                                                                                                                                                                                                                                                                                                                                                                                                                                                                                                                                                                                                                                                                                                                                                                                                                                                                                                                                                                                                                                                                                                                                                      |
| ZG   | Gelatinous zooplankton        | Cubozoa, hydrozoa, scyphozoa and tunicata                                                                                                                                                                                                                                                                                                                                                                                                                                                                                                                                                                                                                                                                                                                                                                                                                                                                                                                                                                                                                                                                                                                                                                                                                                                                                                                                                                                                                                                                                                                                                                                                                               |
| ZL   | Macrozooplankton (> 2000 µm)  |                                                                                                                                                                                                                                                                                                                                                                                                                                                                                                                                                                                                                                                                                                                                                                                                                                                                                                                                                                                                                                                                                                                                                                                                                                                                                                                                                                                                                                                                                                                                                                                                                                                                         |
| ZM   | Mesozooplankton (200-2000 µm) |                                                                                                                                                                                                                                                                                                                                                                                                                                                                                                                                                                                                                                                                                                                                                                                                                                                                                                                                                                                                                                                                                                                                                                                                                                                                                                                                                                                                                                                                                                                                                                                                                                                                         |
| ZS   | Microzooplankton (< 200 µm)   |                                                                                                                                                                                                                                                                                                                                                                                                                                                                                                                                                                                                                                                                                                                                                                                                                                                                                                                                                                                                                                                                                                                                                                                                                                                                                                                                                                                                                                                                                                                                                                                                                                                                         |
| PP   | Benthic primary producers     | Benthic macrophytes and microphytobenthos                                                                                                                                                                                                                                                                                                                                                                                                                                                                                                                                                                                                                                                                                                                                                                                                                                                                                                                                                                                                                                                                                                                                                                                                                                                                                                                                                                                                                                                                                                                                                                                                                               |
| PL   | Large phytoplankton (> 20 µm) |                                                                                                                                                                                                                                                                                                                                                                                                                                                                                                                                                                                                                                                                                                                                                                                                                                                                                                                                                                                                                                                                                                                                                                                                                                                                                                                                                                                                                                                                                                                                                                                                                                                                         |
| PS   | Small phytoplankton (< 20µm)  |                                                                                                                                                                                                                                                                                                                                                                                                                                                                                                                                                                                                                                                                                                                                                                                                                                                                                                                                                                                                                                                                                                                                                                                                                                                                                                                                                                                                                                                                                                                                                                                                                                                                         |

Table S1 (continued)

| Code | Group               | Species |
|------|---------------------|---------|
| PB   | Pelagic bacteria    |         |
| BB   | Sediment bacteria   |         |
| DL   | Labile detritus     |         |
| DR   | Refractory detritus |         |
| DC   | Carrion             |         |

10

15

## **Carrion**

20 The model was initialized with a biomass of  $0.91 \text{ t km}^{-2}$  (Corrales et al., 2022).

We assumed that bacteria groups are distributed throughout the whole water column of the model. The vertical and horizontal distribution was based on the proportion of each cell from the total area. Detailed vertical and horizontal distribution can be found in Section S3, Table S6 and Fig. S1, respectively.

## 25 **Detritus**

Labile and refractory detritus have equal initialization estimates. Each of the detritus group was initialized with a biomass of  $86.81 \text{ t km}^{-2}$  (Corrales et al., 2022).

We assumed that bacteria groups are distributed throughout the whole water column of the model. The vertical and horizontal distribution was based on the proportion of each cell from the total area.  
30 Detailed vertical and horizontal distribution can be found in Section S3, Table S6 and Fig. S1, respectively.

## **Bacteria**

Pelagic and benthic bacteria have equal initialization estimates. As a rough estimate for the biomass of each of the bacteria group, a value of  $5.50 \cdot 10^{+5} \text{ cells ml}^{-1}$  from ICES (2012) and the conversion factor  
35 from Fukuda et al. (1998) was used to get the initial  $6.6 \cdot 10^{-5} \text{ mg ml}^{-1}$ .

The growth rate (mgN per day) and mortality rate (per day) were assumed to be those set in the SE-Australian Atlantis model (Fulton et al., 2004).

We assumed that bacteria groups are distributed throughout the whole water column of the model. The vertical and horizontal distribution was based on the proportion of each cell from the total area.  
40 Detailed vertical and horizontal distribution can be found in Section S3, Table S6 and Fig. S1, respectively.

## **Phytoplankton**

The size categories for large and small phytoplankton comes from Marquis et al. (2007):  $> 20 \mu\text{m}$  and  $< 20\mu\text{m}$ , respectively.

45 Estimates of phytoplankton biomass were collected from E.U. Copernicus Marine Service Information for the Iberia-Biscay-Ireland (IBI) area (Aznar et al., 2016). These estimates were based on satellite Chl-a data and conversion factors from Jorgensen et al. (1991) and Dalsgaard et al. (1997) were used to convert to  $\text{t km}^{-2}$ . Large phytoplankton was initialized with a biomass of  $4.22 \text{ t km}^{-2}$  and small phytoplankton with a biomass of  $7.42 \text{ t km}^{-2}$ .

50 The growth rate (mgN per day) and mortality rate (per day) were assumed to be those set in the SE-Australian Atlantis model (Fulton et al., 2004).

The phytoplankton is most common in the upper 45 m (Liria et al., 2016), but a maximum depth of 100 m was set (pers. comm. Xavier Corrales). Detailed vertical distribution can be found in Section S3, Table S6. The horizontal distribution was characterized weighing each of the boxes from the total area of  
55 the Bay of Biscay. Detailed horizontal distribution can be found in Section S3, Fig. S1.

### **Benthic primary producers**

The benthic primary producers group includes benthic macrophytes and microphytobenthos. The model was initialized with a biomass of  $0.49 \text{ t km}^{-2}$  (Guénette and Gascuel, 2009).

60 The growth rate (mgN per day) and mortality rate (per day) were assumed to be those set in the SE-Australian Atlantis model (Fulton et al., 2004).

Benthic primary producers are mostly common in the first 0-50 m (pers. comm. Xavier Corrales). Detailed vertical distribution can be found in Section S3, Table S6. The horizontal distribution was characterized weighing each of the boxes from the total area of the Bay of Biscay. Detailed horizontal distribution can be found in Section S3, Fig. S1.

### **65 General zooplankton**

The size categories for macrozooplankton, mesozooplankton and microzooplankton are the standard sizes used in the literature:  $> 2000 \mu\text{m}$ ,  $200\text{-}2000 \mu\text{m}$  and  $< 200 \mu\text{m}$ , respectively (Poulet et al., 1996).

70 The zooplankton can be found from the surface up to 2000 m (Albaina and Irigoien, 2007). Detailed vertical distribution can be found in Section S3, Table S6. The horizontal distribution was characterized weighing each of the boxes from the total area of the Bay of Biscay. Detailed horizontal distribution can be found in Section S3, Fig. S1.

## **Microzooplankton**

The model was initialized with a biomass of  $5.5 \text{ t km}^{-2}$  (Corrales et al., 2022).

75 The growth rate (mgN per day) and mortality rate (per day) were assumed to be those set in the SE-Australian Atlantis model (Fulton et al., 2004).

Their diet consists mainly of the two phytoplankton groups and detritus (Calbet, 2008; Sherr and Sherr, 2007). Detailed diet matrix can be found in Section S4, Table S7.

## **Mesozooplankton**

80 The model was initialized with a biomass of  $7.7 \text{ t km}^{-2}$  (Corrales et al., 2022).

The growth rate (mgN per day) and mortality rate (per day) were assumed to be those set in the SE-Australian Atlantis model (Fulton et al., 2004).

The mesozooplankton feeds mainly in microzooplankton, large phytoplankton and small phytoplankton (Calbet, 2001; Calbet et al., 2002; Calbet and Saiz, 2005). Detailed diet matrix can be  
85 found in Section S4, Table S7.

## **Macrozooplankton**

The model was initialized with a biomass of  $5.1 \text{ t km}^{-2}$  (Corrales et al., 2022) .

The growth rate (mgN per day) for this group was assumed to be this set in the SE-Australian Atlantis model (Fulton et al., 2004).

90 The mortality rate was set very low, 0.000001 per day (Hansen et al., 2016).

Their diet consists of gelatinous zooplankton, macro- and meso-zooplankton, large and small phytoplankton and detritus (Båmstedt and Karlson, 1998; Cleary et al., 2012; Dalpadado et al., 2008). Detailed diet matrix can be found in Section S4, Table S7.

## **Gelatinous zooplankton**

95 The gelatinous zooplankton group is composed by cubozoas, hydrozoas, scyphozoas and tunicatas. It was initialized with a biomass of  $0.81 \text{ t km}^{-2}$  (Lamb et al., 2019; Pauly et al., 2008).



The growth rate (mgN per day) and mortality rate (per day) were assumed to be those set in the SE-Australian Atlantis model (Fulton et al., 2004).

The maximum depth of the group was assumed 2000 m (pers. comm. Xavier Corrales). Detailed vertical distribution can be found in Section S3, Table S6. The horizontal distribution was characterized weighing each of the boxes from the total area of the Bay of Biscay. Detailed horizontal distribution can be found in Section S3, Fig. S1.

Their diet consist of gelatinous zooplankton, macrozooplankton, mesozooplankton, microzooplankton, large phytoplankton, small phytoplankton and detritus, being mesozooplankton the dominant prey (Granhag and Hosia, 2015; Hansson et al., 2005; Lilley et al., 2009; Martinussen and Båmstedt, 1995). Detailed diet matrix can be found in Section S4, Table S7.

### **Other invertebrates**

The other invertebrates group is composed by gastropods, cnidarians and sponges. This group was initialized with a biomass of  $7.23 \text{ t km}^{-2}$  (Blanchet et al., 2005; Le Loc'h et al., 2008; Serrano et al., 2006).

The growth rate (mgN per day) and mortality rate (per day) were assumed to be those set in the SE-Australian Atlantis model (Fulton et al., 2004).

Based on the information of depth range gathered in Palomares and Pauly (2021) for the invertebrate species included in DEMERSALES and EVHOE bottom trawl surveys (ICES, 2017d), a depth range of 0-2000 m was assumed for the group. Detailed vertical distribution can be found in Section S3, Table S6. The horizontal distribution was characterized taking into account the information gathered from DEMERSALES and EVHOE bottom trawl surveys (ICES, 2017d). Detailed horizontal distribution can be found in Section S3, Fig. S1.

The 85% of the diet corresponds to detritus, the remaining 15% being made up of suprabenthos, the zooplankton groups, benthic primary producers, large and small phytoplankton, and discards. (Bergquist, 2001; Geiger, 2006; Lewis, 1982). Detailed diet matrix can be found in Section S4, Table S7.

### **Echinoderms**

The echinoderms group was initialized with a biomass of  $1.12 \text{ t km}^{-2}$  (Le Loc'h et al., 2008; Lourido et al., 2014; Serrano et al., 2006).

The growth rate (mgN per day) and mortality rate (per day) were assumed to be those set in the SE-  
125 Australian Atlantis model (Fulton et al., 2004).

Based on the information of depth range gathered in Palomares and Pauly (2021) for the echinoderms species included in DEMERSALES and EVHOE bottom trawl surveys (ICES, 2017d), a depth range of 0-1500 m was assumed for the group. Detailed vertical distribution can be found in Section S3, Table S6. The horizontal distribution was characterized taking into account the information gathered from  
130 DEMERSALES and EVHOE bottom trawl surveys (ICES, 2017d). Detailed horizontal distribution can be found in Section S3, Fig. S1.

The diet consists of bivalves, polychaetes, other invertebrates, benthic primary producers, detritus and discards, being detritus the dominant prey (90% of the total) (Coulon and Jangoux, 1993; Juan et al., 2007; Rodriguez, 1972). Detailed diet matrix can be found in Section S4, Table S7.

### 135 **Suprabenthos**

The suprabenthos group is composed by mysids, isopods, amphipods, cumaceans and copepods. This group was initialized with a biomass of 2.51 t km<sup>-2</sup> (Blanchet et al., 2005; Cartes et al., 2001; Frutos and Sorbe, 2017; Le Loc'h et al., 2008; Pérez et al., 2007).

The growth rate (mgN per day) and mortality rate (per day) were assumed to be those set in the SE-  
140 Australian Atlantis model (Fulton et al., 2004).

The depth was set at 30-400 m (Sorbe and Elizalde, 2014). Detailed vertical distribution can be found in Section S3, Table S6. The horizontal distribution was characterized weighing each of the boxes from the total area of the Bay of Biscay. Detailed horizontal distribution can be found in Section S3, Fig. S1.

The 84% of its diet corresponds to detritus, the remaining 16% being made up of polychaetes, other  
145 invertebrates, mesozooplankton, microzooplankton and discards (Cartes et al., 2001). Detailed diet matrix can be found in Section S4, Table S7.

### **Polychaetes**

The group was initialized with a biomass of 0.86 t km<sup>-2</sup> (Lastra et al., 2006; Le Loc'h et al., 2008; Lourido et al., 2014).

150 The growth rate (mgN per day) and mortality rate (per day) were assumed to be those set in the SE-Australian Atlantis model (Fulton et al., 2004).

The depth range for the group was assumed to be 0-5000 m (pers. comm. Xavier Corrales). Detailed vertical distribution can be found in Section S3, Table S6. The horizontal distribution was characterized taking into account the information gathered from DEMERSALES and EVHOE bottom trawl surveys  
155 (ICES, 2017d). Detailed horizontal distribution can be found in Section S3, Fig. S1.

Polychaetes main source of food are the detritus, being this specie the 94% of its diet (Andresen and Kristensen, 2002; Checon et al., 2016; Dubois et al., 2003; Jumars et al., 2015; Magalhães and Barros, 2011). Detailed diet matrix can be found in Section S4, Table S7.

## **Bivalves**

160 The group was initialized with a biomass of  $0.86 \text{ t km}^{-2}$  (Lastra et al., 2006; Le Loc'h et al., 2008; Serrano et al., 2006).

The growth rate (mgN per day) and mortality rate (per day) were assumed to be those set in the SE-Australian Atlantis model (Fulton et al., 2004).

Based on the information of depth range gathered in Palomares and Pauly (2021) for the bivalves  
165 species included in DEMERSALES and EVHOE bottom trawl surveys (ICES, 2017d), a depth range of 0-200 m was assumed for the group. Detailed vertical distribution can be found in Section S3, Table S6. The horizontal distribution was characterized taking into account the information gathered from DEMERSALES and EVHOE bottom trawl surveys (ICES, 2017d). Detailed horizontal distribution can be found in Section S3, Fig. S1.

170 The diet of bivalves consists mainly of the phytoplankton and detritus groups, with large phytoplankton being the main source of food (57% of the total diet) (Chauvaud et al., 2001; Heral, 1989; Langdon and Newell, 1990; Lehane and Davenport, 2002; Nerot et al., 2012; Page and Lastra, 2003; Perez et al., 2013). Detailed diet matrix can be found in Section S4, Table S7.

## Detritus-feeders decapods

175 This group was parameterized based upon *Munida sarsi*, the most abundant specie from DEMERSALES and EVHOE bottom trawl surveys (ICES, 2017d). It was initialized with a biomass of 1.57 t km<sup>-2</sup> obtained from DEMERSALES and EVHOE bottom trawl surveys (ICES, 2017d).

The growth rate (mgN per day) and mortality rate (per day) were assumed to be those set in the SE-Australian Atlantis model (Fulton et al., 2004).

180 *Munida sarsi* lives abundantly at depths of 700-800 m (Wikipedia, 2018). Other species included in the group, however, have a different depth distribution. Delta prawn (*Palaemon longirostris*), can be found in the surface up to 17 m (Palomares and Pauly, 2021), whilst *munida iris* and *munida tenuimana* can be found at around 1300 m and 1900 m (Palomares and Pauly, 2021), respectively. We therefore assumed a depth range of 0-1300 m for the group as a whole. Detailed vertical distribution can be found  
185 in Section S3, Table S6. The horizontal distribution was characterized taking into account the information gathered from DEMERSALES and EVHOE bottom trawl surveys (ICES, 2017d). Detailed horizontal distribution can be found in Section S3, Fig. S1.

This group feeds in almost all invertebrate groups included in the Bay of Biscay Atlantis model, although detritus is the main resource of food (41% of the total diet) (Ansell et al., 1999; Cartes et al.,  
190 2007; Lagardère, 1977). Detailed diet matrix can be found in Section S4, Table S7.

## Benthos-feeders decapods

This group is composed by shrimps, lobsters and crabs, although it was parameterized based upon edible crab (*Cancer pagurus*), the most abundant specie from DEMERSALES and EVHOE bottom trawl surveys (ICES, 2017d). This group was initialized with a biomass of 1.81 t km<sup>-2</sup> obtained from  
195 DEMERSALES and EVHOE bottom trawl surveys (ICES, 2017d).

The growth rate (mgN per day) and mortality rate (per day) were assumed to be those set in the SE-Australian Atlantis model (Fulton et al., 2004).

The edible crab's depth range is set at 6-40 m (Palomares and Pauly, 2021). Almost all species included in the group has a shallow distribution (the information for all the species was gathered from  
200 Palomares and Pauly (2021)), but *Macropodia longipes* and *Polycheles typhlops*, which are found at depths of 1249 m and 2195 m, respectively (Palomares and Pauly, 2021). We therefore assumed a depth

range of 0-1400 m for the group as a whole. Detailed vertical distribution can be found in Section S3, Table S6. The horizontal distribution was characterized taking into account the information gathered from DEMERSALES and EVHOE bottom trawl surveys (ICES, 2017d). Detailed horizontal distribution can  
205 be found in Section S3, Fig. S1.

The diet of this group consists mainly of polychaetes, suprabenthos and other detritus (50 % of the diet is made up of these three groups) (Abello, 2008; Allen, 1965; Ansell et al., 1999; Bernárdez et al., 2000; Cartes, 1995; Cartes et al., 2007; Freire, 1996; Lagardère, 1977; Monfort, 1986). Detailed diet matrix can be found in Section S4, Table S7.

### 210 **Zooplankton feeding shrimps**

This group was parameterized based upon arrow shrimp (*Plesionika heterocarpus*), the most abundant specie according to DEMERSALES and EVHOE bottom trawl surveys (ICES, 2017d). This group was initialized with a biomass of 1.21 t km<sup>-2</sup> obtained from DEMERSALES and EVHOE bottom trawl surveys (ICES, 2017d).

215 The growth rate (mgN per day) and mortality rate (per day) were assumed to be those set in the SE-Australian Atlantis model (Fulton et al., 2004).

The arrow shrimps maximum depth is considered to be 850 m (Palomares and Pauly, 2021). Pink glass shrimp (*Pasiphaea multidentata*), however, can be found at 2000 m depth (Palomares and Pauly, 2021). We therefore assumed a depth range of 10-2000 m for the group as a whole. Detailed vertical  
220 distribution can be found in Section S3, Table S6. The horizontal distribution was characterized taking into account the information gathered from DEMERSALES and EVHOE bottom trawl surveys (ICES, 2017d). Detailed horizontal distribution can be found in Section S3, Fig. S1.

The diet of this group is composed of mesopelagic fish, benthopelagic fish, zooplankton feeding shrimps, benthos- and detritus-feeders decapods, bivalves, polychaetes, suprabenthos, echinoderms, other  
225 invertebrates, zooplankton, detritus and discards (Cartes, 1993b, a; Cartes, 1991; Cartes, 1998; Cartes et al., 2007; Fanelli and Cartes, 2004; Lagardère, 1977). Detailed diet matrix can be found in Section S4, Table S7.

## **Pelagic crab**

The pelagic crab group represents the Henslow's swimming crab (*Polybius henslowii*). It was  
230 initialized with a biomass of  $0.55 \text{ t km}^{-2}$  obtained from DEMERSALES and EVHOE bottom trawl surveys  
(ICES, 2017d).

The growth rate (mgN per day) and mortality rate (per day) were assumed to be those set in the SE-  
Australian Atlantis model (Fulton et al., 2004).

Henslow's swimming crab can be found at depths of 0-500 m (Palomares and Pauly, 2021). Detailed  
235 vertical distribution can be found in Section S3, Table S6. The horizontal distribution was characterized  
taking into account the information gathered from DEMERSALES and EVHOE bottom trawl surveys  
(ICES, 2017d). Detailed horizontal distribution can be found in Section S3, Fig. S1.

Around 42% of the diet of Henslow's swimming consists of discards, being the remaining 58%  
squids, pelagic crab, zooplankton feeding shrimps, benthos- and detritus-feeders decapods, polychaetes,  
240 suprabenthos, other invertebrates, gelatinous zooplankton, macrozooplankton, mesozooplankton and  
detritus (López López, 2017; Signa et al., 2008). Detailed diet matrix can be found in Section S4, Table  
S7.

## **Norway lobster**

The Norway lobster was initialized with a biomass of  $0.11 \text{ t km}^{-2}$  estimated from DEMERSALES  
245 and EVHOE bottom trawl surveys (ICES, 2017d).

The growth rate (mgN per day) and mortality rate (per day) were assumed to be those set in the SE-  
Australian Atlantis model (Fulton et al., 2004).

Based on the ICES (2016d) stock annex report, Norway lobster's distribution in the southern Bay of  
Biscay and northern Galicia is limited to depths ranging from 90-600 m. Detailed vertical distribution can  
250 be found in Section S3, Table S6. The horizontal distribution was characterized taking into account the  
information gathered from DEMERSALES and EVHOE bottom trawl surveys (ICES, 2017d). Detailed  
horizontal distribution can be found in Section S3, Fig. S1.

The Norway lobster feeds mainly in polychaetes and detritus, and to a lesser extent, in benthic  
cephalopods, zooplankton feeding shrimps, benthos-feeders decapods, detritus-feeders decapods,  
255 bivalves, suprabenthos, echinoderms, other invertebrates, macrozooplankton, mesozooplankton and

discards (Cristo and Cartes, 1998; Lagardère, 1977). Detailed diet matrix can be found in Section S4, Table S7.

## **Squids**

260 The squids group was parameterized based on veined squid (*Loligo forbesi*), the most abundant squid specie of DEMERSALES and EVHOE bottom trawl surveys (ICES, 2017d). The group was initialized with a biomass of 0.28 t km<sup>-2</sup> obtained from DEMERSALES and EVHOE bottom trawl surveys (ICES, 2017d).

The growth rate (mgN per day) and mortality rate (per day) were assumed to be those set in the SE-Australian Atlantis model (Fulton et al., 2004).

265 Based on Palomares and Pauly (2021), the veined squids maximum depth is established at 431 m. Northern shortfin (*Illex illecebrosus*) squid and European flying squid (*Todarodes sagittatus*), however, can be found deeper, at 1000 m and 2500 m, respectively (Palomares and Pauly, 2021). We therefore assumed a depth range of 0-2000 m for the group as a whole. Detailed vertical distribution can be found in Section S3, Table S6. The horizontal distribution was characterized taking into account the information  
270 gathered from DEMERSALES and EVHOE bottom trawl surveys (ICES, 2017d). Detailed horizontal distribution can be found in Section S3, Fig. S1.

The squids feed in almost all the species included in the model, although, anchovy, other planktivorous fishes, mesopelagic fish and zooplankton-feeding shrimps are the main sources of food (Lordan et al., 1998; Lordan et al., 2001; Pierce et al., 1994; Rasero et al., 1996; Rocha et al., 1994; Rosas-  
275 Luis and Sánchez, 2015; Rosas-Luis et al., 2014; Valls Mir, 2017). Detailed diet matrix can be found in Section S4, Table S7.

## **Benthic cephalopods**

The benthic cephalopods group is composed of octopuses, squids and cuttlefishes. However, the group was parameterized based on common octopus (*Octopus vulgaris*), the most abundant species of  
280 DEMERSALES and EVHOE bottom trawl surveys (ICES, 2017d). The group was initialized with a biomass of 0.44 t km<sup>-2</sup> estimated from DEMERSALES and EVHOE bottom trawl surveys (ICES, 2017d).

The growth rate (mgN per day) and mortality rate (per day) were assumed to be those set in the SE-Australian Atlantis model (Fulton et al., 2004).

The common octopus is more abundant in the first 100 m (Palomares and Pauly, 2021). Globose  
285 octopus (*Bathypolypus sponsalis*), however, can be found up to 700 m (Palomares and Pauly, 2021),  
whilst spider octopus (*Octopus salutii*) and elegant cuttlefish (*Sepia elegans*) in depths of 500 m  
(Palomares and Pauly, 2021). We therefore assumed a depth range of 0-700 m for the group as a whole.  
Detailed vertical distribution can be found in Section S3, Table S6. The horizontal distribution was  
characterized taking into account the information gathered from DEMERSALES and EVHOE bottom  
290 trawl surveys (ICES, 2017d). Detailed horizontal distribution can be found in Section S3, Fig. S1.

The diet consists mainly of small demersal fishes, benthos- and detritus-feeders decapods and  
bivalves (Ajana et al., 2018; Alves et al., 2006; Castro and Guerra, 1990; Du Sel et al., 2000; Hernández  
López, 2000; Neves et al., 2009; Regueira et al., 2017; Valls Mir, 2017). Detailed diet matrix can be found  
in Section S4, Table S7.

## 295 **Deep-sea fishes**

The deep-sea fishes group was parameterized based upon roughsnout grenadier (*Trachyrincus  
scabrus*), the most abundant species of DEMERSALES and EVHOE bottom trawl surveys (ICES,  
2017d). It was initialized with a biomass of 0.07 t km<sup>-2</sup> estimated from DEMERSALES and EVHOE  
bottom trawl surveys (ICES, 2017d).

300 Roughsnout grenadier can live up to 11 years and measure 45 cm (Froese and Pauly, 2021). There  
was not possible to find maturity age information for roughsnout grenadier, but alfonsino (*Beryx  
decadactylus*) mature at 2.3-4 years (ICES, 2011). Detailed fractions of each age class which is mature  
can be found in Section S2, Table S3. The weight-at-age distribution was characterized assuming a linear  
growth in length and using the general length-weight formula of  $W = 0.00129 \cdot L^{3.232}$  from Froese and  
305 Pauly (2021). The growth rate for each age class (mgN per day) was estimated based on the amount of  
weight each individual needs to gain to reach the weight of the next age class within a given time window  
of 1 year. Detailed growth rate per age class can be found in Section S2, Table S4.

In the Northeastern Atlantic roughsnout grenadier spawn between February and March (Froese and  
Pauly, 2021). No information on recruitment was found for this specie, hence, we assumed that the  
310 recruitment parameters for this group are those set in the SE-Australian Atlantis model (Fulton et al.,  
2004).



The natural mortality used was this set for alfonsino, 0.23 per year (ICES, 2011). Following the guidelines from Audzijonyte et al. (2017), mortality rates of  $6.301 \cdot 10^{-08}$  and  $3.151 \cdot 10^{-12}$  per day for juveniles and adults, respectively, were assumed for the Bay of Biscay Atlantis model.

315 Roughsnout grenadiers are most commonly found at depths from 395 to 1700 m (Froese and Pauly, 2021). Other species included in the group, however, are found in different depths, such as red bandfish (*Cepola macrophthalma*), at 15-400 m (Froese and Pauly, 2021), and Kaup's arrowtooth eel (*Synaphobranchus kaupii*), at 400-2200 m (Froese and Pauly, 2021). We therefore assumed a depth range of 15-2000 m for the group as a whole. The vertical distribution was then defined based on the proportion  
320 of each vertical layer to the total depth of the area. Detailed vertical distribution can be found in Section S3, Table S6. No information about swimming speed for roughsnout grenadier was found, but both *Notacanthus Bonaparte* and Kaup's arrowtooth eel have a burst swim speed of between 1-1.5 m s<sup>-1</sup> (Clough et al., 2004). Therefore, a swimming speed of 1.25 m s<sup>-1</sup> was assumed for the group. The horizontal distribution was characterized with information from DEMERSALES and EVHOE bottom  
325 trawl surveys (ICES, 2017d). Detailed horizontal distribution can be found in Section S3, Fig. S1.

Adult deep-sea fishes prey on mesopelagic fish, medium and small demersal fishes, cephalopods, Norway lobster, zooplankton feeding shrimps, decapods, polychaetes, suprabenthos, echinoderms, other invertebrates, gelatinous zooplankton, microzooplankton and mesozooplankton (Dürr and González (2002); Modica et al. (2014); Pais (2002); Saldanha et al. (1995) and IEO database). Juveniles, however,  
330 feed less on vertebrate fishes and more on invertebrate fishes, mainly on zooplankton feeding shrimps, benthos-feeders decapods and suprabenthos (pers. comm. Xavier Corrales). Detailed diet matrix can be found in Section S4, Table S7.

### **Small demersal fishes**

This group was parameterized based upon axillary seabream (*Pagellus acarne*), the most abundant  
335 specie from DEMERSALES and EVHOE bottom trawl surveys (ICES, 2017d). It was initialized with a biomass of 0.93 t km<sup>-2</sup> estimated from DEMERSALES and EVHOE bottom trawl surveys (ICES, 2017d).

Axillary seabreams mature at 2-3 years and can reach a maximum age of 7 years (Froese and Pauly, 2021). Detailed fractions of each age class which is mature can be found in Section S2, Table S3. The weight-at-age distribution was estimated based on the total length by age for the Gulf of Cadiz and

340 Alboran Sea from Velasco et al. (2011) and the general length-weight formula of  $W = 0.00856 \cdot L^{3.131}$  from Froese and Pauly (2021). The growth rate for each age class (mgN per day) was defined based on the amount of weight each individual needs to gain to reach the weight of the next age class within a given time window of 1 year. Detailed growth rate per age class can be found in Section S2, Table S4.

In the Eastern Atlantic axillary seabream spawning starts in March and ends in April (Froese and  
345 Pauly, 2021). No information on recruitment was found, so we assumed that the recruitment parameters for this group are those set in the SE-Australian Atlantis model (Fulton et al., 2004).

A natural mortality of 0.43 per year is established for axillary seabream (Froese and Pauly, 2021). Following the guidelines from Audzijonyte et al. (2017), mortality rates of  $5.89 \cdot 10^{-12}$  and  $1.178 \cdot 10^{-07}$  per day for juveniles and adults, respectively, were assumed for the Bay of Biscay Atlantis model.

350 Axillary seabreams are usually found between 40-100 m depth (Froese and Pauly, 2021). White seabream (*Diplodus sargus*) and common Atlantic grenadier (*Nezumia aequalis*), however, are found in different depths, at 0-50 m and 200-1000 m, respectively (Froese and Pauly, 2021). We therefore assumed a depth range of 0-1000 m for the group as a whole. Detailed vertical distribution can be found in Section S3, Table S6. Swimming speed information for red gurnard (*Chelidonichthys cuculus*) and sand goby  
355 (*Pomatoschistus minutus*) was found instead of for axillary seabream. Red gurnard swims at a speed of  $0.47 \text{ m s}^{-1}$  and sand goby at a speed of  $0.27 \text{ m s}^{-1}$  (Froese and Pauly, 2021). In consequence, a swimming speed of  $0.37 \text{ m s}^{-1}$  was assumed for the group. The horizontal distribution was characterized using information from DEMERSALES and EVHOE bottom trawl surveys (ICES, 2017d). Detailed horizontal distribution can be found in Section S3, Fig. S1.

360 Adult small demersal fishes feed on other planktivorous fishes, blue whiting, common sole, flatfishes, small demersal fishes and all invertebrates fish but Norway lobster (Almeida, 2003; Castro et al., 2013; Gibson and Ezzi, 1987; Gonçalves and Erzini, 1998; Leitao et al., 2007; Leitão et al., 2006; López-López et al., 2011; Morato et al., 2001; O'Connell and Fives, 1995; Pita et al., 2002; Saldanha et al., 1995). Juveniles', however, prey less on vertebrate fish and more on invertebrate fish (pers. comm. Xavier  
365 Corrales). Detailed diet matrix can be found in Section S4, Table S7.

## Medium demersal fishes

The medium demersal fishes group was parameterized based upon blackbelly rosefish (*Helicolenus dactylopterus*), the most abundant species of DEMERSALES and EVHOE bottom trawl surveys (ICES, 2017d). It was initialized with a biomass of 0.22 t km<sup>-2</sup> estimated from DEMERSALES and EVHOE  
370 bottom trawl surveys (ICES, 2017d).

A maximum age of 43 was found for blackbelly rosefish in France (Froese and Pauly, 2021). We therefore assumed a maximum age of 40 for the Bay of Biscay Atlantis model. Blackbelly rosefish mature between 13 and 16 years and with a length of 32 m (Froese and Pauly, 2021). Detailed fractions of each age class which is mature can be found in Section S2, Table S3. The weight-at-age distribution was  
375 characterized based on the mean length by age from White et al. (1998) and the general length-weight formula of  $W = 0.01072 \cdot L^{3.08}$  from Froese and Pauly (2021). The growth rate for each age class (mgN per day) was calculated based on the amount of weight each individual needs to gain to reach the weight of the next age class within a given time window of 4 years. Detailed growth rate per age class can be found in Section S2, Table S4.

380 In the Northeast Atlantic blackbelly rosefish spawn between November and December (Froese and Pauly, 2021). No information about recruitment parameters were found, hence, we assumed that the recruitment parameters for this group are those set in the SE-Australian Atlantis model (Fulton et al., 2004).

The natural mortality is fixed at 0.12 per year (Froese and Pauly, 2021). Following the guidelines  
385 from Audzijonyte et al. (2017), mortality rates of  $1.644 \cdot 10^{-12}$  and  $3.288 \cdot 10^{-08}$  per day for juveniles and adults, respectively, were assumed for the Bay of Biscay Atlantis model.

Blackbelly rosefish can be usually found from 150-600 m (Froese and Pauly, 2021). Other species included in the group, such as sand steenbras (*Lithognathus mormyrus*) and whiting (*Merlangius merlangus*) have a shallower distribution, exactly 10-20 m (Froese and Pauly, 2021) and 30-100 m (Froese  
390 and Pauly, 2021), respectively. We therefore assumed a depth range of 0-600 m for the group as a whole. Detailed vertical distribution can be found in Section S3, Table S6. There was not possible to found swimming speed information for blackbelly rosefish, but whiting swims at a speed of 0.23 m s<sup>-1</sup> (Froese and Pauly, 2021). The horizontal distribution was characterized using information from DEMERSALES

and EVHOE bottom trawl surveys (ICES, 2017d). Detailed horizontal distribution can be found in Section  
395 S3, Fig. S1.

Adult medium demersal fishes prey on anchovy, other planktivorous fishes, mesopelagic fish, blue  
whiting, flatfishes, large demersal fishes, medium demersal fishes, small demersal fishes, deep sea fishes  
and almost all invertebrates, mainly decapods (Castro et al. (2013); Gibson and Ezzi (1987); Morato et  
al. (2001); Neves et al. (2012); Pita et al. (2002); Rault et al. (2017) and IEO database). Juvenile medium  
400 demersal fishes, however, do not feed on large, medium and deep-sea fishes and feed more on invertebrate  
species (pers. comm. Xavier Corrales). Detailed diet matrix can be found in Section S4, Table S7.

### **Large demersal fishes**

This group was parameterized based upon European conger (*Conger conger*), the most abundant  
species of DEMERSALES and EVHOE bottom trawl surveys (ICES, 2017d). It was initialized with a  
405 biomass of  $0.46 \text{ t km}^{-2}$  obtained from DEMERSALES and EVHOE bottom trawl surveys (ICES, 2017d).

European conger can reach a maximum age of 11 years for males and 19 years for females (Froese  
and Pauly, 2021). In consequence, a maximum age of 20 years was assumed for the Bay of Biscay Atlantis  
model. It matures at the age of 5 years (Froese and Pauly, 2021). Detailed fractions of each age class  
which is mature can be found in Section S2, Table S3. The weight-at-age distribution was characterized  
410 based on the total length per age by Correia et al. (2009) and the general length-weight formula of  $W =$   
 $0.000203 \cdot L^{3.4991}$  from Froese and Pauly (2021). The growth rate for each age class (mgN per day) was  
then calculated based on the amount of weight each individual needs to gain to reach the weight of the  
next age class within a given time window of 2 years. Detailed growth rate per age class can be found in  
Section S2, Table S4.

415 Information on spawning for the Bay of Biscay could not be found, but in the Portugal coast,  
spawning occurs between June and August, with a larval stage duration of 127 days (Froese and Pauly,  
2021). We therefore assumed a spawning period of June-August and a larval stage duration of 127 days  
for the Bay of Biscay Atlantis model. No information about length of time recruits arrive over was found,  
hence, we assumed that the length of time recruits arrive over for the Bay of Biscay Atlantis model is that  
420 set in the SE-Australian Atlantis model (Fulton et al., 2004).

The natural mortality was assumed to be 0.2 per year (pers. comm. Cecilie Hansen). Following the guidelines from Audzijonyte et al. (2017), mortality rates of  $2.7395 \cdot 10^{-12}$  and  $5.479 \cdot 10^{-08}$  per day for juveniles and adults, respectively, were assumed for the Bay of Biscay Atlantis model.

European conger can be found at a depth range of 0-1000 m (Froese and Pauly, 2021). Detailed vertical distribution can be found in Section S3, Table S6. No swimming speed information was found for European conger, but for Atlantic cod (*Gadus morhua*) and haddock (*Melanogrammus aeglefinus*). Atlantic cod mean speed in a tank is around  $0.4 \text{ bl s}^{-1}$  (Bjornsson, 1993), meaning bl common length, so with a common length of 1 m (Froese and Pauly, 2021), a speed of  $0.4 \text{ m s}^{-1}$ . Haddock burst speed is set between  $1.83 \text{ m s}^{-1}$  and  $2.46 \text{ m s}^{-1}$  (Froese and Pauly, 2021). We therefore assumed a swimming speed of around  $1 \text{ m s}^{-1}$  for the group. The horizontal distribution was characterized based on the information from DEMERSALES and EVHOE bottom trawls surveys (ICES, 2017d). Detailed horizontal and vertical distribution can be found in Section S3, Fig. S1.

The adult large demersal fishes feed on demersal and deep-sea sharks and in almost all fish groups, being blue whiting, pouts and small demersal fishes the main source of food (Bergstad (1991); Hubans et al. (2017); Rault et al. (2017) and IEO database). Juvenile large demersal fishes, however, do not prey on sharks and large, medium and deep-sea fishes (pers. comm. Xavier Corrales). Detailed diet matrix can be found in Section S4, Table S7.

## Mulletts

The mullets group is composed by surmullet (*Mullus surmuletus*) and red mullet (*Mullus barbatus*). However, it was parameterized based upon surmullet as it is the most abundant species of DEMERSALES and EVHOE bottom trawl surveys (ICES, 2017d). The group was initialized with a biomass of  $0.07 \text{ t km}^{-2}$  estimated from DEMERSALES and EVHOE bottom trawl surveys (ICES, 2017d).

In the Eastern Channel, a surmullet live a maximum age of 11 years and mature at 1-2 years (ICES, 2015). We therefore assumed a longevity of 11 years and maturity age of 1 year for the Bay of Biscay Atlantis model. The maturity-at-age proportion was defined based on the information from the ICES (2015) report, described in detailed in Section S2, Table S3. The weight distribution was characterized based on the mean length-at-age information from ICES (2015) and the general length-weight formula of  $W = 0.00512 \cdot L^{3.2956}$  from Ravard et al. (2014). The growth rate for each age class (mgN per day) was

then estimated based on the amount of weight each individual needs to gain to reach the weight of the  
450 next age class within a given time window of 1 year. Detailed growth rate per age class can be found in  
Section S2, Table S4.

In the Eastern Channel and North Sea spawning occurs between May and August, with a peak in  
June (ICES, 2015). We therefore assumed a spawning period of May-August for the Bay of Biscay  
Atlantis mode. No information about recruitment was found for mullets, so we assumed that for this group  
455 the recruitment parameters are those set in the SE-Australian Atlantis model (Fulton et al., 2004).

The natural mortality rates were calculated based on the mortality values by age per year from ICES  
(2015). Following the guidelines from Audzijonyte et al. (2017), mortality rates of  $2.863 \cdot 10^{-07}$  and  
 $1.087 \cdot 10^{-07}$  per day for juveniles and adults, respectively were assumed for the Bay of Biscay Atlantis  
model.

460 They can be found around the first 100 m (Mahé et al., 2005), although large surmullets were  
observed at more than 300 m (Caill-Milly et al., 2017). We therefore assumed a depth range of 0-300 m  
for the group. Detailed vertical distribution can be found in Section S3, Table S6. Swimming speed for  
surmullet nor red mullet could be found. Therefore, we assumed that surmullets swim at a same speed as  
seabass,  $0.6 \text{ m s}^{-1}$ . The horizontal distribution was determined taking advantage of the information from  
465 DEMERSALES and EVHOE bottom trawl surveys (ICES, 2017d). Detailed horizontal distribution can  
be found in Section S3, Fig. S1.

Around 50 % of their diet consists of polyachetes, and the remaining percentage corresponds to small  
demersal fishes, benthic cephalopods, zooplankton feeding shrimps, decapods, bivalves, suprabenthos,  
echinoderms, other invertebrates, microzooplankton and benthic primary producers (IEO database).  
470 Detailed diet matrix can be found in Section S4, Table S7.

## **Flatfishes**

The flatfishes group was parameterized based upon thickback sole (*Microchirus variegatus*), the  
most abundant species of DEMERSALES and EVHOE bottom trawl surveys (ICES, 2017d). It was  
initialized with a total biomass of  $0.12 \text{ t km}^{-2}$  estimated from DEMERSALES and EVHOE bottom trawl  
475 surveys (ICES, 2017d).

Thickback sole can live for a maximum of 14 years and measure a maximum length of 21 cm (Froese and Pauly, 2021). It matures at 3 years (Froese and Pauly, 2021). Detailed fractions of each age class which is mature can be found in Section S2, Table S3. The weight-at-age distribution was estimated using the maximum length above mentioned and the assumption of a linear growth in length together with the  
480 general length-weight formula of  $W = 0.00137 \cdot L^{3.543}$  from Froese and Pauly (2021). The growth rate for each age class (mgN per day) was then calculated based on the amount of weight each individual needs to gain to reach the weight of the next age class within a given time window of 1 year. Detailed growth rate per age class can be found in Section S2, Table S4.

There was no spawning information available for the area, but in the Mediterranean Sea, thickback  
485 sole spawns in February (Froese and Pauly, 2021). We therefore assumed that this group spawns in February for the Bay of Biscay Atlantis model. The recruitment parameters were assumed to be those set in the SE-Australian Atlantis model (Fulton et al., 2004).

The natural mortality was assumed to be 0.2 per year (pers. comm. Cecilie Hansen). Following the guidelines from Audzijonyte et al. (2017), mortality rates of  $2.7395 \cdot 10^{-12}$  and  $5.479 \cdot 10^{-08}$  per day for  
490 juveniles and adults, respectively, were assumed for the Bay of Biscay Atlantis model.

Thickback sole can be found from 20 to 400 m (Froese and Pauly, 2021). However, other species included in the group can be found in different depth ranges, such as deep water sole (*Bathysolea profundicola*), between 200 and 600 m (Froese and Pauly, 2021), solenette (*Buglossidium luteum*), between 10 and 40 m (Froese and Pauly, 2021) and brill (*Scophthalmus rhombus*), between 5 and 50 m  
495 (Froese and Pauly, 2021). We therefore assumed a depth range of 0-600 m for the group as a whole. Detailed vertical distribution can be found in Section S3, Table S6. Swimming speed for thickback sole could not be found, but European plaice (*Pleuronectes platessa*) swim at a speed of  $0.34 \text{ m s}^{-1}$  (Froese and Pauly, 2021). The horizontal distribution was characterized using the information from DEMERSALES and EVHOE bottom trawl surveys (ICES, 2017d). Detailed horizontal distribution can  
500 be found in Section S3, Fig. S1.

Adult flatfishes feed mainly on small demersal fishes, polychaetes and suprabenthos (Allen et al., 2004; Cabral et al., 2002; Castro et al., 2013; Cresson et al., 2014; Paulo-Martins et al., 2011; Rodriguez, 1996; Teixeira et al., 2009; Vinagre et al., 2011). The juveniles, however, prey more on zooplankton

505 feeding shrimps, decapods and bivalves (pers. comm. Xavier Corrales). Detailed diet matrix can be found on Section S4, Table S7.

### Common sole

The common sole was initialized with a biomass of  $0.14 \text{ t km}^{-2}$  obtained from DEMERSALES and EVHOE bottom trawl surveys (ICES, 2017d).

510 They live up to 26 years (Froese and Pauly, 2021) and are fully mature at 3 years (ICES, 2016a). The maturity-at-age proportion was defined based on the information from the ICES (2016a) report, described in detailed in Section S2, Table S3. The weight-at-age distribution was characterized based on information on total length for male and female from Parker-Humphreys (2004) and the general length-weight formula of  $W = 0.00475 \cdot L^{3.181}$  from Ravard et al. (2014). Once the weight per age was estimated, growth rate for each age class (mgN per day) were calculated based on the amount of weight each individual needs to  
515 gain to reach the weight of the next age class within a given time window of 3 years. Detailed growth rate per age class can be found in Section S2, Table S4.

Common sole's spawn between December and May in Cantabrian Sea and Atlantic Iberian waters with a larval stage duration of 35 days (Froese and Pauly, 2021). The length of time recruits arrive over was assumed to be that set in the SE-Australian Atlantis model (Fulton et al., 2004).

520 The natural mortality is assumed to be 0.1 for all age groups (ICES, 2016a). Following the guidelines from Audzijonyte et al. (2017), mortality rates of  $1.37 \cdot 10^{-12}$  and  $2.74 \cdot 10^{-08}$  per day for juveniles and adults, respectively, were assumed for the Bay of Biscay Atlantis model.

In the northern and central Bay of Biscay the common sole can be found at less than 150 m (ICES, 2016a) and in the Cantabrian Sea and Atlantic Iberian waters at around 100-200 m (ICES, 2014c). We  
525 therefore assumed a depth range of 0-200 m for the Bay of Biscay Atlantis model. Detailed vertical distribution can be found in Section S3, Table S6. The swimming speed was assumed to be the same as another flatfish species, American plaice (*Hippoglossoides platessoides*). This specie swim at around  $1.05 \text{ m s}^{-1}$  (Winger et al., 1999). The horizontal distribution was characterized based on the information from DEMERSALES and EVHOE bottom trawl surveys (ICES, 2017d). Detailed horizontal distribution can  
530 be found in Section S3, Fig. S1.



The adult common sole's diet is composed by small demersal fishes, zooplankton feeding shrimps, benthos-feeders decapods, detritus-feeders decapods, bivalves, polychaetes, suprabenthos and echinoderms (Cabral, 2000; Rault et al., 2017; Rijnsdorp and Vingerhoed, 2001). The juveniles have the same diet but feed less on benthos-feeders decapods and more on suprabenthos (pers. comm. Xavier  
535 Corrales). Detailed diet matrix can be found in Section S4, Table S7.

## Megrim

Four-spot megrim (*Lepidorhombus boscii*) and megrim (*Lepidorhombus whiffiagonis*) species were included in this group. However, it was parameterized based upon megrim as it is the most abundant species of DEMERSALES and EVHOE bottom trawl surveys (ICES, 2017d). It was initialized with a  
540 total biomass of 0.10 t km<sup>-2</sup> obtained from DEMERSALES and EVHOE bottom trawl surveys (ICES, 2017d).

The maximum age for megrim varies with the ICES subareas. In the southern Bay of Biscay and East Atlantic Iberian waters the maximum age for megrim is considered to be 12 years (ICES, 2014d), whereas in the West and Southwest of Ireland and Bay of Biscay the maximum age is about 14-15 years (ICES,  
545 2018b). In consequence, a maximum age of 15 years was assumed for the Bay of Biscay Atlantis model. 50 % of the individuals mature at about 2.5 year old and 20 cm length (ICES, 2018b). The exact proportion of maturity was estimated based on the mean of the proportion of fish mature at each age for ICES 8 abd (ICES, 2018b) and 8c subareas (ICES, 2014d). Detailed fractions of each age class which is mature can be found in Section S2, Table S3. The weight-at-age distribution was estimated using mean length-at-age  
550 from Landa and Piñeiro (2000) and the general length-weight formula of  $W = 0.0065 \cdot L^{3.0114}$  from (ICES, 2014d). The growth rate for each age class (mgN per day) was then calculated based on the amount of weight each individual needs to gain to reach the weight of the next age class within a given time window of 2 years. Detailed growth rate per age class can be found in Section S2, Table S4.

The spawning period of these species is short. In the ICES 8c and 9a subareas mature males can be  
555 found from November to March and mature females from December to March (ICES, 2014d). In the ICES 7 b-k and 8 abd subareas, however, from January to March (ICES, 2018b). We therefore assumed a spawning period from November to March for the Bay of Biscay Atlantis model. No information about

recruitment was found for the area, hence, we assumed that the recruitment parameters are those set in the SE-Australian Atlantis model (Fulton et al., 2004).

560 The natural mortality is set to 0.2 and assumed constant over all ages and years (ICES, 2014d, 2018b). Consequently and following the guidelines from Audzijonyte et al. (2017), mortality rates of  $2.7395 \cdot 10^{-12}$  and  $5.479 \cdot 10^{-08}$  per day for juveniles and adults, respectively, were assumed for the Bay of Biscay Atlantis model.

There is a certain bathymetric difference between the two species of megrim. Four-spot megrim can be found at depths ranging from 100 to 450 m in the southern Bay of Biscay and Atlantic Iberian waters (ICES 8c and 9a subareas) whereas megrim has a preferential depth range of 50 to 300 m (ICES, 2014d). In the west and southwest of Ireland and the Bay of Biscay (ICES 7b-k and 8abd subareas), four-spot megrim can be found between 200-600 m, whereas megrim between 100-300 m, although can dive up to 800 m (ICES, 2018b). We therefore assumed a depth range of 50-600 m for the group as a whole. Detailed vertical distribution can be found in Section S3, Table S6. The swimming speed was assumed to be the same as another flatfish species, American plaice (*Hippoglossoides platessoides*). This specie swim at around  $1.05 \text{ m s}^{-1}$  (Winger et al., 1999). The horizontal distribution was characterized based on the information from DEMERSALES and EVHOE bottom trawl surveys (ICES, 2017d). Detailed horizontal distribution can be found in Section S3, Fig. S1.

575 The diet of megrim is mainly composed by zooplankton feeding shrimps, benthos-feeders decapods and detritus-feeders decapods (IEO database), but juvenile megrim feed less on small pelagic fishes (pers. comm. Xavier Corrales). Detailed diet matrix can be found in Section S4, Table S7.

## Cods

The cods group is composed by Norway pout (*Trisopterus esmarkii*), pouting (*Trisopterus luscus*) and poor cod (*Trisopterus minutus*), although it was parameterized based upon poor cod, the most abundant species of DEMERSALES and EVHOE bottom trawl surveys (ICES, 2017d). It was initialized with a biomass of  $0.45 \text{ t km}^{-2}$  estimated from DEMERSALES and EVHOE bottom trawl surveys (ICES, 2017d).

The poor cod is a short-lived specie, living until age 4-6 in Strait of Sicily (Ragonese and Bianchini, 1998) with a maximum length of 24 cm (Froese and Pauly, 2021). We therefore assumed a maximum age

of 6 years for the Bay of Biscay Atlantis model. It matures at age 2 (Jennings et al., 1999) with a length of 13.4 cm (Froese and Pauly, 2021). Detailed fractions of each age class which is mature can be found in Section S2, Table S3. These length information together with the general length-weight formula of  $W = 0.0086 \cdot L^{2.98}$  from Froese and Pauly (2021) were used to estimate the weight-at-age distribution. The growth rate for each age class (mgN per day) was then calculated based on the amount of weight each individual needs to gain to reach the weight of the next age class within a given time window of 1 year. Detailed growth rate per age class can be found in Section S2, Table S4.

The spawning season of poor cod in the coast of Spain lasts from December to March (Froese and Pauly, 2021). Information about recruitment was not available, therefore, we assumed that for this groups the recruitment parameters are those set in the SE-Australian Atlantis model (Fulton et al., 2004).

No mortality information for poor cod was found for the area, neither for any other specie included in the group. In consequence, based upon mortality rates for lumpfish and Norway pout from the NoBa Atlantis model (Hansen et al., 2016), mortality rates of  $1.23 \cdot 10^{-10}$  and  $5.21 \cdot 10^{-10}$  per day for juveniles and adults, respectively, were assumed for the Bay of Biscay Atlantis model.

Poor cod is mostly found at depths from 50 to 200 m (Ragonese and Bianchini, 1998). Pouting, however, is found at 30-300 m depth range (Spitz, J. et al., 2006). We therefore assumed a depth range of 30-300 m for the group as a whole. Detailed vertical distribution can be found in Section S3, Table S6. No swimming speed was found for poor cod, but pouting swim at a speed of  $0.55 \text{ m s}^{-1}$  (Froese and Pauly, 2021), hence, this swimming speed was assumed for the group. The horizontal distribution was characterized based on the information from DEMERSALES and EVHOE bottom trawl surveys (ICES, 2017d). Detailed horizontal distribution can be found in Section S3, Fig. S1.

Adult cods prey on almost all demersal fishes and invertebrates, being benthos-feeders decapods the main source of food (Castro et al. (2013) and IEO database). Juveniles, however, do not feed on adult deep-sea fishes (pers. comm. Xavier Corrales). Detailed diet matrix can be found in Section S4, Table S7.

## 610 **Hake**

Although hake was split into two age groups (juvenile and adult) in the calculation of biomass and stomach content, in the Bay of Biscay Atlantis model was included as one age group. It was initialized

with a biomass of  $0.19 \text{ t km}^{-2}$ , calculated summing up the biomass of adult and juvenile hake estimated from DEMERSALES and EVHOE bottom trawls surveys (ICES, 2017d).

615 The longevity of hake is set at 10 years (ICES, 2016b, 2017b; Korta et al., 2015). The estimated age at which 50 % of individuals mature was considered 2.5 years for males, 4.4 years for females and 3.2 years for the combined sexes (Piñeiro and Sainza, 2003). We therefore assumed a maturity age of 2.5 years for the Bay of Biscay Atlantis model. Detailed fractions of each age class which is mature can be found in Section S2, Table S3. The weight-at-age distribution was estimated using mean length-at-age  
620 for combined sexes from Piñeiro and Sainza (2003) and the general length-weight formula of  $W = 0.00513 \cdot L^{3.074}$  from ICES (2016b). The growth rate for each age class (mgN per day) was calculated considering the amount of weight each individual needs to gain to reach the weight of the next age class within a given time window of 1 year. Detailed growth rate per age class can be found in Section S2, Table S4.

625 The spawning season of hake in the Iberian Atlantic area extends from December to May, with peaks in February (Piñeiro and Sainza, 2003). The duration of the larval period in the Bay of Biscay is estimated to last 39 days (Kacher and Amara, 2005). No information about the length of time recruits arrive over was found, hence, we assumed that for this group this parameter is that set in the SE-Australian Atlantis model (Fulton et al., 2004).

630 The natural mortality is determined to be 0.4 per year (ICES, 2016b, 2017b; Korta et al., 2015). Taking into consideration the guidelines from Audzijonyte et al. (2017) mortality rates of  $5.48 \cdot 10^{-12}$  and  $1.096 \cdot 10^{-07}$  per day for juveniles and adults, respectively, were assumed for the Bay of Biscay Atlantis model.

It lives mostly between 70 and 500 m, swimming at a speed of  $0.79 \text{ m s}^{-1}$  (Froese and Pauly, 2021),  
635 although it can be found from 30 m down to depths of 1000 m (Korta et al., 2015). We therefore assumed a depth range of 70-500 m for the Bay of Biscay Atlantis model. Detailed vertical distribution can be found in Section S3, Table S6. The horizontal distribution was characterized considering the information from DEMERSALES and EVHOE bottom trawls surveys (ICES, 2017d). Detailed horizontal distribution can be found in Section S3, Fig. S1.

640 Adult hake feed mainly on horse mackerel, sardine, anchovy, blue whiting and juvenile hake. Juvenile hake, however, do not prey on some adult species such as horse mackerel, sardine, anchovy and

blue whiting (Mahe et al. (2007); Velasco and Olaso (1998) and IEO database). Detailed diet matrix can be found in Section S4, Table S7.

## Blue whiting

645 The model was initialized with a biomass of  $1.97 \text{ t km}^{-2}$  estimated from the DEMERSALES and EVHOE bottom trawl surveys (ICES, 2017d).

Blue whiting's life expectancy is considered 10 years, whilst maturity age 2-7 years (ICES, 2016c). We assumed a maturity age of 2 years for the Bay of Biscay Atlantis model. Detailed fractions of each age class which is mature can be found in Section S2, Table S3. The maturity age of 2 years corresponds  
650 to a length of 18.2 cm (Froese and Pauly, 2021) and males can reach a total length of 30-35 cm and females 35-40 cm (Silva et al., 1997) when they are adults. This length information together with the general length-weight formula of  $W = 0.00375 \cdot L^{3.082}$  from Froese and Pauly (2021) were used to characterize the weight-at-age distribution. The growth rate for each age class (mgN per day) was then estimated considering the amount of weight each individual needs to gain to reach the weight of the next  
655 age class within a given time window of 1 year. Detailed growth rate per age class can be found in Section S2, Table S4.

The spawning season is considered to be from March to April (ICES, 2016c). No information about recruitment was found for blue whiting in the area, hence, we assumed that the recruitment parameters for this group are those set in the SE-Australian Atlantis model (Fulton et al., 2004).

660 Natural mortality for blue whiting is fixed to 0.2 per year for all age groups (ICES, 2016c). Considering the guidelines from (Audzijonyte et al., 2017), we therefore assumed mortality rates of  $2.7395 \cdot 10^{-12}$  and  $5.479 \cdot 10^{-14}$  per day for juveniles and adults, respectively.

The highest concentration of blue whiting is found at depths ranging between 300-600 m (ICES, 2016c), swimming at a speed of around  $0.8 \text{ m s}^{-1}$  (Hansen et al., 2016). Detailed vertical distribution can  
665 be found in Section S3, Table S6. The horizontal distribution was characterized with information from DEMERSALES and EVHOE bottom trawl surveys (ICES, 2017d). Detailed horizontal distribution can be found in Section S3, Fig. S1.

Macrozooplankton is the main resource of food of both juvenile and adult blue whiting, being this planktonic group around 45 % of the total diet (Cabral and Murta (2002) and IEO database). The adult

670 blue whiting feed on almost all pelagic fishes, whilst juveniles do not feed on large pelagic fishes (pers. comm. Xavier Corrales). Detailed diet matrix can be found in Section S4, Table S7.

## Seabass

The seabass was initialized with a biomass of  $0.17 \text{ t km}^{-2}$  estimated from the DEMERSALES and EVHOE bottom trawl surveys (ICES, 2017d).

675 The maximum observed age in the northern seabass stock was 26-28 years (ICES, 2018a) and the maturity age around 4-7 years, which corresponds to a 35 cm length for males and 42 cm for females (ICES, 2013), reaching 85 cm in the last age of life (Ravard et al., 2014). We therefore assumed a longevity of 28 years and a maturity age of 4 years. The detailed proportion of mature per age was obtained from (ICES, 2018a), described in detail in Section S2, Table S3. The length information  
680 mentioned together with the general length-weight formula of  $W = 0.01248 \cdot L^{2.9485}$  from Ravard et al. (2014) were used to determine the weight-at-age distribution, assuming a linear growth in length per age. The growth rate for each age class (mgN per day) was estimated considering the amount of weight each individual needs to gain to reach the weight of the next age class within a given time window of 3 years. Detailed growth rate per age class can be found in Section S2, Table S4.

685 The spawning season moves later in the year in northern latitudes, being in the Bay of Biscay from January to March (ICES, 2013). Regarding the recruitment information, the larval stage was set at 46 days (Froese and Pauly, 2021) and the length of time recruits arrive over was that set in the SE-Australian Atlantis model (Fulton et al., 2004).

The estimation of the natural mortality was conducted after performing a sensitivity analysis of the  
690 effect of different M values on the assessment of the Bay of Biscay seabass stock, finally setting a natural mortality at 0.24 per year (ICES, 2018a). Following the guidelines from Audzijonyte et al. (2017), mortality rates of  $6.575 \cdot 10^{-12}$  and  $6.575 \cdot 10^{-08}$  per day for juveniles and adults, respectively, were assumed for the Bay of Biscay Atlantis model.

They are found along 10-100 m depth (Froese and Pauly, 2021), swimming at around  $0.6 \text{ m s}^{-1}$   
695 (Claireaux et al., 2006). Detailed vertical distribution can be found in Section S3, Table S6. The horizontal distribution was characterized using the information from DEMERSALES and EVHOE bottom trawl surveys (ICES, 2017d). Detailed horizontal distribution can be found in Section S3, Fig. S1.

The diet of the adult seabass is composed by almost all pelagic and demersal groups, and also cephalopods and decapods, although it consists mainly of mackerel and horse mackerel (Spitz et al., 700 2013). The juveniles, however, do not feed on large and medium demersal fishes (pers. comm. Xavier Corrales). Detailed diet matrix can be found in Section S4, Table S7.

## Anglerfish

The anglerfish group is composed by blackbellied angler (*Lophius budegassa*) and angler (*Lophius piscatorius*). However, the group was parameterized based upon angler (*Lophius piscatorius*) as it is the 705 most abundant species of DEMERSALES and EVHOE bottom trawl surveys (ICES, 2017d). The group was initialized with a biomass of 0.21 t km<sup>-2</sup> estimated from the DEMERSALES and EVHOE bottom trawl (ICES, 2017d).

The maximum observed age for anglers was 20 years (ICES, 2018c). Based on estimates from Ireland, 100 % of individuals are mature at ages 5 (ICES, 2018c). We therefore assumed a maturity age 710 of % years. The maturity percentage per age was based on Duarte et al. (2001), which can be found in detailed in Section S2, Table S3. The weight distribution was characterized considering the mean length-at-age information for females and males from Landa et al. (2001) and the general length-weight formula of  $W = 0.02457 \cdot L^{2.5612}$  from Ravard et al. (2014). The growth rate for each age class (mgN per day) was estimated taking into account the amount of weight each individual needs to gain to reach the weight of 715 the next age class within a given time window of 2 years. Detailed growth rate per age class can be found in Section S2, Table S4.

The spawning occurs between January and June (Duarte et al., 2001). No information on recruitment was available, therefore, we assumed that the recruitment parameters for this group are those set in the SE-Australian Atlantis model (Fulton et al., 2004).

720 Then et al. (2015) estimated a natural mortality of 0.315 per year based on the maximum observed age. However, the observation error around this estimate was considerable (ICES, 2018c). In consequence, after considering the growth, the age-at-first maturity and the lifestyle of the angler, a natural mortality of 0.25 per year was assumed by WKAnglerfish (ICES, 2018d). We therefore assumed a natural mortality of 0.25 per year. Taking into consideration the guidelines from Audzijonyte et al.

725 (2017) mortality rates of  $3.082 \cdot 10^{-09}$  and  $6.164 \cdot 10^{-08}$  per day for juveniles and adults, respectively, were assumed for the Bay of Biscay Atlantis model.

Anglers are most abundant at depths of 200-800 m along the southern Celtic Seas and the Bay of Biscay (ICES, 2018c) and from the surface up to at least 1000 m along the Cantabrian Sea and Atlantic Iberian waters (ICES, 2018e). We therefore assumed a depth range of 0-1000 m. Detailed vertical  
730 distribution can be found in Section S3, Table S6. The anglers swim at a speed of  $0.24BL/s$ , BL meaning body length (Wikipedia, 2018). Considering the common body length of 100 cm established by Froese and Pauly (2021), we assumed that angler swim at a speed of  $0.24 \text{ m s}^{-1}$ . The horizontal distribution was characterized based on the information from DEMERSALES and EVHOE bottom trawls surveys (ICES, 2017d). Detailed horizontal distribution can be found in Section S3, Fig. S1.

735 The adult anglerfish feed on some elasmobranch groups, other planktivorous fishes, juvenile hake, cods, megrim, large and small demersal fishes, deep-sea fishes, cephalopods, zooplankton feeding shrimps and decapods, but mainly on mackerel, horse mackerel, blue whiting and common sole (Preciado et al. (2006) and IEO database). The juveniles, however, do not prey on elasmobranch nor large demersal and deep-sea fishes, but prey more on invertebrates (pers. comm. Xavier Corrales). Detailed diet matrix  
740 can be found in Section S4, Table S7.

### Mesopelagic fishes

The mesopelagic fishes group is composed by different lantern fish, although it was parameterized based upon jewel lanternfish (*Lampanyctus crocodilus*) as it is the most abundant specie of DEMERSALES and EVHOE bottom trawl surveys (ICES, 2017d). It was initialized with a biomass of  
745  $1.80 \text{ t km}^{-2}$  obtained from EwE (Corrales et al., 2022).

Due to difficulties in gathering information about longevity and maturity age of jewel lanternfish in the Bay of Biscay, other areas or species information were searched. In the Ionian Sea the maximum age identified of jewel lanternfish was 8 years (Sion et al., 2011), so therefore we assumed a longevity of 8 years for the Bay of Biscay Atlantis model. They can reach a length of 30 cm, although the length range  
750 in the Balearic Island is established from 9 cm to 21 cm (Froese and Pauly, 2021). The maturity age was assumed to be 1 year, the age at which half-naked hatchetfish (Froese and Pauly, 2021), glacier lanternfish (Froese and Pauly, 2021) and silvery lightfish (Rosland and Giske, 1997) mature. Detailed fractions of



each age class which is mature can be found in Section S2, Table S3. The weight-at-age distribution was characterized using the general length-weight formula of  $W = 0.0017 \cdot L^{3.431}$  from Bayhan et al. (2020) and assuming a linear increase in the length per age. The growth rate for each age class (mgN per day) was calculated based on the amount of weight each individual needs to gain to reach the weight of the next age class within a given time window of 1 year. Detailed growth rate per age class can be found in Section S2, Table S4.

The spawning of jewel lanternfish occurs in March-August in France, along the Mediterranean Sea, and in September-November in Portugal (Froese and Pauly, 2021), so a spawning period of March-August was assumed. The recruitment parameters were assumed to be those from the SE-Australian Atlantis model (Fulton et al., 2004).

The mortality rates were assumed to be those set in the NoBa Atlantis model (Hansen et al., 2016),  $6.25 \cdot 10^{-20}$  and  $1 \cdot 10^{-17}$  per day for juveniles and adults, respectively.

Lanternfish are found around 275-1000 m depth (Froese and Pauly, 2021), hence, we assumed a depth range of 200-1000 m. Detailed vertical distribution can be found in Section S3, Table S6. We assumed a swimming speed of  $15 \text{ m s}^{-1}$ , the swimming speed established for silvery lightfish (*Maurolicus muelleri*) and glacier lantern fish (*Benthoosema glaciale*) (Torgersen and Kaartvedt, 2001). The horizontal distribution was characterized according to the information from the DEMERSAL and EVHOE bottom trawl surveys (ICES, 2017d). Detailed horizontal distribution can be found in Section S3, Fig. S1.

The adult mesopelagic fishes diet consists of mesopelagic fishes, polychaetes, other invertebrates, gelatinous zooplankton, macrozooplankton, mesozooplankton and microzooplankton (Bernal et al., 2013; Bernal et al., 2015; Fanelli et al., 2014; Sever et al., 2013). Juveniles however do not feed on mesopelagic fishes (pers. comm. Xavier Corrales). Detailed diet matrix can be found in Section S4, Table S7.

## 775 **Other planktivorous fish**

The other planktivorous fish group was parameterized based upon boarfish (*Capros aper*), the most abundant species of the DEMERSALES and EVHOE bottom trawl surveys (ICES, 2017d). The group was initialized with a total biomass  $1.15 \text{ t km}^{-2}$  estimated from the PELGAS and PELACUS acoustic surveys (Masse et al., 2018).

780 Boarfish's maximum age and the age at which 50 % of individuals become mature are considered 31  
and 3.5 years, respectively (ICES, 2014b). The proportion of maturity was defined based on the  
information from the ICES (2014b). Detailed fractions of each age class which is mature can be found in  
Section S2, Table S3. The weight-at-age distribution was characterized through the total body weight-at-  
age from White et al. (2010). The length-weight relationship was defined with the general formula of  $W$   
785  $= 0.0305 \cdot L^{2.791}$  from Froese and Pauly (2021). The growth rate for each age class (mgN per day) was then  
estimated based on the amount of weight each individual needs to gain to reach the weight of the next age  
class within a given time window of 3 years. Detailed growth rate per age class can be found in Section  
S2, Table S4.

The spawning occurs between June and July in the Northeast Atlantic (ICES, 2014b). Given that  
790 there was no information about recruitment available, we assumed that the recruitment parameters for this  
group are those set in the SE-Australian Atlantis model (Fulton et al., 2004).

The natural mortality is fixed to 0.16 per year (ICES, 2014b). Consequently and following the  
guidelines from Audzijonyte et al. (2017), mortality rates of  $2.192 \cdot 10^{-12}$  and  $4.384 \cdot 10^{-08}$  per day for  
juveniles and adults, respectively, were assumed.

795 The boarfish are widely distributed from the surface up to 600 m (ICES, 2014b). However, other  
species included in the group such as argentine (*Argentina sphyraena*) and silvery pout (*Gadiculus*  
*argenteus*) are found deeper, at 700 m and 1000 m respectively. We therefore assumed a depth range of  
0-1000 m for the group as a whole. Detailed vertical distribution can be found in Section S3, Table S6. It  
was not possible to find swimming speed for boarfish, but for Atlantic herring (*Clupea harengus*) and  
800 European sprat (*Sprattus sprattus*), two of the species that compose the planktivorous fishes group.  
Atlantic herring swim at a speed of around  $0.64 \text{ m s}^{-1}$  (Røttingen and Røttingen, 1991) and European sprat  
at  $0.63 \text{ m s}^{-1}$  (Froese and Pauly, 2021). Therefore, a swimming speed of around  $0.64 \text{ m s}^{-1}$  was assumed  
for this group. The DEMERSALES and EVHOE bottom trawl surveys (ICES, 2017d) supplied  
information to characterize the horizontal distribution. Detailed horizontal distribution can be found in  
805 Section S3, Fig. S1.

The diet of planktivorous fishes consists mainly of mesozooplankton (around 70 % of the diet)  
(Bachiller, 2013; Bachiller and Irigoien, 2015; Doherty and McCarthy, 2004; Lankov et al., 2010; Lopes  
et al., 2006; Maitland and Lyle, 2005; Rice, 1963; Santos and Borges, 2001; Skóra et al., 2012), although

juveniles planktivorous fish do not feed on vertebrates (pers. comm. Xavier Corrales). Detailed diet matrix  
810 can be found in Section S4, Table S7.

## **Anchovy**

The anchovies were initialized with a biomass of  $0.51 \text{ t km}^{-2}$  estimated from the ICES (2019b) report.

Anchovy's life expectancy hardly exceeds three years. They grow very fast during the first year, doubling its weight from first to second year of life, reaching at the end of his life on average 18 cm  
815 (ICES, 2010c). Many authors have suggested that the anchovy matures at age 1 (Cort et al., 1976; Furnestin, 1945; Lucio and Uriarte, 1990) with a size of 11 cm for males and 11.5 cm for females (ICES, 2010c). Detailed fractions of each age class which is mature can be found in Section S2, Table S3. The weight-at-age distribution was characterized considering the mean weight-at-age in the catches in the ICES 8 subarea (ICES, 2010b). The length-weight relationship was defined with the general formula of  
820  $W = 0.007 \cdot L^{3.017}$  from the ICES (2010c) report. The growth rate for each age class (mgN per day) was then calculated based on the amount of weight each individual needs to gain to reach the weight of the next age class within a given time window of 1 year. Detailed growth rate per age class can be found in Section S2, Table S4.

The spawning season on the Bay of Biscay takes place between April and July (ICES, 2010c), with  
825 a larval stage duration of 37 days (Froese and Pauly, 2021). The information about the length of time recruits arrive over was assumed to be this set in the SE-Australian Atlantis model (Fulton et al., 2004).

The natural mortality is fixed at 1.2 per year, although the working group consider that some results presented about the increase of the mortality with age demand a revision of the natural mortality (ICES, 2010b). We therefore assumed mortality rates of  $1.644 \cdot 10^{-11}$  and  $3.288 \cdot 10^{-07}$  per day for juveniles and  
830 adults, respectively, taking into consideration the guidelines from Audzijonyte et al. (2017).

The juvenile anchovies are located in the first 45 m (Boyra et al., 2013), whereas adults can be found at around 100 m (Massé, 1996). Detailed vertical distribution can be found in Section S3, Table S6. No swimming speed information was found for this group, therefore, we assumed a swimming speed of  $1.345 \text{ m s}^{-1}$ , the same swimming speed as herrings (Brawn, 1960). The horizontal distribution was characterized  
835 based on the egg distribution from the BIOMAN survey for 2018 (pers. comm. Maria Santos). Detailed horizontal distribution can be found in Section S3, Fig. S1.

The adult anchovies prey on macrozooplankton, mesozooplankton, microzooplankton, large phytoplankton, small phytoplankton (Bachiller, 2013; Bachiller and Irigoien, 2015; Plounevez and Champalbert, 1999), while the juveniles feed less on microzooplankton and more on mesozooplankton and phytoplankton (pers. comm. Xavier Corrales). Detailed diet matrix can be found in Section S4, Table S7.

## Sardine

The sardines were initialized with a biomass  $1.72 \text{ t km}^{-2}$  biomass estimated from the PELGAS and PELACUS acoustic surveys (Masse et al., 2018).

Whitin European Atlantic waters, sardine attains age below 10 years and a total length lower than 23 cm (ICES, 2017a). Most sardines are mature by their first year of life (ICES, 2017c, a), and all individuals reach sexual maturity by age 2 (ICES, 2017a). The ICES (2010b) report served to obtain the fraction of maturity per age for the Cantabrian Sea in 2009. Detailed fractions of each age class which is mature can be found in Section S2, Table S3. The weight-at-age distribution was defined using mean weight-at-age values from (ICES, 2010b). The length-weight relationship was characterized with the general formula of  $W = 0.00594 \cdot L^{3.77}$  from Froese and Pauly (2021). The growth rate for each age class (mgN per day) was defined based on the amount of weight each individual needs to gain to reach the weight of the next age class within a given time window of 1 year. Detailed growth rate per age class can be found in Section S2, Table S4.

The sardine spawns during spring (Certain et al., 2008), more precisely from March to end-April (Froese and Pauly, 2021), with a 40 days larval stage (Froese and Pauly, 2021). Information about length of time recruits arrive over was not available, hence, the recruitment parameters for sardines are those set in the SE-Australian Atlantis model (Fulton et al., 2004).

The mortality rate of  $2.297 \cdot 10^{-07}$  and  $1.142 \cdot 10^{-07}$  for juveniles and adults, respectively, were defined based on age specific natural mortality for ICES 8c (ICES, 2017a) and 8abd (ICES, 2017c) subareas, and following the guidelines from Audzijonyte et al. (2017).

The distribution of this species is restricted to the coastal shelf, mainly at depths up to 150 m (ICES, 2017a). Detailed vertical distribution can be found in Section S3, Table S6. No swimming speed information was found for this group, therefore, we assumed a swimming speed of  $1.345 \text{ m s}^{-1}$ , the same

865 swimming speed as herrings (Brawn, 1960). The horizontal distribution was characterized based on the egg distribution from the BIOMAN survey for 2018 (pers. comm. Maria Santos). Detailed horizontal distribution can be found in Section S3, Fig. S1.

The adult sardines feed on gelatinous zooplankton, macrozooplankton, mesozooplankton, large phytoplankton and small phytoplankton (Bachiller, 2013; Bachiller and Irigoien, 2015; Cunha et al., 870 2005), whereas juveniles prey on less gelatinous zooplankton and large zooplankton, but more mesozooplankton and phytoplankton (pers. comm. Xavier Corrales). Detailed diet matrix can be found in Section S4, Table S7.

### Horse mackerel

The horse mackerel fish group is composed of Mediterranean horse mackerel (*Trachurus mediterraneus*) and Atlantic horse mackerel (*Trachurus trachurus*). However, based on the most 875 abundant horse mackerel specie of DEMERSALES and EVHOE bottom trawl surveys (ICES, 2017d), the group was parameterized as Atlantic horse mackerel. The model was initialized with a biomass of 2.39 t km<sup>-2</sup> estimated from the PELGAS and PELACUS acoustic surveys (Masse et al., 2018).

The maximum age and length reported for this species are 20 years (ICES, 2017f) and 50 cm, the 880 maximum length obtained in the EVHOE survey (Ravard et al., 2014). At age 0, Atlantic horse mackerel's length is below 14 cm, and up to 18 cm at age 1 (Villamor et al., 1997). At age 3.5 (ICES, 2017f) and around 21.5 cm (Villamor et al., 1997), 50 % are mature (ICES, 2017f). Detailed fractions of each age class which is mature can be found in Section S2, Table S3. The weight-at-age distribution was described taking into consideration the length information mentioned above and the general length-weight formula 885 of  $W = 0.00733 \cdot L^{3.02544}$  from Ravard et al. (2014), the weight-at-age distribution was described. The growth rate for each age class (mgN per day) was then defined based on the amount of weight each individual needs to gain to reach the weight of the next age class within a given time window of 2 years. Detailed growth rate per age class can be found in Section S2, Table S4.

The spawning period in the Bay of Biscay is not clear, different spawning seasons can be found in 890 different publications, but it is known to have a longer spawning period in the Bay of Biscay than in the North Sea (Abaunza et al., 2003). Letaconnoux (1951) mentioned the peak of spawning to be in May-June, whereas Arbault and Lacroix-Boutin (1969) stated that spawning preferentially takes place in the

spring. Nazarov and Dobrusin (1977) referred to the spawning period from December to June. Finally, Lucio and Martin (1989) reported that horse mackerel appear in higher frequency between March and August. In the Northern coast of Spain, Letaconnoux (1951) revealed the spawning season to occur between February and April, whereas Anadón (1960) stated to be from February to May, and Solá (1990) between February and December, although this last mentioned the main spawning period from April to June. Considering the different spawning seasons in the Bay of Biscay and in the Northern coast of Spain, a spawning period from February to August was assumed. There was no recruitment information available, hence, the recruitment parameters were assumed to be those set in the SE-Australian Atlantis model (Fulton et al., 2004).

The natural mortality is uncertain, although ICES currently applies a mortality of 0.15 per year (ICES, 2017f). Consequently and following the guidelines from Audzijonyte et al. (2017), mortality rates of  $2.055 \cdot 10^{-12}$  and  $4.11 \cdot 10^{-08}$  per day for juveniles and adults, respectively, were assumed.

This benthopelagic species is usually found in 100-200 m, although it has been reported 1050 m (Froese and Pauly, 2021). However, as Mediterranean horse mackerel stays in shallower waters (Froese and Pauly, 2021), a depth range of 0-250 m was assumed for the group as a whole. Detailed vertical distribution can be found in Section S3, Table S6. There was no swimming information available for horse mackerel in the Bay of Biscay, therefore, the same swimming speed as the mackerel group was assumed. The horizontal distribution was characterized based on the information from DEMERSALES and EVHOE bottom trawl surveys (ICES, 2017d). Detailed horizontal distribution can be found in Section S3, Fig. S1.

The diet of adult horse mackerel is composed of some pelagic and demersal fishes, and almost all the invertebrate groups, mainly suprabenthos, macrozooplankton and mesozooplankton (Bachiller, 2013; Bachiller and Irigoien, 2015; Garrido and Murta, 2011; Olaso-Toca et al., 1999). The juveniles prey on invertebrates, mostly zooplankton (pers. comm. Xavier Corrales). Detailed diet matrix can be found in Section S4, Table S7.

## **Mackerel**

In the mackerel fish group, Atlantic chub mackerel (*Scomber colias*) and Atlantic mackerel (*Scomber scombrus*) were included. However, the group was parameterized as Atlantic mackerel, as this is the most

abundant species of the DEMERSALES and EVHOE bottom trawl surveys (ICES, 2017d). It was initialized with a biomass of  $2.05 \text{ t km}^{-2}$  obtained from the TRIENAL acoustic survey (ICES, 2019a).

The Atlantic mackerel can live for over 20 years, maturing at 2-3 years (Jansen and Gislason, 2013). Detailed fractions of each age class which is mature can be found in Section S2, Table S3. The weight-at-age was defined based on the mean weight-at-age information from ICES (2017e). The general length-weight formula of  $W = 0.0032 \cdot L^{3.2695}$  from Costa et al. (2017) was used. The growth rate for each age class (mgN per day) was then calculated based on the amount of weight each individual needs to gain to reach the weight of the next age class within a given time window of 2 years. Detailed growth rate per age class can be found in Section S2, Table S4.

In the Northeast Atlantic, mackerel spawning starts in the Iberian Peninsula waters in January/February and ends in the North Sea in July. In the spawning area from Spanish and Portuguese waters, spawning starts in January and ends in March (ICES, 2017g). After spawning, most of them migrate in a northerly direction along the west of Ireland and north of Scotland to feed in autumn in the northern North Sea and Norwegian Sea and overwinter along the north of Ireland and Scotland, coming back towards the spring spawning grounds (Uriarte and Lucio, 2001). Based on this information, mackerel's spawning season was assumed from January to March, starting the migration towards the north in April and coming back to the model domain around December. The larval stage lasts 40 days (Froese and Pauly, 2021), and the length of time recruits arrive over was assumed to be this set in the SE-Australian Atlantis model (Fulton et al., 2004).

The natural mortality was set at 0.15 per year, a fixed value for decades (ICES, 2017g). Consequently and following the guidelines from Audzijonyte et al. (2017), mortality rates of  $2.055 \cdot 10^{-12}$  and  $4.11 \cdot 10^{-08}$  per day for juveniles and adults, respectively, were assumed.

During the 2009 blue whiting spawning stock surveys, large amount of mackerel were observed throughout the spawning ground, ranging from 60 to 300 meters (ICES, 2016c) and swimming at around  $2 \text{ m s}^{-1}$  (Jansen and Gislason, 2013). Detailed vertical distribution can be found in Section S3, Table S6. The horizontal distribution was defined using the information from DEMERSALES and EVHOE bottom trawl surveys (ICES, 2017d). Detailed horizontal distribution can be found in Section S3, Fig. S1.

The adult mackerel's diet consists mainly of blue whiting, supra benthos and macro zooplankton (Bachiller (2013); Bachiller and Irigoien (2015); Olaso, Ignacio et al. (2005) and IEO database). Juvenile

950 mackerel, has a larger fraction of invertebrates in their diet (pers. comm. Xavier Corrales). Detailed diet matrix can be found in Section S4, Table S7.

### Other large pelagic fishes

The other large pelagic fishes group was parameterized based upon Atlantic bonito (*Sarda sarda*), the most abundant species of DEMERSALES and EVHOE bottom trawl surveys (ICES, 2017d). It was  
955 initialized with a biomass of  $0.14 \text{ t km}^{-2}$  obtained from EwE (Corrales et al., 2022).

The age determination has been studied by means of different methodologies, establishing finally a maximum age of 5 years (ICCAT, 2006-2016a). They mature at age 1, when they have a length of 37 cm (Froese and Pauly, 2021). Detailed fractions of each age class which is mature can be found in Section S2, Table S3. Atlantic bonito is a small tuna specie, with a common fork length of 50 cm and about 2 kg,  
960 reaching a maximum fork length of 91.4 cm and 5.4 kg (ICCAT, 2006-2016a). The common weight and the length-at-maturity together with the general length-weight formula of  $W = 0.00724 \cdot L^{3.1644}$  from ICCAT (2006-2016a) were used to defined the weight-at-age distribution, assuming a linear increase in weight. The growth rate for each age class (mgN per day) was calculated based on the amount of weight each individual needs to gain to reach the weight of the next age class within a given time window of 1  
965 year. Detailed growth rate per age class can be found in Section S2, Table S4.

The spawning season information was found for the Mediterranean, which occurs from May to July (ICCAT, 2006-2016a). The recruitment parameters are those set in the SE-Australian Atlantis model (Fulton et al., 2004).

The Atlantic bonito swims at a speed of  $0.35 \text{ m s}^{-1}$  along the 80-200 m depth (Froese and Pauly,  
970 2021). To take into consideration the depth distribution of all the species included in the group, a depth range of 0-200 m was assumed for the group as a whole. Detailed vertical distribution can be found in Section S3, Table S6. The horizontal distribution was defined taking advantage of the information from DEMERSALES and EVHOE bottom trawl surveys (ICES, 2017d). Detailed horizontal distribution can be found in Section S3, Fig. S1.

975 The diet of the adults of this group consists mainly of horse, sardine, anchovy, other planktivorous fishes and microzooplankton (Dhieb et al., 2001; Dorman, 1988; Navarro et al., 2017; Sever et al., 2009; Varela et al., 2019). Among the changes in the diet of juveniles is the cease of horse mackerel as one of



the main sources of food (pers. comm. Xavier Corrales). Detailed diet matrix can be found in Section S4, Table S7.

## 980 **Albacore**

The albacore was initialized with a biomass of 2.03 t km<sup>-2</sup> (ICCAT, 2016).

Le Gall (1974) estimates a longevity of 15 years. However, tagging experiments have shown that the oldest albacore ever recovered was less than 10 years old (ICCAT, 2006-2016b). Therefore, a maximum age of 10 years was assumed. Juvenile albacores are found during the summer in tropical surface waters, 985 where they grow very quickly reaching around 20 cm at an age of 6 months (Nikolic et al., 2016). In general, there is a lack of exhaustive studies on Atlantic albacore sexual maturity (ICCAT, 2006-2016b). In the model assumptions, 50 % of north and south albacore are mature at age of 5 years, measuring around 90 cm (ICCAT, 2006-2016b; Nikolic et al., 2016), reaching up to 140 cm and 60 kg in weight as adults (Nikolic et al., 2016). The precise fraction of maturity per age class was defined based on ICCAT 990 (2006-2016b), defined in detailed in Section S2, Table S3. The length information mentioned together with the general length-weight formula of  $W = 0.0438 \cdot L^{2.825}$  from Nikolic et al. (2016) were used to defined weight-at-age distribution. The growth rate for each age class (mgN per day) was set based on the amount of weight each individual needs to gain to reach the weight of the next age class within a given time window of 1 year. Detailed growth rate per age class can be found in Section S2, Table S4.

995 In the North Atlantic, spawning takes place between April and September (Nikolic et al., 2016). No information was found on recruitment, therefore the recruitment parameters are from the SE-Australian Atlantis model (Fulton et al., 2004).

The natural mortality is assumed to be 0.3 per year for all year classes (ICCAT, 2006-2016b). Therefore, for the Bay of Biscay Atlantis model mortality rates of  $8.219 \cdot 10^{-08}$  per day for both juveniles 1000 and adults, were defined.

Its depth distribution in general is relatively shallow, being 95% of the time within the upper 50 m, although sometimes it can be found within the upper 100 m (Goñi et al., 2011b). For this reason, a depth range of 0-100 m was assumed. Detailed vertical distribution can be found in Section S3, Table S6. Along this depth range, juveniles are known to swim faster than adults, at 0.57 m s<sup>-1</sup> whereas adults swim at 0.45

1005 cm s<sup>-1</sup> (ICCAT, 2006-2016b). The horizontal distribution was established based on the box proportion of the total area. Detailed horizontal distribution can be found in Section S3, Fig. S1.

Adult albacore feeds on mackerel, horse mackerel, sardine, anchovy, other planktivorous fishes, mesopelagic fishes, blue whiting, squids, pelagic crab, zooplankton feeding shrimps, gelatinous zooplankton, macrozooplankton, mesozooplankton (Goñi et al., 2011a; Pusineri et al., 2005). The  
1010 juvenile's diet, however, feed less on vertebrates and more on invertebrates (pers. comm. Xavier Corrales). Detailed diet matrix can be found in Section S4, Table S7.

Juveniles and immature albacore seem to be mostly distributed in the Northeast Atlantic during summer, and in the central and southwest Atlantic during winter (Nikolic et al., 2016). When albacore reach maturity, this pattern changes. After this age, albacore migrate from the northeast of the North  
1015 Atlantic to tropical waters of the southwest of the North Atlantic, and they remain in this region until they completely mature and then spawn. Then they follow an annual migration following warm water, from the south to the north in January until September, returning to the south (Nikolic et al., 2016). The juveniles were thus assumed to enter the model domain in May and leave in mid-October, whereas adults were assumed to stay outside the model domain the whole year (pers. comm. Eider Andonegi). Taking  
1020 into account the way migration is defined in Atlantis, adults were specified to come in, spawn and leave the same day (pers. comm. Beth Fulton).

## **Bluefin tuna**

The bluefin tuna was initialized with a biomass of 0.10 t km<sup>-2</sup> (ICCAT, 2017).

Bluefin tuna's lifespan, maturity age and weight-at-age distribution were defined based on  
1025 information from ICCAT (2006-2016c). Bluefin tuna adults grow at a slower rate than juveniles, but their weight grows faster. They measure about 30-40 cm long and weight about 1kg when hatching, reaching 60 cm long and about 4kg after one year. The first age-at-maturity is established at age 3, weighting 20 kg. Detailed fractions of each age class which is mature can be found in Section S2, Table S3, which were defined based on the values from ICCAT (2017). At 10 years, an individual bluefin tuna measures  
1030 approximately 200 cm and weighs 150 kg, at 20 years old reaching in average 300 cm and 400 kg. We therefore assumed a maximum lifespan of 20 years and a maturity age of 3 years. The weight-at-age distribution was defined based on the age-weight distribution for East Atlantis published by ICCAT

(2006-2016c). Although length-weight parameters were suggested in the ICCAT manual (ICCAT, 2006-2016c), this parameters were considered low comparing with the length-weight parameters of the fish groups from the SE-Australian Atlantis model (Fulton et al., 2004). We therefore used the length-weight parameters from Froese and Pauly (2021) obtaining the general formula of  $W = 0.013 \cdot L^{3.01}$ . The growth rate for each age class (mgN per day) was calculated based on the amount of weight each individual needs to gain to reach the weight of the next age class within a given time window of 2 years. Detailed growth rate per age class can be found in Section S2, Table S4.

In east Atlantic and east Mediterranean, bluefin tuna spawn from May to mid-June (ICCAT, 2017), and the larval stage duration is set at 28 days (Froese and Pauly, 2021). The length of time recruits arrive over was assumed to be this set in the SE-Australian Atlantis model (Fulton et al., 2004).

The mortality rates for juveniles and adults were calculated based on mortality-at-age rates from ICCAT (2017), being  $9.041 \cdot 10^{-08}$  and  $3.79 \cdot 10^{-08}$  the mortality rates for juveniles and adults, respectively.

From June to October bluefin tuna is concentrated between 0-30 m and restricted to 50 m overall, while from December to March, the depth range expand to 100-125 m (Arregui et al., 2018). For this reason, a 0-125 m depth range was assumed. Detailed vertical distribution can be found in Section S3, Table S6. They swim at a speed of around  $3 \text{ m s}^{-1}$  (Froese and Pauly, 2021). The horizontal distribution was defined based on the box proportion of the total area. Detailed horizontal distribution can be found in Section S3, Fig. S1.

The diet of adult bluefin tuna consists mainly of horse mackerel, sardine and anchovy (De la Serna et al., 2012; Logan et al., 2011; Varela et al., 2014; Varela et al., 2019). The juveniles, however, do not feed on adult large pelagic fishes (pers. comm. Xavier Corrales). Detailed diet matrix can be found in Section S4, Table S7.

The Bay of Biscay has been revealed as important summer feeding area for juveniles, as well as an overwintering area for an unexpected proportion of this population (Arregui et al., 2018). For this reason, juveniles were assumed to enter the Bay of Biscay area in May and leave in October (pers. comm. Eider Andonegi). Among adults, a few were documented to enter the Bay of Biscay during the period after spawning migration out of the Mediterranean (Arregui et al., 2018). In consequence, adults were assumed to stay out the whole year (pers. comm. Eider Andonegi). However, Atlantis is modelled in a way that a

species can be sent away for one day (Audzijonyte et al. (2017); pers. comm. Beth Fulton). We therefore assumed that adults come in for spawning and leave the same day.

## Skates and rays

Skates and rays was parameterized as thornback ray (*Raja clavata*), as it is the most abundant species of DEMERSALES and EVHOE bottom trawl surveys (ICES, 2017d). It was initialized with a biomass of 0.17 t km<sup>-2</sup> obtained from DEMERSALES and EVHOE bottom trawl surveys (ICES, 2017d).

Thornback ray's maximum age was set at 10 years and a maturity age at 5.6 years (Garcia et al., 2008). Detailed fractions of each age class which is mature can be found in Section S2, Table S3. The weight distribution was defined based on the general length-weight formula of  $W = 0.0045 \cdot L^{3.0686}$  (ICES, 2018f) and the estimates of length-at-age published by Serra-Pereira et al. (2008). Once the weight-at-age distribution was defined, the growth rate for each age class (mgN per day) was calculated based on the amount of weight each individual needs to gain to reach the weight of the next age class within a given time window of 1 year. Detailed growth rate per age class can be found in Section S2, Table S4.

Since no spawning information was found for Bay of Biscay, spawning information from the Gulf of Gabès, south-central Mediterranean Sea, was used. In Gulf of Gabès, actively spawning females occur throughout the year, although the spawning fraction is highest between May and September (Kadri et al., 2014). We therefore assumed spawning period from May to September for the Bay of Biscay Atlantis model. The recruitment parameters were assumed to be this set in the SE-Australian Atlantis model (Fulton et al., 2004).

Based on Froese and Pauly (2021), a mortality of 0.19 per year is set for thornback ray. Following the guidelines from Audzijonyte et al. (2017), mortality rates of  $2.602 \cdot 10^{-11}$  and  $5.204 \cdot 10^{-11}$  per day for juveniles and adults, respectively, were assumed for the Bay of Biscay Atlantis model.

Thornback ray is found in Western Galicia at depths ranging from 20 to 400 m, specifically in the sedimentary grounds of the continental shelf, but it is most abundant between 50 and 200 m, particularly near 75 m (ICES, 2014a). Considering the depth ranges of all the skates and rays included in the group, a depth range of 0-300 m was assumed for the group as a whole. Detailed vertical distribution can be found in Section S3, Table S6. Since no swimming speed information was found for the Bay of Biscay, swimming speed information is those set in the SE-Australian Atlantis model (Fulton et al., 2004).

DEMERSALES and EVHOE bottom trawl surveys (ICES, 2017d) served to characterize the horizontal  
1090 distribution. Detailed horizontal distribution can be found in Section S3, Fig. S1.

Adult skates and rays feed on demersal sharks, skates and rays, and on almost all the fish and  
invertebrate species, although Norway lobster is the main source of food (Ajayi (1982); Ellis et al. (1996);  
Morato et al. (2003); Ponte et al. (2016); Valls Mir (2017) and IEO database). Juvenile skates and rays,  
however, do not eat sharks, skates and rays, adult large and medium demersal fishes, but eat more  
1095 invertebrate species (pers. comm. Xavier Corrales). Detailed diet matrix can be found in Section S4, Table  
S7.

### **Deep-water sharks**

This group was characterized as blackmouth catshark (*Galeus melastomus*), the most abundant  
species of DEMERSALES and EVHOE bottom trawl surveys (ICES, 2017d). The group was initialized  
1100 with a biomass of  $0.05 \text{ t km}^{-2}$  obtained from DEMERSALES and EVHOE bottom trawl surveys (ICES,  
2017d).

The maximum longevity for blackmouth catshark in the Northeast Atlantic is established for males,  
at age 8 (Froese and Pauly, 2021). The age of maturity was assumed to be at age 3, the age at which the  
blackmouth catshark mature in the Ionian Sea (Froese and Pauly, 2021). Detailed fractions of each age  
1105 class which is mature can be found in Section S2, Table S3. Males mature between 34 and 42 cm, reaching  
at least 61 cm. Females, however, mature between 39 and 45 cm, and can reach a length of 90 cm (Ebert  
and Stehmann, 2013). Based on this information, a maturity length of 40 cm and a length-at-last age class  
of 55 cm were assumed. This length information together with the general length-weight formula of  $W =$   
 $0.00263 \cdot L^{3.03}$  from Froese and Pauly (2021) were used to characterize the weight distribution per age. The  
1110 growth rate for each age class (mgN per day) was calculated based on the amount of weight each  
individual needs to gain to reach the weight of the next age class within a given time window of 1 year.  
Detailed growth rate per age class can be found in Section S2, Table S4.

The spawning period was obtained for the Ionian Sea, where the individuals apparently reproduce  
from the end of February to September (Froese and Pauly, 2021). The recruitment parameters for this  
1115 group were assumed to be those set in the SE-Australian Atlantis model (Fulton et al., 2004).

Natural mortality information was obtained for birdbeak shark from Irvine et al. (2012). The natural mortality ranges from 0.061 to 0.191 for males and 0.051 to 0.145 for females, therefore, a natural mortality of 0.1128 per year was assumed. With regard to the need of low natural mortality (Audzijonyte et al., 2017), mortality rates of  $1.545 \cdot 10^{-12}$  and  $3.09 \cdot 10^{-08}$  per day for juveniles and adults, respectively, were defined.

The blackmouth catshark is found on the outer continental shelves and upper slopes, mainly between 200 to 500 m, although occasionally can be found up to 55 m and down to 2000 m (Ebert and Stehmann, 2013). Other sharks included in the group are found deeper, such as Portuguese dogfish (*Centroscymnus coelolepis*), 270-3675 m (ICES, 2010a), birdbeak dogfish (*Deania calcea*), 60-1490 m (Ebert and Stehmann, 2013), and knifetooth dogfish (*Scymnodon ringens*), 200-1600 m (Ebert and Stehmann, 2013). We therefore assumed a depth range of 0-3600 m for the group as a whole. Detailed vertical distribution can be found in Section S3, Table S6. No information on swimming speed for blackmouth catshark was found, so swimming speed for Portuguese dogfish was used to initialize the model, which based on Bagley et al. (1994) is set at  $0.1043 \text{ m s}^{-1}$ . The horizontal distribution was characterized using information from DEMERSALES and EVHOE bottom trawl surveys (ICES, 2017d). Detailed horizontal distribution can be found in Section S3, Fig. S1.

This group feeds on almost all fish groups included in the model, although the primary source of food are the blue whiting, deep-sea fishes, benthic cephalopods, zooplankton feeding shrimps, decapods and suprabenthos (Barría et al. (2015); Ellis et al. (1996); Moura et al. (2005); Navarro et al. (2014); Neiva et al. (2006); Preciado et al. (2009) and IEO database). Detailed diet matrix can be found in Section S4, Table S7.

### **Pelagic sharks**

The pelagic shark group was parameterized as blue shark (*Prionace glauca*), the most abundant species in the area (pers. comm. Guzman Diez). It was initialized with a biomass of  $0.06 \text{ t km}^{-2}$  obtained from the EwE model (Corrales et al., 2022), that was estimated using a realistic ecotrophic efficiency of the group (EE). This ecotrophic efficiency indicates the proportion of the production or total mortality that is actually explained in the model (Christensen and Walters, 2004).

The maximum estimated age for blue shark is about 20 years whilst the maturity age for females is between 5 and 7 years, and for males between 4 and 5 years (Ebert and Stehmann, 2013). We therefore  
1145 assumed a maturity age of 4 years. Detailed fractions of each age class which is mature can be found in  
Section S2, Table S3. The weight for each age class was estimated using the length-weight relationship  
together with estimates of length-at-age. The general length-weight formula of  $W = 0.00437 \cdot L^{3.11}$  from  
Froese and Pauly (2021) was used, whereas the lengths are based on those reported at Skomal and  
Natanson (2003). Growth rate for each age class (mgN per day) were calculated based on the amount of  
1150 weight each individual needs to gain to reach the weight of the next age class within a given time window  
of 2 years. Detailed growth rate per age class can be found in Section S2, Table S4.

There was no information of spawning, recruitment nor mortality available for this group in the Bay  
of Biscay. However, in the Indian Ocean, blue shark spawn between March and June (Froese and Pauly,  
2021), so a spawning period of March-June was assumed for the Bay of Biscay Atlantis model. The  
1155 recruitment parameters are those set in the SE-Australian Atlantis model (Fulton et al., 2004). The  
mortality was assumed to be 0.2 per year (pers. comm. Cecilie Hansen), so as a result, mortality rates of  
 $5.479 \cdot 10^{-08}$  and  $2.7395 \cdot 10^{-12}$  per day for juveniles and adults, respectively, was defined in the Bay of  
Biscay Atlantis model.

Blue sharks can forage up to 600 meters deep (Pusineri et al., 2008) and swim a total of 2 km at a  
1160 rate of 0.3 to 0.6 m s<sup>-1</sup> (Klimley et al., 2002). With the aim of taking into consideration the maximum  
depth of all the sharks included in the group, a depth range of 0-700 m was assumed for the group as a  
whole. The vertical and horizontal distribution was described based on each layer proportion of the total  
water column and the box proportion of the total area, respectively. Detailed vertical and horizontal  
distribution can be found in Section S3, Table S6 and Fig. S1, respectively.

1165 The adult pelagic sharks feed mainly on other large pelagic fishes, mackerel, anchovy, other  
planktivorous fishes and medium demersal fishes (Clarke et al., 1996; Joyce et al., 2002; Maia et al.,  
2006; Preti et al., 2008), although in the juvenile pelagic sharks diet, among others, other large pelagic  
and medium demersal adult fishes cannot be found (pers. comm. Xavier Corrales). Detailed diet matrix  
can be found in Section S4, Table S7.

## 1170 Demersal sharks

This group was parameterized based on the most abundant species from DEMERSALES and EVHOE bottom trawl surveys (ICES, 2017d), lesser-spotted catshark (*Scyliorhinus canicula*). It was initialized with a biomass of  $0.13 \text{ t km}^{-2}$  obtained from DEMERSALES and EVHOE bottom trawl surveys (ICES, 2017d).

1175 Initially, the maximum age for lesser-spotted catshark was set at 14.6 years, the maximum time achieved at liberty considering results from tag-recapture data (ICES, 2018f). However, according to the tagging length, the estimated life expectancy of this specie could be at least 20 years (ICES, 2018f). As a result, a longevity of 20 years was assumed. Considering the maximum length of 75 cm observed in the annual bottom trawl surveys carried out by the IEO along the Cantabrian Sea and the von Bertalanffy  
1180 length-at-infinity of 69.3 cm (ICES, 2018f), a 60 cm length-at-last age class was assumed. Rodríguez-Cabello et al. (1998) estimated the maturity age at 7 years from a length-at-maturity of 54.2 cm obtained for this specie and using the von Bertalanffy growth equation derived from tag-recapture data. Detailed fractions of each age class which is mature can be found in Section S2, Table S3. There was no weight information found, so the weight-at-age distribution was characterized using the general length-weight  
1185 formula of  $W = 0.0022 \cdot L^{3.1194}$  from ICES (2018f), and the previous mentioned length-at-maturity and length-at-last age class. The growth rate for each age class (mgN per day) was calculated based on the amount of weight each individual needs to gain to reach the weight of the next age class within a time window of 2 years. Detailed growth rate per age class can be found in Section S2, Table S4.

The spawning can take place almost all year around (Ellis et al., 2009), although in the Languedien  
1190 Coast, France, it takes place from October to August (Froese and Pauly, 2021). Therefore, a spawning period from October to August was assumed for the Bay of Biscay Atlantis model. In the North Atlantic, the gestation period was estimated at five to six months, with a fecundity of 29-62 eggs per year (Ellis et al., 2009). In the Atlantis models the total number of new recruits per individual, not per female, must be specified (Audzijonyte et al., 2017). For this reason, we divided by 2 the number of eggs, assuming a  
1195 fecundity of 15 eggs per individual per year.



No information of mortality was obtained for lesser-spotted catshark. We therefore decided to use mortality rates for picked dogfish defined in NoBa Atlantis model (Hansen et al., 2016),  $3.52 \cdot 10^{-09}$  and  $5.74 \cdot 10^{-10}$  per day for juveniles and adults, respectively.

The lesser-spotted catshark is particularly abundant over sandy, gravelly and muddy bottom in the Cantabrian Sea, at depths ranging from 50 to 500 m, although primarily at depths from 150-300 m (Rodríguez-Cabello et al., 1998). Picked dogfish (*Squalus acanthias*) and lognose spurdog (*Squalus blainville*) are found at depths of 600 m (Ebert and Stehmann, 2013) and 780 m (Froese and Pauly, 2021). We therefore assumed a depth range of 0-700 m for the group as a whole. Detailed vertical distribution can be found in Section S3, Table S6. No information of swimming speed for lesser-spotted catshark was found, but for picked dogfish who swims at a speed of around  $2 \text{ m s}^{-1}$  (Domenici et al., 2004). The horizontal distribution was described using the information collected from the DEMERSALES and EVHOE bottom trawl surveys (ICES, 2017d). Detailed horizontal distribution can be found in Section S3, Fig. S1.

The adult demersal sharks feed on almost all the fish groups included in the model, although the main source of food is blue whiting and decapods (47% of the diet) (Ellis et al. (1996); Olaso, I et al. (2005) and IEO database). Juvenile sharks do not feed on adult sharks and adult medium demersal fishes (pers. comm. Xavier Corrales). Detailed diet matrix can be found in Section S4, Table S7.

### **Toothed cetaceans**

The toothed cetaceans group was parameterized based on bottlenose dolphin (*Tursiops truncatus*), the most abundant specie based on Laran et al. (2017). It was initialized with 20210 cetaceans, which was calculated using information of individuals per  $\text{km}^2$  for 2012 from Pettex et al. (2017) and doing a reconstruction of the time series of the numbers of cetaceans for the period 2004-2016 with Authier et al. (2018); the initial abundance value used corresponded to the year 2004.

The female bottlenose dolphins can live more than 57 years, whereas the males can live up to 48 years, reaching an estimated body weight of around 210 kg (Perrin et al., 2009). Therefore, a maximum longevity of 60 years was assumed. Females reach sexual and physical maturity before males. The age at which they reach sexual maturity varies by region, but females typically reach sexual maturity between the ages of 5 and 13, while male sexual maturity occurs between the ages of 9 and 14 (Perrin et al., 2009).

Consequently, a maturity age of 5 years was assumed. Detailed fractions of each age class which is mature  
1225 can be found in Section S2, Table S3. The estimation of the weight-at-age distribution was based on the  
information of the estimated body weight mentioned above, and calf and mature adult weight data  
provided by Perrin et al. (2009), assuming a linear trend on the weight distribution. The length-weight  
relationship was defined using the general formula of  $W = 0.01 \cdot L^3$  from Girardin et al. (2018). The growth  
rate for each age class (mgN per day) was calculated based on the amount of weight each individual needs  
1230 to gain to reach the weight of the next age class within a time window of 6 years. Detailed growth rate  
per age class can be found in Section S2, Table S4.

No information on spawning and recruitment was found for the Bay of Biscay, hence, these  
parameters were assumed to be those set in the SE-Australian Atlantis model (Fulton et al., 2004).

The natural mortality was assumed to be 0.2 per year (pers. comm. Cecilie Hansen). In consequence,  
1235 converting to daily mortality and implementing the recommendations of Audzijonyte et al. (2017),  
mortality rates of  $5.479 \cdot 10^{-08}$  and  $2.7395 \cdot 10^{-12}$  per day for juveniles and adults, respectively, were  
assumed.

Bottlenose dolphins are found between 100 and 200 m isobaths (Certain et al., 2008), swimming at  
a speed of around  $2 \text{ m s}^{-1}$  (FISH and HUI, 1991). Other cetaceans included in the group have deeper  
1240 vertical distribution, such as long-finned pilot whale (*Globicephala melas*), 0-600 m (Perrin et al., 2009),  
and striped dolphin (*Stenella coeruleoalba*), 200-700 m (Ringelstein et al., 2006). We therefore assumed  
a depth range of 0-700 m for the group as a whole. Detailed vertical distribution can be found in Section  
S3, Table S6. The horizontal distribution was established based on the shelf (depth < 200 m), slope (200  
< depth < 2000 m) and oceanic (depth > 2000 m) strata classification of the area from Laran et al. (2017),  
1245 and assuming a homogeneous distribution upon the boxes of each area. Detailed horizontal distribution  
can be found in Section S3, Fig. S1.

The diet of adult toothed cetaceans consists mainly of sardine, blue whiting, medium demersal fishes  
and cephalopods (De Pierrepont et al., 2005; González et al., 1994; Marçalo et al., 2018; Meynier et al.,  
2008; Santos and Borges, 2001; Santos et al., 2007; Santos et al., 2013; Santos et al., 2008; Spitz et al.,  
1250 2011; Spitz, J. et al., 2006; Spitz, Jérôme et al., 2006). Juvenile toothed cetaceans, however, do not feed  
on medium demersal adult fishes (pers. comm. Xavier Corrales). Detailed diet matrix can be found in  
Section S4, Table S7.

## Baleen whales

The baleen whales group was parameterized based upon fin whale (*Balaenoptera physalus*), as it is the most abundant specie based on Laran et al. (2017). The initial abundance value was 831 whales, which was calculated using information of individuals per km<sup>2</sup> for 2012 from Pettex et al. (2017) and doing a reconstruction of the time series of the numbers of whales for the period 2004-2016 with Authier et al. (2018); the initial abundance value used corresponded to the year 2004.

Fin whale's longevity has not been determined, but individuals of up to 80-90 years old have been identified (Perrin et al., 2009). Based on this information, a maximum longevity of 90 years was assumed. In the Northern Hemisphere, the body mass of adults usually ranges from 40000 to 50000 kg, and the calf weight from 1750 to 1850 kg (Perrin et al., 2009). The sexual maturity is reached at a weight of 30000 kg, which corresponds to a length of approximately 17.5 m in males and 18.5 m in females (Perrin et al., 2009). These lengths are typically associated with ages of 6-7 years in males and 7-8 years in females (Perrin et al., 2009). So, therefore, we assumed a maturity age of 6 years. Detailed fractions of each age class which is mature can be found in Section S2, Table S3. The weight information previously mentioned was used to characterize the weight-at-age distribution, and therefore, the growth rate for each age class (mgN per day) calculated based on the amount of weight each individual needs to gain to reach the weight of the next age class within a time window of 9 years. Detailed growth rate per age class can be found in Section S2, Table S4. The length-weight relationship was estimated with the general formula of  $W = 0.0015 \cdot L^{3.46}$  (Perrin et al., 2009).

Fin whales mate in winter, from December through to February, the gestation lasting about 11 months (Norsk Polarinstitut, 2018). During their first migration, they accompany their mothers to higher latitudes, and they remain with their mother for about 6-7 months (Norsk Polarinstitut, 2018), so the arrival of recruits to the model was assumed 6.5 months.

No information about mortality was found for the Bay of Biscay, therefore, the mortality rates were those defined in the NoBa Atlantis model (Hansen et al., 2016),  $3.04 \cdot 10^{-06}$  and  $5.10 \cdot 10^{-08}$  per day for juveniles and adults, respectively.

The vertical distribution was defined considering a dive range of 100-200 m (Perrin et al., 2009). Detailed vertical distribution can be found in Section S3, Table S6. The fin whales dive at around 1 m s<sup>-1</sup>

<sup>1</sup> (Edwards et al., 2015). The horizontal distribution was established based on the shelf (depth < 200 m), slope (200 < depth < 2000 m) and oceanic (depth > 2000 m) strata classification of the area from Laran et al. (2017), and assuming a homogeneous distribution upon the boxes of each area. Detailed horizontal distribution can be found in Section S3, Fig. S1.

1285 The main source of food of baleen whales is macrozooplankton, mackerel, sardine, anchovy, other planktivorous fishes, cods, small demersal fishes, squids and gelatinous zooplankton (Clarke et al., 1993; Giménez et al., 2013; Haug et al., 1995; Pierce et al., 2004; Ryan et al., 2014; Spitz et al., 2011). Detailed diet matrix can be found in Section S4, Table S7.

### Surface feeding seabirds

1290 Surface feeding seabirds were parameterized as northern gannet (*Morus bassanus*), as it is the most abundant specie based on Pettex et al. (2017). An initial abundance of 541933 birds was used, which was calculated using information of individuals per km<sup>2</sup> for 2012 from Pettex et al. (2017) and doing a reconstruction of the time series of the numbers of birds for the period 2004-2016 with Authier et al. (2018); the initial abundance value used corresponded to the year 2004.

1295 They live around 16-24 years (Phang, 2017), so a maximum longevity of 20 years was assumed. The fraction of mature per age class was based on the assumption of a total maturity for species at year 3, the age at which northern gannets mature (Winn and Olla, 2012). Detailed fractions of each age class which is mature can be found in Section S2, Table S3. It was not possible to find weight-at-age class, hence, a weight distribution was calculated based upon the general length-weight formula of  $W = 0.02 \cdot L^3$  from  
1300 Girardin et al. (2018) and information of hatching growth and mass range from Animal Diversity Web (2018). Their weight at hatching is about 79.3 gr and they reach a weight between 2.47 and 3.61 kg in the last years of life. The growth rate for each age class (mgN per day) was calculated based on the amount of weight each individual needs to gain to reach the weight of the next age class within a time window of 2 years. Detailed growth rate per age class can be found in Section S2, Table S4.

1305 Females lay a single egg from the end of April through mid-June, although they may lay up to 3 replacement eggs if they are lost (Animal Diversity Web, 2018). They need 42 to 46 days to hatch, and 90 days to become independent (Animal Diversity Web, 2018), so the arrival of recruits to the model was assumed 90 days.

The first year after hatching has the highest mortality rate, in particular during the period just after fledging when immature individuals are unable to fly. Approximately 65% of immature northern gannets do not survive to adulthood, and adult mortality rates are expected to be less than 6%. Therefore, a mortality of 0.65 and 0.06 individuals per year for juveniles and adults, respectively, was used. Converting this mortality rates to daily mortality and implementing the recommendations of (Audzijonyte et al., 2017), mortality rates of  $1.781e^{-07}$  and  $1.644e^{-08}$  per day for juveniles and adults, respectively, were assumed.

The northern gannet dive up to 30 m (Winn and Olla, 2012), and we therefore assumed that they are present down to 30 m depth. Detailed vertical distribution can be found in Section S3, Table S6. Northern gannets travel down the water column at  $0.81 \text{ m s}^{-1}$  (Ropert-Coudert et al., 2009). As in the other seabirds group, the horizontal distribution was based on the work by Pettex et al. (2017) and assuming a homogeneous distribution upon the boxes of each area. Detailed horizontal distribution can be found in Section S3, Fig. S1.

The adult seabirds feed on almost all pelagic groups, small demersal fishes and discards (Alonso et al., 2015; Furness and Todd, 1984; Hamer et al., 2000; Moreno et al., 2010; Ramos et al., 1998). The juvenile seabirds, however, do not eat adult large fishes (pers. comm. Xavier Corrales). Detailed diet matrix can be found in Section S4, Table S7.

Based on the work by Pettex et al. (2017), this seabirds can also be considered winter visitors.

### **Diving and pursuit divers seabirds**

This functional group was parameterized based upon data for common murre (*Uria aalge*). Based on Pettex et al. (2017), the common murre is the most abundant specie in the Bay of Biscay. The model was initialized with an abundance of 255653 birds, which was calculated using information of individuals per  $\text{km}^2$  for 2012 from Pettex et al. (2017) and doing a reconstruction of the time series of the numbers of birds for the period 2004-2016 with Authier et al. (2018); the initial abundance value used corresponded to the year 2004.

The longevity is about 23 years (The Wildlife Trusts, 2018), and adult birds can reach a weight around 1.250 kg (Wikipedia, 2018), while chicks weigh between 55-95 g when they are hatched (Animal Diversity Web, 2018). The common murre mature at 3 years old (Winn and Olla, 2012), so the fraction

of each age class that is sexually mature was assumed to be 1 at 3 years old. Detailed fractions of each age class which is mature can be found in Section S2, Table S3. The weight distribution was defined using chicks and adult weight previously mentioned and the general length-weight formula of  $W = 0.02 \cdot L^3$  from Girardin et al. (2018). The growth rate for each age class (mgN per day) was calculated based on the weight each individual needs to gain to reach the weight of the next age class within a time window of 2 years. Detailed growth rate per age class can be found in Section S2, Table S4.

They have an average of 1 egg per season (Animal Diversity Web, 2018). The eggs are laid between May and July in populations breeding on the Atlantic coast (Animal Diversity Web, 2018). Both parents participate in the incubation process, which takes between 28 and 34 days divided into 12-24 hour shifts (Animal Diversity Web, 2018). After 18-25 days, chicks leave the nest (Animal Diversity Web, 2018), so the arrival of recruits to the model was assumed 21 days.

With no available information on mortality for our area, mortality rates from the NoBa Atlantis model were used (Hansen et al., 2016),  $5.37 \cdot 10^{-9}$  and  $2.74 \cdot 10^{-11}$  per day were assumed for juveniles and adults, respectively.

The common murre's mean maximum dive depth is found at 65.65 m (Browning et al., 2018), so a depth range of 0-70 m was assumed. Detailed vertical distribution can be found in Section S3, Table S6. They dive at around  $0.9 \text{ m s}^{-1}$  (Rory et al., 2002). The horizontal distribution was based on the neritic (depth < 200 m), slope (200 m < depth < 2000 m) and oceanic (> 2000 m) strata classification of the area from Pettex et al. (2017), and assuming a homogeneous distribution upon the boxes of each area. Detailed horizontal distribution can be found in Section S3, Fig. S1.

The diet of adult seabirds consist mainly of sardine, anchovy, other planktivorous fish and discards (Alvarez, 1998; Anderson et al., 2014; Arcos and Oro, 2002; Fortin et al., 2013; Gomes, 2015; Granadeiro et al., 1998; Mirra, 2010). The juveniles, however, do not eat adult large fish due to regurgitation (pers. comm. Xavier Corrales). Detailed diet matrix can be found in Section S4, Table S7.

Most of the seabird groups encountered in the Eastern North Atlantic are more abundant during winter (November-February period) (Pettex et al., 2017), and could therefore be considered winter migrators.

**Section S2 – Final parameter values for the Bay of Biscay Atlantis model, after calibration.**

1365 **Table S2.** Initial biomass (t), growth rate (mgN per day) and mortality rates (per day) for invertebrates.

| Group                       | Initial condition | Growth (mgN per day) | Mortality (per day) |                    |
|-----------------------------|-------------------|----------------------|---------------------|--------------------|
|                             | Biomass (t)       |                      | Linear              | Quadratic          |
| Benthic cephalopods         | 63552.8892        | 0.0014               | 0                   | $1 \cdot 10^{-10}$ |
| Squids                      | 41295.6458        | 0.0006               | 0                   | $1 \cdot 10^{-10}$ |
| Norway lobster              | 16196.8662        | 0.006                | 0                   | 0.0000001          |
| Pelagic crab                | 79601.6974        | 0.05                 | 0                   | 0.0000001          |
| Zooplankton feeding shrimps | 176609.2186       | 0.0001               | 0                   | $1 \cdot 10^{-10}$ |
| Benthos-feeders decapods    | 264557.8056       | 0.02                 | 0                   | 0.0000001          |
| Detritus-feeders decapods   | 229140.5263       | 0.02                 | 0                   | 0.0000001          |
| Bivalves                    | 125731.1736       | 0.02                 | 0                   | 0.0000001          |
| Polychaetes                 | 570980.7028       | 0.02                 | 0                   | 0.0000001          |
| Suprabenthos                | 366213.6138       | 0.02                 | 0                   | 0.0000001          |
| Echimoderms                 | 162923.8930       | 0.005                | 0                   | 0.0000001          |
| Other invertebrates         | 1054992.5732      | 0.04                 | 0                   | 0.0000001          |
| Gelatinous zooplankton      | 118746.335        | 0.02                 | 0                   | 0.000005           |
| Macrozooplankton            | 744449.9483       | 0.05                 | 0                   | 0.000001           |
| Mesozooplankton             | 1123973.4514      | 0.025                | 0                   | 0                  |
| Microzooplankton            | 802838.1795       | 0.05                 | 0.0001              | 0                  |
| Primary producers           | 71293.0813        | 1                    | 0                   | 0                  |
| Large phytoplankton         | 616278.8765       | 0.1                  | 0                   | 0                  |
| Small phytoplankton         | 1083370.8592      | 0.1                  | 0.02                | 0                  |
| Pelagic bacteria            | 831917.5150       | 1.2                  | 0                   | 0                  |
| Sediment bacteria           | 831917.5150       | 1.5                  | 0                   | 0                  |

1370

1375

**Table S3.** Initial biomass (t), age class structure and reproduction parameters for vertebrates. Two reproduction relationships were used: a modified Beverton-Holt spawn and species biomass dependent recruitment relationship (BH) or a number of recruits per adult.

| Group                               | Initial condition |                              |
|-------------------------------------|-------------------|------------------------------|
|                                     | Biomass (t)       | Age per class <sup>380</sup> |
| Diving and pursuit divers' seabirds | 169.3699          | 2                            |
| Surface feeding seabirds            | 999.6767          | 2                            |
| Baleen whales                       | 23231.3078        | 9                            |
| Toothed cetaceans                   | 5611.5053         | 6                            |
| Demersal sharks                     | 19013.6750        | 2                            |
| Pelagic sharks                      | 9267.4457         | 2                            |
| Deep water sharks                   | 7407.7733         | 1                            |
| Skates and rays                     | 25398.8806        | 1                            |
| Bluefin tuna                        | 15099.6053        | 2                            |
| Albacore                            | 296592.8006       | 1                            |
| Other large pelagic fishes          | 20575.1807        | 1                            |
| Mackerel                            | 299444.7738       | 2                            |
| Horse mackerel                      | 349211.1068       | 2                            |
| Sardine                             | 251321.1936       | 1                            |
| Anchovy                             | 75124.4587        | 1                            |
| Other planktivorous fishes          | 168586.9675       | 3                            |
| Mesopelagic fishes                  | 262103.4563       | 1                            |
| Anglerfish                          | 30170.4836        | 2                            |
| Seabass                             | 24618.7846        | 3                            |
| Blue whiting                        | 287872.5183       | 1                            |
| Hake                                | 28117.7286        | 1                            |
| Cods                                | 65258.4241        | 1                            |
| Megrim                              | 13966.5248        | 2                            |
| Common sole                         | 19850.0280        | 3                            |
| Flatfishes                          | 16956.3365        | 1                            |
| Mulletts                            | 10837.5403        | 1                            |
| Large demersal fishes               | 67801.7133        | 2                            |
| Medium demersal fishes              | 31536.7536        | 4                            |
| Small demersal fishes               | 135260.8628       | 1                            |
| Deep-sea fishes                     | 9488.0876         | 1                            |



Table S3 (continued)

| Group                              | Class at first maturity | Initial condition                         |       |       |       |       |       |       |       |       |        |
|------------------------------------|-------------------------|-------------------------------------------|-------|-------|-------|-------|-------|-------|-------|-------|--------|
|                                    |                         | Fraction of the age class which is mature |       |       |       |       |       |       |       |       |        |
|                                    |                         | Age 1                                     | Age 2 | Age 3 | Age 4 | Age 5 | Age 6 | Age 7 | Age 8 | Age 9 | Age 10 |
| Diving and pursuit divers seabirds | 2                       | 0                                         | 1     | 1     | 1     | 1     | 1     | 1     | 1     | 1     | 1      |
| Surface feeding seabirds           | 2                       | 0                                         | 1     | 1     | 1     | 1     | 1     | 1     | 1     | 1     | 1      |
| Baleen whales                      | 1                       | 0.75                                      | 1     | 1     | 1     | 1     | 1     | 1     | 1     | 1     | 1      |
| Toothed cetaceans                  | 1                       | 1                                         | 1     | 1     | 1     | 1     | 1     | 1     | 1     | 1     | 1      |
| Demersal sharks                    | 4                       | 0                                         | 0     | 0     | 1     | 1     | 1     | 1     | 1     | 1     | 1      |
| Pelagic sharks                     | 3                       | 0                                         | 0     | 1     | 1     | 1     | 1     | 1     | 1     | 1     | 1      |
| Deep water sharks                  | 4                       | 0                                         | 0     | 0     | 1     | 1     | 1     | 1     | 1     | 1     | 1      |
| Skates and rays                    | 6                       | 0                                         | 0     | 0     | 0     | 0     | 1     | 1     | 1     | 1     | 1      |
| Bluefin tuna                       | 2                       | 0                                         | 0.125 | 0.75  | 1     | 1     | 1     | 1     | 1     | 1     | 1      |
| Albacore                           | 6                       | 0                                         | 0     | 0     | 0.1   | 0.5   | 1     | 1     | 1     | 1     | 1      |
| Other large pelagic fishes         | 2                       | 0                                         | 1     | 1     | 1     | 1     |       |       |       |       |        |
| Mackerel                           | 2                       | 0                                         | 1     | 1     | 1     | 1     | 1     | 1     | 1     | 1     | 1      |
| Horse mackerel                     | 2                       | 0                                         | 0.5   | 1     | 1     | 1     | 1     | 1     | 1     | 1     | 1      |
| Sardine                            | 2                       | 0                                         | 0.47  | 0.992 | 0.998 | 0.999 | 0.999 | 1     | 1     | 1     | 1      |
| Anchovy                            | 2                       | 0                                         | 0.5   | 1     |       |       |       |       |       |       |        |
| Other planktivorous fishes         | 2                       | 0.03                                      | 0.68  | 1     | 1     | 1     | 1     | 1     | 1     | 1     | 1      |
| Mesopelagic fishes                 | 2                       | 0                                         | 1     | 1     | 1     | 1     | 1     | 1     | 1     |       |        |
| Anglerfish                         | 3                       | 0                                         | 0     | 0.125 | 0.31  | 0.5   | 0.5   | 0.56  | 0.81  | 1     | 1      |
| Seabass                            | 2                       | 0                                         | 0.067 | 0.652 | 0.942 | 0.993 | 0.999 | 1     | 1     | 1     | 1      |
| Blue whiting                       | 3                       | 0                                         | 0     | 1     | 1     | 1     | 1     | 1     | 1     | 1     | 1      |
| Hake                               | 3                       | 0                                         | 0     | 0.5   | 1     | 1     | 1     | 1     | 1     | 1     | 1      |
| Cods                               | 3                       | 0                                         | 0     | 1     | 1     | 1     | 1     |       |       |       |        |
| Megrim                             | 2                       | 0.25                                      | 0.77  | 0.98  | 1     | 1     | 1     | 1     | 1     | 1     | 1      |
| Common sole                        | 2                       | 0.44                                      | 0.93  | 1     | 1     | 1     | 1     | 1     | 1     | 1     | 1      |
| Flatfishes                         | 4                       | 0                                         | 0     | 0     | 1     | 1     | 1     | 1     | 1     | 1     | 1      |
| Mulletts                           | 2                       | 0                                         | 0.54  | 0.65  | 1     | 1     | 1     | 1     | 1     | 1     | 1      |
| Large demersal fishes              | 3                       | 0                                         | 0     | 1     | 1     | 1     | 1     | 1     | 1     | 1     | 1      |
| Medium demersal fishes             | 4                       | 0                                         | 0     | 0     | 1     | 1     | 1     | 1     | 1     | 1     | 1      |
| Small demersal fishes              | 3                       | 0                                         | 0     | 1     | 1     | 1     | 1     | 1     | 1     | 1     | 1      |
| Deep-sea fishes                    | 3                       | 0                                         | 0     | 1     | 1     | 1     | 1     | 1     | 1     | 1     | 1      |

Table S3 (continued)

| Group                              | Recruitment               |                          |             |
|------------------------------------|---------------------------|--------------------------|-------------|
|                                    | BH $\alpha$ ( $10^{10}$ ) | BH $\beta$ ( $10^{10}$ ) | # per adult |
| Diving and pursuit divers seabirds |                           |                          | 1 1390      |
| Surface feeding seabirds           |                           |                          | 0.7         |
| Baleen whales                      |                           |                          | 0.03        |
| Toothed cetaceans                  |                           |                          | 0.04        |
| Demersal sharks                    |                           |                          | 2           |
| Pelagic sharks                     |                           |                          | 0.05        |
| Deep water sharks                  |                           |                          | 0.5         |
| Skates and rays                    |                           |                          | 0.2         |
| Bluefin tuna                       | 0.09                      | 0.1                      |             |
| Albacore                           | 0.05                      | 3                        |             |
| Other large pelagic fishes         | 0.0007                    | 0.8                      | 1395        |
| Mackerel                           | 0.15                      | 3                        |             |
| Horse mackerel                     | 0.09                      | 4                        |             |
| Sardine                            | 0.1                       | 2.5                      |             |
| Anchovy                            | 2.5                       | 1                        |             |
| Other planktivorous fishes         | 0.12                      | 2                        |             |
| Mesopelagic fishes                 | 0.7                       | 1.5                      |             |
| Anglerfish                         | 0.001                     | 0.3                      |             |
| Seabass                            | 0.0001                    | 0.2                      |             |
| Blue whiting                       | 0.1                       | 2                        |             |
| Hake                               | 0.001                     | 0.4                      |             |
| Cods                               | 0.7                       | 0.5                      | 1400        |
| Megrim                             | 0.0009                    | 0.04                     |             |
| Common sole                        | 0.008                     | 0.2                      |             |
| Flatfishes                         | 0.0459                    | 0.1                      |             |
| Mulletts                           | 9                         | 0.08                     |             |
| Large demersal fishes              | 0.00009                   | 0.5                      |             |
| Medium demersal fishes             | 0.013                     | 0.2                      |             |
| Small demersal fishes              | 0.015                     | 1                        |             |
| Deep-sea fishes                    | 0.0009                    | 0.1                      |             |

**Table S4.** Length-weight relationship and growth rate (mgN per day) per class for vertebrates.

| Group                              | Length/weight <sup>1410</sup> |        |
|------------------------------------|-------------------------------|--------|
|                                    | a                             | b      |
| Diving and pursuit divers seabirds | 0.02                          | 3      |
| Surface feeding seabirds           | 0.02                          | 3      |
| Baleen whales                      | 0.0015                        | 3.46   |
| Toothed cetaceans                  | 0.01                          | 3      |
| Demersal sharks                    | 0.0022                        | 3.1194 |
| Pelagic sharks                     | 0.0044                        | 3.11   |
| Deep water sharks                  | 0.0026                        | 3.03   |
| Skates and rays                    | 0.0045                        | 3.0686 |
| Bluefin tuna                       | 0.0126                        | 3.01   |
| Albacore                           | 0.0438                        | 2.825  |
| Other large pelagic fishes         | 0.0072                        | 3.1644 |
| Mackerel                           | 0.0032                        | 3.2695 |
| Horse mackerel                     | 0.0073                        | 3.0254 |
| Sardine                            | 0.0059                        | 3.077  |
| Anchovy                            | 0.007                         | 3.017  |
| Other planktivorous fishes         | 0.0305                        | 2.791  |
| Mesopelagic fishes                 | 0.0017                        | 3.431  |
| Anglerfish                         | 0.0246                        | 2.8561 |
| Seabass                            | 0.0125                        | 2.9485 |
| Blue whiting                       | 0.00375                       | 3.082  |
| Hake                               | 0.00513                       | 3.074  |
| Cods                               | 0.0086                        | 2.98   |
| Megrim                             | 0.00649                       | 3.0114 |
| Common sole                        | 0.00475                       | 3.1809 |
| Flatfishes                         | 0.00137                       | 3.543  |
| Mulletts                           | 0.00512                       | 3.2956 |
| Large demersal fishes              | 0.00023                       | 3.4991 |
| Medium demersal fishes             | 0.01072                       | 3.08   |
| Small demersal fishes              | 0.00856                       | 3.131  |
| Deep-sea fishes                    | 0.00129                       | 3.232  |

Table S4 (continued)

| Group                              | Growth per age class (mgN per day) |                      |                      |                      |                      |                      |                      |                      |                      |                      |
|------------------------------------|------------------------------------|----------------------|----------------------|----------------------|----------------------|----------------------|----------------------|----------------------|----------------------|----------------------|
|                                    | 1                                  | 2                    | 3                    | 4                    | 5                    | 6                    | 7                    | 8                    | 9                    | 10                   |
| Diving and pursuit divers seabirds | 1.8025                             | 15.688               | 24.7003              | 40.3883              | 56.0763              | 71.7643              | 87.4523              | 103.1403             | 118.8283             | 134.5163             |
| Surface feeding seabirds           | 0.1906                             | 9.428                | 11.3338              | 20.7618              | 30.1899              | 39.6179              | 49.0459              | 58.4739              | 67.9019              | 77.33                |
| Baleen whales                      | 5.94 10 <sup>4</sup>               | 5.01 10 <sup>4</sup> | 3.47 10 <sup>5</sup> | 3.97 10 <sup>5</sup> | 4.47 10 <sup>5</sup> | 4.97 10 <sup>5</sup> | 5.47 10 <sup>5</sup> | 5.97 10 <sup>5</sup> | 6.48 10 <sup>5</sup> | 6.98 10 <sup>5</sup> |
| Toothed cetaceans                  | 48.8665                            | 1928.439             | 4371.762             | 6300.2               | 8228.64              | 1.02 10 <sup>4</sup> | 1.21 10 <sup>4</sup> | 1.40 10 <sup>4</sup> | 1.59 10 <sup>4</sup> | 1.79 10 <sup>4</sup> |
| Demersal sharks                    | 0.339                              | 1.695                | 3.39                 | 5.085                | 6.78                 | 7.2017               | 7.6234               | 8.0451               | 8.4668               | 8.8885               |
| Pelagic sharks                     | 14.3784                            | 1141.334             | 1500.795             | 3108.658             | 4790.895             | 6314.149             | 7589.873             | 8599.201             | 9377.049             | 1.02 10 <sup>4</sup> |
| Deep water sharks                  | 0.7531                             | 3.7655               | 7.5309               | 11.2964              | 15.0619              | 19.14                | 23.2182              | 27.2963              | 31.3745              | 35.4527              |
| Skates and rays                    | 0.2451                             | 3.4355               | 4.6611               | 11.7851              | 21.5518              | 32.4667              | 46.6020              | 59.5766              | 80.3888              | 98.8719              |
| Bluefin tuna                       | 0.0095                             | 0.0477               | 0.9537               | 3.4968               | 7.3116               | 11.4442              | 15.8947              | 20.9809              | 25.7493              | 29.8819              |
| Albacore                           | 1.9941                             | 137.6657             | 369.0905             | 713.2548             | 1057.419             | 1401.583             | 1745.748             | 2293.035             | 2840.323             | 3387.61              |
| Other large pelagic fishes         | 1.5957                             | 55.8504              | 111.7008             | 186.6198             | 261.5387             |                      |                      |                      |                      |                      |
| Mackerel                           | 0.9299                             | 4.6453               | 6.1964               | 7.9588               | 9.1164               | 10.0076              | 11.5277              | 13.247               | 15.453               | 17.659               |
| Horse mackerel                     | 0.0946                             | 0.4732               | 0.9464               | 1.6021               | 2.2578               | 2.9134               | 3.5691               | 4.2247               | 4.8804               | 5.5361               |
| Sardine                            | 0.2004                             | 0.2535               | 1.2557               | 1.6751               | 1.9358               | 2.0007               | 2.0944               | 2.2507               | 2.4021               | 2.4706               |
| Anchovy                            | 0.1332                             | 0.3456               | 1.0118               |                      |                      |                      |                      |                      |                      |                      |
| Other planktivorous fishes         | 0.0051                             | 0.1062               | 0.1316               | 0.2734               | 0.3858               | 0.4581               | 0.5038               | 0.5254               | 0.5361               | 0.5446               |
| Mesopelagic fishes                 | 0.0351                             | 0.1757               | 0.3513               | 0.527                | 0.7027               | 0.8783               | 1.054                | 1.2297               |                      |                      |
| Anglerfish                         | 0.05                               | 29.7381              | 35.3052              | 81.9448              | 156.4855             | 284.5126             | 369.919              | 490.1862             | 839.1639             | 992.0211             |
| Seabass                            | 0.4727                             | 4.7268               | 9.4535               | 18.4817              | 27.5099              | 36.5381              | 45.5662              | 54.5944              | 63.6226              | 72.6508              |
| Blue whiting                       | 0.0919                             | 0.4595               | 0.919                | 1.3785               | 2.6593               | 3.94                 | 5.2208               | 6.5015               | 7.7823               | 9.0631               |
| Hake                               | 5.8495                             | 59.4645              | 88.7118              | 20.8626              | 44.0947              | 82.8911              | 142.2488             | 208.4211             | 337.8097             | 518.3536             |
| Cods                               | 0.0315                             | 1.1017               | 2.2033               | 3.305                | 5.837                | 8.369                |                      |                      |                      |                      |
| Megrim                             | 0.026                              | 2.6229               | 3.2727               | 8.1723               | 14.6614              | 23.7769              | 36.0722              | 49.0821              | 62.0921              | 75.102               |
| Common sole                        | 0.0639                             | 0.8205               | 1.1401               | 1.6895               | 1.952                | 2.0586               | 2.0712               | 2.0838               | 2.0965               | 2.1091               |
| Flatfishes                         | 0.0184                             | 0.0922               | 0.1845               | 0.2767               | 0.369                | 0.4612               | 0.5535               | 0.6457               | 0.738                | 0.8302               |
| Mulletts                           | 0.2292                             | 2.0287               | 3.1748               | 5.061                | 6.8812               | 8.7882               | 9.2902               | 9.7923               | 10.2944              | 10.7964              |
| Large demersal fishes              | 0.2449                             | 33.6371              | 39.7603              | 112.3663             | 223.1934             | 387.7967             | 584.5923             | 716.6375             | 745.4305             | 775.0265             |
| Medium demersal fishes             | 0.1728                             | 0.5068               | 1.3707               | 1.8774               | 2.0271               | 2.4944               | 3.1486               | 3.4482               | 3.6837               | 3.9192               |
| Small demersal fishes              | 0.1407                             | 0.8438               | 1.5474               | 2.5041               | 3.3546               | 4.0373               | 4.8697               | 5.7947               | 6.7196               | 7.6446               |
| Deep-sea fishes                    | 0.1366                             | 3.4162               | 6.8324               | 10.2486              | 13.6648              | 17.0811              | 20.4973              | 23.9135              | 27.3297              | 30.7459              |

**Table S5.** Mortality rates (per day) for vertebrates.

| Group                              | Mortality (per day) |       |                        |                       |
|------------------------------------|---------------------|-------|------------------------|-----------------------|
|                                    | Linear              |       | Quadratic              |                       |
|                                    | Juvenile            | Adult | Juvenile ( $10^{-8}$ ) | Adult ( $10^{-8}$ )   |
| Diving and pursuit divers seabirds | 0                   | 0     | 53.7                   | 27.4                  |
| Surface feeding seabirds           | 0                   | 0     | 17.81                  | 1.644                 |
| Baleen whales                      | 0                   | 0     | 3040                   | 510                   |
| Toothed cetaceans                  | 0                   | 0     | 0.02739                | 547.9                 |
| Demersal sharks                    | 0                   | 0     | 0.352                  | 0.0574                |
| Pelagic sharks                     | 0                   | 0     | 0.02739                | 54.79                 |
| Deep water sharks                  | 0                   | 0     | 0.0001545              | 3.09                  |
| Skates and rays                    | 0                   | 0     | 0.002602               | 0.005204              |
| Bluefin tuna                       | 0                   | 0     | 9.041                  | 3.79                  |
| Albacore                           | 0                   | 0     | 0.08219                | 8.219                 |
| Other large pelagic fishes         | 0                   | 0     | 0.001192               | 0.002384              |
| Mackerel                           | 0                   | 0     | $2.055 \cdot 10^{-12}$ | $4.11 \cdot 10^{-32}$ |
| Horse mackerel                     | 0                   | 0     | 0.0002055              | 0.000411              |
| Sardine                            | 0                   | 0     | $2.297 \cdot 10^{-7}$  | 0.0001142             |
| Anchovy                            | 0                   | 0     | 0.001644               | 0.00003288            |
| Other planktivorous fishes         | 0                   | 0     | 0.0002192              | 0.0004384             |
| Mesopelagic fishes                 | 0                   | 0     | $6.25 \cdot 10^{-12}$  | $1 \cdot 10^{-9}$     |
| Anglerfish                         | 0                   | 0     | 3.082                  | 0.6164                |
| Seabass                            | 0                   | 0     | 0.06575                | 0.006575              |
| Blue whiting                       | 0                   | 0     | 0.0002739              | 0.000005479           |
| Hake                               | 0                   | 0     | 0.548                  | 0.001096              |
| Cods                               | 0                   | 0     | 0.00123                | $5.21 \cdot 10^{-6}$  |
| Megrim                             | 0                   | 0     | 0.00002739             | 0.00005479            |
| Common sole                        | 0                   | 0     | 0.000137               | 0.000274              |
| Flatfishes                         | 0                   | 0     | 0.0002739              | 0.0005479             |
| Mulletts                           | 0                   | 0     | 0.2863                 | 0.01087               |
| Large demersal fishes              | 0                   | 0     | 0.0002739              | 0.05479               |
| Medium demersal fishes             | 0                   | 0     | 0.0001644              | 0.03288               |
| Small demersal fishes              | 0                   | 0     | 0.000589               | 0.001178              |
| Deep-sea fishes                    | 0                   | 0     | 0.0006301              | 0.0003151             |

425

430

### Section S3 – Initial spatial structure of the functional groups included in the Bay of Biscay Atlantis model.

**Table S6.** Fractions of populations of juveniles and adults at daytime and night-time. L1 is the layer closest to the sediment, while L5 is the surface layer. The fractions must sum up to 1 for each of the groups.

| Group                              | L1    | L2        | L3          | L4          | L5          |
|------------------------------------|-------|-----------|-------------|-------------|-------------|
| Diving and pursuit divers seabirds | 0     | 0         | 0           | 0.29        | 0.71        |
| Surface feeding seabirds           | 0     | 0         | 0           | 0           | 1           |
| Baleen whales                      | 0     | 0         | 1           | 0           | 0           |
| Toothed cetaceans                  | 0.29  | 0.43      | 0.14        | 0.07        | 0.07        |
| Demersal sharks                    | 0.29  | 0.43      | 0.14        | 0.07        | 0.07        |
| Pelagic sharks                     | 0.29  | 0.43      | 0.14        | 0.07        | 0.07        |
| Deep water sharks                  | 0.861 | 0.083     | 0.028       | 0.014       | 0.014       |
| Skates and rays                    | 0     | 0.33      | 0.33        | 0.17        | 0.17        |
| Bluefin tuna                       | 0     | 0         | 0.2         | 0.4         | 0.4         |
| Albacore                           | 0     | 0         | 0           | 0.5         | 0.5         |
| Other large pelagic fishes         | 0     | 0         | 0.5         | 0.25        | 0.25        |
| Mackerel                           | 0     | 0.4166667 | 0.4166667   | 0.1666667   | 0           |
| Horse mackerel                     | 0     | 0.2       | 0.4         | 0.2         | 0.2         |
| Sardine                            | 0     | 0         | 0.333333333 | 0.333333333 | 0.333333333 |
| Anchovy (juvenile)                 | 0     | 0         | 0           | 0           | 1           |
| Anchovy (adult)                    | 0     | 0         | 0           | 0.5         | 0.5         |
| Other planktivorous fishes         | 0.5   | 0.3       | 0.1         | 0.05        | 0.05        |
| Mesopelagic fishes                 | 0.625 | 0.375     | 0           | 0           | 0           |
| Anglerfish                         | 0.5   | 0.3       | 0.1         | 0.05        | 0.05        |
| Seabass                            | 0     | 0         | 0           | 0.6         | 0.4         |
| Blue whiting                       | 0.3   | 0.7       | 0           | 0           | 0           |
| Hake                               | 0     | 0.7       | 0.2         | 0.1         | 0           |
| Cods                               | 0     | 0.37      | 0.37        | 0.19        | 0.07        |
| Megrim                             | 0.2   | 0.5       | 0.2         | 0.1         | 0           |
| Common sole                        | 0     | 0         | 0.5         | 0.25        | 0.25        |
| Flatfishes                         | 0.17  | 0.5       | 0.17        | 0.08        | 0.08        |
| Mulletts                           | 0     | 0.3333    | 0.3333      | 0.1667      | 0.1667      |
| Large demersal fishes              | 0.5   | 0.3       | 0.1         | 0.05        | 0.05        |
| Medium demersal fishes             | 0.17  | 0.5       | 0.17        | 0.08        | 0.08        |
| Small demersal fishes              | 0.5   | 0.3       | 0.1         | 0.05        | 0.05        |
| Deep-sea fishes                    | 0.756 | 0.151     | 0.05        | 0.025       | 0.018       |
| Benthic cephalopods                | 0.29  | 0.43      | 0.14        | 0.07        | 0.07        |
| Squids                             | 0.75  | 0.15      | 0.05        | 0.03        | 0.03        |
| Norway lobster                     | 0.196 | 0.588     | 0.196       | 0.02        | 0           |
| Pelagic crab                       | 0     | 0.6       | 0.2         | 0.1         | 0.1         |
| Zooplankton feeding shrimps        | 0.74  | 0.15      | 0.05        | 0.02        | 0.04        |
| Benthos-feeders decapods           | 0.64  | 0.21      | 0.07        | 0.04        | 0.04        |
| Detritus-feeders decapods          | 0.62  | 0.23      | 0.08        | 0.04        | 0.04        |
| Bivalves                           | 0     | 0         | 0.5         | 0.25        | 0.25        |
| Polychaetes                        | 0.9   | 0.06      | 0.02        | 0.01        | 0.01        |
| Suprabenthos                       | 0     | 0.54      | 0.27        | 0.14        | 0.05        |
| Echinoderms                        | 0.67  | 0.2       | 0.07        | 0.03        | 0.03        |
| Other invertebrates                | 0.75  | 0.15      | 0.05        | 0.03        | 0.03        |

Table S6 (continued)

| Group                  | L1   | L2   | L3   | L4    | L5    |
|------------------------|------|------|------|-------|-------|
| Gelatinous zooplankton | 0.75 | 0.15 | 0.05 | 0.025 | 0.025 |
| Macrozooplankton       | 0.75 | 0.15 | 0.05 | 0.025 | 0.025 |
| Mesozooplankton        | 0.75 | 0.15 | 0.05 | 0.025 | 0.025 |
| Microzooplankton       | 0.75 | 0.15 | 0.05 | 0.025 | 0.025 |
| Primary producers      | 0    | 0    | 0    | 0     | 1     |
| Large phytoplankton    | 0    | 0    | 0    | 0.5   | 0.5   |
| Small phytoplankton    | 0    | 0    | 0    | 0.5   | 0.5   |
| Pelagic bacteria       | 0.9  | 0.1  | 0    | 0     | 0     |
| Sediment bacteria      | 0.8  | 0.06 | 0.02 | 0.01  | 0.01  |
| Labile detritus        | 0.9  | 0.06 | 0.02 | 0.01  | 0.01  |
| Refractory detritus    | 0.9  | 0.06 | 0.02 | 0.01  | 0.01  |
| Carrion                | 0.9  | 0.06 | 0.02 | 0.01  | 0.01  |

Diving and pursuit divers seabirds

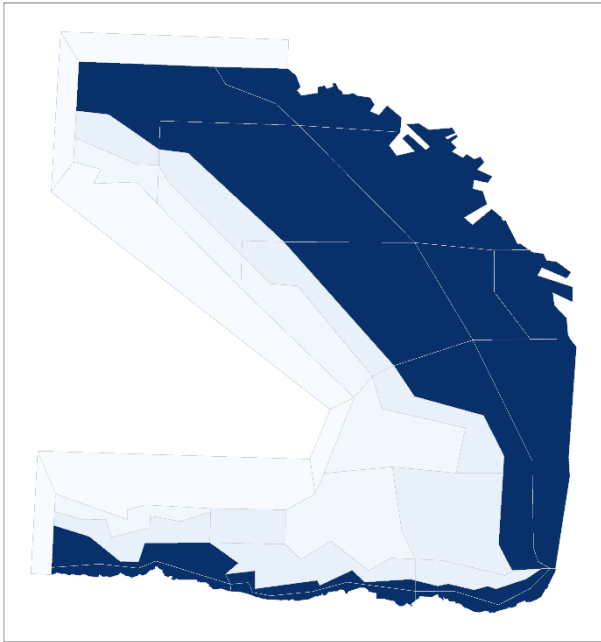

Surface feeding seabirds

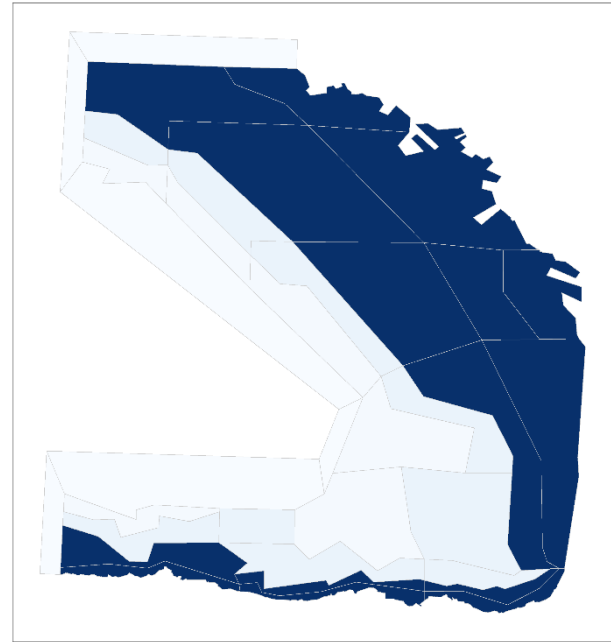

Baleen whales

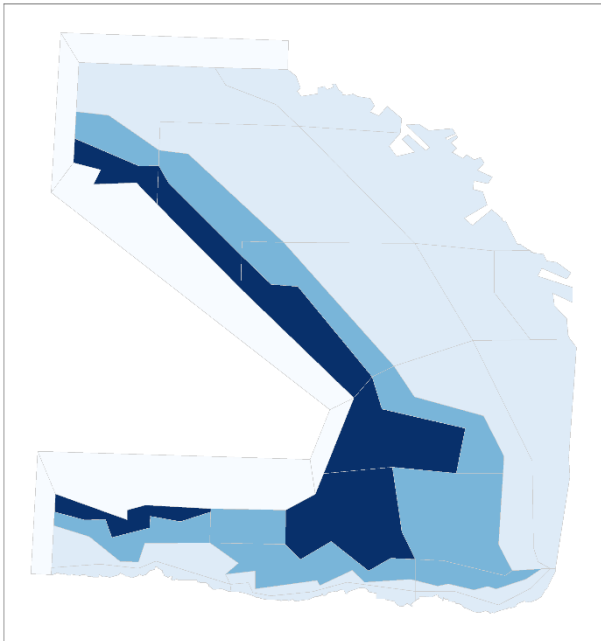

Toothed cetaceans

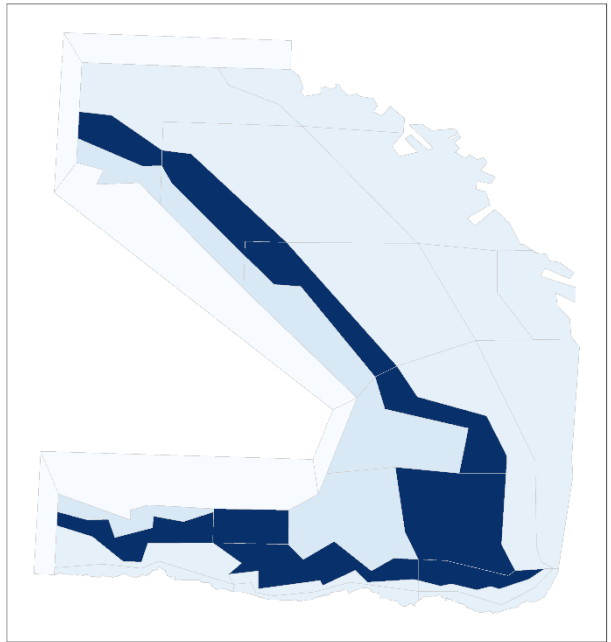



Demersal sharks

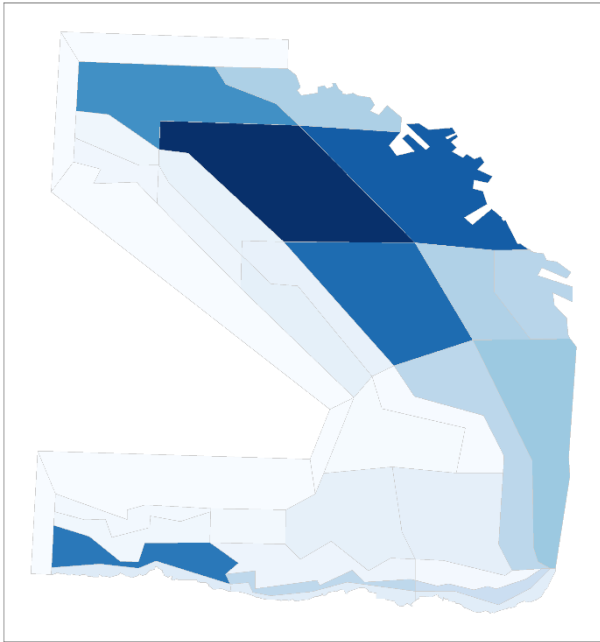

Pelagic sharks

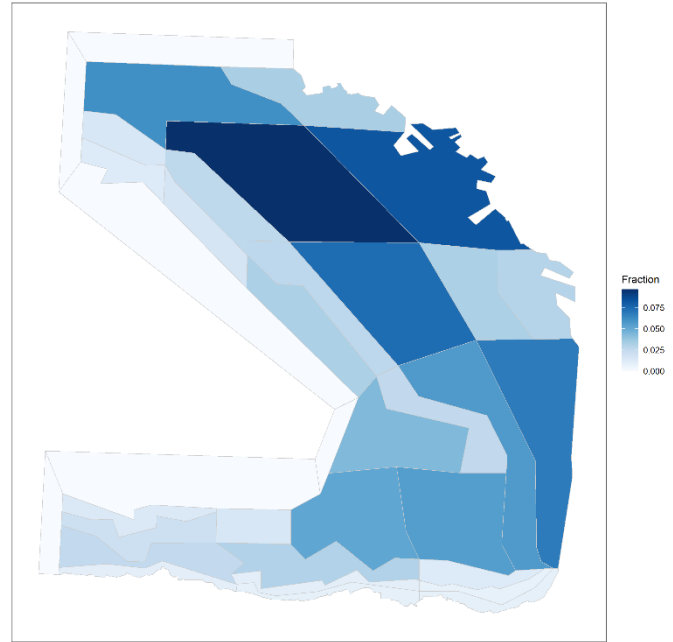

Deep water sharks

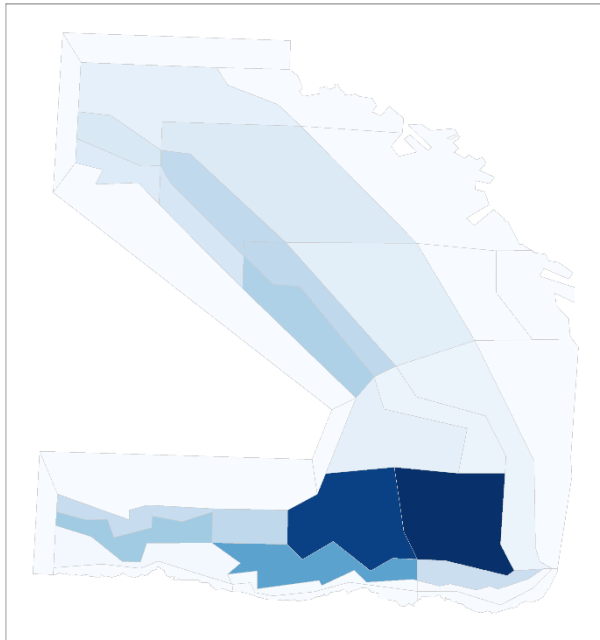

Skates and rays

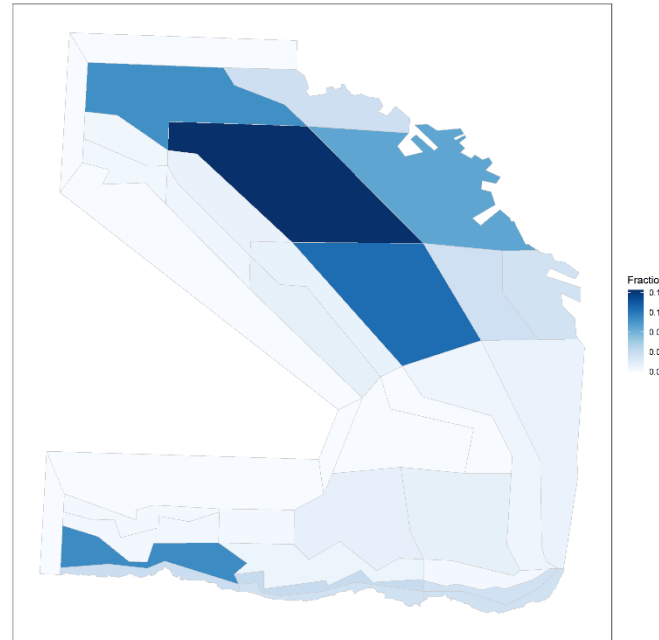

Bluefin tuna

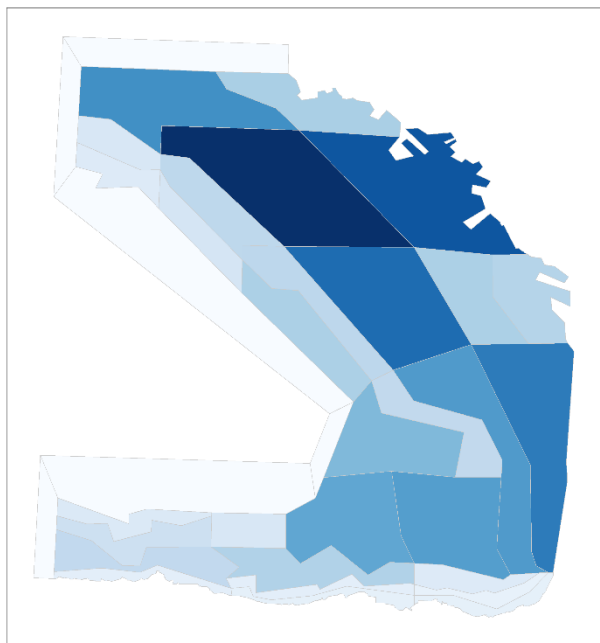

Albacore

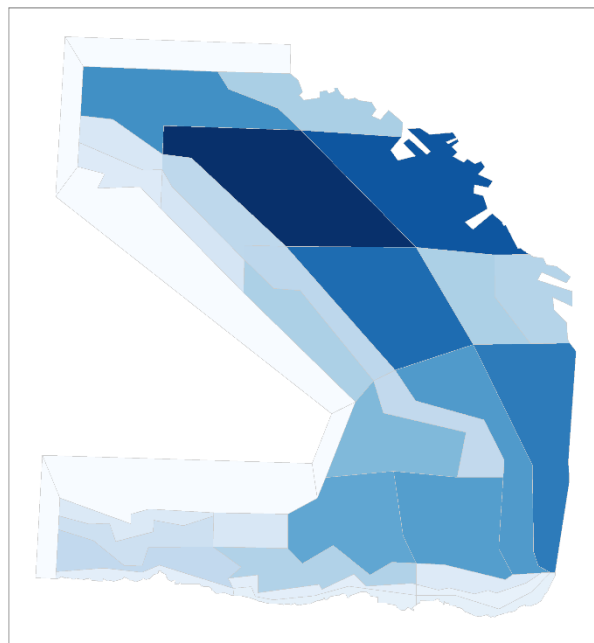

Other large pelagic fishes

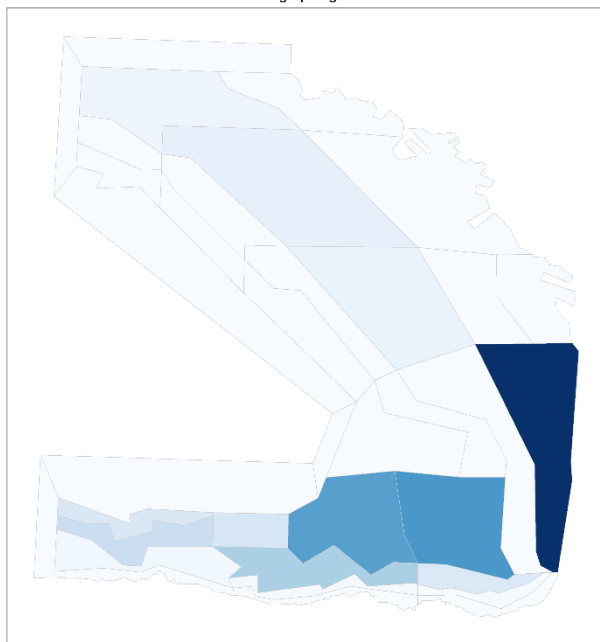

Mackerel

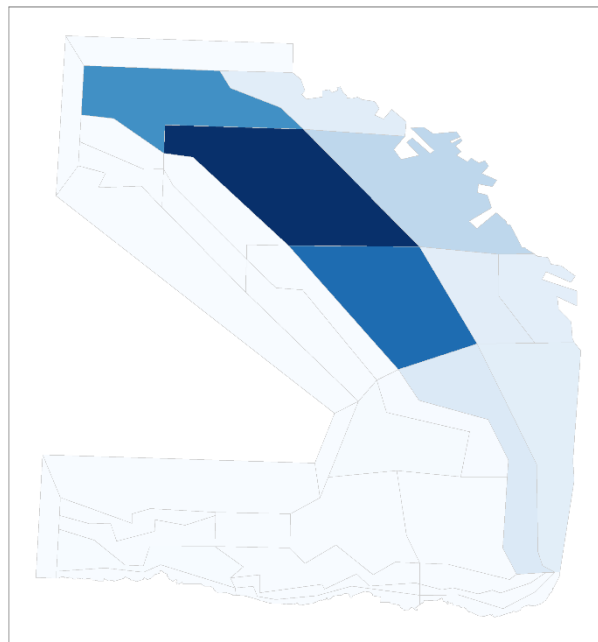

Horse mackerel

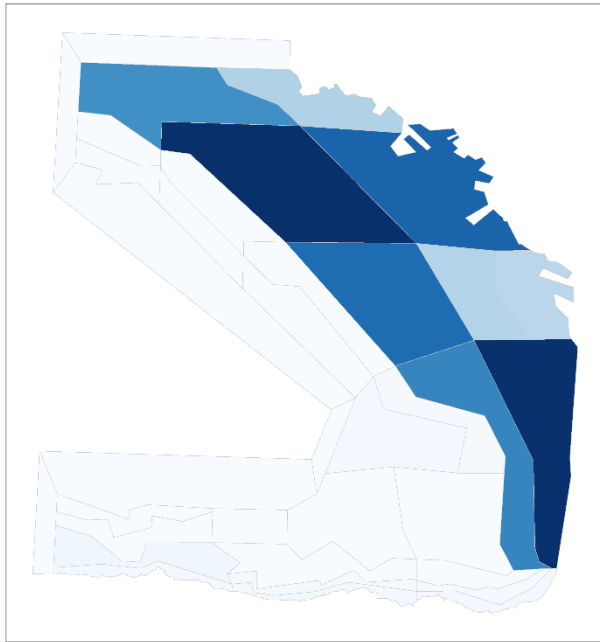

Sardine

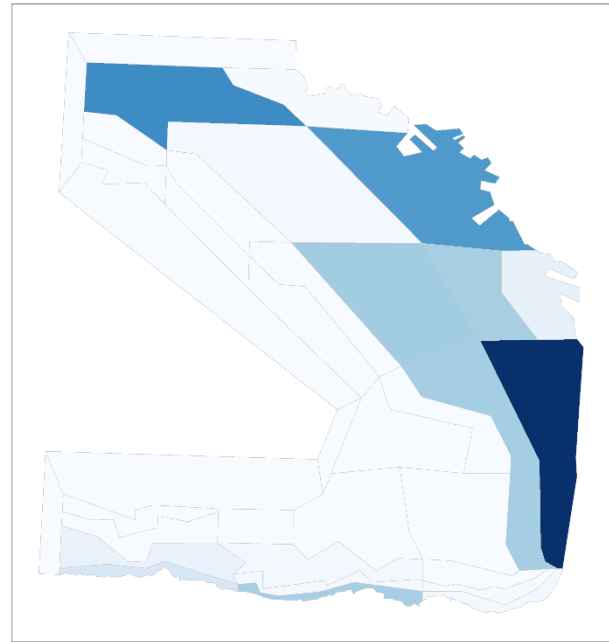

Anchovy

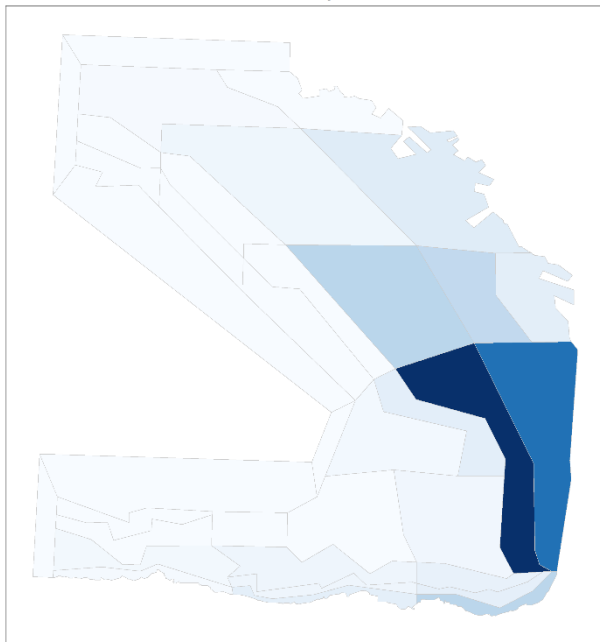

Other planktivorous fishes

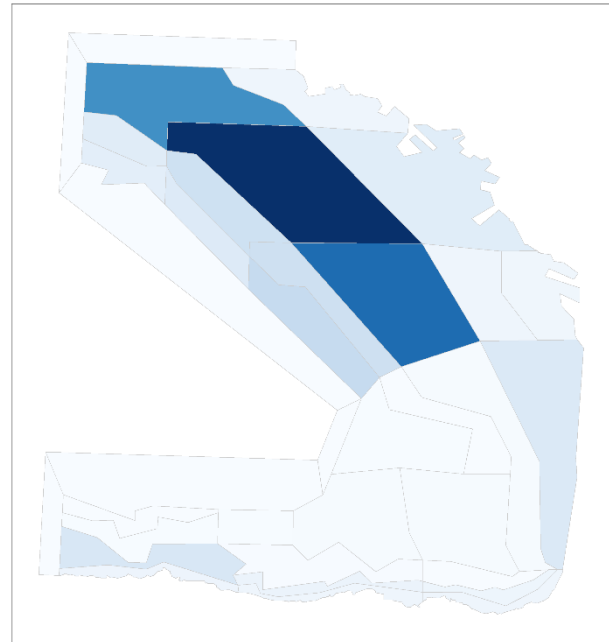

Mesopelagic fishes

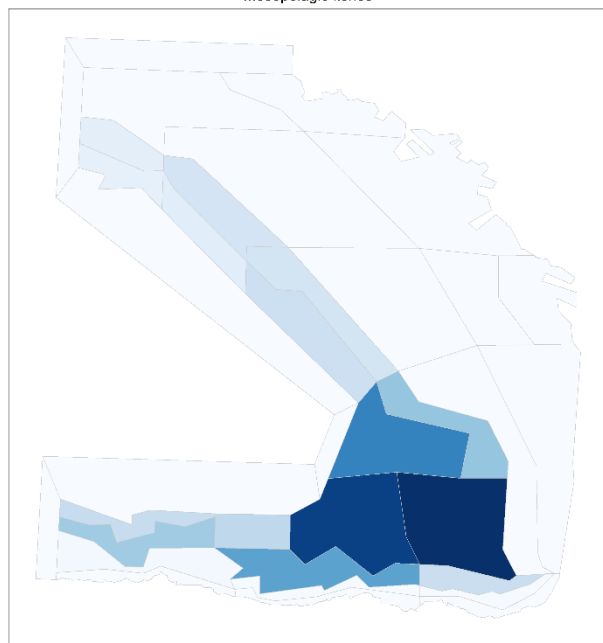

Anglerfish

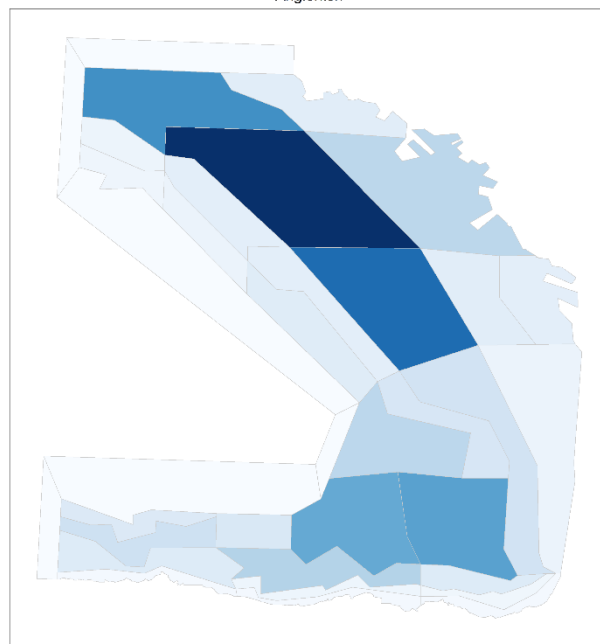

Seabass

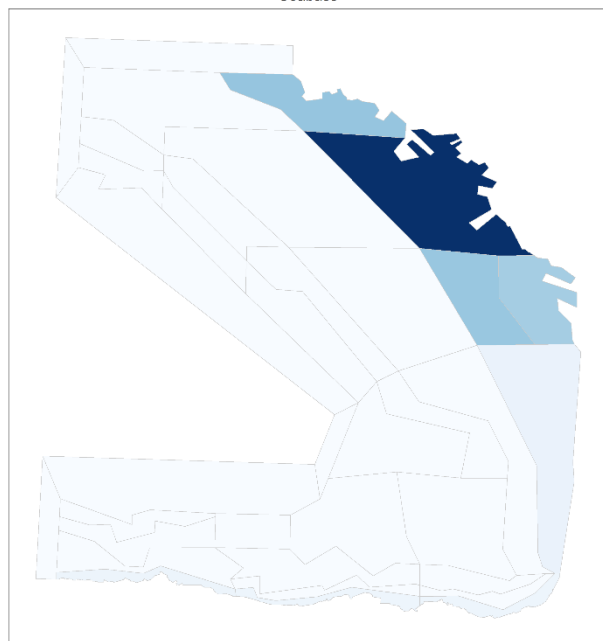

Blue whiting

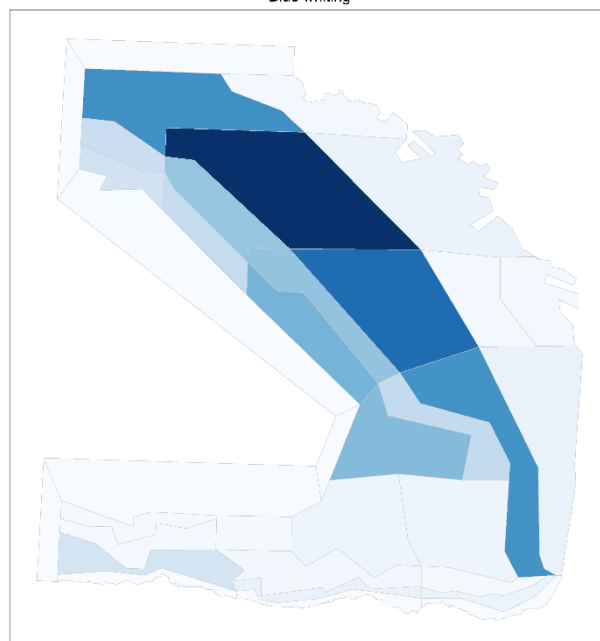

Hake

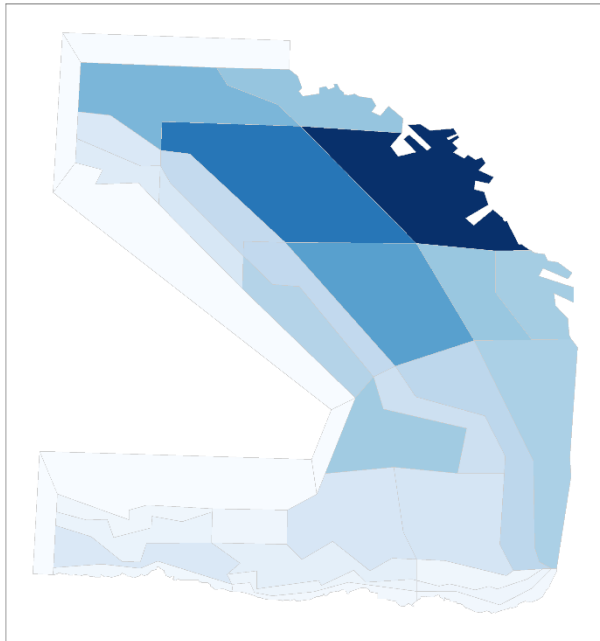

Cods

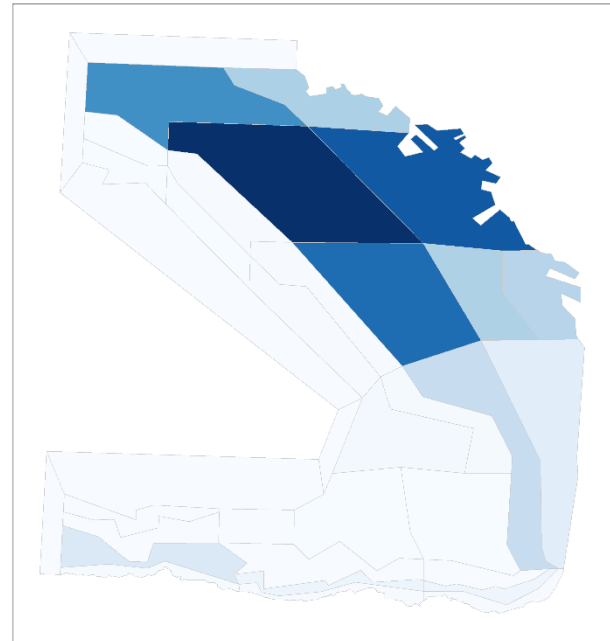

Megrim

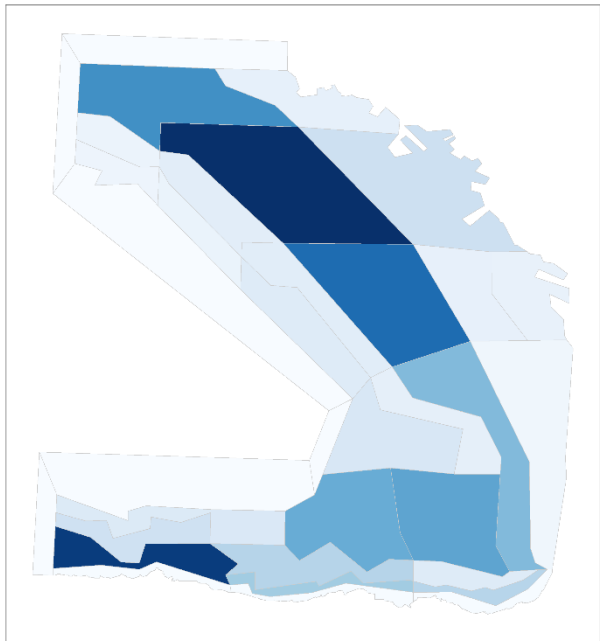

Common sole

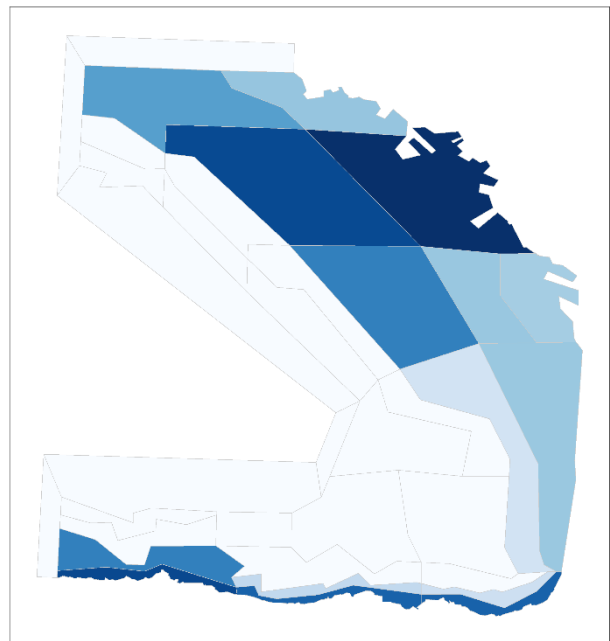

Flatfishes

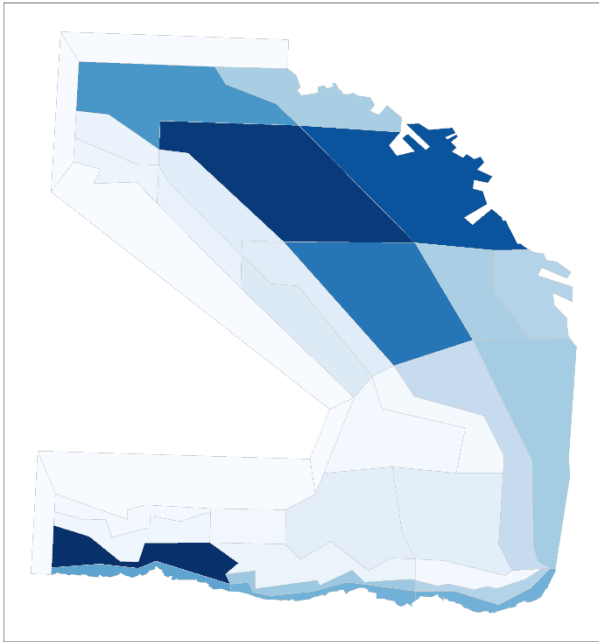

Mullets

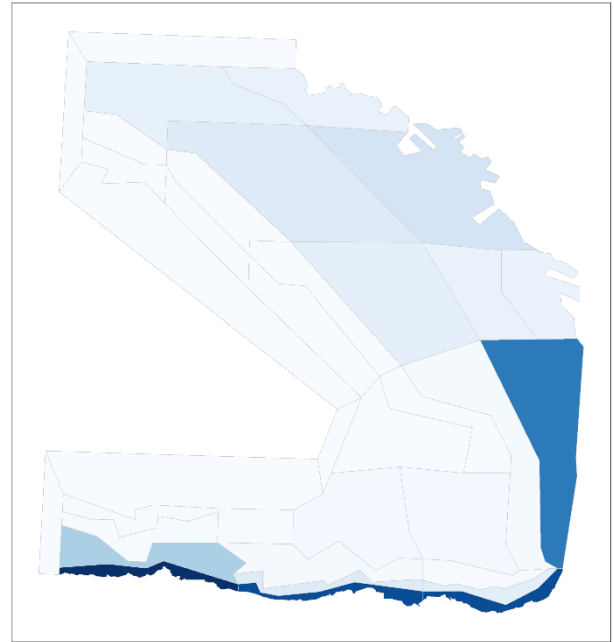

Large demersal fishes

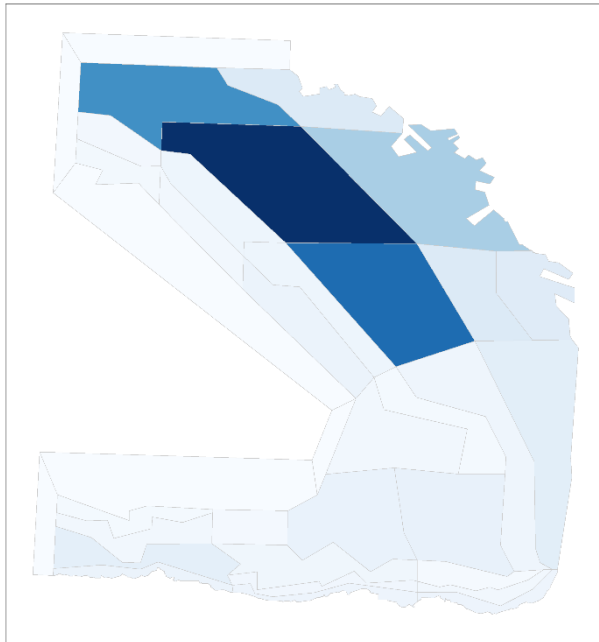

Medium demersal fishes

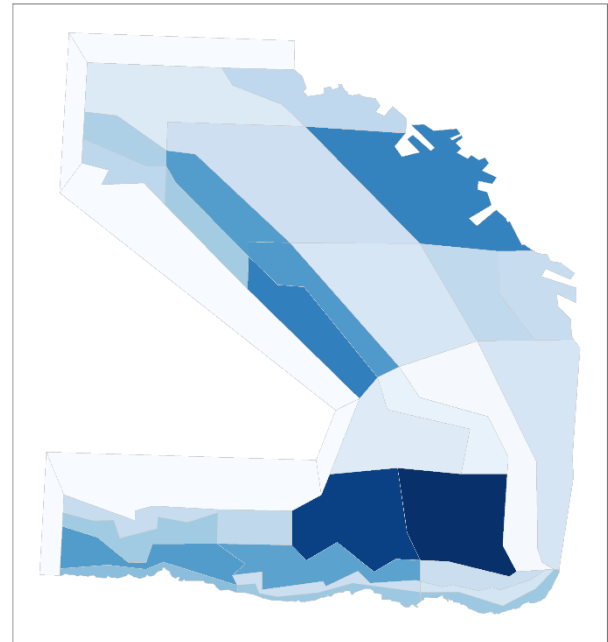

Small demersal fishes

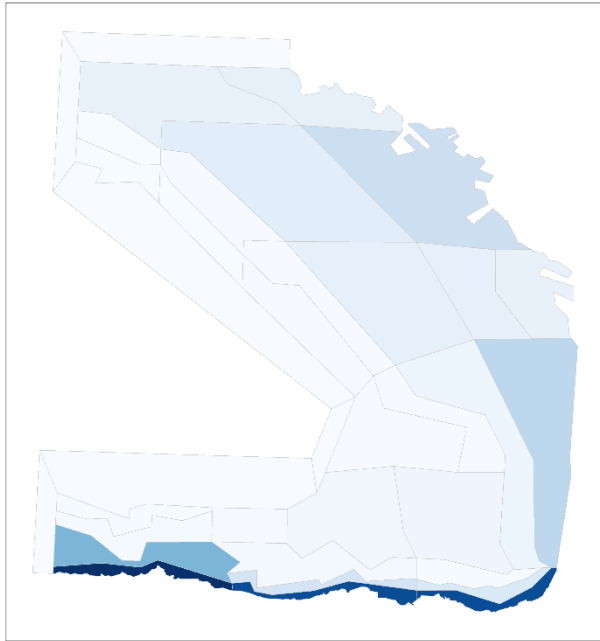

Deep-sea fishes

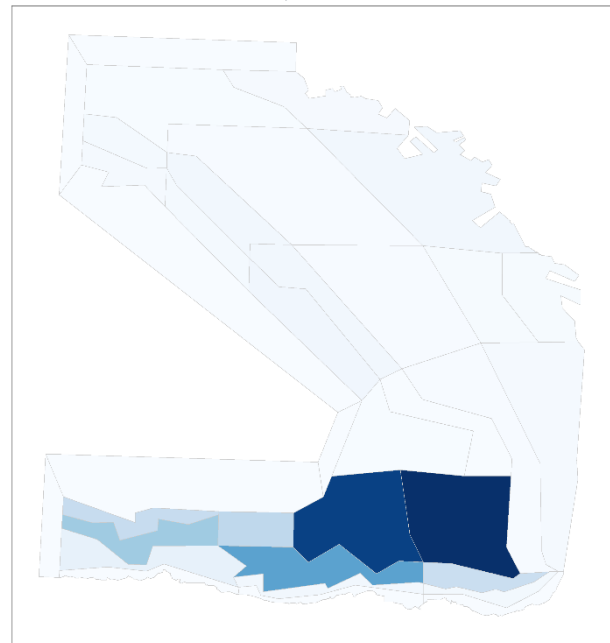

Benthic cephalopods

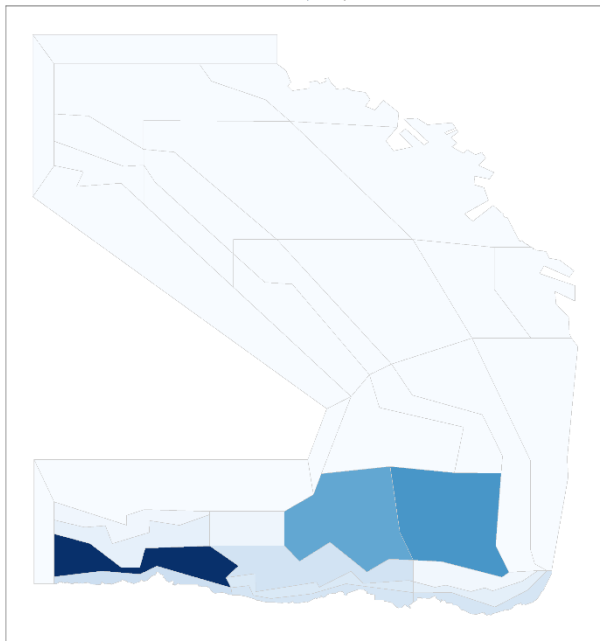

Squids

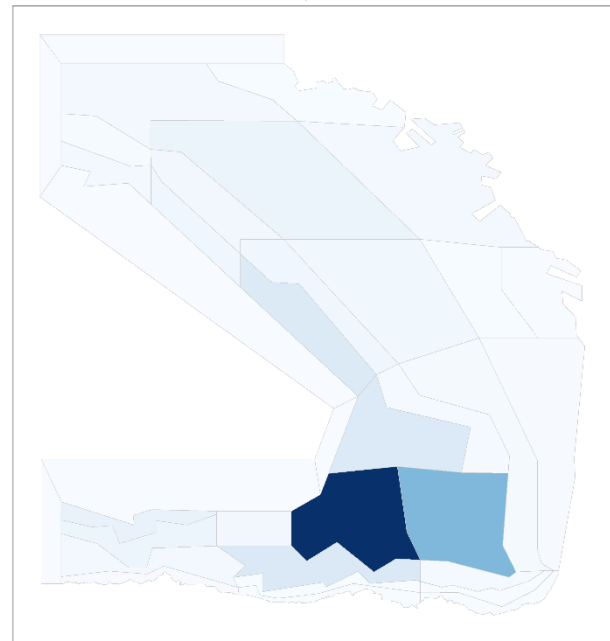

Norway lobster

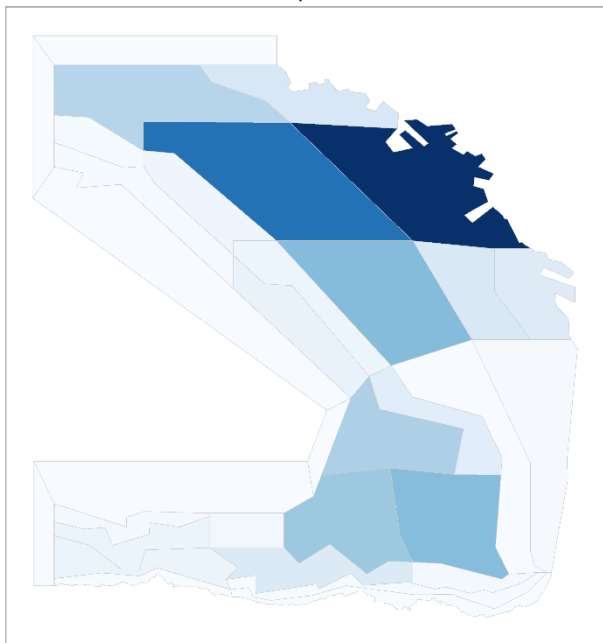

Pelagic crab

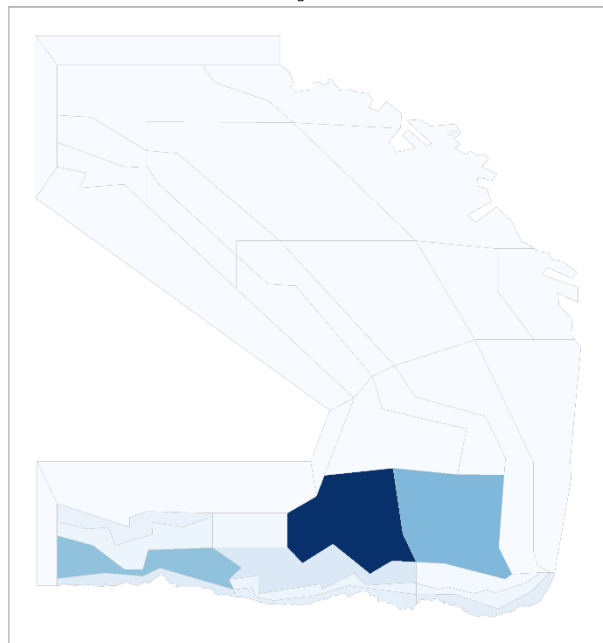

Zooplankton feeding shrimps

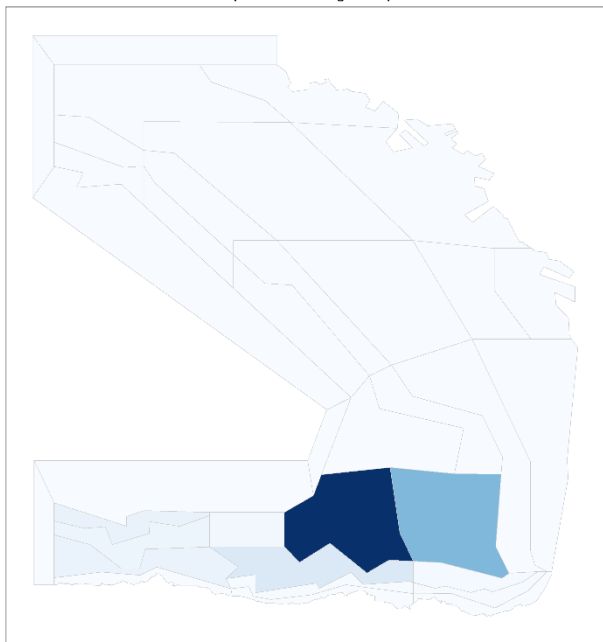

Benthos-feeders decapods

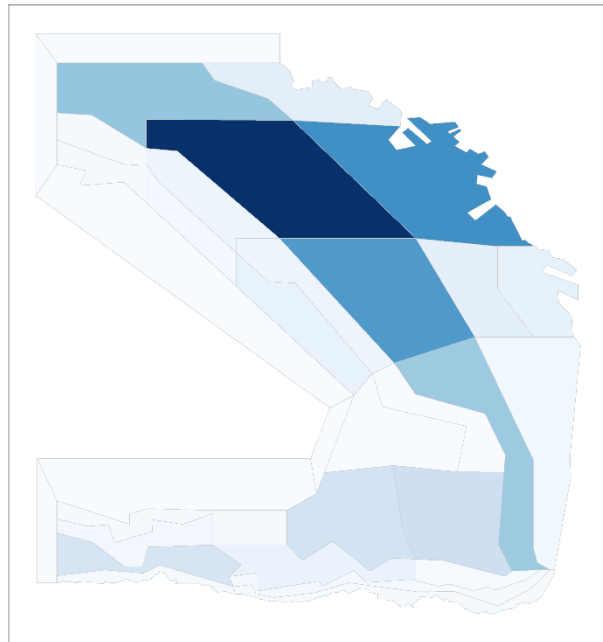



Detritus-feeders decapods

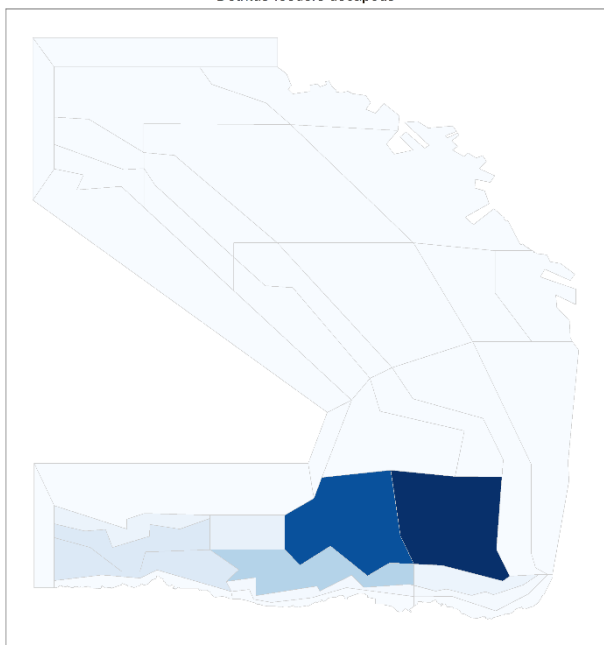

Bivalves

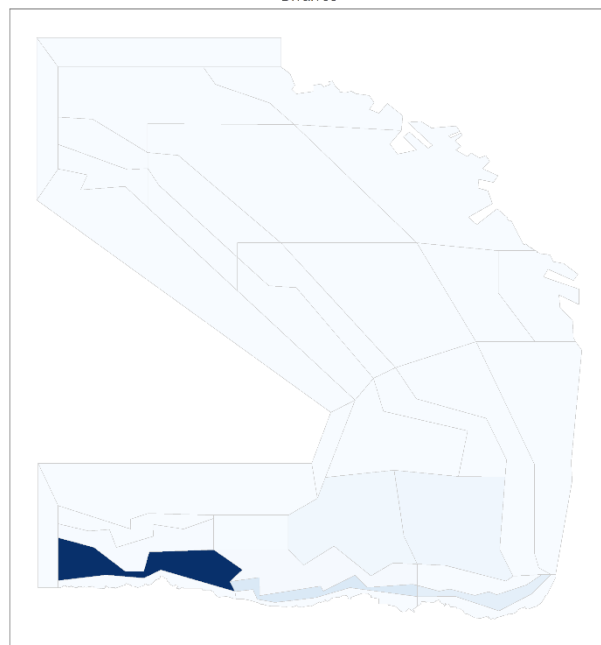

Polychaetes

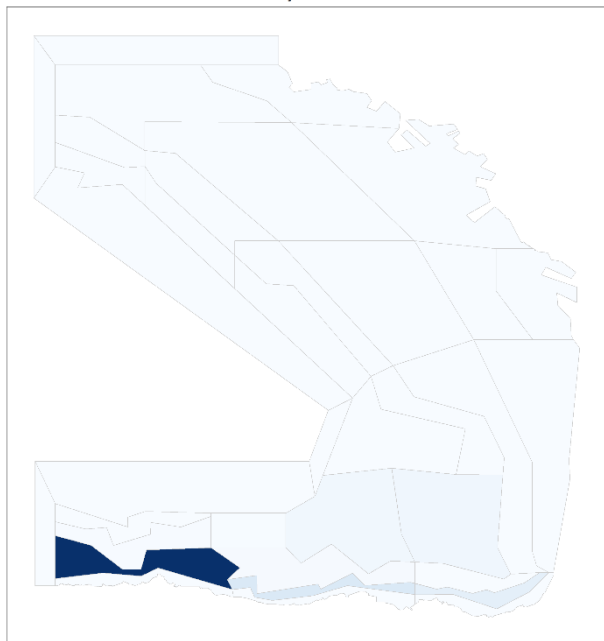

Suprabenthos

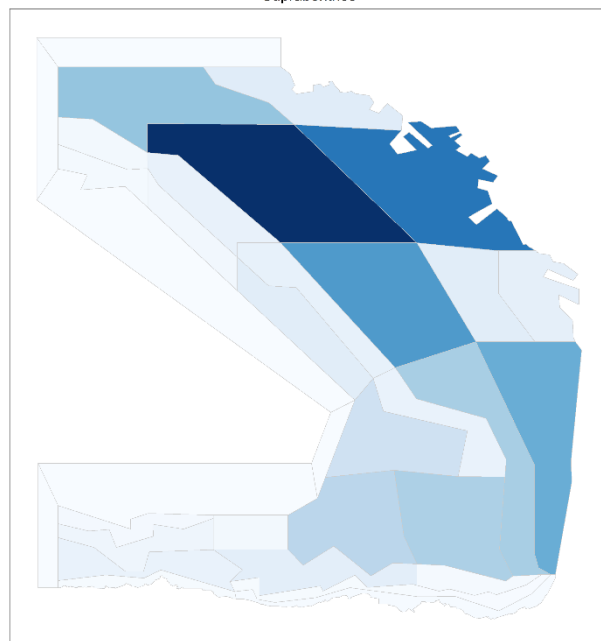

Echinoderms

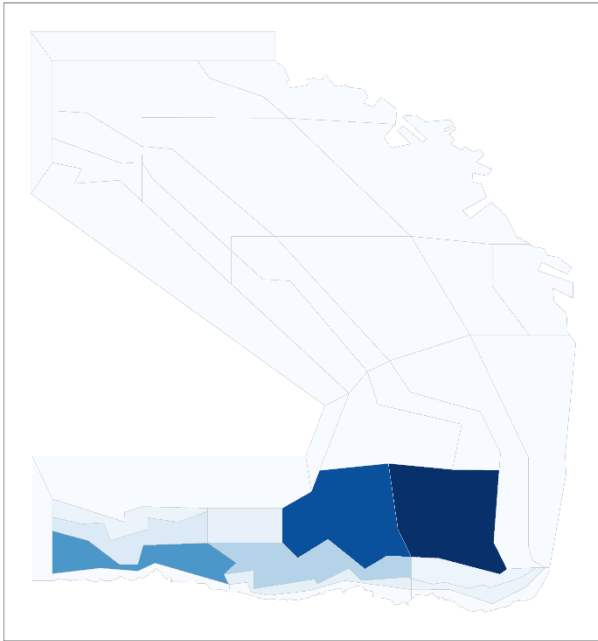

Other invertebrates

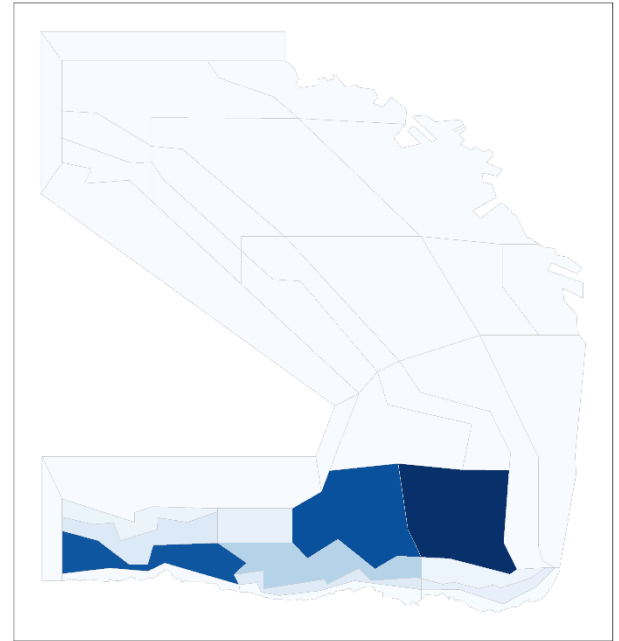

Gelatinous zooplankton

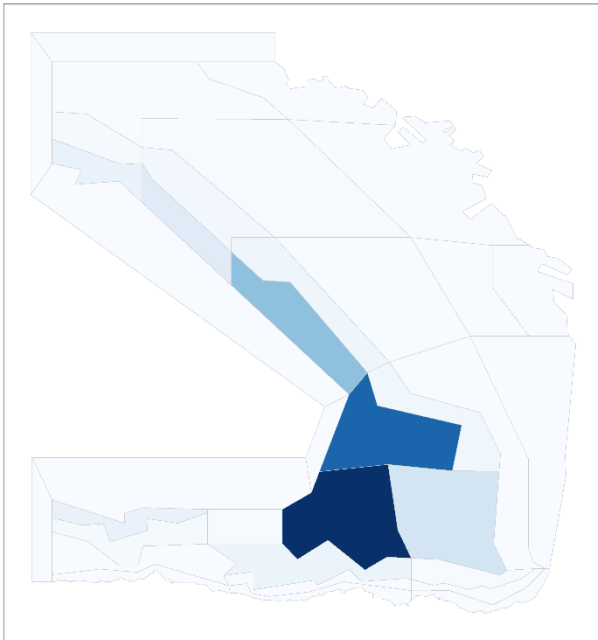

Macrozooplankton

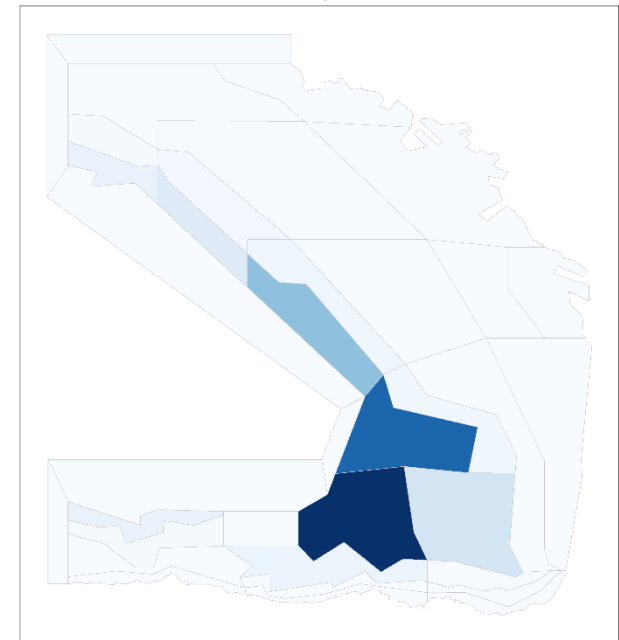

Mesozooplankton

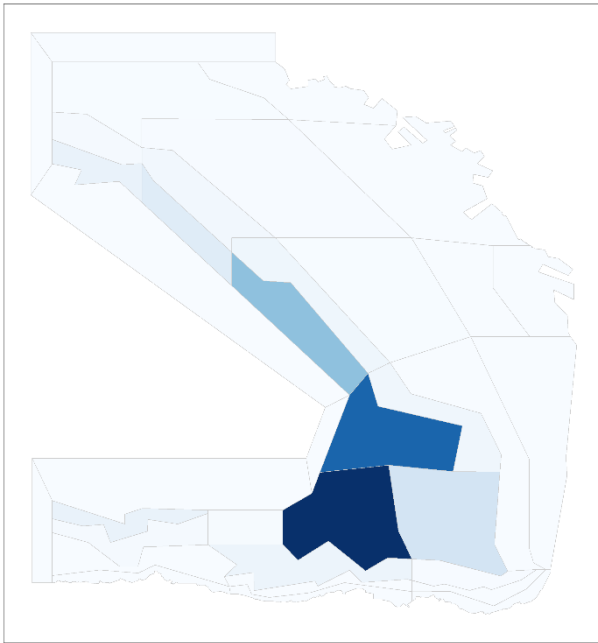

Microzooplankton

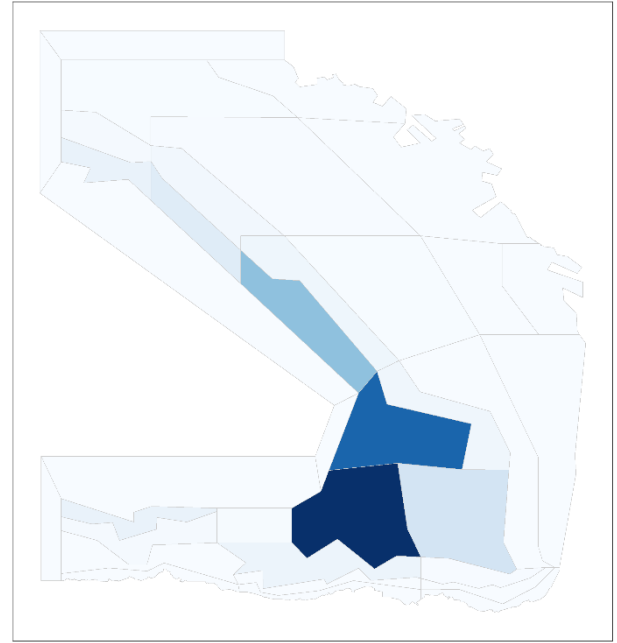

Benthic primary producers

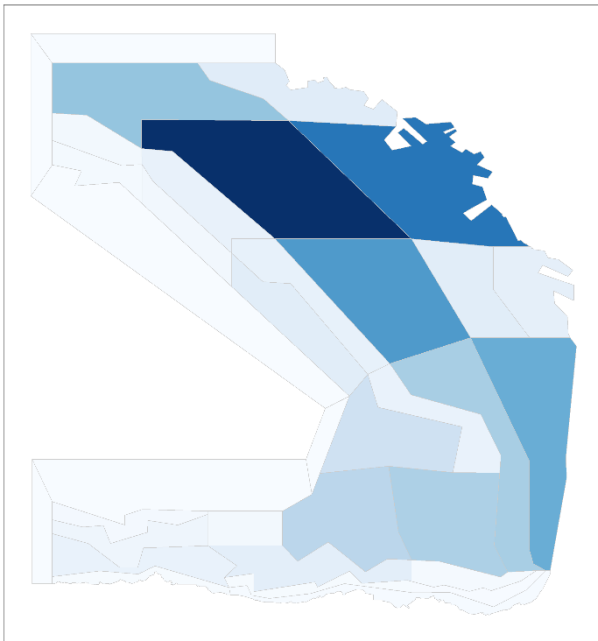

Large phytoplankton

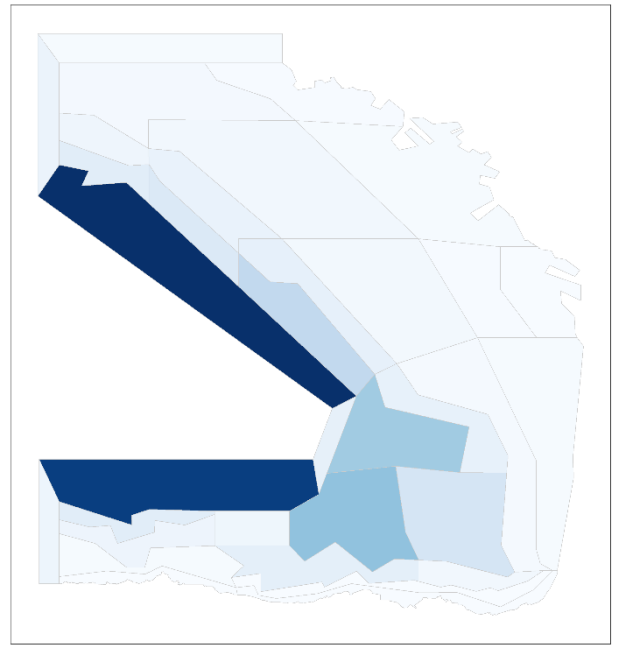

Small phytoplankton

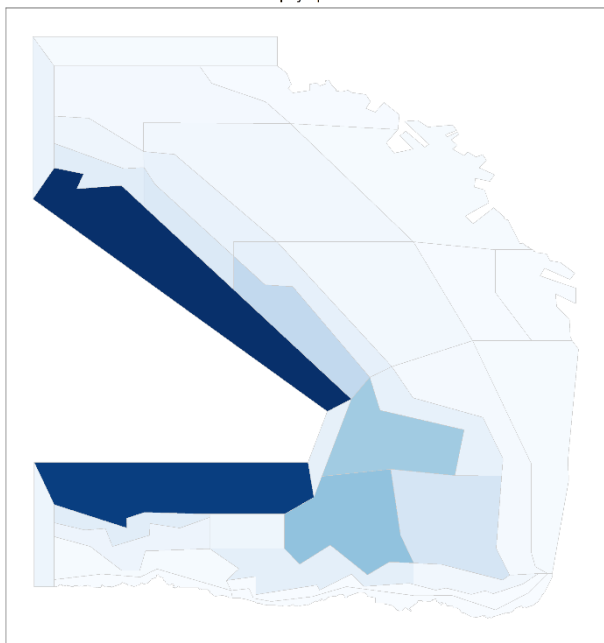

Pelagic bacteria

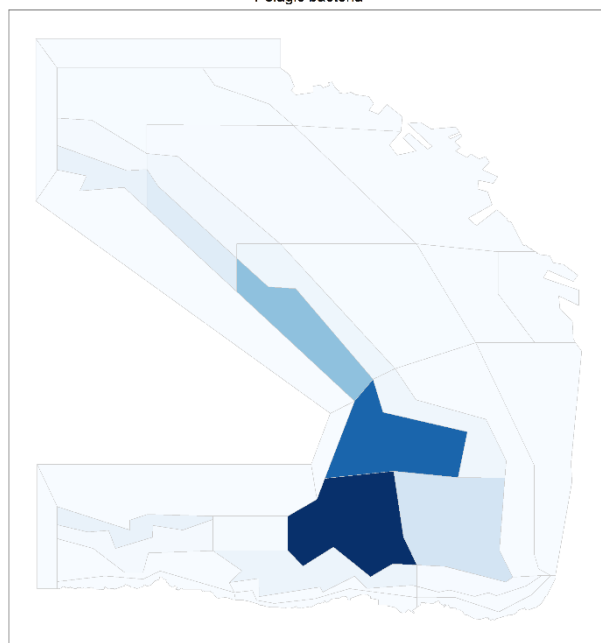

Sediment bacteria

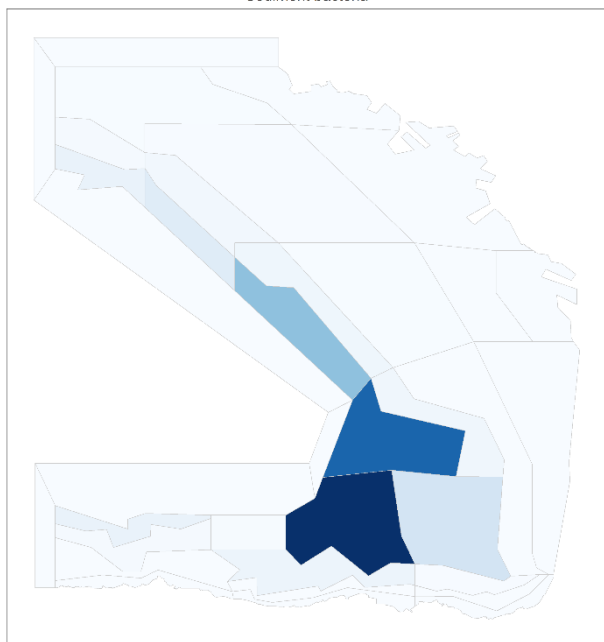

Labile detritus

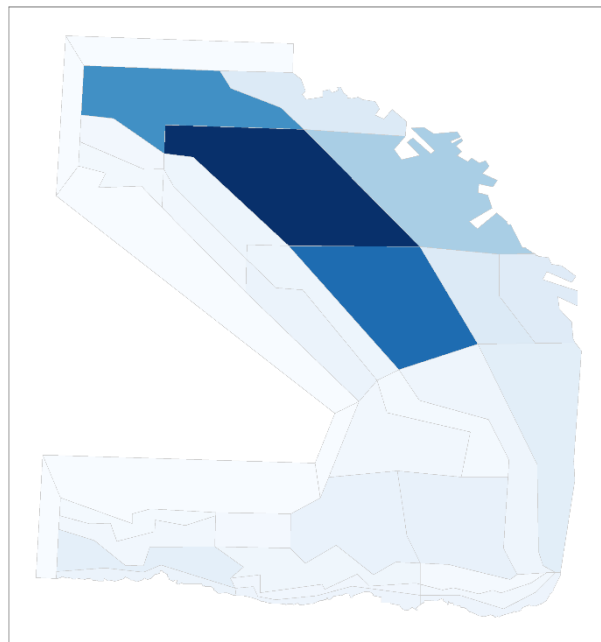

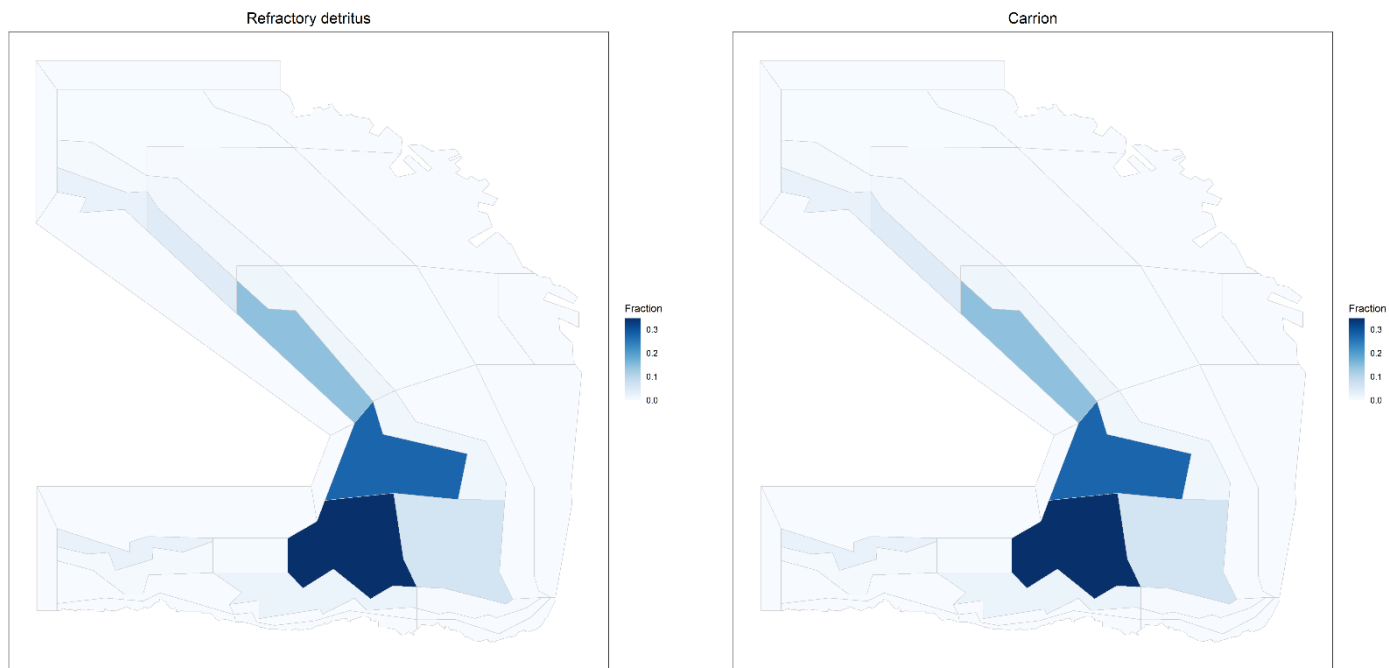

**Figure S1.** Fractions of populations per box of functional groups included in the Bay of Biscay Atlantis model. Same horizontal distribution was defined for juveniles and adults and each quarter of the year.

470

475

## Section S4 – Food web structure

**Table S7.** Availability matrix (ranging from 0 to 1). For vertebrates, juveniles (juv) and adults (ad) were separated if the parameters were different. Groups code can be found in Table S1.

|    | pred<br>prey stage | 1   |        | 2      |       | 3     | 4                      |        | 5      |        | 6      |        | 7      |        | 8                      |        |        |
|----|--------------------|-----|--------|--------|-------|-------|------------------------|--------|--------|--------|--------|--------|--------|--------|------------------------|--------|--------|
|    |                    | ad  | juv    | ad     | juv   |       | ad                     | juv    | ad     | juv    | ad     | juv    | ad     | juv    | ad                     | juv    |        |
| 1  | SBD                | 0   | 0      | 0      | 0     | 0     | 0                      | 0      | 0      | 0      | 0      | 0      | 0      | 0      | 0                      | 0      |        |
| 2  | SBS                | 0   | 0      | 0      | 0     | 0     | 0                      | 0      | 0      | 0      | 0      | 0      | 0      | 0      | 0                      | 0      |        |
| 3  | BWH                | 0   | 0      | 0      | 0     | 0     | 0                      | 0      | 0      | 0      | 0      | 0      | 0      | 0      | 0                      | 0      |        |
| 4  | CET                | 0   | 0      | 0      | 0     | 0     | 0                      | 0      | 0      | 0      | 0      | 0      | 0      | 0      | 0                      | 0      |        |
| 5  | SHB                | ad  | 0      | 0      | 0     | 0     | 0                      | 0      | 0.0028 | 0      | 0.0093 | 0      | 0.0013 | 0      | 0.0014                 | 0      |        |
|    |                    | juv | 0      | 0      | 0     | 0     | 0                      | 0      | 0      | 0.0028 | 0.0028 | 0.0093 | 0.0093 | 0.0013 | 0.0013                 | 0.0014 | 0      |
| 6  | SHP                | 0   | 0      | 0      | 0     | 0     | 0                      | 0      | 0      | 0      | 0      | 0      | 0      | 0      | 0                      | 0      |        |
| 7  | SHD                | ad  | 0      | 0      | 0     | 0     | 0                      | 0      | 0      | 0      | 0      | 0      | 0      | 0.0007 | 0                      | 0      | 0      |
|    |                    | juv | 0      | 0      | 0     | 0     | 0                      | 0      | 0      | 0      | 0      | 0      | 0      | 0.0007 | 0.0007                 | 0      | 0      |
| 8  | SSK                | ad  | 0      | 0      | 0     | 0     | 0                      | 0      | 0      | 0      | 0.0175 | 0.0018 | 0.0016 | 0      | 2.98·10 <sup>-06</sup> | 0      |        |
|    |                    | juv | 0      | 0      | 0     | 0     | 0                      | 0      | 0      | 0      | 0.0175 | 0.0175 | 0.0016 | 0.0016 | 2.98·10 <sup>-06</sup> | 0      |        |
| 9  | BFT                | 0   | 0      | 0      | 0     | 0     | 0                      | 0      | 0      | 0      | 0      | 0      | 0      | 0      | 0                      | 0      |        |
| 10 | ALB                | 0   | 0      | 0      | 0     | 0     | 0                      | 0      | 0      | 0      | 0      | 0      | 0      | 0      | 0                      | 0      |        |
| 11 | OPE                | ad  | 0.0001 | 0      | 0.003 | 0     | 0                      | 0.0008 | 0      | 0.0728 | 0.04   | 0.2189 | 0.05   | 0.0472 | 0                      | 0      | 0      |
|    |                    | juv | 0.0001 | 0.0001 | 0.003 | 0.003 | 0                      | 0.0008 | 0.0008 | 0.0728 | 0.0728 | 0.2189 | 0.2189 | 0.0472 | 0.0472                 | 0      | 0      |
| 12 | MAC                | ad  | 0.0003 | 0.0003 | 0.002 | 0.002 | 2.89·10 <sup>-05</sup> | 0.0004 | 0.0002 | 0.0003 | 0.0001 | 0.0009 | 0.0008 | 0.0003 | 0.0001                 | 0      | 0      |
|    |                    | juv | 0.03   | 0.03   | 0.2   | 0.2   | 0.00289                | 0.04   | 0.04   | 0.03   | 0.03   | 0.09   | 0.09   | 0.03   | 0.03                   | 0      | 0      |
| 13 | HOM                | ad  | 0.01   | 0.01   | 0.01  | 0.01  | 0                      | 0.0651 | 0.04   | 0.0081 | 0.006  | 0.0583 | 0.05   | 0.0016 | 0.0009                 | 0.0116 | 0.0116 |
|    |                    | juv | 0.01   | 0.01   | 0.01  | 0.01  | 0                      | 0.0651 | 0.0651 | 0.0081 | 0.0081 | 0.0583 | 0.0583 | 0.0016 | 0.0016                 | 0.0116 | 0.0116 |
| 14 | PIL                | ad  | 0.1    | 0.1    | 0.12  | 0.12  | 0.0106                 | 0.0955 | 0.15   | 0.0215 | 0.04   | 0.0412 | 0.06   | 0      | 0.02                   | 0.0151 | 0.0151 |
|    |                    | juv | 0.1    | 0.1    | 0.12  | 0.12  | 0.0106                 | 0.0955 | 0.0955 | 0.0215 | 0.0215 | 0.0412 | 0.0412 | 0      | 0                      | 0.0151 | 0.0151 |
| 15 | ANE                | ad  | 0.08   | 0.08   | 0.135 | 0.135 | 0.0402                 | 0.0172 | 0.03   | 0.0092 | 0.015  | 0.1143 | 0.2    | 0.0243 | 0.04                   | 0.0009 | 0.0009 |
|    |                    | juv | 0.08   | 0.08   | 0.135 | 0.135 | 0.0402                 | 0.0172 | 0.0172 | 0.0092 | 0.0092 | 0.1143 | 0.1143 | 0.0243 | 0.0243                 | 0.0009 | 0.0009 |
| 16 | OPL                | ad  | 0.2    | 0.2    | 0.25  | 0.25  | 0.15                   | 0.0206 | 0.0206 | 0.017  | 0.017  | 0.1456 | 0.15   | 0.0026 | 0.0026                 | 0.0315 | 0.0315 |
|    |                    | juv | 0.2    | 0.2    | 0.25  | 0.25  | 0.15                   | 0.0206 | 0.0206 | 0.017  | 0.017  | 0.1456 | 0.1456 | 0.0026 | 0.0026                 | 0.0315 | 0.0315 |
| 17 | FMP                | ad  | 0      | 0      | 0     | 0     | 0                      | 0.0025 | 0.0025 | 0      | 0      | 0.0414 | 0.05   | 0.0203 | 0.03                   | 0.0352 | 0.0352 |
|    |                    | juv | 0      | 0      | 0     | 0     | 0                      | 0.0025 | 0.0025 | 0      | 0      | 0.0414 | 0.0414 | 0.0203 | 0.0203                 | 0.0352 | 0.0352 |

Table S7 (continued)

|    | pred<br>prey | 1     |        | 2      |        | 3      | 4                      |        | 5       |        | 6      |        | 7      |        | 8                      |                        |        |
|----|--------------|-------|--------|--------|--------|--------|------------------------|--------|---------|--------|--------|--------|--------|--------|------------------------|------------------------|--------|
|    |              | stage | ad     | juv    | ad     | juv    |                        | ad     | juv     | ad     | juv    | ad     | juv    | ad     | juv                    | ad                     | juv    |
| 18 | ANF          |       | 0      | 0      | 0      | 0      | 0                      | 0      | 0       | 0      | 0      | 0      | 0      | 0      | 0                      | 0                      | 0      |
| 19 | BSS          |       | 0      | 0      | 0      | 0      | 0                      | 0.0081 | 0.0081  | 0      | 0      | 0      | 0      | 0      | 0                      | 0                      | 0      |
| 20 | WHB          | ad    | 0.004  | 0.004  | 0      | 0      | 0                      | 0.1318 | 0.1318  | 0.1732 | 0.1732 | 0      | 0      | 0.1359 | 0.1359                 | 0.0415                 | 0.0415 |
|    |              | juv   | 0.004  | 0.004  | 0      | 0      | 0                      | 0.1318 | 0.1318  | 0.1732 | 0.1732 | 0      | 0      | 0.1359 | 0.1359                 | 0.0415                 | 0.0415 |
| 21 | HKE          | ad    | 0      | 0      | 0      | 0      | 0                      | 0.0076 | 0.0076  | 0      | 0      | 0.0076 | 0      | 0      | 0                      | 0                      | 0      |
|    |              | juv   | 0      | 0      | 0      | 0      | 0                      | 0.0253 | 0.0253  | 0.004  | 0.004  | 0.0197 | 0.0197 | 0.0016 | 0.0016                 | 0.0067                 | 0.0067 |
| 22 | COD          |       | 0.001  | 0.001  | 0      | 0      | 4.95·10 <sup>-05</sup> | 0.0495 | 0.0495  | 0.0148 | 0.0148 | 0      | 0      | 0.0375 | 0.0375                 | 0.0002                 | 0.0002 |
| 23 | MEG          |       | 0      | 0      | 0      | 0      | 0                      | 0      | 0.0059  | 0.0059 | 0      | 0      | 0.0131 | 0.0131 | 1.1·10 <sup>-05</sup>  | 1.1·10 <sup>-05</sup>  |        |
| 24 | SOL          |       | 0      | 0      | 0      | 0      | 0.0033                 | 0.0033 | 0.0013  | 0.0013 | 0      | 0      | 0.0131 | 0.0131 | 1.52·10 <sup>-05</sup> | 1.52·10 <sup>-05</sup> |        |
| 25 | FFL          |       | 0.0002 | 0.0002 | 0.003  | 0.003  | 0                      | 0.003  | 0.003   | 0.0199 | 0.0199 | 0      | 0      | 0.0339 | 0.0339                 | 0.0036                 | 0.0036 |
| 26 | MUL          |       | 0      | 0      | 0      | 0      | 0                      | 0      | 0       | 0      | 0      | 0      | 0.0131 | 0.0131 | 3.31·10 <sup>-05</sup> | 3.31·10 <sup>-05</sup> |        |
| 27 | FDL          | ad    | 0      | 0      | 0      | 0      | 0                      | 0.0112 | 0       | 0.0181 | 0      | 0.0332 | 0      | 0.0105 | 0                      | 0.0001                 | 0      |
|    |              | juv   | 0      | 0      | 0      | 0      |                        | 0.0112 | 0.0112  | 0.0181 | 0.0181 | 0.0332 | 0.0332 | 0.0105 | 0.0105                 | 0.0001                 | 0.0001 |
| 28 | FDM          | ad    | 0.01   | 0      | 0.003  | 0      | 0                      | 0.1192 | 0       | 0.014  | 0      | 0.0802 | 0      | 0.0125 | 0                      | 0.0001                 | 0      |
|    |              | juv   | 0.01   | 0.01   | 0.003  | 0.003  | 0                      | 0.1192 | 0.1192  | 0.014  | 0.014  | 0.0802 | 0.0802 | 0.0125 | 0.0125                 | 0.0001                 | 0.0001 |
| 29 | FDS          | ad    | 0.145  | 0.145  | 0.13   | 0.13   | 0.0306                 | 0.0661 | 0.06612 | 0.03   | 0.04   | 0.0406 | 0.0406 | 0.0365 | 0.03                   | 0.0048                 | 0.008  |
|    |              | juv   | 0.145  | 0.145  | 0.13   | 0.13   | 0.0306                 | 0.0661 | 0.06612 | 0.03   | 0.03   | 0.0406 | 0.0406 | 0.0365 | 0.0365                 | 0.0048                 | 0.0048 |
| 30 | FSD          | ad    | 0      | 0      | 0      | 0      | 0                      | 0.0001 | 0.0001  | 0.0208 | 0      | 0.0588 | 0.0059 | 0.0718 | 0.03                   | 0.0353                 | 0.005  |
|    |              | juv   | 0      | 0      | 0      | 0      | 0                      | 0.0001 | 0.0001  | 0.0208 | 0.0208 | 0.0588 | 0.0588 | 0.0718 | 0.0718                 | 0.0353                 | 0.0353 |
| 31 | CBE          |       | 0      | 0      | 0      | 0      | 0.1279                 | 0.1279 | 0.0277  | 0.02   | 0.0005 | 0.0005 | 0.0554 | 0.03   | 0.0135                 | 0.01                   |        |
| 32 | CBP          |       | 0.02   | 0.02   | 0.014  | 0.014  | 0.0522                 | 0.1931 | 0.1931  | 0.0057 | 0.005  | 0.0239 | 0.0239 | 0.0282 | 0.02                   | 0.016                  | 0.016  |
| 33 | NEP          |       | 0      | 0      | 0.0001 | 0.0001 | 0                      | 0      | 0       | 0.0011 | 0.002  | 0      | 0      | 0.0009 | 0.002                  | 0.5171                 | 0.5171 |
| 34 | CRP          |       | 0      | 0      | 0      | 0      | 0                      | 0      | 0.0784  | 0.0784 | 0.0003 | 0.0003 | 0.0198 | 0.0198 | 0.1236                 | 0.1236                 |        |
| 35 | SHR          |       | 0      | 0      | 0.0001 | 0.0001 | 0                      | 0      | 0       | 0.0385 | 0.045  | 0.0009 | 0.0009 | 0.0584 | 0.06                   | 0.0795                 | 0.1    |
| 36 | DFB          |       | 0      | 0      | 0.0001 | 0.0001 | 0                      | 0      | 0       | 0.1537 | 0.17   | 0      | 0      | 0.0546 | 0.08                   | 0.0341                 | 0.08   |
| 37 | DFD          |       | 0      | 0      | 0.0004 | 0.0004 | 0                      | 0      | 0       | 0.15   | 0.17   | 0      | 0      | 0.0646 | 0.09                   | 0.0018                 | 0.01   |
| 38 | BIV          |       | 0      | 0      | 0      | 0      | 0                      | 0      | 0.0013  | 0.005  | 0.0003 | 0.0003 | 0.0049 | 0.005  | 0.0075                 | 0.01                   |        |
| 39 | POL          |       | 0      | 0      | 0      | 0      | 0                      | 0      | 0.02    | 0.04   | 0.0003 | 0.0003 | 0.0278 | 0.03   | 0.0171                 | 0.03                   |        |

1485

Table S7 (continued)

|    | pred<br>prey | 1     |        | 2      |       | 3     | 4      |                       | 5                     |        | 6      |        | 7      |        | 8      |        |        |
|----|--------------|-------|--------|--------|-------|-------|--------|-----------------------|-----------------------|--------|--------|--------|--------|--------|--------|--------|--------|
|    |              | stage | ad     | juv    | ad    | juv   |        | ad                    | juv                   | ad     | juv    | ad     | juv    | ad     | juv    | ad     | juv    |
| 40 | SB           |       | 0      | 0      | 0     | 0     | 0      | 0                     | 0.005                 | 0.005  | 0      | 0      | 0.075  | 0.09   | 0      | 0      |        |
| 41 | ECH          |       | 0      | 0      | 0     | 0     | 0      | 0                     | 0.0037                | 0.0037 | 0      | 0      | 0.0096 | 0.0096 | 0      | 0      |        |
| 42 | INV          |       | 0      | 0      | 0     | 0     | 0      | 0                     | 0.0071                | 0.01   | 0.0008 | 0.0008 | 0.0089 | 0.0089 | 0      | 0      |        |
| 43 | ZG           |       | 0      | 0      | 0     | 0     | 0.0141 | 0.0097                | 0.0097                | 0.0131 | 0.0131 | 0.0003 | 0.0003 | 0      | 0      | 0      | 0      |
| 44 | ZL           |       | 0.04   | 0.04   | 0.01  | 0.01  | 0.6994 | $4.46 \cdot 10^{-05}$ | $4.46 \cdot 10^{-05}$ | 0.0321 | 0.0321 | 0.0003 | 0.0003 | 0.0775 | 0.0775 | 0.0011 | 0.0011 |
| 45 | ZM           |       | 0.03   | 0.03   | 0.003 | 0.003 | 0      | 0                     | 0                     | 0      | 0.0003 | 0.0003 | 0.0023 | 0.0023 | 0.0001 | 0.0001 |        |
| 46 | ZS           |       | 0      | 0      | 0     | 0     | 0      | 0                     | 0                     | 0      | 0      | 0      | 0      | 0      | 0      | 0      | 0      |
| 47 | PP           |       | 0      | 0      | 0     | 0     | 0      | 0                     | 0.0009                | 0.0009 | 0      | 0      | 0      | 0      | 0      | 0      | 0      |
| 48 | PL           |       | 0      | 0      | 0     | 0     | 0      | 0                     | 0                     | 0      | 0      | 0      | 0      | 0      | 0      | 0      | 0      |
| 49 | PS           |       | 0      | 0      | 0     | 0     | 0      | 0                     | 0                     | 0      | 0      | 0      | 0      | 0      | 0      | 0      | 0      |
| 50 | PB           |       | 0      | 0      | 0     | 0     | 0      | 0                     | 0                     | 0      | 0      | 0      | 0      | 0      | 0      | 0      | 0      |
| 51 | BB           |       | 0      | 0      | 0     | 0     | 0      | 0                     | 0                     | 0      | 0      | 0      | 0      | 0      | 0      | 0      | 0      |
| 52 | DL           |       | 0      | 0      | 0     | 0     | 0      | 0                     | 0                     | 0      | 0      | 0      | 0      | 0      | 0      | 0      | 0      |
| 53 | DR           |       | 0      | 0      | 0     | 0     | 0      | 0                     | 0                     | 0      | 0      | 0      | 0      | 0      | 0      | 0      | 0      |
| 54 | DC           |       | 0.1351 | 0.1351 | 0.1   | 0.1   | 0      | 0                     | 0                     | 0      | 0      | 0      | 0      | 0      | 0      | 0      | 0      |

1490

1495



Table S7 (continued)

|    | pred | 9    |       | 10     |        | 11     |        | 12     |        | 13     |     | 14     |     | 15 |     | 16    |       |
|----|------|------|-------|--------|--------|--------|--------|--------|--------|--------|-----|--------|-----|----|-----|-------|-------|
|    |      | prey | stage | ad     | juv    | ad     | juv    | ad     | juv    | ad     | juv | ad     | juv | ad | juv | ad    | juv   |
| 1  | SBD  |      |       | 0      | 0      | 0      | 0      | 0      | 0      | 0      | 0   | 0      | 0   | 0  | 0   | 0     | 0     |
| 2  | SBS  |      |       | 0      | 0      | 0      | 0      | 0      | 0      | 0      | 0   | 0      | 0   | 0  | 0   | 0     | 0     |
| 3  | BWH  |      |       | 0      | 0      | 0      | 0      | 0      | 0      | 0      | 0   | 0      | 0   | 0  | 0   | 0     | 0     |
| 4  | CET  |      |       | 0      | 0      | 0      | 0      | 0      | 0      | 0      | 0   | 0      | 0   | 0  | 0   | 0     | 0     |
| 5  | SHB  |      | ad    | 0      | 0      | 0      | 0      | 0      | 0      | 0      | 0   | 0      | 0   | 0  | 0   | 0     | 0     |
|    |      |      | juv   | 0      | 0      | 0      | 0      | 0      | 0      | 0      | 0   | 0      | 0   | 0  | 0   | 0     | 0     |
| 6  | SHP  |      |       | 0      | 0      | 0      | 0      | 0      | 0      | 0      | 0   | 0      | 0   | 0  | 0   | 0     | 0     |
| 7  | SHD  |      | ad    | 0      | 0      | 0      | 0      | 0      | 0      | 0      | 0   | 0      | 0   | 0  | 0   | 0     | 0     |
|    |      |      | juv   | 0      | 0      | 0      | 0      | 0      | 0      | 0      | 0   | 0      | 0   | 0  | 0   | 0     | 0     |
| 8  | SSK  |      | ad    | 0      | 0      | 0      | 0      | 0      | 0      | 0      | 0   | 0      | 0   | 0  | 0   | 0     | 0     |
|    |      |      | juv   | 0      | 0      | 0      | 0      | 0      | 0      | 0      | 0   | 0      | 0   | 0  | 0   | 0     | 0     |
| 9  | BFT  |      |       | 0      | 0      | 0      | 0      | 0      | 0      | 0      | 0   | 0      | 0   | 0  | 0   | 0     | 0     |
| 10 | ALB  |      |       | 0      | 0      | 0      | 0      | 0      | 0      | 0      | 0   | 0      | 0   | 0  | 0   | 0     | 0     |
| 11 | OPE  |      | ad    | 0.014  | 0      | 0      | 0      | 0      | 0      | 0      | 0   | 0      | 0   | 0  | 0   | 0     | 0     |
|    |      |      | juv   | 0.014  | 0.014  | 0      | 0      | 0      | 0      | 0      | 0   | 0      | 0   | 0  | 0   | 0     | 0     |
| 12 | MAC  |      | ad    | 0.0002 | 0.0001 | 0.0005 | 0.0001 | 0.0005 | 0.0003 | 0      | 0   | 0      | 0   | 0  | 0   | 0     | 0     |
|    |      |      | juv   | 0.02   | 0.02   | 0.05   | 0.05   | 0.05   | 0.05   | 0      | 0   | 0      | 0   | 0  | 0   | 0     | 0     |
| 13 | HOM  |      | ad    | 0.155  | 0.1    | 0.052  | 0.02   | 0.131  | 0.08   | 0.0026 | 0   | 0      | 0   | 0  | 0   | 0     | 0     |
|    |      |      | juv   | 0.155  | 0.155  | 0.052  | 0.052  | 0.131  | 0.131  | 0.0026 | 0   | 0      | 0   | 0  | 0   | 0     | 0     |
| 14 | PIL  |      | ad    | 0.235  | 0.16   | 0.1    | 0.05   | 0.155  | 0.1    | 0      | 0   | 0.008  | 0   | 0  | 0   | 0     | 0     |
|    |      |      | juv   | 0.235  | 0.235  | 0.1    | 0.1    | 0.155  | 0.155  | 0      | 0   | 0.008  | 0   | 0  | 0   | 0     | 0     |
| 15 | ANE  |      | ad    | 0.236  | 0.17   | 0.1327 | 0.07   | 0.166  | 0.11   | 0.008  | 0   | 0.0107 | 0   | 0  | 0   | 0.002 | 0     |
|    |      |      | juv   | 0.236  | 0.236  | 0.1327 | 0.1327 | 0.166  | 0.166  | 0.008  | 0   | 0.0107 | 0   | 0  | 0   | 0     | 0.002 |
| 16 | OPL  |      | ad    | 0.075  | 0.09   | 0.128  | 0.09   | 0.185  | 0.13   | 0.0023 | 0   | 0.0179 | 0   | 0  | 0   | 0.037 | 0     |
|    |      |      | juv   | 0.075  | 0.075  | 0.128  | 0.128  | 0.185  | 0.185  | 0.0023 | 0   | 0.0179 | 0   | 0  | 0   | 0     | 0.037 |
| 17 | FMP  |      | ad    | 0.024  | 0.024  | 0.0547 | 0.09   | 0.005  | 0.005  | 0      | 0   | 0.005  | 0   | 0  | 0   | 0.015 | 0     |
|    |      |      | juv   | 0.024  | 0.024  | 0.0547 | 0.0547 | 0.005  | 0.005  | 0      | 0   | 0.005  | 0   | 0  | 0   | 0     | 0.015 |

Table S7 (continued)

|    | pred | 9     |       | 10    |        | 11     |       | 12    |        | 13     |        | 14     |    | 15  |    | 16  |        |        |
|----|------|-------|-------|-------|--------|--------|-------|-------|--------|--------|--------|--------|----|-----|----|-----|--------|--------|
|    | prey | stage | ad    | juv   | ad     | juv    | ad    | juv   | ad     | juv    | ad     | juv    | ad | juv | ad | juv | ad     | juv    |
| 18 | ANF  |       | 0     | 0     | 0      | 0      | 0     | 0     | 0      | 0      | 0      | 0      | 0  | 0   | 0  | 0   | 0      | 0      |
| 19 | BSS  |       | 0     | 0     | 0      | 0      | 0     | 0     | 0      | 0      | 0      | 0      | 0  | 0   | 0  | 0   | 0      | 0      |
| 20 | WHB  | ad    | 0.005 | 0.01  | 0.1473 | 0.05   | 0     | 0     | 0.2739 | 0      | 0.06   | 0      | 0  | 0   | 0  | 0   | 0      | 0      |
|    |      | juv   | 0.005 | 0.005 | 0.1473 | 0.1473 | 0     | 0     | 0.2739 | 0      | 0.06   | 0      | 0  | 0   | 0  | 0   | 0      | 0      |
| 21 | HKE  | ad    | 0     | 0     | 0      | 0      | 0     | 0     | 0      | 0      | 0      | 0      | 0  | 0   | 0  | 0   | 0      | 0      |
|    |      | juv   | 0     | 0     | 0      | 0      | 0     | 0     | 0      | 0      | 0      | 0      | 0  | 0   | 0  | 0   | 0      | 0      |
| 22 | COD  |       | 0     | 0     | 0      | 0      | 0     | 0     | 0      | 0      | 0      | 0      | 0  | 0   | 0  | 0   | 0      | 0      |
| 23 | MEG  |       | 0     | 0     | 0      | 0      | 0     | 0     | 0      | 0      | 0      | 0      | 0  | 0   | 0  | 0   | 0      | 0      |
| 24 | SOL  |       | 0     | 0     | 0      | 0      | 0     | 0     | 0      | 0      | 0      | 0      | 0  | 0   | 0  | 0   | 0      | 0      |
| 25 | FFL  |       | 0     | 0     | 0      | 0      | 0     | 0     | 0      | 0      | 0      | 0      | 0  | 0   | 0  | 0   | 0      | 0      |
| 26 | MUL  |       | 0     | 0     | 0      | 0      | 0     | 0     | 0      | 0      | 0      | 0      | 0  | 0   | 0  | 0   | 0      | 0      |
| 27 | FDL  | ad    | 0     | 0     | 0      | 0      | 0     | 0     | 0      | 0      | 0      | 0      | 0  | 0   | 0  | 0   | 0      | 0      |
|    |      | juv   | 0     | 0     | 0      | 0      | 0     | 0     | 0      | 0      | 0      | 0      | 0  | 0   | 0  | 0   | 0      | 0      |
| 28 | FDM  | ad    | 0     | 0     | 0      | 0      | 0.011 | 0     | 0      | 0      | 0      | 0      | 0  | 0   | 0  | 0   | 0      | 0      |
|    |      | juv   | 0     | 0     | 0      | 0      | 0.011 | 0.011 | 0      | 0      | 0      | 0      | 0  | 0   | 0  | 0   | 0      | 0      |
| 29 | FDS  | ad    | 0.017 | 0.017 | 0      | 0      | 0.058 | 0.058 | 0      | 0      | 0.0023 | 0      | 0  | 0   | 0  | 0   | 0      | 0      |
|    |      | juv   | 0.017 | 0.017 | 0      | 0      | 0.058 | 0.058 | 0      | 0      | 0.0023 | 0.0023 | 0  | 0   | 0  | 0   | 0      | 0      |
| 30 | FSD  | ad    | 0.008 | 0.002 | 0      | 0      | 0     | 0     | 0      | 0      | 0      | 0      | 0  | 0   | 0  | 0   | 0      | 0      |
|    |      | juv   | 0.008 | 0.008 | 0      | 0      | 0     | 0     | 0      | 0      | 0      | 0      | 0  | 0   | 0  | 0   | 0      | 0      |
| 31 | CBE  |       | 0.003 | 0.002 | 0      | 0      | 0     | 0     | 0.0001 | 0      | 0      | 0      | 0  | 0   | 0  | 0   | 0      | 0      |
| 32 | CBP  |       | 0.07  | 0.05  | 0.1267 | 0.15   | 0.016 | 0.016 | 0.0009 | 0.0009 | 0.0027 | 0.0027 | 0  | 0   | 0  | 0   | 0.011  | 0.01   |
| 33 | NEP  |       | 0     | 0     | 0      | 0      | 0     | 0     | 0      | 0      | 0      | 0      | 0  | 0   | 0  | 0   | 0      | 0      |
| 34 | CRP  |       | 0.02  | 0.04  | 0.0007 | 0.001  | 0.03  | 0.05  | 0      | 0      | 0.006  | 0.01   | 0  | 0   | 0  | 0   | 0      | 0      |
| 35 | SHR  |       | 0.07  | 0.09  | 0.0247 | 0.03   | 0.03  | 0.08  | 0.0174 | 0.03   | 0.03   | 0.04   | 0  | 0   | 0  | 0   | 0.005  | 0.01   |
| 36 | DFB  |       | 0     | 0     | 0      | 0      | 0     | 0     | 0.0075 | 0.01   | 0.0014 | 0.0014 | 0  | 0   | 0  | 0   | 0.014  | 0.02   |
| 37 | DFD  |       | 0     | 0     | 0      | 0      | 0     | 0     | 0.0076 | 0.015  | 0.0014 | 0.0014 | 0  | 0   | 0  | 0   | 0      | 0      |
| 38 | BIV  |       | 0     | 0     | 0      | 0      | 0     | 0     | 0      | 0      | 0.0028 | 0.0028 | 0  | 0   | 0  | 0   | 0.0003 | 0.0003 |
| 39 | POL  |       | 0     | 0     | 0      | 0      | 0.011 | 0.02  | 0      | 0      | 0.0061 | 0.0061 | 0  | 0   | 0  | 0   | 0.0003 | 0.0003 |

Table S7 (continued)

|    | pred<br>prey | 9     |       | 10    |        | 11   |       | 12   |        | 13     |        | 14     |      | 15   |      | 16     |        |        |
|----|--------------|-------|-------|-------|--------|------|-------|------|--------|--------|--------|--------|------|------|------|--------|--------|--------|
|    |              | stage | ad    | juv   | ad     | juv  | ad    | juv  | ad     | juv    | ad     | juv    | ad   | juv  | ad   | juv    | ad     | juv    |
| 40 | SB           |       | 0     | 0     | 0      | 0    | 0     | 0    | 0.0068 | 0.01   | 0.2154 | 0.2154 | 0    | 0    | 0    | 0      | 0      | 0      |
| 41 | ECH          |       | 0     | 0     | 0      | 0    | 0     | 0    | 0      | 0      | 0      | 0      | 0    | 0    | 0    | 0      | 0      | 0      |
| 42 | INV          |       | 0     | 0     | 0      | 0    | 0     | 0    | 0.0013 | 0.0013 | 0      | 0      | 0    | 0    | 0    | 0      | 0.0009 | 0.0009 |
| 43 | ZG           |       | 0.003 | 0.005 | 0.0447 | 0.05 | 0.03  | 0.03 | 0.095  | 0.12   | 0.05   | 0.06   | 0.04 | 0.02 | 0    | 0      | 0.015  | 0.015  |
| 44 | ZL           |       | 0.039 | 0.012 | 0.112  | 0.18 | 0.061 | 0.14 | 0.3778 | 0.41   | 0.41   | 0.46   | 0.13 | 0.09 | 0.1  | 0.05   | 0.132  | 0.15   |
| 45 | ZM           |       | 0.002 | 0.008 | 0.0267 | 0.04 | 0.06  | 0.1  | 0.1938 | 0.32   | 0.17   | 0.23   | 0.75 | 0.79 | 0.64 | 0.65   | 0.669  | 0.7    |
| 46 | ZS           |       | 0     | 0     | 0      | 0    | 0     | 0    | 0.005  | 0.015  | 0      | 0      | 0    | 0    | 0.2  | 0.25   | 0.085  | 0.09   |
| 47 | PP           |       | 0     | 0     | 0      | 0    | 0     | 0    | 0      | 0      | 0      | 0      | 0    | 0    | 0    | 0      | 0.009  | 0.009  |
| 48 | PL           |       | 0     | 0     | 0      | 0    | 0     | 0    | 0      | 0      | 0      | 0.03   | 0.04 | 0.02 | 0.03 | 0.0015 | 0.002  |        |
| 49 | PS           |       | 0     | 0     | 0      | 0    | 0     | 0    | 0      | 0      | 0      | 0.05   | 0.06 | 0.04 | 0.05 | 0.003  | 0.006  |        |
| 50 | PB           |       | 0     | 0     | 0      | 0    | 0     | 0    | 0      | 0      | 0      | 0      | 0    | 0    | 0    | 0      | 0      | 0      |
| 51 | PS           |       | 0     | 0     | 0      | 0    | 0     | 0    | 0      | 0      | 0      | 0      | 0    | 0    | 0    | 0      | 0      | 0      |
| 52 | DL           |       | 0     | 0     | 0      | 0    | 0     | 0    | 0      | 0      | 0      | 0      | 0    | 0    | 0    | 0      | 0      | 0      |
| 53 | DR           |       | 0     | 0     | 0      | 0    | 0     | 0    | 0      | 0      | 0      | 0      | 0    | 0    | 0    | 0      | 0      | 0      |
| 54 | DC           |       | 0     | 0     | 0      | 0    | 0     | 0    | 0      | 0      | 0      | 0      | 0    | 0    | 0    | 0      | 0      | 0      |

1505

1510

Table S7 (continued)

|    | pred<br>prey | 17    |      | 18   |        | 19     |                       | 20                 |                       | 21      |        | 22    |        | 23     |       | 24     |    |     |
|----|--------------|-------|------|------|--------|--------|-----------------------|--------------------|-----------------------|---------|--------|-------|--------|--------|-------|--------|----|-----|
|    |              | stage | ad   | juv  | ad     | juv    | ad                    | juv                | ad                    | juv     | ad     | juv   | ad     | juv    | ad    | juv    | ad | juv |
| 1  | SBD          |       | 0    | 0    | 0      | 0      | 0                     | 0                  | 0                     | 0       | 0      | 0     | 0      | 0      | 0     | 0      | 0  |     |
| 2  | SBS          |       | 0    | 0    | 0      | 0      | 0                     | 0                  | 0                     | 0       | 0      | 0     | 0      | 0      | 0     | 0      | 0  |     |
| 3  | BWH          |       | 0    | 0    | 0      | 0      | 0                     | 0                  | 0                     | 0       | 0      | 0     | 0      | 0      | 0     | 0      | 0  |     |
| 4  | CET          |       | 0    | 0    | 0      | 0      | 0                     | 0                  | 0                     | 0       | 0      | 0     | 0      | 0      | 0     | 0      | 0  |     |
| 5  | SHB          | ad    | 0    | 0    | 0.0012 | 0      | 0                     | 0                  | 0                     | 0       | 0      | 0     | 0      | 0      | 0     | 0      | 0  |     |
|    |              | juv   | 0    | 0    | 0.0012 | 0.0012 | 0                     | 0                  | 0                     | 0       | 0      | 0     | 0      | 0      | 0     | 0      | 0  |     |
| 6  | SHP          |       | 0    | 0    | 0      | 0      | 0                     | 0                  | 0                     | 0       | 0      | 0     | 0      | 0      | 0     | 0      | 0  |     |
| 7  | SHD          | ad    | 0    | 0    | 0      | 0      | 0                     | 0                  | 0                     | 0       | 0      | 0     | 0      | 0      | 0     | 0      | 0  |     |
|    |              | juv   | 0    | 0    | 0      | 0      | 0                     | 0                  | 0                     | 0       | 0      | 0     | 0      | 0      | 0     | 0      | 0  |     |
| 8  | SSK          | ad    | 0    | 0    | 0.0017 | 0      | 0                     | 0                  | 0                     | 0       | 0      | 0     | 0      | 0      | 0     | 0      | 0  |     |
|    |              | juv   | 0    | 0    | 0.0017 | 0.0017 | 0                     | 0                  | 0                     | 0       | 0      | 0     | 0      | 0      | 0     | 0      | 0  |     |
| 9  | BFT          |       | 0    | 0    | 0      | 0      | 0                     | 0                  | 0                     | 0       | 0      | 0     | 0      | 0      | 0     | 0      | 0  |     |
| 10 | ALB          |       | 0    | 0    | 0      | 0      | 0                     | 0                  | 0                     | 0       | 0      | 0     | 0      | 0      | 0     | 0      | 0  |     |
| 11 | OPE          | ad    | 0    | 0    | 0      | 0      | 0                     | 0                  | 0                     | 0       | 0      | 0     | 0      | 0      | 0     | 0      | 0  |     |
|    |              | juv   | 0    | 0    | 0      | 0      | 0                     | 0                  | 0                     | 0       | 0      | 0     | 0      | 0      | 0     | 0      | 0  |     |
| 12 | MAC          | ad    | 0    | 0    | 0.0015 | 0.0005 | $8.02 \cdot 10^{-05}$ | $4 \cdot 10^{-05}$ | $2.13 \cdot 10^{-05}$ | 0       | 0      | 0     | 0      | 0      | 0     | 0      | 0  |     |
|    |              | juv   | 0    | 0    | 0.15   | 0.15   | 0.802                 | 0.802              | 0.00213               | 0.00213 | 0      | 0     | 0      | 0      | 0     | 0      | 0  |     |
| 13 | HOM          | ad    | 0    | 0    | 0.0287 | 0.005  | 0.402                 | 0.2                | 0.0016                | 0       | 0.0158 | 0.035 | 0      | 0      | 0.003 | 0      | 0  |     |
|    |              | juv   | 0    | 0    | 0.0287 | 0.0287 | 0.402                 | 0.402              | 0.0016                | 0.0016  | 0.0158 | 0.035 | 0      | 0      | 0.003 | 0.003  | 0  | 0   |
| 14 | PIL          | ad    | 0    | 0    | 0      | 0      | 0.148                 | 0.148              | 0                     | 0       | 0.197  | 0     | 0      | 0      | 0     | 0      | 0  |     |
|    |              | juv   | 0    | 0    | 0      | 0      | 0.148                 | 0.148              | 0                     | 0       | 0.197  | 0     | 0      | 0      | 0     | 0      | 0  |     |
| 15 | ANE          | ad    | 0    | 0    | 0      | 0      | 0.204                 | 0.204              | 0                     | 0       | 0.1385 | 0     | 0      | 0      | 0.002 | 0.001  | 0  | 0   |
|    |              | juv   | 0    | 0    | 0      | 0      | 0.204                 | 0.204              | 0                     | 0       | 0.1385 | 0     | 0      | 0      | 0.002 | 0.002  | 0  | 0   |
| 16 | OPL          | ad    | 0    | 0    | 0.031  | 0.02   | 0.042                 | 0.1                | 0.0458                | 0.001   | 0.0167 | 0     | 0.0225 | 0.01   | 0.06  | 0.005  | 0  | 0   |
|    |              | juv   | 0    | 0    | 0.031  | 0.031  | 0.042                 | 0.042              | 0.0458                | 0.0458  | 0.0167 | 0     | 0.0225 | 0.0225 | 0.06  | 0.06   | 0  | 0   |
| 17 | FMP          | ad    | 0.05 | 0    | 0      | 0      | 0                     | 0                  | 0.0399                | 0.004   | 0      | 0     | 0      | 0      | 0.001 | 0.0001 | 0  | 0   |
|    |              | juv   | 0.05 | 0.05 | 0      | 0      | 0                     | 0                  | 0.0399                | 0.0399  | 0      | 0     | 0      | 0      | 0.001 | 0.001  | 0  | 0   |

Table S7 (continued)

|    | pred | 17    |      | 18   |        | 19     |       | 20    |        | 21     |        | 22     |        | 23     |        | 24     |        |        |
|----|------|-------|------|------|--------|--------|-------|-------|--------|--------|--------|--------|--------|--------|--------|--------|--------|--------|
|    | prey | stage | ad   | juv  | ad     | juv    | ad    | juv   | ad     | juv    | ad     | juv    | ad     | juv    | ad     | juv    | ad     | juv    |
| 18 | ANF  |       | 0    | 0    | 0      | 0      | 0     | 0     | 0      | 0      | 0      | 0      | 0      | 0      | 0      | 0      | 0      | 0      |
| 19 | BSS  |       | 0    | 0    | 0      | 0      | 0     | 0     | 0      | 0      | 0      | 0      | 0      | 0      | 0      | 0      | 0      | 0      |
| 20 | WHB  | ad    | 0    | 0    | 0.1161 | 0.06   | 0.066 | 0.066 | 0.0693 | 0      | 0.188  | 0      | 0.0271 | 0.01   | 0.05   | 0      | 0      | 0      |
|    |      | juv   | 0    | 0    | 0.1161 | 0.1161 | 0.066 | 0.066 | 0.0693 | 0.0693 | 0.188  | 0      | 0.0271 | 0.0271 | 0.05   | 0.05   | 0      | 0      |
| 21 | HKE  | ad    | 0    | 0    | 0      | 0      | 0     | 0     | 0      | 0      | 0      | 0      | 0      | 0      | 0      | 0      | 0      | 0      |
|    |      | juv   | 0    | 0    | 0.0866 | 0.0866 | 0.026 | 0.026 | 0.0073 | 0.0073 | 0.1955 | 0.095  | 0.0058 | 0.0058 | 0      | 0      | 0      | 0      |
| 22 | COD  | ad    | 0    | 0    | 0.053  | 0.03   | 0.046 | 0.046 | 0      | 0      | 0.0307 | 0      | 0      | 0      | 0      | 0      | 0      | 0      |
|    |      | juv   | 0    | 0    | 0.053  | 0.053  |       |       |        |        |        |        |        |        |        |        |        |        |
| 23 | MEG  | ad    | 0    | 0    | 0.0265 | 0.01   | 0     | 0     | 0.0035 | 0      | 0      | 0      | 0      | 0      | 0.006  | 0      | 0      | 0      |
|    |      | juv   | 0    | 0    | 0.0265 | 0.0265 |       |       |        |        |        |        |        |        |        |        |        |        |
| 24 | SOL  | ad    | 0    | 0    | 0.1104 | 0.05   | 0.006 | 0.006 | 0      | 0      | 0      | 0      | 0      | 0      | 0      | 0      | 0      | 0      |
|    |      | juv   | 0    | 0    | 0.1104 | 0.1104 |       |       |        |        |        |        |        |        |        |        |        |        |
| 25 | FFL  |       | 0    | 0    | 0      | 0      | 0     | 0     | 0      | 0      | 0      | 0.0152 | 0.005  | 0.01   | 0.005  | 0      | 0      |        |
| 26 | MUL  |       | 0    | 0    | 0      | 0      | 0     | 0     | 0      | 0      | 0      | 0      | 0      | 0      | 0      | 0      | 0      |        |
| 27 | FDL  | ad    | 0    | 0    | 0.024  | 0      | 0.032 | 0     | 0      | 0      | 0      | 0      | 0      | 0      | 0      | 0      | 0      | 0      |
|    |      | juv   | 0    | 0    | 0.024  | 0.024  | 0.032 | 0.032 | 0      | 0      | 0      | 0      | 0      | 0      | 0      | 0      | 0      | 0      |
| 28 | FDM  | ad    | 0    | 0    | 0      | 0      | 0.036 | 0     | 0      | 0.0352 | 0      | 0      | 0      | 0      | 0      | 0      | 0      | 0      |
|    |      | juv   | 0    | 0    | 0      | 0      | 0.036 | 0.036 | 0      | 0      | 0.0352 | 0      | 0      | 0      | 0      | 0      | 0      | 0      |
| 29 | FDS  | ad    | 0    | 0    | 0.062  | 0.07   | 0.1   | 0.14  | 0.0056 | 0.002  | 0.0022 | 0.149  | 0.1258 | 0.1258 | 0.15   | 0.1    | 0.002  | 0.002  |
|    |      | juv   | 0    | 0    | 0.062  | 0.062  | 0.1   | 0.1   | 0.0056 | 0.0056 | 0.0022 | 0.149  | 0.1258 | 0.1258 | 0.15   | 0.15   | 0.002  | 0.002  |
| 30 | FSD  | ad    | 0    | 0    | 0.0206 | 0      | 0     | 0     | 0.0013 | 0      | 0      | 0      | 0.0004 | 0      | 0.0104 | 0      | 0      | 0      |
|    |      | juv   | 0    | 0    | 0.0206 | 0.0206 | 0     | 0     | 0.0013 | 0.0013 | 0      | 0      | 0.0004 | 0.0004 | 0.0104 | 0.0104 | 0      | 0      |
| 31 | CBE  |       | 0    | 0    | 0.0226 | 0.01   | 0.048 | 0.048 | 0.0031 | 0.0031 | 0.001  | 0.041  | 0.0178 | 0.01   | 0.0057 | 0.0057 | 0      | 0      |
| 32 | CBP  |       | 0    | 0    | 0.0008 | 0.0008 | 0.004 | 0.004 | 0.0026 | 0.0026 | 0      | 0      | 0.0068 | 0.0068 | 0.0065 | 0.0065 | 0      | 0      |
| 33 | NEP  |       | 0    | 0    | 0      | 0      | 0     | 0     | 0      | 0      | 0      | 0      | 0      | 0      | 0      | 0      | 0      |        |
| 34 | CRP  |       | 0    | 0    | 0      | 0      | 0     | 0     | 0      | 0      | 0      | 0.0232 | 0.03   | 0.0002 | 0.001  | 0      | 0      |        |
| 35 | SHR  |       | 0    | 0    | 0.001  | 0.01   | 0     | 0     | 0.1515 | 0.1515 | 0.0252 | 0.19   | 0.1663 | 0.18   | 0.0993 | 0.0993 | 0.0129 | 0.0129 |
| 36 | DFB  |       | 0    | 0    | 0.0005 | 0.03   | 0.019 | 0.1   | 0.022  | 0.022  | 0.002  | 0.15   | 0.3211 | 0.33   | 0.1739 | 0.1739 | 0.0769 | 0.05   |
| 37 | DFD  |       | 0    | 0    | 0.0002 | 0.03   | 0.019 | 0.14  | 0.0238 | 0.0238 | 0.002  | 0.022  | 0.176  | 0.18   | 0.0801 | 0.0801 | 0.0129 | 0.0129 |
| 38 | BIV  |       | 0    | 0    | 0      | 0      | 0     | 0     | 0.0005 | 0.0005 | 0      | 0.002  | 0.0048 | 0.0048 | 0.03   | 0.03   | 0.105  | 0.105  |
| 39 | POL  |       | 0.05 | 0.05 | 0      | 0.03   | 0     | 0     | 0      | 0      | 0.0061 | 0      | 0.0152 | 0.0152 | 0.05   | 0.05   | 0.6328 | 0.6328 |

Table S7 (continued)

|    | pred<br>prey stage | 17    |      | 18 |     | 19 |     | 20     |        | 21     |     | 22     |        | 23    |       | 24     |        |
|----|--------------------|-------|------|----|-----|----|-----|--------|--------|--------|-----|--------|--------|-------|-------|--------|--------|
|    |                    | ad    | juv  | ad | juv | ad | juv | ad     | juv    | ad     | juv | ad     | juv    | ad    | juv   | ad     | juv    |
| 40 | SB                 | 0     | 0    | 0  | 0   | 0  | 0   | 0.071  | 0.11   | 0      | 0   | 0.0394 | 0.0394 | 0.05  | 0.05  | 0.095  | 0.0625 |
| 41 | ECH                | 0     | 0    | 0  | 0   | 0  | 0   | 0      | 0      | 0      | 0   | 0.0014 | 0.0014 | 0.04  | 0.04  | 0.0625 | 0      |
| 42 | INV                | 0.05  | 0.05 | 0  | 0   | 0  | 0   | 0.0016 | 0.0016 | 0      | 0   | 0.0016 | 0.0016 | 0.047 | 0.047 | 0      | 0      |
| 43 | ZG                 | 0.07  | 0.07 | 0  | 0   | 0  | 0   | 0.0001 | 0.0001 | 0      | 0   | 0      | 0      | 0     | 0     | 0      | 0      |
| 44 | ZL                 | 0.102 | 0.11 | 0  | 0   | 0  | 0   | 0.43   | 0.47   | 0.0077 | 0   | 0.025  | 0.055  | 0.065 | 0.065 | 0      | 0      |
| 45 | ZM                 | 0.567 | 0.6  | 0  | 0   | 0  | 0   | 0.0691 | 0.09   | 0      | 0   | 0.0021 | 0.01   | 0     | 0     | 0      | 0      |
| 46 | ZS                 | 0.111 | 0.15 | 0  | 0   | 0  | 0   | 0.048  | 0.068  | 0      | 0   | 0      | 0.005  | 0     | 0     | 0      | 0      |
| 47 | PP                 | 0     | 0    | 0  | 0   | 0  | 0   | 0      | 0      | 0      | 0   | 0.0019 | 0.0019 | 0     | 0     | 0      | 0      |
| 48 | PL                 | 0     | 0    | 0  | 0   | 0  | 0   | 0      | 0      | 0      | 0   | 0      | 0      | 0     | 0     | 0      | 0      |
| 49 | PS                 | 0     | 0    | 0  | 0   | 0  | 0   | 0      | 0      | 0      | 0   | 0      | 0      | 0     | 0     | 0      | 0      |
| 50 | PB                 | 0     | 0    | 0  | 0   | 0  | 0   | 0      | 0      | 0      | 0   | 0      | 0      | 0     | 0     | 0      | 0      |
| 51 | BB                 | 0     | 0    | 0  | 0   | 0  | 0   | 0      | 0      | 0      | 0   | 0      | 0      | 0     | 0     | 0      | 0      |
| 52 | DL                 | 0     | 0    | 0  | 0   | 0  | 0   | 0      | 0      | 0      | 0   | 0      | 0      | 0.03  | 0.04  | 0      | 0      |
| 53 | DR                 | 0     | 0    | 0  | 0   | 0  | 0   | 0      | 0      | 0      | 0   | 0      | 0      | 0.03  | 0.04  | 0      | 0      |
| 54 | DC                 | 0     | 0    | 0  | 0   | 0  | 0   | 0      | 0      | 0      | 0   | 0      | 0      | 0     | 0     | 0      | 0      |

Table S7 (continued)

|    | pred<br>prey | 25    |        | 26     |    | 27  |        | 28     |       | 29    |        | 30     |        |
|----|--------------|-------|--------|--------|----|-----|--------|--------|-------|-------|--------|--------|--------|
|    |              | stage | ad     | juv    | ad | juv | ad     | juv    | ad    | juv   | ad     | juv    | ad     |
| 1  | SBD          |       | 0      | 0      | 0  | 0   | 0      | 0      | 0     | 0     | 0      | 0      | 0      |
| 2  | SBS          |       | 0      | 0      | 0  | 0   | 0      | 0      | 0     | 0     | 0      | 0      | 0      |
| 3  | BWH          |       | 0      | 0      | 0  | 0   | 0      | 0      | 0     | 0     | 0      | 0      | 0      |
| 4  | CET          |       | 0      | 0      | 0  | 0   | 0      | 0      | 0     | 0     | 0      | 0      | 0      |
| 5  | SHB          | ad    | 0      | 0      | 0  | 0   | 0.002  | 0      | 0     | 0     | 0      | 0      | 0      |
|    |              | juv   | 0      | 0      | 0  | 0   | 0.002  | 0.002  | 0     | 0     | 0      | 0      | 0      |
| 6  | SHP          |       | 0      | 0      | 0  | 0   | 0      | 0      | 0     | 0     | 0      | 0      | 0      |
| 7  | SHD          | ad    | 0      | 0      | 0  | 0   | 0.0002 | 0      | 0     | 0     | 0      | 0      | 0      |
|    |              | juv   | 0      | 0      | 0  | 0   | 0.0002 | 0.0002 | 0     | 0     | 0      | 0      | 0      |
| 8  | SSK          | ad    | 0      | 0      | 0  | 0   | 0      | 0      | 0     | 0     | 0      | 0      | 0      |
|    |              | juv   | 0      | 0      | 0  | 0   | 0      | 0      | 0     | 0     | 0      | 0      | 0      |
| 9  | BFT          |       | 0      | 0      | 0  | 0   | 0      | 0      | 0     | 0     | 0      | 0      | 0      |
| 10 | ALB          |       | 0      | 0      | 0  | 0   | 0      | 0      | 0     | 0     | 0      | 0      | 0      |
| 11 | OPE          | ad    | 0      | 0      | 0  | 0   | 0      | 0      | 0     | 0     | 0      | 0      | 0      |
|    |              | juv   | 0      | 0      | 0  | 0   | 0      | 0      | 0     | 0     | 0      | 0      | 0      |
| 12 | MAC          | ad    | 0      | 0      | 0  | 0   | 0      | 0      | 0     | 0     | 0      | 0      | 0      |
|    |              | juv   | 0      | 0      | 0  | 0   | 0      | 0      | 0     | 0     | 0      | 0      | 0      |
| 13 | HOM          | ad    | 0      | 0      | 0  | 0   | 0.0368 | 0.02   | 0     | 0     | 0      | 0      | 0      |
|    |              | juv   | 0      | 0      | 0  | 0   | 0.0368 | 0.0368 | 0     | 0     | 0      | 0      | 0      |
| 14 | PIL          | ad    | 0.0068 | 0.003  | 0  | 0   | 0.0381 | 0.02   | 0     | 0     | 0      | 0      | 0      |
|    |              | juv   | 0.0068 | 0.0068 | 0  | 0   | 0.0381 | 0.0381 | 0     | 0     | 0      | 0      | 0      |
| 15 | ANE          | ad    | 0      | 0      | 0  | 0   | 0.0352 | 0.01   | 0.004 | 0.001 | 0      | 0      | 0      |
|    |              | juv   | 0      | 0      | 0  | 0   | 0.0352 | 0.0352 | 0.004 | 0.004 | 0      | 0      | 0      |
| 16 | OPL          | ad    | 0.002  | 0.001  | 0  | 0   | 0.0925 | 0.08   | 0.055 | 0.03  | 0.0256 | 0.001  | 0      |
|    |              | juv   | 0.002  | 0.002  | 0  | 0   | 0.0925 | 0.0925 | 0.055 | 0.055 | 0.0256 | 0.0256 | 0      |
| 17 | FMP          | ad    | 0      | 0      | 0  | 0   | 0.0376 | 0.03   | 0.005 | 0.003 | 0      | 0      | 0.0675 |
|    |              | juv   | 0      | 0      | 0  | 0   | 0.0376 | 0.0376 | 0.005 | 0.005 | 0      | 0      | 0.0675 |

Table S7 (continued)

|    | pred<br>prey stage | 25     |        | 26     |        | 27     |        | 28     |        | 29     |        | 30     |        |        |
|----|--------------------|--------|--------|--------|--------|--------|--------|--------|--------|--------|--------|--------|--------|--------|
|    |                    | ad     | juv    |        |
| 18 | ANF                | 0      | 0      | 0      | 0      | 0      | 0      | 0      | 0      | 0      | 0      | 0      | 0      |        |
| 19 | BSS                | 0.0057 | 0      | 0      | 0      | 0      | 0      | 0      | 0      | 0      | 0      | 0      | 0      |        |
| 20 | WHB                | ad     | 0      | 0      | 0      | 0      | 0.2111 | 0.1    | 0.078  | 0.03   | 0.0009 | 0.0001 | 0      | 0      |
|    |                    | juv    | 0      | 0      | 0      | 0      | 0.2111 | 0.2111 | 0.078  | 0.078  | 0.0009 | 0.0009 | 0      | 0      |
| 21 | HKE                | ad     | 0      | 0      | 0      | 0      | 0      | 0      | 0      | 0      | 0      | 0      | 0      | 0      |
|    |                    | juv    | 0      | 0      | 0      | 0      | 0.019  | 0.019  | 0      | 0      | 0      | 0      | 0      | 0      |
| 22 | COD                |        | 0      | 0      | 0      | 0      | 0.1072 | 0.05   | 0      | 0      | 0      | 0      | 0      | 0      |
| 23 | MEG                |        | 0      | 0      | 0      | 0      | 0.0032 | 0.002  | 0      | 0      | 0      | 0      | 0      | 0      |
| 24 | SOL                |        | 0.0097 | 0      | 0      | 0      | 0      | 0      | 0      | 0      | 0      | 0      | 0      | 0      |
| 25 | FFL                |        | 0      | 0      | 0      | 0      | 0.0162 | 0.01   | 0.0041 | 0.004  | 0.0077 | 0.0008 | 0      | 0      |
| 26 | MUL                |        | 0      | 0      | 0      | 0      | 0      | 0      | 0      | 0      | 0      | 0      | 0      | 0      |
| 27 | FDL                | ad     | 0      | 0      | 0      | 0      | 0.0093 | 0      | 0.0016 | 0      | 0      | 0      | 0      | 0      |
|    |                    | juv    | 0      | 0      | 0      | 0      | 0.0093 | 0.0093 | 0.0016 | 0.0016 | 0      | 0      | 0      | 0      |
| 28 | FDM                | ad     | 0.0031 | 0      | 0      | 0      | 0.012  | 0      | 0.0161 | 0      | 0      | 0      | 0.01   | 0.0001 |
|    |                    | juv    | 0.0031 | 0.0031 | 0      | 0      | 0.012  | 0.012  | 0.0161 | 0.0161 | 0      | 0      | 0.01   | 0.01   |
| 29 | FDS                | ad     | 0.1624 | 0.1    | 0.0038 | 0.0038 | 0.1319 | 0.12   | 0.1054 | 0.07   | 0.0143 | 0.005  | 0.02   | 0.01   |
|    |                    | juv    | 0.1624 | 0.1624 | 0.0038 | 0.0038 | 0.1319 | 0.1319 | 0.1054 | 0.1054 | 0.0143 | 0.0143 | 0.02   | 0.02   |
| 30 | FSD                | ad     | 0      | 0      | 0      | 0      | 0.056  | 0      | 0.0022 | 0      | 0      | 0      | 0      | 0      |
|    |                    | juv    | 0      | 0      | 0      | 0      | 0.056  | 0.056  | 0.0022 | 0.0022 | 0      | 0      | 0      | 0      |
| 31 | CBE                |        | 0.0372 | 0.0372 | 0.0095 | 0.0095 | 0.0063 | 0.0063 | 0.0088 | 0.0088 | 0.0157 | 0.01   | 0.02   | 0.02   |
| 32 | CBP                |        | 0.035  | 0.035  | 0      | 0      | 0.0147 | 0.0147 | 0.007  | 0.007  | 0.0291 | 0.02   | 0.016  | 0.016  |
| 33 | NEP                |        | 0      | 0      | 0      | 0      | 0.0005 | 0.0005 | 0      | 0      | 0      | 0      | 0.014  | 0.014  |
| 34 | CRP                |        | 0      | 0      | 0      | 0      | 0.0051 | 0.01   | 0.086  | 0.09   | 0.108  | 0.08   | 0      | 0      |
| 35 | SHR                |        | 0.0694 | 0.07   | 0.1429 | 0.1429 | 0.0897 | 0.1    | 0.0662 | 0.11   | 0.0285 | 0.04   | 0.2327 | 0.25   |
| 36 | DFB                |        | 0.0642 | 0.08   | 0.1497 | 0.08   | 0.03   | 0.04   | 0.1763 | 0.21   | 0.0815 | 0.07   | 0.1842 | 0.19   |
| 37 | DFD                |        | 0.0671 | 0.09   | 0.0252 | 0.0252 | 0.0238 | 0.05   | 0.1562 | 0.2    | 0.0996 | 0.09   | 0.0935 | 0.11   |
| 38 | BIV                |        | 0.0613 | 0.07   | 0.0248 | 0.0248 | 0.0001 | 0.005  | 0.0454 | 0.06   | 0.0377 | 0.04   | 0      | 0      |
| 39 | POL                |        | 0.1851 | 0.1851 | 0.4975 | 0.4975 | 0.0121 | 0.04   | 0.0243 | 0.04   | 0.1117 | 0.16   | 0.0307 | 0.14   |



Table S7 (continued)

|    | prey | pred  |        | 25     |        | 26     |        | 27    |                       | 28                    |        | 29     |        | 30     |  |
|----|------|-------|--------|--------|--------|--------|--------|-------|-----------------------|-----------------------|--------|--------|--------|--------|--|
|    |      | stage | ad     | juv    | ad     | juv    | ad     | juv   | ad                    | juv                   | ad     | juv    | ad     | juv    |  |
| 40 | SB   |       | 0.2239 | 0.2239 | 0.1018 | 0.2    | 0.0014 | 0.02  | 0.0651                | 0.09                  | 0.0437 | 0.11   | 0.109  | 0.19   |  |
| 41 | ECH  |       | 0.0443 | 0.0443 | 0.033  | 0.033  | 0      | 0     | 0.0152                | 0.03                  | 0.0796 | 0.06   | 0.01   | 0.01   |  |
| 42 | INV  |       | 0.0088 | 0.0088 | 0.009  | 0.009  | 0      | 0     | 0.0359                | 0.06                  | 0.0392 | 0.05   | 0.0279 | 0.04   |  |
| 43 | ZG   |       | 0      | 0      | 0      | 0      | 0      | 0     | 0.0174                | 0.0174                | 0.0064 | 0.0064 | 0.0734 | 0.0734 |  |
| 44 | ZL   |       | 0.0065 | 0.0065 | 0.0013 | 0.0013 | 0.0007 | 0.007 | 0.0097                | 0.011                 | 0.0184 | 0.03   | 0.0721 | 0.08   |  |
| 45 | ZM   |       | 0.0065 | 0.0065 | 0      | 0      | 0.0071 | 0.01  | 0.0059                | 0.007                 | 0.0214 | 0.034  | 0.0189 | 0.03   |  |
| 46 | ZS   |       | 0      | 0      | 0      | 0      | 0      | 0     | 0.0073                | 0.009                 | 0.0036 | 0.01   | 0      | 0      |  |
| 47 | PP   |       | 0      | 0      | 0.0018 | 0.0018 | 0      | 0     | 0.002                 | 0.002                 | 0.004  | 0.01   | 0      | 0      |  |
| 48 | PL   |       | 0      | 0      | 0      | 0      | 0      | 0     | 0                     | 0                     | 0.0884 | 0.0884 | 0      | 0      |  |
| 49 | PS   |       | 0      | 0      | 0      | 0      | 0      | 0     | 0                     | 0                     | 0.0442 | 0.0442 | 0      | 0      |  |
| 50 | PB   |       | 0      | 0      | 0      | 0      | 0      | 0     | 0                     | 0                     | 0      | 0      | 0      | 0      |  |
| 51 | BB   |       | 0      | 0      | 0      | 0      | 0      | 0     | 0                     | 0                     | 0      | 0      | 0      | 0      |  |
| 52 | DL   |       | 0.0004 | 0.0004 | 0      | 0      | 0      | 0     | $9.08 \cdot 10^{-05}$ | $9.08 \cdot 10^{-05}$ | 0.0454 | 0.055  | 0      | 0      |  |
| 53 | DR   |       | 0.0004 | 0.0004 | 0      | 0      | 0      | 0     | $9.08 \cdot 10^{-05}$ | $9.08 \cdot 10^{-05}$ | 0.0454 | 0.055  | 0      | 0      |  |
| 54 | DC   |       | 0      | 0      | 0      | 0      | 0      | 0     | 0                     | 0                     | 0      | 0      | 0      | 0      |  |

Table S7 (continued)

|        | 31     | 32     | 33 | 34 | 35     | 36     | 37 | 38 | 39 | 40 | 41 | 42 | 43 | 44 | 45 | 46 |
|--------|--------|--------|----|----|--------|--------|----|----|----|----|----|----|----|----|----|----|
| 1 SBD  | 0      | 0      | 0  | 0  | 0      | 0      | 0  | 0  | 0  | 0  | 0  | 0  | 0  | 0  | 0  | 0  |
| 2 SBS  | 0      | 0      | 0  | 0  | 0      | 0      | 0  | 0  | 0  | 0  | 0  | 0  | 0  | 0  | 0  | 0  |
| 3 BWH  | 0      | 0      | 0  | 0  | 0      | 0      | 0  | 0  | 0  | 0  | 0  | 0  | 0  | 0  | 0  | 0  |
| 4 CET  | 0      | 0      | 0  | 0  | 0      | 0      | 0  | 0  | 0  | 0  | 0  | 0  | 0  | 0  | 0  | 0  |
| 5 SHB  | 0      | 0      | 0  | 0  | 0      | 0      | 0  | 0  | 0  | 0  | 0  | 0  | 0  | 0  | 0  | 0  |
| 6 SHP  | 0      | 0      | 0  | 0  | 0      | 0      | 0  | 0  | 0  | 0  | 0  | 0  | 0  | 0  | 0  | 0  |
| 7 SHD  | 0      | 0      | 0  | 0  | 0      | 0      | 0  | 0  | 0  | 0  | 0  | 0  | 0  | 0  | 0  | 0  |
| 8 SSK  | 0      | 0      | 0  | 0  | 0      | 0      | 0  | 0  | 0  | 0  | 0  | 0  | 0  | 0  | 0  | 0  |
| 9 BFT  | 0      | 0      | 0  | 0  | 0      | 0      | 0  | 0  | 0  | 0  | 0  | 0  | 0  | 0  | 0  | 0  |
| 10 ALB | 0      | 0      | 0  | 0  | 0      | 0      | 0  | 0  | 0  | 0  | 0  | 0  | 0  | 0  | 0  | 0  |
| 11 BFT | 0      | 0      | 0  | 0  | 0      | 0      | 0  | 0  | 0  | 0  | 0  | 0  | 0  | 0  | 0  | 0  |
| 12 MAC | 0      | 0.0002 | 0  | 0  | 0      | 0      | 0  | 0  | 0  | 0  | 0  | 0  | 0  | 0  | 0  | 0  |
| 13 HOM | 0      | 0.04   | 0  | 0  | 0      | 0      | 0  | 0  | 0  | 0  | 0  | 0  | 0  | 0  | 0  | 0  |
| 14 PIL | 0.0007 | 0.06   | 0  | 0  | 0      | 0      | 0  | 0  | 0  | 0  | 0  | 0  | 0  | 0  | 0  | 0  |
| 15 ANE | 0.039  | 0.09   | 0  | 0  | 0      | 0      | 0  | 0  | 0  | 0  | 0  | 0  | 0  | 0  | 0  | 0  |
| 16 OPL | 0.0007 | 0.1    | 0  | 0  | 0      | 0      | 0  | 0  | 0  | 0  | 0  | 0  | 0  | 0  | 0  | 0  |
| 17 FMP | 0.0022 | 0.2    | 0  | 0  | 0.0087 | 0      | 0  | 0  | 0  | 0  | 0  | 0  | 0  | 0  | 0  | 0  |
| 18 ANF | 0      | 0      | 0  | 0  | 0      | 0      | 0  | 0  | 0  | 0  | 0  | 0  | 0  | 0  | 0  | 0  |
| 19 BSS | 0      | 0      | 0  | 0  | 0      | 0      | 0  | 0  | 0  | 0  | 0  | 0  | 0  | 0  | 0  | 0  |
| 20 WHB | 0      | 0.05   | 0  | 0  | 0      | 0      | 0  | 0  | 0  | 0  | 0  | 0  | 0  | 0  | 0  | 0  |
| 21 HKE | 0      | 0.02   | 0  | 0  | 0      | 0      | 0  | 0  | 0  | 0  | 0  | 0  | 0  | 0  | 0  | 0  |
| 22 COD | 0      | 0.03   | 0  | 0  | 0      | 0      | 0  | 0  | 0  | 0  | 0  | 0  | 0  | 0  | 0  | 0  |
| 23 MEG | 0      | 0      | 0  | 0  | 0      | 0      | 0  | 0  | 0  | 0  | 0  | 0  | 0  | 0  | 0  | 0  |
| 24 SOL | 0      | 0      | 0  | 0  | 0      | 0      | 0  | 0  | 0  | 0  | 0  | 0  | 0  | 0  | 0  | 0  |
| 25 FFL | 0.0293 | 0.004  | 0  | 0  | 0      | 0      | 0  | 0  | 0  | 0  | 0  | 0  | 0  | 0  | 0  | 0  |
| 26 MUL | 0.0674 | 0.003  | 0  | 0  | 0      | 0      | 0  | 0  | 0  | 0  | 0  | 0  | 0  | 0  | 0  | 0  |
| 27 FDL | 0      | 0      | 0  | 0  | 0      | 0      | 0  | 0  | 0  | 0  | 0  | 0  | 0  | 0  | 0  | 0  |
| 28 FDM | 0      | 0      | 0  | 0  | 0      | 0      | 0  | 0  | 0  | 0  | 0  | 0  | 0  | 0  | 0  | 0  |
| 29 FDS | 0.1765 | 0.2    | 0  | 0  | 0      | 0.0076 | 0  | 0  | 0  | 0  | 0  | 0  | 0  | 0  | 0  | 0  |

Table S7 (continued)

|    |     | 31                    | 32                 | 33     | 34     | 35     | 36     | 37     | 38    | 39    | 40   | 41     | 42    | 43                 | 44                 | 45                 | 46                 |
|----|-----|-----------------------|--------------------|--------|--------|--------|--------|--------|-------|-------|------|--------|-------|--------------------|--------------------|--------------------|--------------------|
| 30 | FSD | 0.0081                | 0.04               | 0      | 0      | 0      | 0      | 0      | 0     | 0     | 0    | 0      | 0     | 0                  | 0                  | 0                  | 0                  |
| 31 | CBE | $5.67 \cdot 10^{-07}$ | 0.00011            | 0.0035 | 0      | 0      | 0.0028 | 0      | 0     | 0     | 0    | 0      | 0     | 0                  | 0                  | 0                  | 0                  |
| 32 | CBP | 0.0002                | $5 \cdot 10^{-07}$ | 0      | 0.0169 | 0.0069 | 0.0007 | 0      | 0     | 0     | 0    | 0      | 0     | 0                  | 0                  | 0                  | 0                  |
| 33 | NEP | 0.0128                | 0.004              | 0.0005 | 0      | 0      | 0      | 0      | 0     | 0     | 0    | 0      | 0     | 0                  | 0                  | 0                  | 0                  |
| 34 | CRP | 0.0128                | 0.07               | 0      | 0.0581 | 0      | 0      | 0      | 0     | 0     | 0    | 0      | 0     | 0                  | 0                  | 0                  | 0                  |
| 35 | SHR | 0.0357                | 0.2                | 0.0822 | 0.0199 | 0.0451 | 0.0365 | 0.039  | 0     | 0     | 0    | 0      | 0     | 0                  | 0                  | 0                  | 0                  |
| 36 | DFB | 0.1419                | 0.02               | 0.0691 | 0.028  | 0.0432 | 0.035  | 0.0382 | 0     | 0     | 0    | 0      | 0     | 0                  | 0                  | 0                  | 0                  |
| 37 | DFD | 0.1107                | 0.02               | 0.0478 | 0.0056 | 0.0044 | 0.0311 | 0.0372 | 0     | 0     | 0    | 0      | 0     | 0                  | 0                  | 0                  | 0                  |
| 38 | BIV | 0.2321                | 0                  | 0.057  | 0      | 0.0439 | 0.0791 | 0.0152 | 0     | 0     | 0    | 0.01   | 0     | 0                  | 0                  | 0                  | 0                  |
| 39 | POL | 0.0266                | 0.04               | 0.2035 | 0.0901 | 0.0977 | 0.2541 | 0.0726 | 0     | 0.03  | 0.02 | 0.005  | 0     | 0                  | 0                  | 0                  | 0                  |
| 40 | SB  | 0.0172                | 0.04               | 0.0506 | 0.0439 | 0.1995 | 0.1019 | 0.0724 | 0     | 0.01  | 0.03 | 0      | 0.01  | 0                  | 0                  | 0                  | 0                  |
| 41 | ECH | 0.00007               | 0                  | 0.0439 | 0      | 0.0233 | 0.0606 | 0.027  | 0     | 0.005 | 0    | 0      | 0     | 0                  | 0                  | 0                  | 0                  |
| 42 | INV | 0.0063                | 0.006              | 0.0581 | 0.0015 | 0.0598 | 0.1355 | 0.0302 | 0     | 0.015 | 0.03 | 0.04   | 0.03  | 0                  | 0                  | 0                  | 0                  |
| 43 | ZG  | 0                     | 0                  | 0      | 0.1126 | 0.0605 | 0.0293 | 0.0418 | 0.02  | 0     | 0    | 0      | 0     | $1 \cdot 10^{-07}$ | 0.02               | 0                  | 0                  |
| 44 | ZL  | 0.0059                | 0.03               | 0.1285 | 0.0582 | 0.0474 | 0.0463 | 0.02   | 0.02  | 0     | 0    | 0      | 0.01  | 0.07               | $3 \cdot 10^{-07}$ | 0                  | 0                  |
| 45 | ZM  | 0                     | 0.03               | 0.034  | 0.0604 | 0.1039 | 0.0293 | 0.022  | 0.03  | 0     | 0.04 | 0      | 0.03  | 0.52               | 0.0006             | $2 \cdot 10^{-07}$ | 0                  |
| 46 | ZS  | 0                     | 0                  | 0      | 0      | 0.0052 | 0      | 0      | 0.03  | 0     | 0.03 | 0      | 0.03  | 0.2                | 0.0006             | 0.25               | $2 \cdot 10^{-07}$ |
| 47 | PP  | 0                     | 0                  | 0      | 0      | 0      | 0.0357 | 0.0147 | 0     | 0     | 0    | 0.035  | 0.005 | 0                  | 0                  | 0                  | 0                  |
| 48 | PL  | 0                     | 0                  | 0      | 0      | 0      | 0      | 0      | 0.57  | 0     | 0    | 0      | 0.02  | 0.1                | 0.1                | 0.37               | 0.34               |
| 49 | PS  | 0                     | 0                  | 0      | 0      | 0      | 0      | 0      | 0.18  | 0     | 0    | 0      | 0.01  | 0.05               | 0.05               | 0.21               | 0.005              |
| 50 | PB  | 0                     | 0                  | 0      | 0      | 0      | 0      | 0      | 0     | 0     | 0    | 0      | 0     | 0                  | 0                  | 0                  | 0.065              |
| 51 | BB  | 0                     | 0                  | 0      | 0      | 0      | 0      | 0      | 0     | 0     | 0    | 0      | 0     | 0                  | 0                  | 0                  | 0.065              |
| 52 | DL  | 0                     | 0.0005             | 0.0868 | 0.041  | 0.1023 | 0.0303 | 0.2064 | 0.075 | 0.47  | 0.42 | 0.4525 | 0.425 | 0.025              | 0.025              | 0.075              | 0.165              |
| 53 | DR  | 0                     | 0.0005             | 0.0868 | 0.041  | 0.1023 | 0.0303 | 0.2064 | 0.075 | 0.47  | 0.42 | 0.4525 | 0.425 | 0.025              | 0.025              | 0.075              | 0.165              |
| 54 | DC  | 0                     | 0                  | 0.048  | 0.423  | 0.0461 | 0.0539 | 0.1567 | 0     | 0     | 0.01 | 0.005  | 0.005 | 0                  | 0                  | 0                  | 0                  |

1550

## Section S5 – Calibration process related figures and tables of the Bay of Biscay Atlantis model.

**Table S8.** Overview of runs during the calibration process of the Bay of Biscay Atlantis model. Column description: 1) Parameter pert.: perturbed parameter in the simulation: KWSR\_XXX: recruits structural weight (mgN) of XXX, KWRR\_XXX: recruits reserve weight (mgN) of XXX, mum\_XXX: maximum growth rate (mgN) gained per day of XXX, C\_XXX: clearance rate of XXX; BAlpha\_XXX: Beverton-Holt recruitment function alpha parameter; pPREYYYY\_XXX: maximum availability of prey YYY to a predator XXX; XXX\_mL: linear mortality term of XXX, jmQ\_XXX: quadratic mortality term of juvenile XXX, mQ\_XXX: quadratic mortality term of adult XXX; 2) Original value: parameter value in the non-calibrated model; 3) Final value: parameter value in the calibrated model.

| Sim. name | Description                                                        | Parameter pert. | Original value | Final value        |
|-----------|--------------------------------------------------------------------|-----------------|----------------|--------------------|
| Run 00    | Non calibrated model                                               | -               |                |                    |
| Run 01    | Adjusted NH3 intial values                                         | NH3             | -              | NO3 value          |
| Run 02    | Increased NO3 intial values                                        | NO3             | -              | Original value * 9 |
| Run 03    | Same small phytoplankton initial values per box and layer          | SmallPhyto_N    | 0-0.00496      | 0.1                |
| Run 04    | Same large phytoplankton initial values per box and layer          | LargePhyto_N    | 0-0.0044       | 0.1                |
| Run 05    | Added linear mortality for small phytoplankton                     | PS_mL           | 0              | 0.02               |
| Run 06    | Decreased microzooplankton-small phytoplankton diet link           | pPREYPS-ZS      | 0.31           | 0.005              |
| Run 07    | Added linear mortality for microzooplankton                        | ZS_mL           | 0              | 0.0001             |
| Run 08    | Decreased cannibalism value in the diet for microzooplankton       | pPREYZS-ZS      | 0.02           | $2 \cdot 10^{-07}$ |
| Run 09    | Decreased cannibalism value in the diet for mesozooplankton        | pPREYZM-ZM      | 0.02           | $2 \cdot 10^{-07}$ |
| Run 10    | Decreased cannibalism value in the diet for macrozooplankton       | pPREYZL-ZL      | 0.03           | $3 \cdot 10^{-07}$ |
| Run 11    | Decreased macrozooplankton-mesozooplankton diet link               | pPREYZM-ZL      | 0.6            | 0.0006             |
| Run 12    | Added macrozooplankton-microzooplankton diet link                  | pPREYZS-ZL      | 0              | 0.0006             |
| Run 13    | Increased growth rate for gelatinous zooplankton                   | mum_ZG          | 0.008          | 0.02               |
| Run 14    | Decreased cannibalism value in the diet for gelatinous zooplankton | pPREYZG-ZG      | 0.01           | $1 \cdot 10^{-07}$ |
| Run 15    | Increased growth rate for other invertebrates                      | mum_INV         | 0.02           | 0.04               |
| Run 16    | Decreased growth rate for echinoderms                              | mum_ECH         | 0.02           | 0.005              |
| Run 17    | Increased growth rate for zooplankton feeding shrimps              | mum_SHR         | 0.0000001      | 0.0001             |

Table S8 (continued)

| Sim. name | Description                                                              | Parameter pert.       | Original value                                                                | Final value                                                                           |
|-----------|--------------------------------------------------------------------------|-----------------------|-------------------------------------------------------------------------------|---------------------------------------------------------------------------------------|
| Run 18    | Decreased growth rate for Norway lobster                                 | mum_NEP               | 0.05                                                                          | 0.006                                                                                 |
| Run 19    | Decreased growth rate for squids                                         | mum_CBP               | 0.01                                                                          | 0.0006                                                                                |
| Run 20    | Decreased squids-benthic cephalopods diet link                           | pPREYCBP-CBP          | 0.011                                                                         | 0.00011                                                                               |
| Run 21    | Decreased cannibalism value in the diet for squids                       | pPREYCBP-CBP          | 0.05                                                                          | $5 \cdot 10^{-07}$                                                                    |
| Run 22    | Increased diet values for squids                                         | pPREYCBP              | -                                                                             | Round up to the next number                                                           |
| Run 23    | Decreased benthic cephalopods-squids diet link                           | pPREYCBP-CBE          | 0.0174                                                                        | 0.0002                                                                                |
| Run 24    | Decreased cannibalism value in the diet for squids                       | pPREYCBP-CBE          | 0.0567                                                                        | $5.67 \cdot 10^{-07}$                                                                 |
| Run 25    | Decreased deep-sea fishes recruits' structural and reserve weight        | KWSR_FSD,<br>KWRR_FSD | 66.9578, 177.4381                                                             | 60, 170                                                                               |
| Run 26    | Increased growth rate for deep-sea fishes                                | mum_FSD               | 0.1366 0.6832 1.3665<br>2.0497 2.733 3.4164<br>4.0995 4.7827 5.4659<br>6.1492 | 0.1366 3.4162 6.8324<br>10.2486 13.6648 17.0811<br>20.4973 23.9135 27.3297<br>30.7459 |
| Run 27    | Increased consumption rate for deep-sea fishes                           | C_FSD                 | 0.0137 0.0683 0.1366 0.205<br>0.2733 0.3416 0.4099<br>0.4783 0.5466 0.6149    | 0.0137 0.3416 0.6832 .0249<br>1.3665 1.7081 2.0497<br>2.3913 2.733 3.0746             |
| Run 28    | Increased recruitment for deep-sea fishes                                | BHalpha_FSD           | $6 \cdot 10^{05}$                                                             | $9 \cdot 10^{06}$                                                                     |
| Run 29    | Decreased mortality for juvenile deep-sea fishes                         | jmQ_FSD               | $6.301 \cdot 10^{-08}$                                                        | $6.301 \cdot 10^{-12}$                                                                |
| Run 30    | Decreased small demersal fishes recruits' structural and reserve weight  | KWSR_FDS,<br>KWRR_FDS | 82.8861, 219.6481                                                             | 65, 180                                                                               |
| Run 31    | Increased recruitment for small demersal fishes                          | BHalpha_FDS           | $1.5 \cdot 10^{07}$                                                           | $1.5 \cdot 10^{08}$                                                                   |
| Run 32    | Decreased mortality for adult small demersal fishes                      | mQ_FDS                | $1.178 \cdot 10^{-07}$                                                        | $1.178 \cdot 10^{-11}$                                                                |
| Run 33    | Increased medium demersal fishes recruits' structural and reserve weight | KWSR_FDM,<br>KWRR_FDM | 54.4312, 144.2426                                                             | 250, 840                                                                              |
| Run 34    | Increased recruitment for medium demersal fishes                         | BHalpha_FDM           | $4 \cdot 10^{06}$                                                             | $1.3 \cdot 10^{08}$                                                                   |
| Run 35    | Decreased mortality for adult medium demersal fishes                     | mQ_FDM                | $3.288 \cdot 10^{-08}$                                                        | $3.288 \cdot 10^{-10}$                                                                |
| Run 36    | Decreased large demersal fishes recruits' structural and reserve weight  | KWSR_FDL,<br>KWRR_FDL | 3106.7989, 8233.0172                                                          | 145, 500                                                                              |

Table S8 (continued)

| Sim. name | Description                                              | Parameter pert.       | Original value                                                                               | Final value                                                                                       |
|-----------|----------------------------------------------------------|-----------------------|----------------------------------------------------------------------------------------------|---------------------------------------------------------------------------------------------------|
| Run 37    | Increased growth rate for large demersal fishes          | mum_FDL               | 0.2449 6.7274 7.9521<br>22.4733 44.6387<br>77.5593 116.9185<br>143.3275 149.0861<br>155.0053 | 0.2449 33.6371 39.7603<br>112.3663 223.1934<br>387.7967 584.5923<br>716.6375 745.4305<br>775.0265 |
| Run 38    | Increased consumption rate for large demersal fishes     | C_FDL                 | 0.0245 0.6727 0.7952<br>2.2473 4.4639 7.7559<br>11.6918 14.3328 14.9086<br>15.5005           | 0.0245 3.3637 3.976<br>11.2366 22.3193 38.7797<br>58.4592 71.6638 74.5431<br>77.5026              |
| Run 39    | Decreased recruitment for large demersal fishes          | BHalpha_FDL           | 2.5 · 10 <sup>08</sup>                                                                       | 9 · 10 <sup>05</sup>                                                                              |
| Run 40    | Decreased mortality for adult large demersal fishes      | mQ_FDL                | 5.479 · 10 <sup>-08</sup>                                                                    | 5.479 · 10 <sup>-10</sup>                                                                         |
| Run 41    | Increased recruitment for mullets                        | BHalpha_MUL           | 9 · 10 <sup>05</sup>                                                                         | 9 · 10 <sup>10</sup>                                                                              |
| Run 42    | Decreased mortality for mullets                          | jmQ_MUL,<br>mQ_MUL    | 2.863 · 10 <sup>-07</sup> ,<br>1.087 · 10 <sup>-07</sup>                                     | 2.863 · 10 <sup>-09</sup> ,<br>1.087 · 10 <sup>-10</sup>                                          |
| Run 43    | Increased recruitment for flatfishes                     | BHalpha_FFL           | 1.4 · 10 <sup>05</sup>                                                                       | 4.59 · 10 <sup>08</sup>                                                                           |
| Run 44    | Decreased mortality for adult flatfishes                 | mQ_FFL                | 5.479 · 10 <sup>-08</sup>                                                                    | 5.479 · 10 <sup>-12</sup>                                                                         |
| Run 45    | Increased recruitment for common sole                    | BHalpha_SOL           | 1.9 · 10 <sup>06</sup>                                                                       | 8 · 10 <sup>07</sup>                                                                              |
| Run 46    | Decreased mortality for adult common sole                | mQ_SOL                | 2.74 · 10 <sup>-08</sup>                                                                     | 2.74 · 10 <sup>-12</sup>                                                                          |
| Run 47    | Decreased megrim recruits' structural and reserve weight | KWSR_MEG,<br>KWRR_MEG | 344.0352, 911.6933                                                                           | 20, 60                                                                                            |
| Run 48    | Increased growth rate for megrim                         | mum_MEG               | 0.026 0.5246 0.6545 1.6345<br>2.9323 4.7554 7.2144<br>9.8164 12.4184 15.0204                 | 0.026 2.6229 3.2727 8.1723<br>14.6614 23.7769 36.0722<br>49.0821 62.0921 75.102                   |
| Run 49    | Increased consumption rate for megrim                    | C_MEG                 | 0.0026 0.0525 0.0655<br>0.1634 0.2932 0.4755<br>0.7214 0.9816 1.2418<br>1.502                | 0.0026 0.2623 0.3273<br>0.8172 1.4661 2.3777<br>3.6072 4.9082 6.2092<br>7.5102                    |
| Run 50    | Decreased recruitment for megrim                         | BHalpha_MEG           | 7 · 10 <sup>07</sup>                                                                         | 9 · 10 <sup>06</sup>                                                                              |
| Run 51    | Decreased mortality for megrim                           | jmQ_MEG,<br>mQ_MEG    | 2.7395 · 10 <sup>-12</sup> ,<br>5.479 · 10 <sup>-08</sup>                                    | 2.7395 · 10 <sup>-13</sup> ,<br>5.479 · 10 <sup>-13</sup>                                         |
| Run 52    | Decreased cods recruits' structural and reserve weight   | KWSR_COD,<br>KWRR_COD | 25.4303, 67.3902                                                                             | 10, 30                                                                                            |
| Run 53    | Increased growth rate for cods                           | mum_COD               | 0.0315 0.1574 0.3148<br>0.4721 0.8339 1.1956                                                 | 0.0315 1.1017 2.2033<br>3.305 5.837 8.369                                                         |
| Run 54    | Increased consumption rate for cods                      | C_COD                 | 0.0031 0.0157 0.0315<br>0.0472 0.0834 0.1196                                                 | 0.0031 0.1102 0.2203<br>0.3305 0.5837 0.8369                                                      |
| Run 55    | Increased recruitment for cods                           | BHalpha_COD           | 4 · 10 <sup>06</sup>                                                                         | 7 · 10 <sup>09</sup>                                                                              |

Table S8 (continued)

| Sim. name | Description                                                                        | Parameter pert.       | Original value                                                                      | Final value                                                                                                |
|-----------|------------------------------------------------------------------------------------|-----------------------|-------------------------------------------------------------------------------------|------------------------------------------------------------------------------------------------------------|
| Run 56    | Decreased mortality for cods                                                       | jmQ_COD,<br>mQ_COD    | $1.23 \cdot 10^{-10}$ ,<br>$5.21 \cdot 10^{-10}$                                    | $1.23 \cdot 10^{-11}$ ,<br>$5.21 \cdot 10^{-14}$                                                           |
| Run 57    | Decreased hake recruits' structural and reserve weight                             | KWSR_HKE,<br>KWRR_HKE | 1048.4444, 2778.3775                                                                | 55, 150                                                                                                    |
| Run 58    | Increased growth rate for hake                                                     | mum_HKE               | 0.0585 0.5946 0.8871<br>2.0864 4.4095 8.2891<br>14.2249 20.8421<br>33.781 51.8354   | 5.8495 59.4645 88.7118<br>20.8636 44.0947 82.8911<br>142.2488 208.4211<br>337.8097 518.3536                |
| Run 59    | Increased consumption rate for hake                                                | C_HKE                 | 0.0058 0.0595<br>0.0887 0.2086<br>0.4409 0.8289<br>1.4225 2.0842<br>3.3781 5.1835   | 58.4945 5946.4511<br>8871.1771 208.6357<br>440.9473 828.9111<br>1422.4875 2084.2113<br>3378.0965 5183.5364 |
| Run 60    | Decreased recruitment for hake                                                     | BHalpha_HKE           | $3.5 \cdot 10^{07}$                                                                 | $1 \cdot 10^{07}$                                                                                          |
| Run 61    | Decreased mortality for hake                                                       | jmQ_HKE,<br>mQ_HKE    | $5.48 \cdot 10^{-12}$ ,<br>$1.096 \cdot 10^{-07}$                                   | $5.48 \cdot 10^{-09}$ ,<br>$1.096 \cdot 10^{-11}$                                                          |
| Run 62    | Increased upper gape size for hake                                                 | KUP_HKE               | 0.4                                                                                 | 0.8                                                                                                        |
| Run 63    | Decreased blue whiting recruits' structural and reserve weight                     | KWSR_WHB,<br>KWRR_WHB | 51.2596, 135.838                                                                    | 10, 50                                                                                                     |
| Run 64    | Increased growth rate for blue whiting                                             | mum_WHB               | 0.0459 0.2297 0.4595<br>0.6892 1.3296 1.97 2.6104<br>3.2508 3.8912 4.5315           | 0.0919 0.4595 0.919<br>1.3785 2.6593 3.94 5.2208<br>6.5015 7.7823 9.0631                                   |
| Run 65    | Increased consumption rate for blue whiting                                        | C_WHB                 | 0.0046 0.023 0.0459<br>0.0689 0.133 0.197 0.261<br>0.3251 0.3891 0.4532             | 0.0092 0.0459 0.0919<br>0.1378 0.2659 0.394 0.5221<br>0.6502 0.7782 0.9063                                 |
| Run 66    | Increased recruitment for blue whiting                                             | BHalpha_WHB           | $4 \cdot 10^{08}$                                                                   | $1 \cdot 10^{09}$                                                                                          |
| Run 67    | Decreased seabass recruits' structural and reserve weight                          | KWSR_BSS,<br>KWRR_BSS | 1211.0045, 3209.1618                                                                | 600, 1000                                                                                                  |
| Run 68    | Increased growth rate for seabass                                                  | mum_BSS               | 0.4727 2.3634 4.7268<br>9.2408 13.7549 18.269<br>22.7831 27.2972 31.8113<br>36.3254 | 0.4727 4.7268 9.4535<br>18.4817 27.5099 36.5381<br>45.5662 54.5944 63.6226<br>72.6508                      |
| Run 69    | Increased consumption rate for seabass                                             | C_BSS                 | 0.0473 0.2363 0.4727<br>0.9241 1.3755 1.8269<br>2.2783 2.7297<br>3.1811 3.6325      | 4.7268 47.2676 94.5351<br>184.817 275.0988 365.3806<br>455.6625 545.9443<br>636.2261 726.508               |
| Run 70    | Decreased recruitment for seabass                                                  | BHalpha_BSS           | $3.9 \cdot 10^{07}$                                                                 | $1 \cdot 10^{06}$                                                                                          |
| Run 71    | Increased mortality for juvenile seabass and decreased mortality for adult seabass | jmQ_BSS,<br>mQ_BSS    | $6.575 \cdot 10^{-12}$ ,<br>$6.575 \cdot 10^{-08}$                                  | $6.575 \cdot 10^{-10}$ ,<br>$6.575 \cdot 10^{-11}$                                                         |

Table S8 (continued)

| Sim. name | Description                                                                              | Parameter pert.                                         | Original value                                                                       | Final value                                                                                           |
|-----------|------------------------------------------------------------------------------------------|---------------------------------------------------------|--------------------------------------------------------------------------------------|-------------------------------------------------------------------------------------------------------|
| Run 72    | Increased diet for seabass                                                               | pPREY1BSS1,<br>pPREY2BSS1,<br>pPREY1BSS2,<br>pPREY2BSS2 | -                                                                                    | Original value * 2                                                                                    |
| Run 73    | Decreased anglerfish recruits' structural and reserve weight                             | KWSR_ANF,<br>KWRR_ANF                                   | 2424.2946, 6424.3808                                                                 | 100, 200                                                                                              |
| Run 74    | Increased growth rate for anglerfish                                                     | mum_ANF                                                 | 0.1113 0.9738 1.5305<br>6.1945 13.6485 26.4513<br>34.9919 47.0186 81.9164<br>97.2021 | 0.05 29.7381 35.3052<br>81.9448 156.4855 284.5126<br>369.919 490.1862 839.1639<br>992.0211            |
| Run 75    | Increased consumption rate for anglerfish                                                | C_ANF                                                   | 0.0111 0.0974 0.1531<br>0.6194 1.3649<br>2.6451 3.4992<br>4.7019 8.1916<br>9.7202    | 0.5 297.3813 353.0518<br>819.4481 1564.8548<br>2845.1262 3699.1905<br>4901.862 8391.6391<br>9920.2109 |
| Run 76    | Decreased recruitment for anglerfish                                                     | BHalpha_ANF                                             | $9 \cdot 10^{07}$                                                                    | $1 \cdot 10^{07}$                                                                                     |
| Run 77    | Increased mortality for juvenile anglerfish and decreased mortality for adult anglerfish | jmQ_ANF,<br>mQ_ANF                                      | $3.4245 \cdot 10^{-09}$ ,<br>$6.849 \cdot 10^{-08}$                                  | $3.082 \cdot 10^{-08}$ ,<br>$6.164 \cdot 10^{-09}$                                                    |
| Run 78    | Increased recruitment for mesopelagic fishes                                             | BHalpha_FMP                                             | $7 \cdot 10^{06}$                                                                    | $7 \cdot 10^{09}$                                                                                     |
| Run 79    | Decreased other planktivorous recruits' structural and reserve weight                    | KWSR_OPL,<br>KWRR_OPL                                   | 13.7987, 36.5666                                                                     | 6.5, 10                                                                                               |
| Run 80    | Increased recruitment for other planktivorous                                            | BHalpha_OPL                                             | $1.2 \cdot 10^{07}$                                                                  | $1.2 \cdot 10^{09}$                                                                                   |
| Run 81    | Decreased mortality for adult other planktivorous                                        | mQ_OPL                                                  | $4.384 \cdot 10^{-08}$                                                               | $4.384 \cdot 10^{-12}$                                                                                |
| Run 82    | Increased growth rate for anchovy                                                        | mum_ANE                                                 | 0.0666 0.1728 0.5059                                                                 | 0.1332 0.3456 1.0118                                                                                  |
| Run 83    | Increased consumption rate for anchovy                                                   | C_ANE                                                   | 0.0067 0.0173 0.0506                                                                 | 0.0133 0.0346 0.1012                                                                                  |
| Run 84    | Increased recruitment for anchovy                                                        | BHalpha_ANE                                             | $2.5 \cdot 10^{07}$                                                                  | $2.5 \cdot 10^{10}$                                                                                   |
| Run 85    | Decreased mortality for adult anchovy                                                    | mQ_ANE                                                  | $3.288 \cdot 10^{-07}$                                                               | $3.288 \cdot 10^{-13}$                                                                                |
| Run 86    | Increased recruitment for sardine                                                        | BHalpha_PIL                                             | $1 \cdot 10^{07}$                                                                    | $1 \cdot 10^{09}$                                                                                     |
| Run 87    | Decreased mortality for sardine                                                          | jmQ_PIL,<br>mQ_PIL                                      | $2.178 \cdot 10^{-11}$ ,<br>$1.038 \cdot 10^{-07}$                                   | $2.297 \cdot 10^{-15}$ ,<br>$1.142 \cdot 10^{-12}$                                                    |
| Run 88    | Decreased adult hake-sardine diet links                                                  | pPREYPIL1HKE2,<br>pPREYPIL2HKE2                         | -                                                                                    | Original value * 0.01                                                                                 |
| Run 89    | Decreased horse mackerel recruits' structural and reserve weight                         | KWSR_HOM,<br>KWRR_HOM                                   | 121.9419, 323.1461                                                                   | 80, 150                                                                                               |
| Run 90    | Increased recruitment for horse mackerel                                                 | BHalpha_HOM                                             | $9 \cdot 10^{07}$                                                                    | $9 \cdot 10^{08}$                                                                                     |
| Run 91    | Decreased mortality for adult horse mackerel                                             | mQ_HOM                                                  | $4.11 \cdot 10^{-08}$                                                                | $4.11 \cdot 10^{-12}$                                                                                 |



Table S8 (continued)

| Sim. name | Description                                                                  | Parameter pert.                                                                                                                             | Original value                                                                                | Final value                                                                                             |
|-----------|------------------------------------------------------------------------------|---------------------------------------------------------------------------------------------------------------------------------------------|-----------------------------------------------------------------------------------------------|---------------------------------------------------------------------------------------------------------|
| Run 92    | Decreased anglerfish-horse mackerel and hake-horse mackerel diet links       | pPREYHOM1ANF1,<br>pPREYHOM2ANF1,<br>pPREYHOM1ANF2,<br>pPREYHOM2ANF2,<br>pPREYHOM1HKE1,<br>pPREYHOM2HKE1,<br>pPREYHOM1HKE2,<br>pPREYHOM2HKE2 | -                                                                                             | Original value * 0.01                                                                                   |
| Run 93    | Increased mackerel recruits' structural and reserve weight                   | KWSR_MAC,<br>KWRR_MAC                                                                                                                       | 192.4778, 510.0661                                                                            | 270, 725                                                                                                |
| Run 94    | Increased growth rate for mackerel                                           | mum_MAC                                                                                                                                     | 0.31 1.5484 3.0982<br>3.9794 4.5582 5.0038<br>5.7638 6.6235 7.7265<br>8.8295                  | 0.9299 4.6453 6.1964<br>7.9588 9.1164 10.0076<br>11.5277 13.247 15.453<br>17.659                        |
| Run 95    | Increased consumption rate for mackerel                                      | C_MAC                                                                                                                                       | 0.031 0.1548 0.3098 0.3979<br>0.4558 0.5004 0.5764<br>0.6624 0.7727 0.883                     | 0.093 0.4645 0.6196 0.7959<br>0.9116 1.0008 1.1528<br>1.3247 1.5453 1.7659                              |
| Run 96    | Increased recruitment for mackerel                                           | BHalpha_MAC                                                                                                                                 | $6 \cdot 10^{07}$                                                                             | $1.5 \cdot 10^{09}$                                                                                     |
| Run 97    | Decreased mortality for mackerel                                             | jmQ_MAC,<br>mQ_MAC                                                                                                                          | $2.055 \cdot 10^{-12}$ ,<br>$4.11 \cdot 10^{-10}$                                             | $2.055 \cdot 10^{-20}$ ,<br>$4.11 \cdot 10^{-40}$                                                       |
| Run 98    | Decreased diet links on adult mackerel prey                                  | pPREY2MACXXX1,<br>pPREY2MACXXX2                                                                                                             | -                                                                                             | Original value * 0.001                                                                                  |
| Run 99    | Decreased other large pelagic fishes recruits' structural and reserve weight | KWSR_OPE,<br>KWRR_OPE                                                                                                                       | 929.3929, 2462.8911                                                                           | 700, 1800                                                                                               |
| Run 100   | Increased growth rate for adult other large pelagic fishes                   | mum_OPE                                                                                                                                     | 1.5957 7.9786 15.9573<br>26.66 37.3627                                                        | 1.5957 55.8504 111.7008<br>186.6198 261.5387                                                            |
| Run 101   | Increased consumption rate for adult other large pelagic fishes              | C_OPE                                                                                                                                       | 0.1596 0.7979 1.5957<br>2.666 3.7363                                                          | 0.1596 5.585 11.1701<br>18.662 26.1539                                                                  |
| Run 102   | Decreased recruitment for other large pelagic fishes                         | BHalpha_OPE                                                                                                                                 | $2 \cdot 10^{07}$                                                                             | $7 \cdot 10^{06}$                                                                                       |
| Run 103   | Decreased mortality for adult other large pelagic fishes                     | mQ_OPE                                                                                                                                      | $2.384 \cdot 10^{-07}$                                                                        | $2.384 \cdot 10^{-11}$                                                                                  |
| Run 104   | Decreased albacore recruits' structural and reserve weight                   | KWSR_ALB,<br>KWRR_ALB                                                                                                                       | 7221.3482, 19136.5728                                                                         | 400, 800                                                                                                |
| Run 105   | Increased growth rate for albacore                                           | mum_ALB                                                                                                                                     | 0.997 68.8329 73.8181<br>142.651 211.4838<br>280.3167 349.1495<br>458.607 568.0645<br>677.522 | 1.9941 137.6657 369.0905<br>713.2548 1057.4191<br>1401.5834 1745.7477<br>2293.0352 2840.3226<br>3387.61 |

Table S8 (continued)

| Sim. name | Description                                                         | Parameter pert.       | Original value                                                                                 | Final value                                                                                                |
|-----------|---------------------------------------------------------------------|-----------------------|------------------------------------------------------------------------------------------------|------------------------------------------------------------------------------------------------------------|
| Run 106   | Increased consumption rate for albacore                             | C_ALB                 | 0.0997 6.8833 7.3818<br>14.2651 21.1484 28.0317<br>34.915 45.8607<br>56.8065 67.7522           | 0.1994 13.7666 36.9091<br>71.3255 105.7419 140.1583<br>174.5748 229.3035<br>284.0323 338.761               |
| Run 107   | Decreased recruitment for albacore                                  | BHalpha_ALB           | $3.5 \cdot 10^{09}$                                                                            | $5 \cdot 10^{08}$                                                                                          |
| Run 108   | Decreased mortality for juvenile albacore                           | jmQ_ALB               | $8.219 \cdot 10^{-08}$                                                                         | $8.219 \cdot 10^{-10}$                                                                                     |
| Run 109   | Increased bluefin tuna recruits' structural and reserve weight      | KWSR_BFT,<br>KWRR_BFT | 67.2025, 178.0868                                                                              | 6000, 8500                                                                                                 |
| Run 110   | Increased growth rate for age classes 3 to 10 for bluefin tuna      | mum_BFT               | 0.0095 0.0477 0.0954<br>0.3497 0.7312 1.1444<br>1.5895 2.0981 2.5749<br>2.9882                 | 0.0095 0.0477 0.9537<br>3.4968 7.3116 11.4442<br>15.8947 20.9809 25.7493<br>29.8819                        |
| Run 111   | Increased consumption rate for age classes 3 to 10 for bluefin tuna | C_BFT                 | 0.001 0.0048 0.0095 0.035<br>0.0731 0.1144 0.1589<br>0.2098 0.2575 0.2988                      | 0.001 0.0048 0.0954 0.3497<br>0.7312 1.1444 1.5895<br>2.0981 2.5749 2.9882                                 |
| Run 112   | Increased recruitment for bluefin tuna                              | BHalpha_BFT           | $9 \cdot 10^{05}$                                                                              | $9 \cdot 10^{08}$                                                                                          |
| Run 113   | Decreased skates and rays recruits' structural and reserve weight   | KWSR_SSK,<br>KWRR_SSK | 1102.1053, 2920.5791                                                                           | 100, 200                                                                                                   |
| Run 114   | Decreased recruitment for skates and rays                           | KDENR_SSK             | 1.5                                                                                            | 0.2                                                                                                        |
| Run 115   | Decreased deep water sharks recruits' structural and reserve weight | KWSR_SHD,<br>KWRR_SHD | 116.3332, 308.2829                                                                             | 110, 280                                                                                                   |
| Run 116   | Increased growth rate for deep water sharks                         | mum_SHD               | 0.0753 0.3765 0.7531<br>1.1296 1.5062 1.914<br>2.3218 2.7296 3.1374<br>3.5453                  | 0.7531 3.7655 7.5309<br>11.2964 15.0619 19.14<br>3.2182 27.2963 31.3745<br>35.4527                         |
| Run 117   | Increased consumption rate for deep water sharks                    | C_SHD                 | 0.0075 0.0377 0.0753<br>0.113 0.1506 0.1914 0.2322<br>0.273 0.3137 0.3545                      | 0.0753 0.3765 0.7531<br>1.1296 1.5062 1.914 2.3218<br>2.7296 3.1374 3.5453                                 |
| Run 118   | Decreased pelagic sharks recruits' structural and reserve weight    | KWSR_SHP,<br>KWRR_SHP | 40315.9198, 106837.1875                                                                        | 14000, 37000                                                                                               |
| Run 119   | Increased growth rate for age classes 2 to 10 for pelagic sharks    | mum_SHP               | 14.3784 228.2669<br>300.159 621.7315<br>958.179 1262.83<br>1517.975 1719.84<br>1875.41 2030.98 | 14.3784 1141.3344<br>1500.795 3108.6576<br>4790.8952 6314.1485<br>7589.8727 8599.2013<br>9377.0495 10154.9 |

Table S8 (continued)

| Sim. name | Description                                                                | Parameter pert.       | Original value                                                                                                         | Final value                                                                                                                      |
|-----------|----------------------------------------------------------------------------|-----------------------|------------------------------------------------------------------------------------------------------------------------|----------------------------------------------------------------------------------------------------------------------------------|
| Run 120   | Increased consumption rate for pelagic sharks                              | C_SHP                 | 1.4378 22.8267<br>30.0159 62.1732<br>95.8179 126.283<br>151.7975<br>171.984 187.541<br>203.098                         | 143.7843 11413.3436<br>15007.9501 31086.5756<br>47908.9516 63141.4853<br>75898.7269<br>85992.0131 93770.4947<br>101548.9764      |
| Run 121   | Decreased recruitment for pelagic sharks                                   | KDENR_SHP             | 1.5                                                                                                                    | 0.05                                                                                                                             |
| Run 122   | Increased mortality for pelagic sharks                                     | jmQ_SHP,<br>mQ_SHP    | 2.7395·10 <sup>-12</sup> ,<br>5.479·10 <sup>-08</sup>                                                                  | 2.7395·10 <sup>-10</sup> ,<br>5.479·10 <sup>-07</sup>                                                                            |
| Run 123   | Increased growth rate for adult toothed cetaceans                          | mum_CET               | 48.8665 192.8439<br>437.1762 630.0201<br>822.8639 1015.708<br>1208.552 1401.396<br>1594.239 1787.083                   | 48.8665 1928.4388<br>4371.7617 6300.2005<br>8228.6393 10157.0782<br>12085.517 14013.9558<br>15942.3946 17870.8334                |
| Run 124   | Increased consumption rate for toothed cetaceans                           | C_CET                 | 4.8866 19.2844<br>43.7176 63.002<br>82.2864 101.5708<br>120.8552 140.1396<br>159.4239 178.7083                         | 488.6646 19284.3881<br>43717.6173 63002.0054<br>82286.3935 101570.7816<br>120855.1697 140139.5578<br>159423.9459 178708.334      |
| Run 125   | Decreased recruitment for toothed cetaceans                                | KDENR_CET             | 0.05                                                                                                                   | 0.04                                                                                                                             |
| Run 126   | Increased mortality for toothed cetaceans                                  | jmQ_CET, mQ_CET       | 2.7395·10 <sup>-12</sup> ,<br>5.479·10 <sup>-08</sup>                                                                  | 2.7395·10 <sup>-10</sup> ,<br>5.479·10 <sup>-06</sup>                                                                            |
| Run 127   | Increased growth rate for baleen whales                                    | mum_BWH               | 8484.8728 7154.1741<br>49578.5379 56732.712<br>63886.8862 71041.0603<br>78195.2344 85349.4085<br>92503.5827 99657.7568 | 59394.1093 50079.2188<br>347049.7655 397128.9843<br>447208.2032 497287.422<br>547366.6409 597445.8597<br>647525.0786 697604.2974 |
| Run 128   | Increased consumption rate for baleen whales                               | C_BWH                 | 848.4873 715.4174<br>4957.8538 5673.2712<br>6388.68862 7104.106<br>7819.5234 8534.9409<br>9250.3583 9965.7757          | 5939.4109 5007.9219<br>34704.9765 39712.8984<br>44720.8203 49728.7422<br>54736.6641 59744.586<br>64752.5079 69760.4297           |
| Run 129   | Decreased recruitment for baleen whales                                    | KDENR_BWH             | 0.3                                                                                                                    | 0.03                                                                                                                             |
| Run 130   | Increased mortality for baleen whales                                      | jmQ_BWH,<br>mQ_BWH    | 3.04·10 <sup>-06</sup> ,<br>5.1·10 <sup>-08</sup>                                                                      | 3.04·10 <sup>-05</sup> ,<br>5.1·10 <sup>-06</sup>                                                                                |
| Run 131   | Decreased surface feeding seabirds recruits' structural and reserve weight | KWWR_SBS,<br>KWRR_SBS | 788.546, 2089.647                                                                                                      | 150, 450                                                                                                                         |

1575

Table S8 (continued)

| Sim. name | Description                                                                          | Parameter pert.       | Original value                                                                   | Final value                                                                                    |
|-----------|--------------------------------------------------------------------------------------|-----------------------|----------------------------------------------------------------------------------|------------------------------------------------------------------------------------------------|
| Run 132   | Increased growth rate for adult surface feeding seabirds                             | mum_SBS               | 0.1906 4.714 5.6669<br>10.3809 15.0949 19.8089<br>24.523 29.237 33.951<br>38.665 | 0.1906 9.428 11.3338<br>20.7618 30.1899 39.6179<br>49.0459 58.4739 67.9019<br>77.33            |
| Run 133   | Increased consumption rate for adult surface feeding seabirds                        | C_SBS                 | 0.0191 0.4714 0.5667<br>1.0381 1.5095<br>1.9809 2.4523 2.9237<br>3.3951 3.8665   | 0.0191 94.2802 113.3381<br>207.6184 301.8986<br>396.1788 490.459 584.7392<br>679.0195 773.2997 |
| Run 134   | Increased recruitment for Surface feeding seabirds                                   | KDENR_SBS             | 0.3                                                                              | 0.7                                                                                            |
| Run 135   | Decreased diving and pursuit divers seabirds recruits' structural and reserve weight | KWSR_SBD,<br>KWRR_SBD | 283.4522, 751.1482                                                               | 100, 400                                                                                       |
| Run 136   | Increased growth rate for diving and pursuit divers seabirds                         | mum_SBD               | 0.1802 1.5688 2.47 4.0388<br>5.6076 7.1764 8.7452<br>10.314 11.8828 13.4516      | 1.8025 15.688 24.7003<br>40.3883 56.0763 71.7643<br>87.4523 103.1403 118.8283<br>134.5163      |
| Run 137   | Increased consumption rate for diving and pursuit divers seabirds                    | C_SBD                 | 0.018 0.1569 0.247 0.4039<br>0.5608 0.7176 0.8745<br>1.0314 1.1883 1.3452        | 0.1802 1.5688 2.47 4.0388<br>5.6076 7.1764 8.7452<br>10.314 11.8828 13.4516                    |
| Run 138   | Increased recruitment for diving and pursuit divers seabirds                         | KDENR_SBD             | 0.3                                                                              | 1                                                                                              |
| Run 139   | Increased mortality for diving and pursuit divers seabirds                           | jmQ_SBD,<br>mQ_SBD    | $5.37 \cdot 10^{-09}$ ,<br>$2.74 \cdot 10^{-11}$                                 | $5.37 \cdot 10^{-07}$ ,<br>$2.74 \cdot 10^{-07}$                                               |

1580

1585

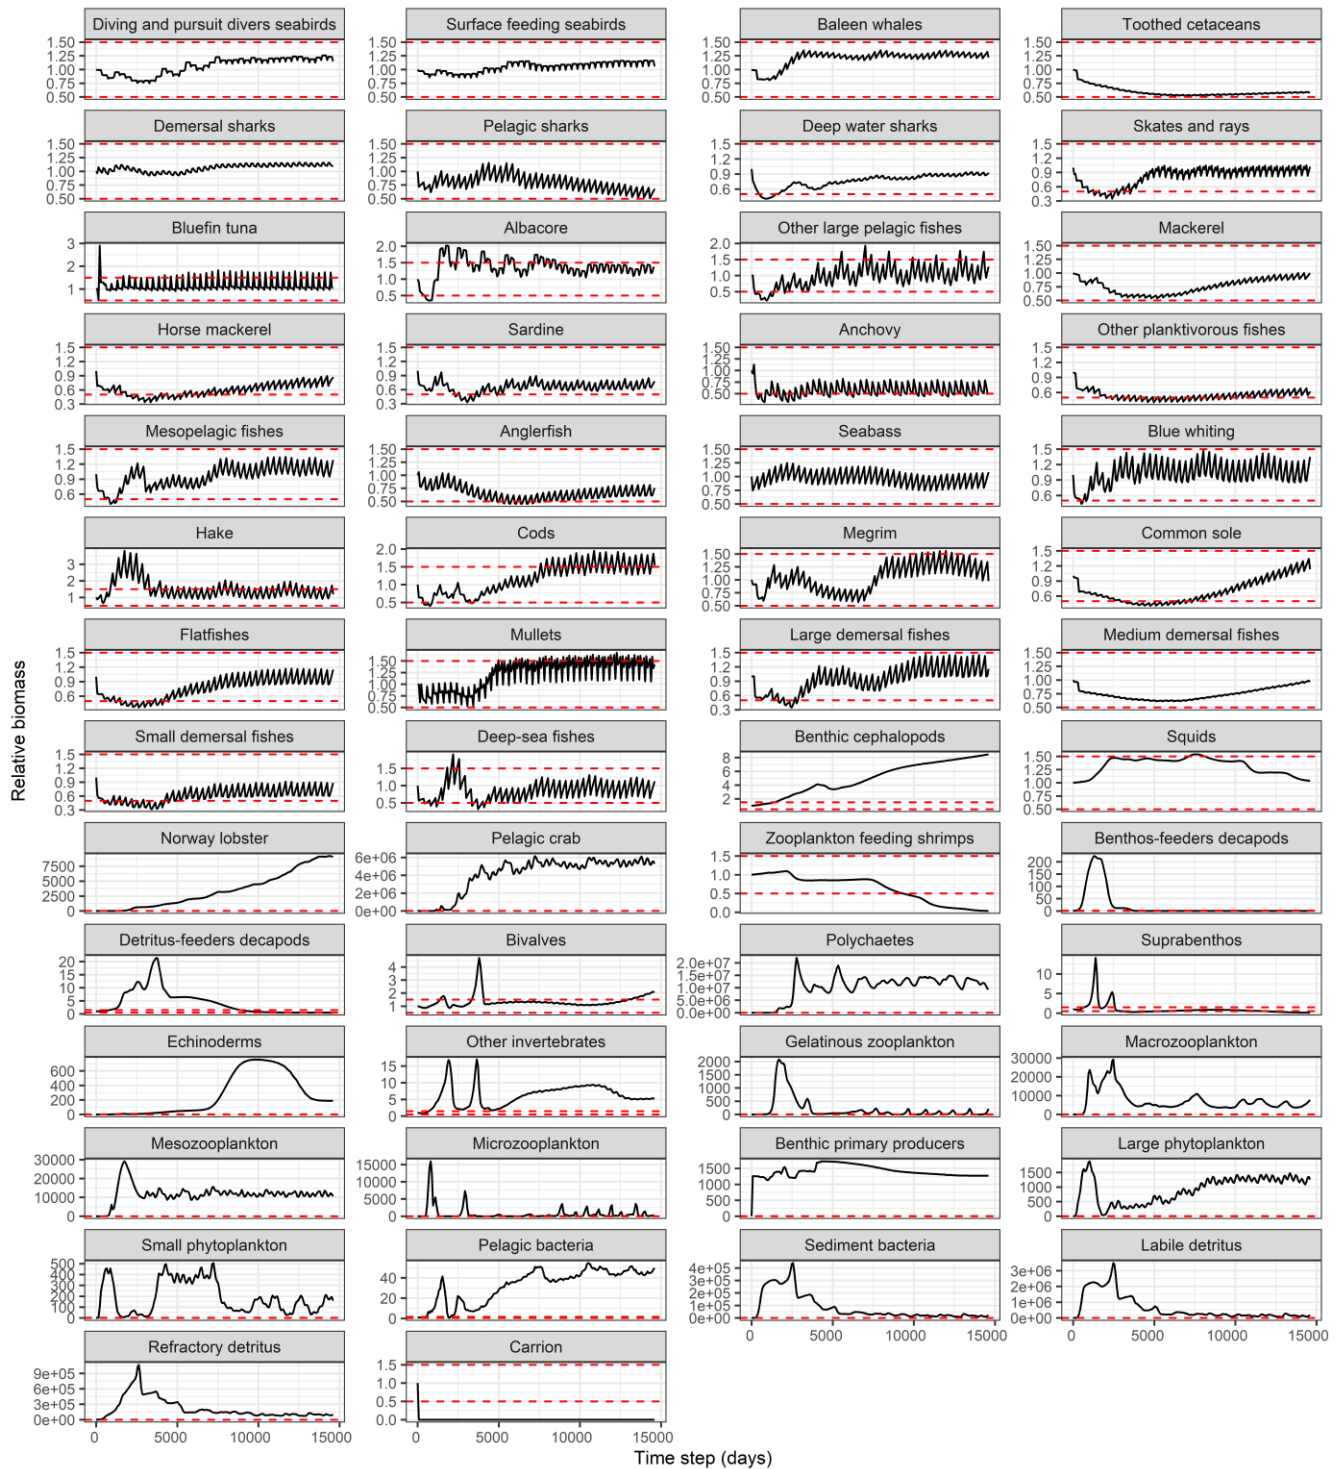

**Figure S2.** Time series of relative biomass of the functional groups across the entire model domain in the 40-year calibration. Dashed red line corresponds to the initial value  $\pm 50\%$  line.

Diving and pursuit divers seabirds

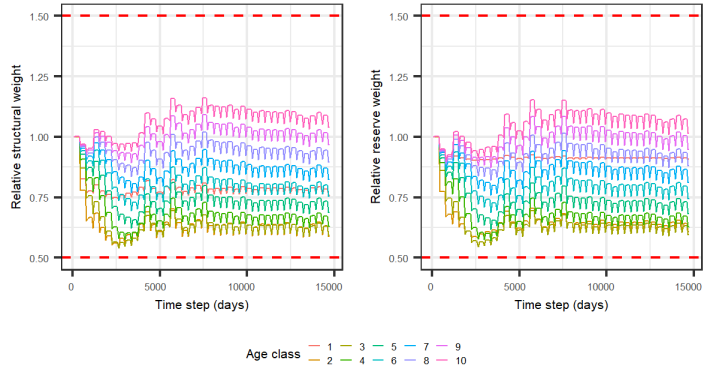

Surface feeding seabirds

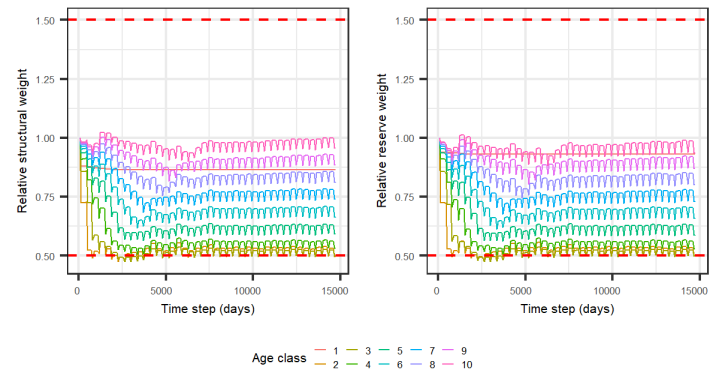

Baleen whales

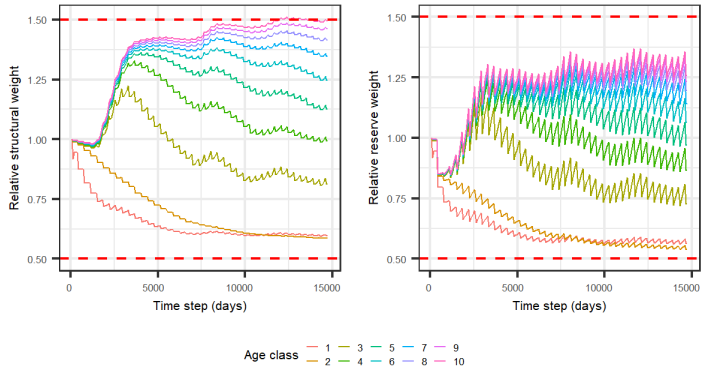

Toothed cetaceans

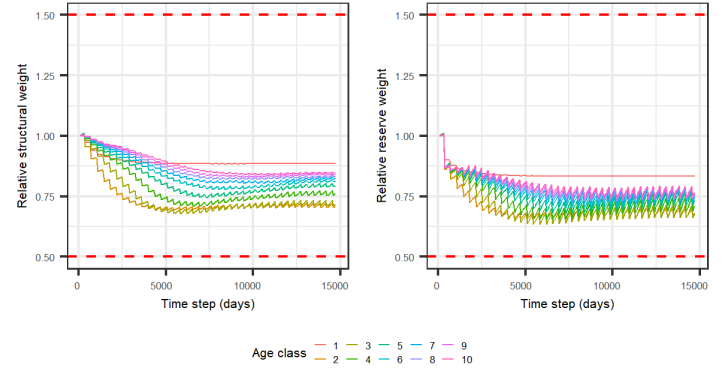

Demersal sharks

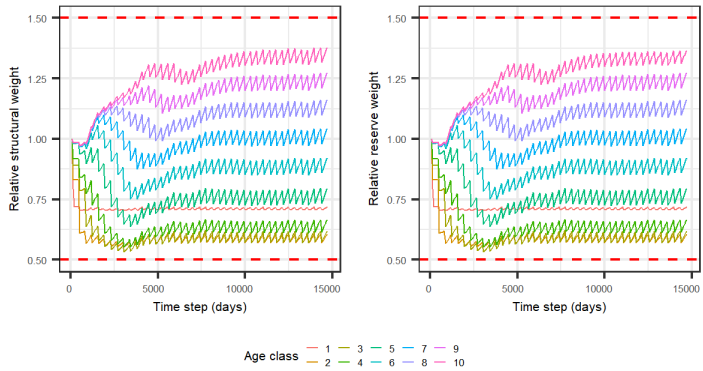

Pelagic sharks

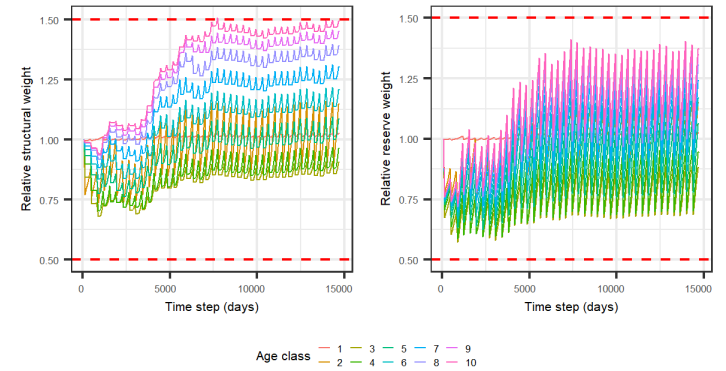

Deep water sharks

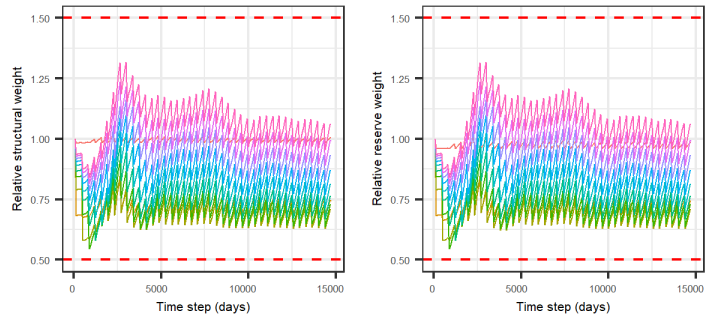

Age class 1 2 3 4 5 6 7 8 9 10

Skates and rays

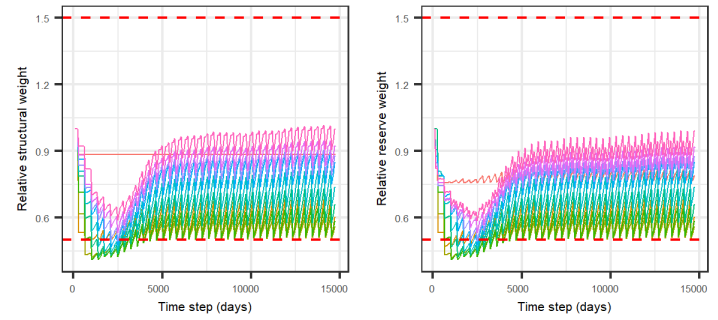

Age class 1 2 3 4 5 6 7 8 9 10

Bluefin tuna

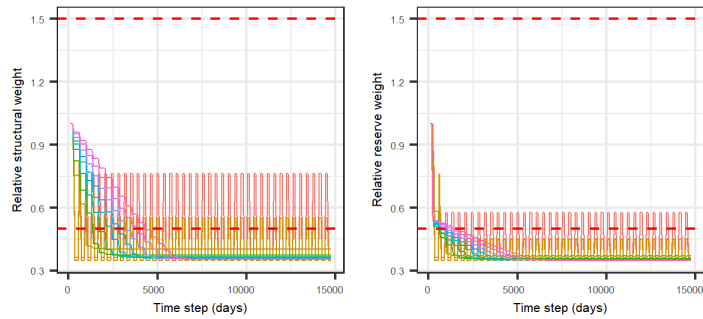

Age class 1 2 3 4 5 6 7 8 9 10

Albacore

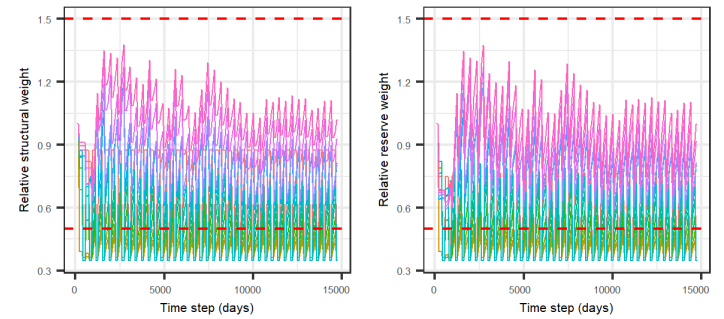

Age class 1 2 3 4 5 6 7 8 9 10

Other large pelagic fishes

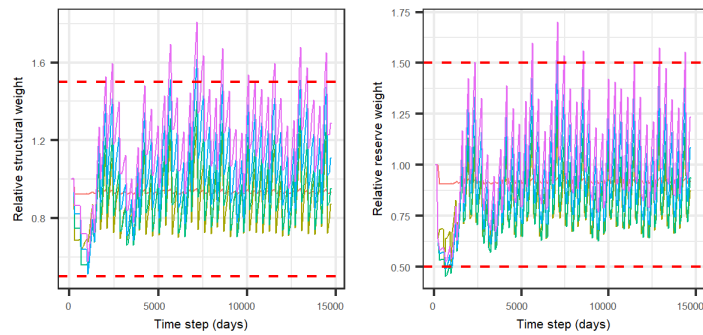

Age class 1 2 3 4 5

Mackerel

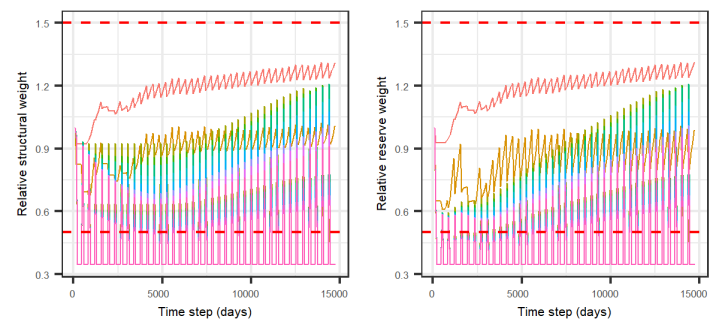

Age class 1 2 3 4 5 6 7 8 9 10

Horse mackerel

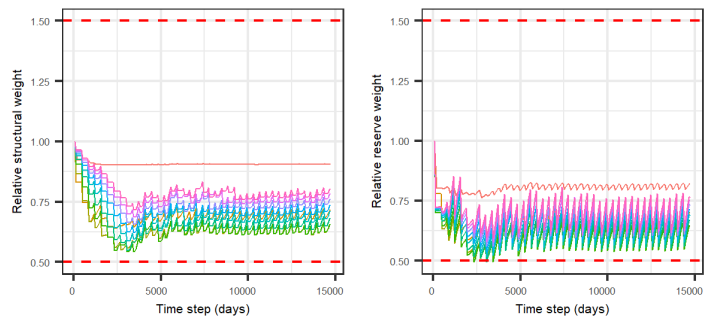

Age class 1 2 3 4 5 6 7 8 9 10

Sardine

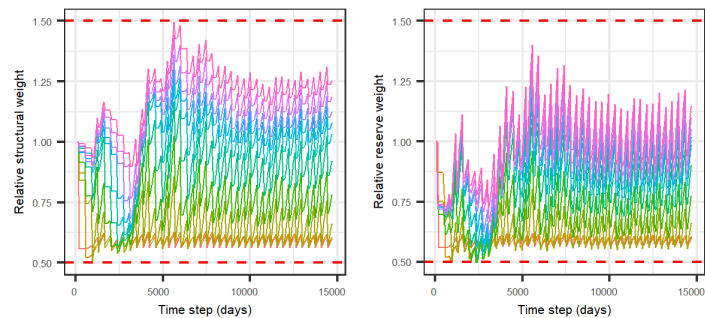

Age class 1 2 3 4 5 6 7 8 9 10

Anchovy

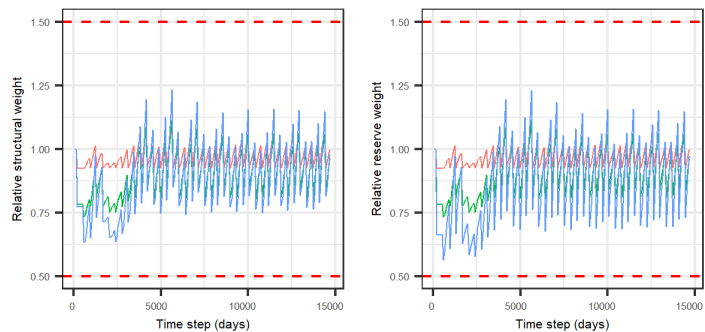

Age class 1 2 3

Other planktivorous fishes

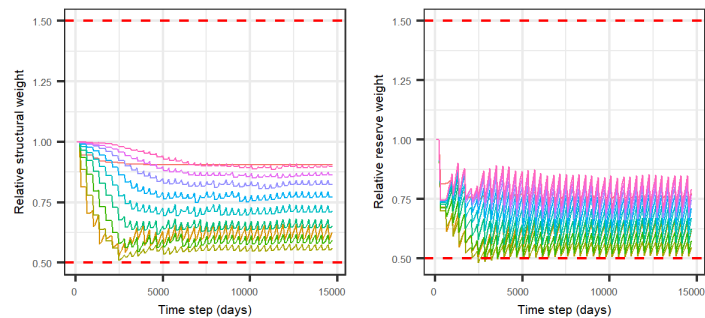

Age class 1 2 3 4 5 6 7 8 9 10

Mesopelagic fishes

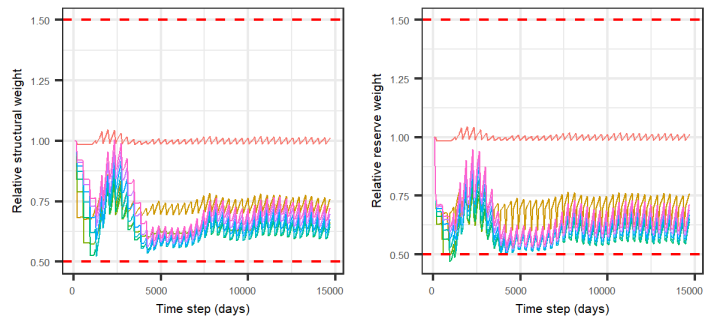

Age class 1 2 3 4 5 6 7 8

Anglerfish

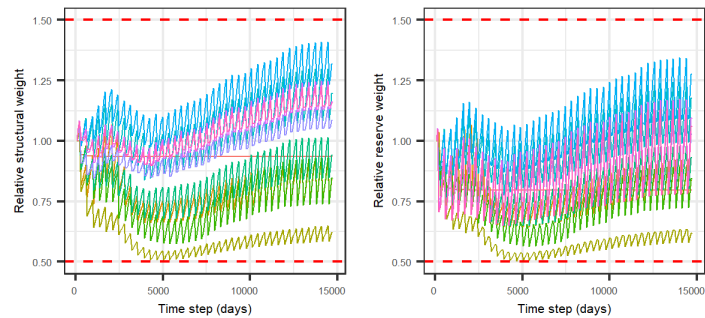

Age class 1 2 3 4 5 6 7 8 9 10



Seabass

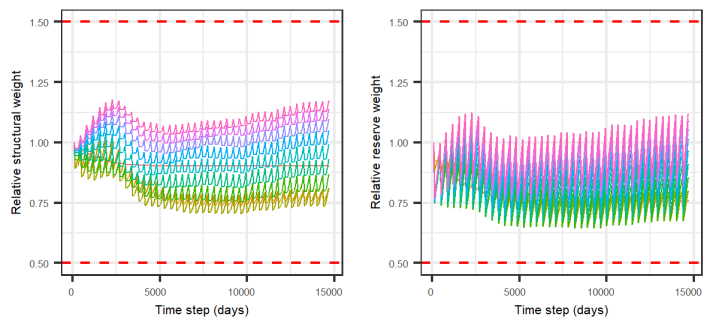

Age class 1 2 3 4 5 6 7 8 9 10

Blue whiting

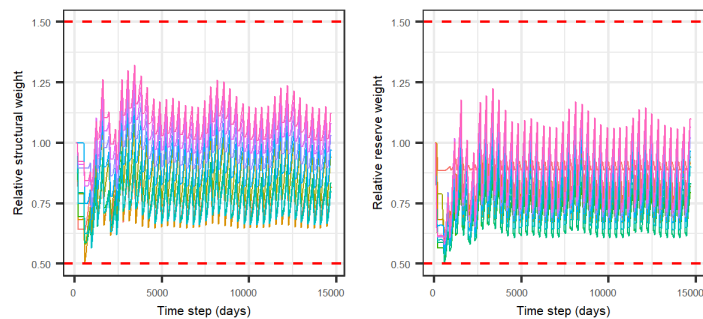

Age class 1 2 3 4 5 6 7 8 9 10

Hake

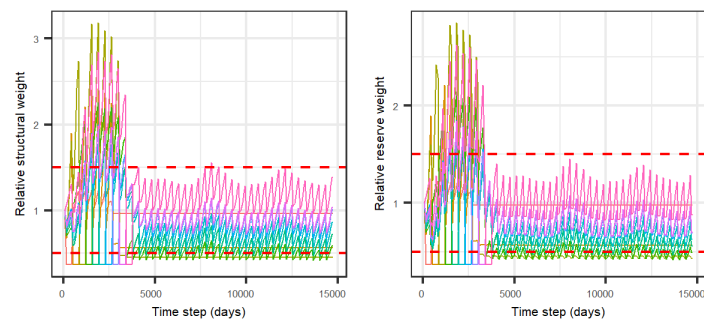

Age class 1 2 3 4 5 6 7 8 9 10

Cods

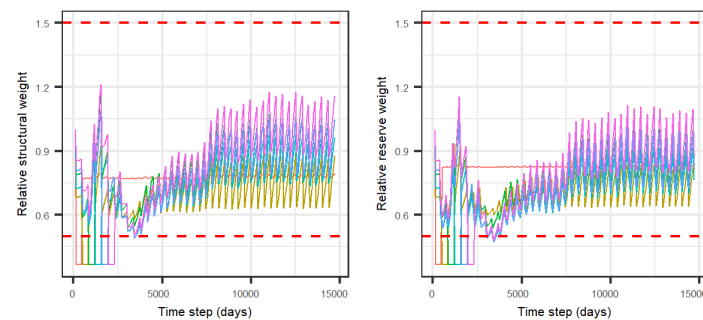

Age class 1 2 3 4 5 6

Megrim

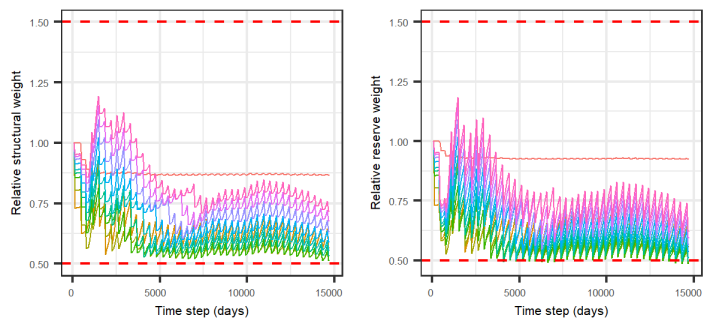

Age class 1 2 3 4 5 6 7 8 9 10

Common sole

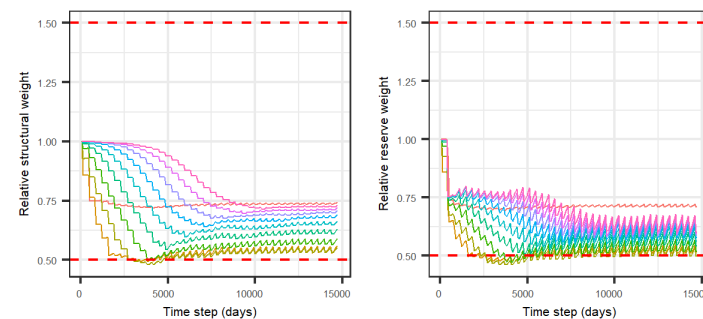

Age class 1 2 3 4 5 6 7 8 9 10

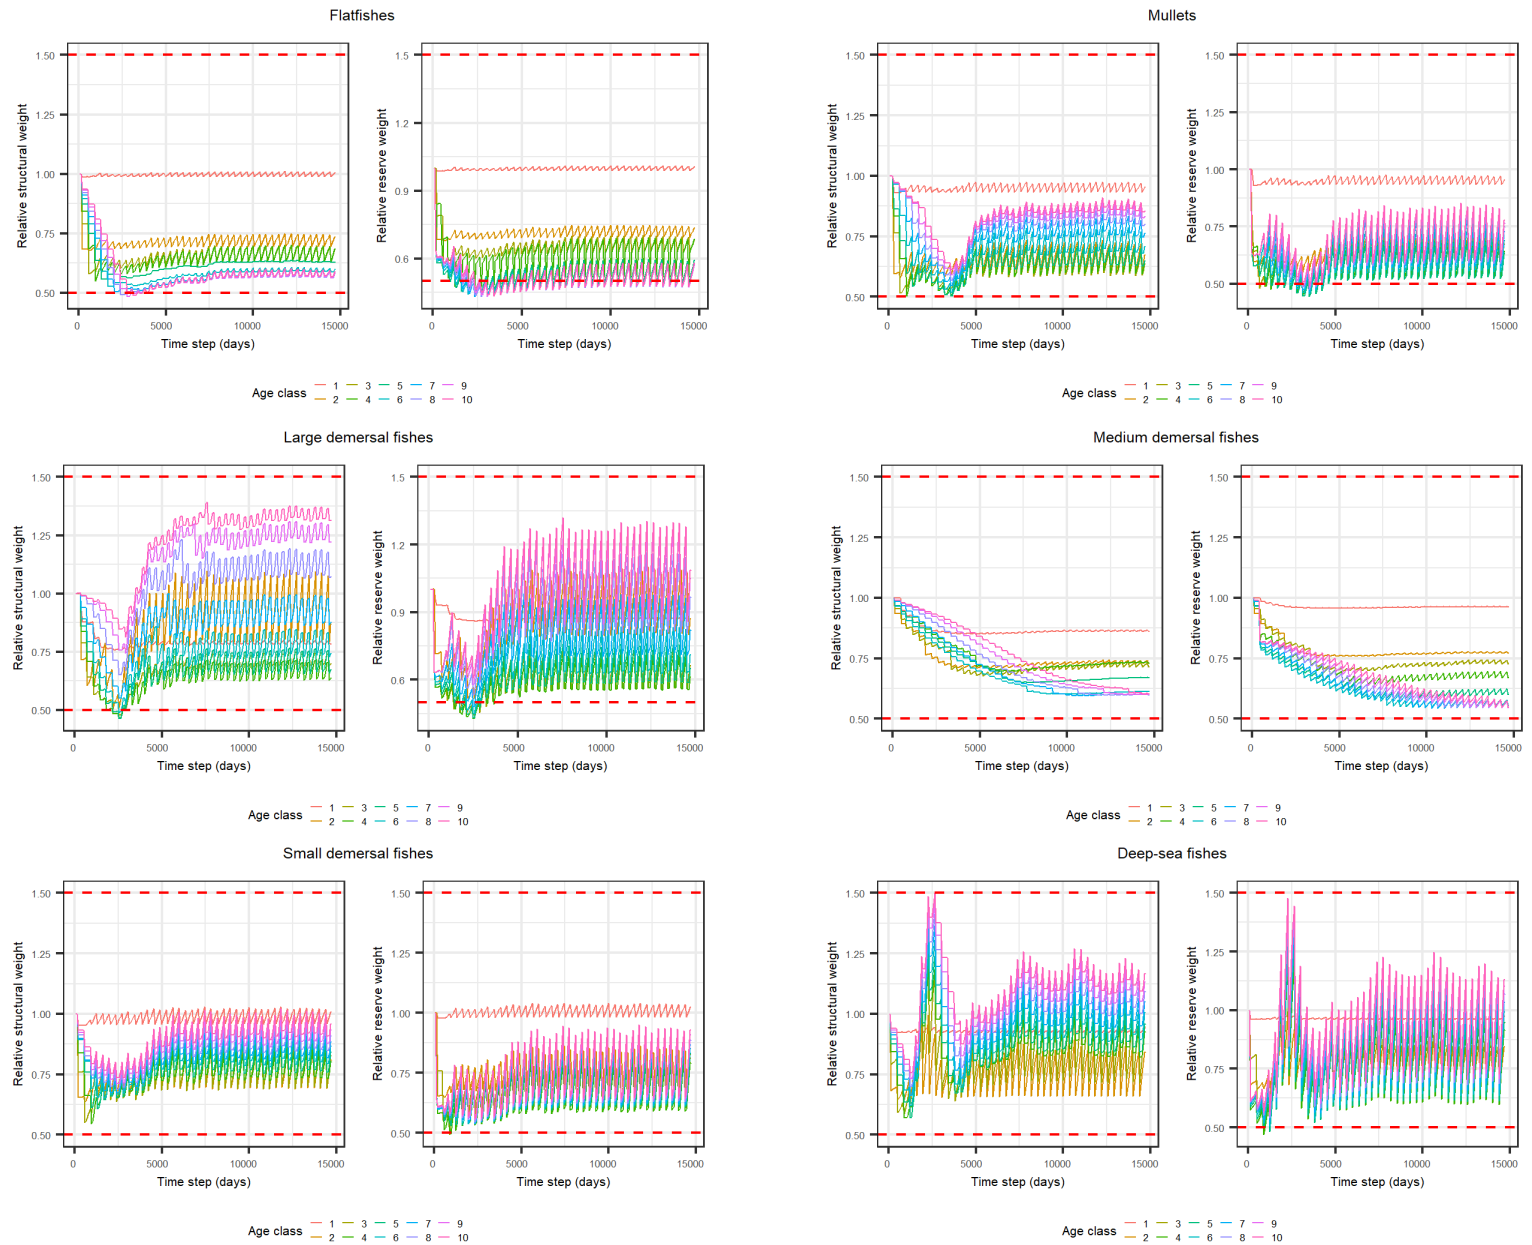

**Figure S3.** Time series of relative weight per age class (structural and reserve weight) of the functional groups across the entire model domain in the 40-year calibration. Dashed red line corresponds to the  $\pm 0.5$  line.

## References

Abaunza, P., Gordo, L., Karlou-Riga, C., Murta, A., Eltink, A. T. G. W., García Santamaría, M. T., Zimmermann, C., Hammer, C., Lucio, P., Iversen, S. A., Molloy, J., and Gallo, E.: Growth and reproduction of horse mackerel, *Trachurus trachurus* (carangidae), *Reviews in Fish Biology and Fisheries*, 13, 27-61 2003.

Abello, P.: Feeding habits of *Macropipus tuberculatus* (Brachyura, Portunidae) off the Catalan coast (NW Mediterranean), *Miscel·lània Zoològica*; Vol.: 13, 13, 2008.

Ajana, R., Techetach, M., and Saoud, Y.: Diet of *Octopus vulgaris* from the moroccan Mediterranean Coast, *Thalassas: An International Journal of Marine Sciences*, 34, 415-420, 2018.

Ajayi, T.: Food and feeding habits of *Raja* species (Batoidei) in Carmarthen Bay, Bristol channel, *Journal of the Marine Biological Association of the United Kingdom*, 62, 215-223, 1982.

Albaina, A. and Irigoien, X.: Zooplankton communities and oceanographic structures in a high-resolution grid in the south-eastern corner of the Bay of Biscay, *Estuarine, Coastal and Shelf Science*, 75, 433-446, 10.1016/j.ecss.2007.05.028, 2007.

Allen, B. M., King, P. A., and Fives, J. M.: Diet of lemon sole *Microstomus kitt* (Walbaun 1792) in Galway Bay, on the West Coast of Ireland, *The Irish Naturalists' Journal*, 329-334, 2004.

Allen, J. A.: Observations on the biology of *Pandalina brevis* [Decapoda; Crustacea], *Journal of the Marine Biological Association of the United Kingdom*, 45, 291-304, 10.1017/s0025315400054837, 1965.

Almeida, P.: Feeding ecology of *Liza ramada* (Risso, 1810)(Pisces, Mugilidae) in a south-western estuary of Portugal, *Estuarine, Coastal and Shelf Science*, 57, 313-323, 2003.

Alonso, H., Almeida, A., Granadeiro, J. P., and Catry, P.: Temporal and age-related dietary variations in a large population of yellow-legged gulls *Larus michahellis*: implications for management and conservation, *European Journal of Wildlife Research*, 61, 819-829, 2015.

Alvarez, D.: The diet of shags *Phalacrocorax aristotelis* in the Cantabrian Sea, northern Spain, during the breeding season, *Seabird*, 22-30, 1998.

Alves, D. M., Cristo, M., Sendão, J., and Borges, T. C.: Diet of the cuttlefish *Sepia officinalis* (Cephalopoda: Sepiidae) off the south coast of Portugal (eastern Algarve), *Journal of the Marine Biological Association of the United Kingdom*, 86, 429-436, 2006.

Anadón, E.: Sobre el jurel del NW de España, 1960.

Anderson, H. B., Evans, P. G., Potts, J. M., Harris, M. P., and Wanless, S.: The diet of Common Guillemot *Uria aalge* chicks provides evidence of changing prey communities in the North Sea, *Ibis*, 156, 23-34, 2014.

Andresen, M. and Kristensen, E.: The importance of bacteria and microalgae in the diet of the deposit-feeding polychaete *Arenicola marina*, *Ophelia*, 56, 179-196, 10.1080/00785236.2002.10409498, 2002.

Animal Diversity Web (ADW): <https://animaldiversity.org/>, last access: 2018.

Ansell, A. D., Comely, C. A., and Robb, L.: Distribution, movements and diet of macrocrustaceans on a Scottish sandy beach with particular reference to predation on juvenile fishes, *Marine Ecology Progress Series*, 176, 115-130, 1999.

Arbault, S. and Lacroix-Boutin, N.: Epoques et aires de ponte des poissons teleosteens du Golfe de Gascogne en 1965-1966 (oeufs et larves), *Revue des Travaux de l'Institut des Pêches Maritimes*, 33, 181-202, 1969.

Arcos, J. M. and Oro, D.: Significance of fisheries discards for a threatened Mediterranean seabird, the Balearic shearwater *Puffinus mauretanicus*, *Marine Ecology Progress Series*, 239, 209-220, 2002.

Arregui, I., Galuardi, B., Goñi, N., Lam, C. H., Fraile, I., Santiago, J., Lutcavage, M., and Arrizabalaga, H.: Movements and geographic distribution of juvenile bluefin tuna in the Northeast Atlantic, described through internal and satellite archival tags, *ICES Journal of Marine Science*, 75, 1560-1572, 10.1093/icesjms/fsy056, 2018.

Audzijonyte, A., Gorton, R., Kaplan, I., and Fulton, E. A.: *Atlantis User's Guide Part I: General Overview, Physics and Ecology*, 2017.

Authier, M., Dorémus, G., Van Canneyt, O., Boubert, J.-J., Gautier, G., Doray, M., Duhamel, E., Massé, J., Petitgas, P., Ridoux, V., and Spitz, J.: Exploring change in the relative abundance of marine megafauna in the Bay of Biscay, 2004–2016, *Progress in Oceanography*, 166, 159-167, 10.1016/j.pocean.2017.09.014, 2018.

Aznar, R., Sotillo, M. G., Cailleau, S., Lorente, P., Levier, B., Amo-Baladrón, A., Reffray, G., and Álvarez-Fanjul, E.: Strengths and weaknesses of the CMEMS forecasted and reanalyzed solutions for the Iberia–Biscay–Ireland (IBI) waters, *Journal of Marine Systems*, 159, 1-14, <https://doi.org/10.1016/j.jmarsys.2016.02.007>, 2016.

Bachiller, E.: Trophic ecology of small pelagic fish in the Bay of Biscay: ecological effects of trophic interactions, Ph. D. Thesis, University of the Basque Country, Leioa, Spain, unpublished, 2013.

Bachiller, E. and Irigoien, X.: Trophodynamics and diet overlap of small pelagic fish species in the Bay of Biscay, *Marine Ecology Progress Series*, 534, 179-198, 2015.

Bagley, P. M., Smith, A., and Priede, I. G.: Tracking movements of deep demersal fishes in the Porcupine Seabight, north-east Atlantic Ocean, *Journal of the Marine Biological Association of the United Kingdom*, 74, 473-480, 1994.

Båmstedt, U. and Karlson, K.: Euphausiid predation on copepods in coastal waters of the Northeast Atlantic, *Marine Ecology Progress Series*, 172, 149-168, 1998.

Barría, C., Coll, M., and Navarro, J.: Unravelling the ecological role and trophic relationships of uncommon and threatened elasmobranchs in the western Mediterranean Sea, *Marine Ecology Progress Series*, 539, 225-240, 2015.

Bayhan, Y. K., Alagoz Erguden, S., and Erguden, D.: Length-Weight Relationships for Three Deep Sea Fish Species in North Eastern Mediterranean, Turkey, *Aquatic Sciences and Engineering*, 35, 89-93, 10.26650/ase2020683520, 2020.

Bergquist, P. R.: *Porifera (Sponges)*, e LS, 2001.

Bergstad, O. A.: Distribution and trophic ecology of some gadoid fish of the Norwegian deep: 1. Accounts of individual species, *Sarsia*, 75, 269-313, 1991.

Bernal, A., Olivar, M. P., and de Puellas, M. L. F.: Feeding patterns of *Lampanyctus pusillus* (Pisces: Myctophidae) throughout its ontogenetic development, *Marine Biology*, 160, 81-95, 2013.

Bernal, A., Olivar, M. P., Maynou, F., and de Puellas, M. L. F.: Diet and feeding strategies of mesopelagic fishes in the western Mediterranean, *Progress in Oceanography*, 135, 1-17, 2015.

Bernárdez, C., Freire, J., and González-Gurriarán, E.: Feeding of the spider crab *Maja squinado* in rocky subtidal areas of the Ría de Arousa (north-west Spain), *Journal of the Marine Biological Association of the United Kingdom*, 80, 95-102, 10.1017/s0025315499001605, 2000.

Bjornsson, B.: Swimming speed and swimming metabolism of Atlantic cod (*Gadus morhua*) in relation to available food: A laboratory study, *Canadian Journal of Fisheries and Aquatic Sciences*, 50, 2542-2551, 1993.

680 Blanchet, H., de Montaudouin, X., Chardy, P., and Bachelet, G.: Structuring factors and recent changes in subtidal macrozoobenthic communities of a coastal lagoon, Arcachon Bay (France), *Estuarine, Coastal and Shelf Science*, 64, 561-576, <https://doi.org/10.1016/j.ecss.2005.03.016>, 2005.

Boyra, G., Martinez, U., Cotano, U., Santos, M., Irigoien, X., and Uriarte, A.: Acoustic surveys for juvenile anchovy in the Bay of Biscay: abundance estimate as an indicator of the next year's recruitment and spatial distribution patterns, *ICES Journal of Marine Science*, 70, 1354-1368, 2013.

685 Brawn, V. M.: Underwater Television Observations of the Swimming Speed and Behaviour of Captive Herring, *Journal of the Fisheries Research Board of Canada*, 17, 689-698, 10.1139/f60-054, 1960.

Browning, E., Bolton, M., Owen, E., Shoji, A., Guilford, T., Freeman, R., and McPherson, J.: Predicting animal behaviour using deep learning: GPS data alone accurately predict diving in seabirds, *Methods in Ecology and Evolution*, 9, 681-692, 10.1111/2041-210x.12926, 2018.

690 Cabral, H.: Comparative feeding ecology of sympatric *Solea solea* and *S. senegalensis*, within the nursery areas of the Tagus estuary, Portugal, *Journal of fish biology*, 57, 1550-1562, 2000.

Cabral, H. and Murta, A.: The diet of blue whiting, hake, horse mackerel and mackerel off Portugal, *Journal of Applied Ichthyology*, 18, 14-23, 2002.

695 Cabral, H. N., Lopes, M., and Loeper, R.: Trophic niche overlap between flatfishes in a nursery area on the Portuguese coast, *Scientia Marina*, 66, 293-300, 2002.

Caill-Milly, N., Lissardy, M., and Léauté, J.-P.: Improvement of the fishery knowledge of striped red mullet of the Bay of Biscay - Working Document for the Working Group on Widely Distributed Stocks (WGWISE), 2017.

700 Calbet, A.: Mesozooplankton grazing effect on primary production: a global comparative analysis in marine ecosystems, *Limnology and Oceanography*, 46, 1824-1830, 2001.

Calbet, A.: The trophic roles of microzooplankton in marine systems, *ICES Journal of Marine Science*, 65, 325-331, 2008.

705 Calbet, A. and Saiz, E.: The ciliate-copepod link in marine ecosystems, *Aquatic Microbial Ecology*, 38, 157-167, 2005.

Calbet, A., Broglio, E., Saiz, E., and Alcaraz, M.: Low grazing impact of mesozooplankton on the microbial communities of the Alboran Sea: a possible case of inhibitory effects by the toxic dinoflagellate *Gymnodinium catenatum*, *Aquatic Microbial Ecology*, 26, 235-246, 2002.

710 Cartes, J.: Feeding habits of pasiphaeid shrimps close to the bottom on the western Mediterranean slope, *Marine Biology*, 117, 459-468, 1993a.

Cartes, J.: Diets of deep-water pandalid shrimps on the Western Mediterranean slope, *Marine Ecology Progress Series*, 96, 49-61, 1993b.

Cartes, J.: Diets of, and trophic resources exploited by, bathyal penaeoidean shrimps from the western Mediterranean, *Marine and Freshwater Research*, 46, 889-996, <https://doi.org/10.1071/MF9950889>, 1995.

715 Cartes, J. E.: Análisis de las comunidades y estructura trófica de los crustáceos decápodos batiales del Mar Catalán, 1991.

Cartes, J. E.: Feeding strategies and partition of food resources in deep-water decapod crustaceans (400–2300 m), *Journal of the Marine Biological Association of the United Kingdom*, 78, 509-524, 1998.

720 Cartes, J. E., Elizalde, M., and Sorbe, J. C.: Contrasting life-histories, secondary production, and trophic structure of Peracarid assemblages of the bathyal suprabenthos from the Bay of Biscay (NE Atlantic) and the Catalan Sea (NW Mediterranean), *Deep Sea Research Part I: Oceanographic Research Papers*, 48, 2209-2232, [https://doi.org/10.1016/S0967-0637\(01\)00012-7](https://doi.org/10.1016/S0967-0637(01)00012-7), 2001.

725 Cartes, J. E., Huguet, C., Parra, S., and Sanchez, F.: Trophic relationships in deep-water decapods of Le Danois bank (Cantabrian Sea, NE Atlantic): trends related with depth and seasonal changes in food quality and availability, *Deep Sea Research Part I: Oceanographic Research Papers*, 54, 1091-1110, 2007.

Castro, B. G. and Guerra, A.: The diet of *Sepia officinalis* (Linnaeus, 1758) and *Sepia elegans* (D'Orbigny, 1835)(Cephalopoda, Sepioidea) from the Ria de Vigo (NW Spain), *Scientia Marina*, 54, 375-388, 1990.

730 Castro, N., Costa, J. L., Domingos, I., and Angelico, M. M.: Trophic ecology of a coastal fish assemblage in Portuguese waters, *Journal of the Marine Biological Association of the United Kingdom*, 93, 1151-1161, 2013.

Certain, G., Ridoux, V., van Canneyt, O., and Bretagnolle, V.: Delphinid spatial distribution and abundance estimates over the shelf of the Bay of Biscay, *ICES Journal of Marine Science*, 65, 656-666, 10.1093/icesjms/fsn046, 2008.

735 Chauvaud, L., Donval, A., Thouzeau, G., Paulet, Y.-M., and Nézan, E.: Variations in food intake of *Pecten maximus* (L.) from the Bay of Brest (France): Influence of environmental factors and phytoplankton species composition, *Comptes Rendus de l'Académie des Sciences - Series III - Sciences de la Vie*, 324, 743-755, [https://doi.org/10.1016/S0764-4469\(01\)01349-X](https://doi.org/10.1016/S0764-4469(01)01349-X), 2001.

Checon, H. H., Pardo, E. V., and Amaral, A. C. Z.: Breadth and composition of polychaete diets and the importance of diatoms to species and trophic guilds, *Helgoland Marine Research*, 70, 19, 10.1186/s10152-016-0469-4, 2016.

740 Christensen, V. and Walters, C. J.: Ecopath with Ecosim: methods, capabilities and limitations, *Ecological Modelling*, 172, 109-139, 10.1016/j.ecolmodel.2003.09.003, 2004.

Claireaux, G., Couturier, C., and Groison, A.-L.: Effect of temperature on maximum swimming speed and cost of transport in juvenile European seabass (&lt;em&gt;Dicentrarchus labrax&lt;/em&gt;), *Journal of Experimental Biology*, 209, 3420, 10.1242/jeb.02346, 2006.

745 Clarke, M., Martins, H., and Pascoe, P.: The diet of sperm whales (*Physeter macrocephalus* Linnaeus 1758) off the Azores, *Philosophical Transactions of the Royal Society of London. Series B: Biological Sciences*, 339, 67-82, 1993.

750 Clarke, M., Clarke, D., Martins, H. R., and Silva, H. M.: The diet of the blue shark (*Prionace glauca* L.) in Azorean waters, *ARQUIPÉLAGO. Ciências Biológicas e Marinhas= Life and Marine Sciences*, 14, 41-56, 1996.

Cleary, A. C., Durbin, E. G., and Rynearson, T. A.: Krill feeding on sediment in the Gulf of Maine (North Atlantic), *Marine Ecology Progress Series*, 455, 157-172, 2012.

755 Clough, S. C., Lee-Elliott, I. E., Turnpenny, A. W. H., S.D.J., H., and Hinks, C.: *Swimming Speeds in Fish: phase 2*, Environment Agency, 2004.

Corrales, X., Preciado, I., Gascuel, D., Lopez de Gamiz-Zearra, A., Hervann, P. Y., Mugerza, E., Louzao, M., Velasco, F., Doray, M., López-López, L., Carrera, P., Cotano, U., and Andonegi, E.: Structure and functioning of the Bay of Biscay ecosystem: A trophic modelling approach, *Estuarine, Coastal and Shelf Science*, 264, 107658, <https://doi.org/10.1016/j.ecss.2021.107658>, 2022.



- 760 Correia, A. T., Manso, S., and Coimbra, J.: Age, growth and reproductive biology of the European conger eel (*Conger conger*) from the Atlantic Iberian waters, *Fisheries Research*, 99, 196-202, <https://doi.org/10.1016/j.fishres.2009.06.002>, 2009.
- Cort, J. L., Cendrero, O., and Iribar, X.: La anchoa del Cantábrico, *Engraulis encrasicolus*. Resultados de las campañas 1974, 75 y 76, *Bol. Inst. esp. Ocean.*, 220, 35, 1976.
- 765 Costa, A. M., Gordo, L., and Manuel Martins, M.: Growth and distribution of mackerel *Scomber scombrus* Linnaeus, 1758 from the west coast of Portugal, 409-421 pp., 10.21411/cbm.a.fcacd9b0, 2017.
- Coulon, P. and Jangoux, M.: Feeding rate and sediment reworking by the holothuroid *Holothuria tubulosa* (Echinodermata) in a Mediterranean seagrass bed off Ischia Island, Italy, *Marine Ecology Progress Series*, 92, 201-204, 1993.
- 770 Cresson, P., Ruitton, S., Ourgaud, M., and Harmelin-Vivien, M.: Contrasting perception of fish trophic level from stomach content and stable isotope analyses: a Mediterranean artificial reef experience, *Journal of Experimental Marine Biology and Ecology*, 452, 54-62, 2014.
- Cristo, M. and Cartes, J. E.: A comparative study of the feeding ecology of *Nephrops norvegicus* (L.), (Decapoda: Nephropidae) in the bathyal Mediterranean and the adjacent Atlantic, *Scientia Marina*, 62, 81-90, 1998.
- 775 Cunha, M. E., Garrido, S., and Pissarra, J.: The use of stomach fullness and colour indices to assess *Sardina pilchardus* feeding, *Journal of the Marine Biological Association of the United Kingdom*, 85, 425-431, 2005.
- Dalpadado, P., Yamaguchi, A., Ellertsen, B., and Johannessen, S.: Trophic interactions of macrozooplankton (krill and amphipods) in the Marginal Ice Zone of the Barents Sea, *Deep Sea Research Part II: Topical Studies in Oceanography*, 55, 2266-2274, 2008.
- 780 Dalsgaard, A. J. T., Pauly, D., and Okey, T. A.: Preliminary mass-balance model of Prince William Sound, Alaska, for the pre-spill period, 1980-1989, 1997.
- De la Serna, J., Godoy, M., Olaso, I., Zabala, J., Majuelos, E., and Báez, J.: Preliminary study on the feeding of bluefin tuna (*Thunnus thynnus*) in the Mediterranean and the Strait of Gibraltar area, *Collect. Vol. Sci. Pap. ICCAT*, 68, 115-132, 2012.
- 785 De Pierrepont, J., Dubois, B., Desormonts, S., Santos, M., and Robin, J.: Stomach contents of English Channel cetaceans stranded on the coast of Normandy, *Journal of the Marine Biological Association of the United Kingdom*, 85, 1539-1546, 2005.
- 790 Dhieb, K., Ghorbel, M., and Bouain, A.: Regime alimentaire de *Pomatomus saltatrix* (Teleostei, Pomatomidae) dans le Golfe de Gabes, Tunisie. *Rapp. Comm. int. Mer Médit*, 36, 259, 2001.
- Doherty, D. and McCarthy, T.: The ecology and conservation of European smelt (*Osmerus eperlanus* L.) from Waterford estuary, in southeastern Ireland, *Biology and Environment: Proceedings of the Royal Irish Academy*, 125-130,
- 795 Domenici, P., Standen, E. M., and Levine, R. P.: Escape manoeuvres in the spiny dogfish (*Squalus acanthias*), *Journal of Experimental Biology*, 207, 2339-2349, 10.1242/jeb.01015, 2004.
- Dorman, J.: Diet of the garfish, *Belone belone* (L.), from Courtmacsherry Bay, Ireland, *Journal of fish biology*, 33, 339-346, 1988.
- 800 Du Sel, G. P., Blanc, A., and Daguzan, J.: The diet of the cuttlefish *Sepia officinalis* L. (Mollusca: Cephalopoda) during its life cycle in the Northern Bay of Biscay (France), *Aquatic Sciences*, 62, 167-178, 2000.

Duarte, R., Azevedo, M., Landa, J., and Pereda, P.: Reproduction of anglerfish (*Lophius budegassa* Spinola and *Lophius piscatorius* Linnaeus) from the Atlantic Iberian Coast, *Fisheries Research*, 51, 349-361, 2001.

805 Dubois, S., Barillé, L., and Retière, C.: Efficiency of particle retention and clearance rate in the polychaete *Sabellaria alveolata* L, *Comptes Rendus Biologies*, 326, 413-421, [https://doi.org/10.1016/S1631-0691\(03\)00124-0](https://doi.org/10.1016/S1631-0691(03)00124-0), 2003.

Dürr, J. and González, J.: Feeding habits of *Beryx splendens* and *Beryx decadactylus* (Berycidae) off the Canary Islands, *Fisheries Research*, 54, 363-374, 2002.

810 Ebert, D. A. and Stehmann, M. F. W.: Sharks, batoids, and chimaeras of the North Atlantic. FAO Species Catalogue for Fishery Purposes. No. 7. Rome, FAO. 523 p, 2013.

Edwards, E. F., Hall, C., Moore, T. J., Sheredy, C., and Redfern, J. V.: Global distribution of fin whales *Balaenoptera physalus* in the post-whaling era (1980–2012), *Mammal Review*, 45, 197-214, 10.1111/mam.12048, 2015.

815 Ellis, J., Pawson, M., and Shackley, S.: The comparative feeding ecology of six species of shark and four species of ray (Elasmobranchii) in the north-east Atlantic, *Journal of the Marine Biological Association of the United Kingdom*, 76, 89-106, 1996.

Ellis, J., Mancusi, C., Serena, F., Haka, F., Guallart, J., Ungaro, N., Coelho, R., Schembri, T., and Mackenzie, K.: *Scyliorhinus canicula*. The IUCN Red List of Threatened Species 2009, 10.2305/IUCN.UK.2009-2.RLTS.T161399A5415204.en, 2009.

820 Fanelli, E. and Cartes, J. E.: Feeding habits of pandalid shrimps in the Alboran Sea (SW Mediterranean): influence of biological and environmental factors, *Marine Ecology Progress Series*, 280, 227-238, 2004.

Fanelli, E., Papiol, V., Cartes, J. E., and Rodriguez-Romeu, O.: Trophic ecology of *Lampanyctus crocodilus* on north-west Mediterranean Sea slopes in relation to reproductive cycle and environmental variables, *Journal of fish biology*, 84, 1654-1688, 2014.

825 FISH, F. E. and HUI, C. A.: Dolphin swimming—a review, *Mammal Review*, 21, 181-195, 10.1111/j.1365-2907.1991.tb00292.x, 1991.

Fortin, M., Bost, C.-A., Maes, P., and Barbraud, C.: The demography and ecology of the European shag *Phalacrocorax aristotelis* in Mor Braz, France, *Aquatic Living Resources*, 26, 179-185, 2013.

830 Freire, J.: Feeding ecology of *Liocarcinus depurator* (Decapoda: Portunidae) in the Ria de Arousa (Galicia, north-west Spain): effects of habitat, season and life history, *Marine Biology*, 126, 297-311, 10.1007/bf00347454, 1996.

FishBase. World Wide Web electronic publication.: [www.fishbase.org](http://www.fishbase.org), version (06/2021).

835 Frutos, I. and Sorbe, J. C.: Suprabenthic assemblages from the Capbreton area (SE Bay of Biscay). Faunal recovery after a canyon turbidity disturbance, *Deep Sea Research Part I: Oceanographic Research Papers*, 130, 36-46, <https://doi.org/10.1016/j.dsr.2017.10.007>, 2017.

Fukuda, R., Ogawa, H., Nagata, T., and Koike, I.: Direct Determination of Carbon and Nitrogen Contents of Natural Bacterial Assemblages in Marine Environments, *Applied and Environmental Microbiology*, 64, 3352, 10.1128/aem.64.9.3352-3358.1998, 1998.

840 Fulton, E. A., Fuller, M., Smith, A. D. M., and Punt, A.: Ecological Indicators of the Ecosystem Effects of Fishing: Final Report, 2004.

Furness, R. W. and Todd, C. M.: Diets and feeding of fulmars *Fulmarus glacialis* during the breeding season: a comparison between St Kilda and Shetland colonies, *Ibis*, 126, 379-387, 1984.



- Furnestin, J.: Note préliminaire sur l'anchois (*Engraulis encrasicolus* L) du Golfe de Gascogne, Rev. Trav. Off. Sci. Tech. Pêches Marit., 13, 197-209, 1945.
- 845 Garcia, V. B., Lucifora, L. O., and Myers, R. A.: The importance of habitat and life history to extinction risk in sharks, skates, rays and chimaeras, Proceedings. Biological sciences, 275, 83-89, 10.1098/rspb.2007.1295, 2008.
- Garrido, S. and Murta, A.: Interdecadal and spatial variations of diet composition in horse mackerel *Trachurus trachurus*, Journal of fish biology, 79, 2034-2042, 2011.
- 850 Geiger, D. L.: Marine gastropoda. The Mollusks: a guide to their study, collection and preservation, Boca Ratón, FL: Universal Publishers, 295-312, 2006.
- Gibson, R. and Ezzi, I.: Feeding relationships of a demersal fish assemblage on the west coast of Scotland, Journal of fish biology, 31, 55-69, 1987.
- 855 Giménez, J., Gómez-Campos, E., Borrell, A., Cardona, L., and Aguilar, A.: Isotopic evidence of limited exchange between Mediterranean and eastern North Atlantic fin whales, Rapid Communications in Mass Spectrometry, 27, 1801-1806, 2013.
- Girardin, R., Fulton, E. A., Lehuta, S., Rolland, M., Thébaud, O., Travers-Trolet, M., Vermard, Y., and Marchal, P.: Identification of the main processes underlying ecosystem functioning in the Eastern English Channel, with a focus on flatfish species, as revealed through the application of the Atlantis end-to-end model, Estuarine, Coastal and Shelf Science, 201, 208-222, 10.1016/j.ecss.2016.10.016, 2018.
- 860 Gomes, F. C. B.: Dieta da torda-mergulheira, Alca torda, capturada acidentalmente em Portugal Continental, 2015.
- Gonçalves, J. M. S. and Erzini, K.: Feeding habits of the two-banded sea bream (*Diplodus vulgaris*) and the black sea bream (*Spondyliosoma gantharus*)(Sparidae) from the south-west coast of Portugal, Cybium, 22, 245-254, 1998.
- 865 González, A., López, A., Guerra, A., and Barreiro, A.: Diets of marine mammals stranded on the northwestern Spanish Atlantic coast with special reference to Cephalopoda, Fisheries Research, 21, 179-191, 1994.
- Goñi, N., Logan, J., Arrizabalaga, H., Jarry, M., and Lutcavage, M.: Variability of albacore (*Thunnus alalunga*) diet in the Northeast Atlantic and Mediterranean Sea, Marine Biology, 158, 1057-1073, 2011a.
- 870 Goñi, N., Fraile, I., Arregui, I., Santiago, J., Laconcha, U., Estonba, A., and Arrizabalaga, H.: On-going albacore research in the Bay of Biscay (Northeast Atlantic): the "Hegaluze 2010" project, Collect. Vol. Sci. Pap. ICCAT, 66, 1956-1965, 2011b.
- 875 Granadeiro, J. P., Monteiro, L. R., and Furness, R. W.: Diet and feeding ecology of Cory's shearwater *Calonectris diomedea* in the Azores, north-east Atlantic, Marine Ecology Progress Series, 166, 267-276, 1998.
- Granhag, L. and Hosia, A.: Feeding and starvation in the native ctenophore *Bolinopsis infundibulum* and the introduced *Mnemiopsis leidyi* in the North Sea: implications for ctenophore transport in ships' ballast water, Journal of Plankton Research, 37, 1006-1010, 2015.
- 880 Guénette, S. and Gascuel, D.: Considering both fishing and climate in a model of the Celtic Sea and the Bay of Biscay: what do we learn, Annual Science Conference. ICES Document CM,
- Hamer, K., Phillips, R., Wanless, S., Harris, M., and Wood, A.: Foraging ranges, diets and feeding locations of gannets *Morus bassanus* in the North Sea: evidence from satellite telemetry, Marine Ecology Progress Series, 200, 257-264, 2000.

- 885 Hansen, C., Skern-Mauritzen, M., Meeren, G. I. v. d., Jähkel, A., and Drinkwater, K.: Set-up of the Nordic and Barents Seas (NoBa) Atlantis model, 2016.
- Hansson, L. J., Moeslund, O., Kiørboe, T., and Riisgård, H. U.: Clearance rates of jellyfish and their potential predation impact on zooplankton and fish larvae in a neritic ecosystem (Limfjorden, Denmark), *Marine Ecology Progress Series*, 304, 117-131, 2005.
- 890 Haug, T., Gjørseter, H., Lindstrøm, U., and Nilssen, K. T.: Diet and food availability for north-east Atlantic minke whales (*Balaenoptera acutorostrata*), during the summer of 1992, *ICES Journal of Marine Science*, 52, 77-86, 1995.
- Heral, M.: Traditional oyster culture in France, *Barnabe Aquaculture*, 342-387, Open Access version : <https://archimer.ifremer.fr/doc/00000/3039/>, 1989.
- 895 Hernández López, J. L.: Biología, ecología y pesca del pulpo común *Octopus vulgaris*, Cuvier 1797 en aguas de Gran Canaria, 2000.
- Hubans, B., Chouvelon, T., Begout, M.-L., Biais, G., Bustamante, P., Ducci, L., Mornet, F., Boiron, A., Coupeau, Y., and Spitz, J.: Trophic ecology of commercial-size meagre, *Argyrosomus regius*, in the Bay of Biscay (NE Atlantic), *Aquatic Living Resources*, 30, 9, 2017.
- 900 ICCAT: Atlantic Bonito. ICCAT Manual, in, In: ICCAT Publications [on-line]. Updated 2016. [Cited 01/27/]. 2006-2016a.
- ICCAT: Albacore. ICCAT Manual, in, In: ICCAT Publications [on-line]. Updated 2016. [Cited 01/27/]. 2006-2016b.
- ICCAT: Atlantic Bluefin Tuna. ICCAT Manual, in, In: ICCAT Publications [on-line]. Updated 2016. [Cited 01/27/]. 2006-2016c.
- 905 ICCAT: Report of the 2016 ICCAT North and South Atlantic albacore stock assessment meeting. Madeira, April 28 to May 6, 2016.
- ICCAT: Report of the 2017 ICCAT Bluefin Stock Assessment meeting. Madrid, 20-28 July, 2017.
- ICES: Stock annex: Portuguese dogfish (*Centroscymnus coelolepis*, *Centrophorus squamosus*) in subareas 1-10, 12 and 14 (the Northeast Atlantic and adjacent waters) - Working Group on Elasmobranch Fishes (WGEF), 2010a.
- 910 ICES: Report of the Working Group on Anchovy and Sardine (WGANSA), 24–28 June 2010, Vigo, Spain. ICES CM 2010/ACOM:16. 290 pp., 2010b.
- ICES: Report of the Workshop on Age reading of European anchovy (WKARA), 9-13 November 2009, Sicily, Italy. ICES CM 2009/ACOM:43. 122 pp., 2010c.
- 915 ICES: Stock Annex: Alfonsinos (*Beryx* spp.) in subareas 1-10, 12 and 14 (the Northeast Atlantic and adjacent waters) - Working Group on Biology and Assessment of Deep-sea Fisheries Resources (WGDEEP), 2011.
- ICES: ICES Phytoplankton and Microbial Plankton Status Report 2009/2010 ICES Cooperative Research Report No. 313, 196 pp., <https://doi.org/10.17895/ices.pub.5407>, 2012.
- 920 ICES: Stock Annex: Seabass (*Dicentrarchus labrax*) in divisions 8.c and 9.a (southern Bay of Biscay and Atlantic Iberian waters) - Working Group for the Bay of Biscay and the Iberic waters Ecoregion (WGBIE), 2013.
- ICES: Report of the ICES Advisory Committee 2014. ICES Advice, 2014. Book 7. 249 pp., 2014a.
- 925 ICES: Stock Annex: Northeast Atlantic Boarfish - Working Group on Widely Distributed Stocks (WGWIDE), 2014b.

ICES: Stock Annex: Sole (*Solea spp.*) in divisions 8.c and 9.a (Cantabrian Sea and Atlantic Iberian waters) - Working Group for the Bay of Biscay and Iberian Waters Ecoregion (WGBIE), 2014c.

930 ICES: Stock Annex: Megrim (*Lepidorhombus whiffiagonis*) in divisions 8.c and 9.a (Cantabrian Sea and Atlantic Iberian waters) - Working Group for the Bay and Iberian Waters Ecoregion (WGBIE), 2014d.

ICES: Stock Annex: Striped red mullet (*Mullus surmuletus*) in Subarea 4 and divisions 7.d and 3.a (North Sea, eastern English Channel, Skagerrak and Kattegat) - Working Group on the Assessment of Demersal Stock in the North Sea and Skagerrak (WGNSSK), 2015.

935 ICES: Stock Annex: Sole (*Solea solea*) in divisions 8.a–b (northern and central Bay of Biscay) - Working Group for the Bay of Biscay and the Iberian Waters Ecoregion (WGBIE) 2016a.

ICES: Stock Annex: Hake (*Merluccius merluccius*) in subareas 4, 6, and 7, and in divisions 3.a, 8.a–b, and 8.d, Northern stock (Greater North Sea, Celtic Seas, and the northern Bay of Biscay) - Working Group for the Bay of Biscay and the Iberic waters Ecoregion (WGBIE), 2016b.

940 ICES: Stock Annex: Blue whiting (*Micromesistius poutassou*) in subareas 1-9, 12, and 14 (Northeast Atlantic and adjacent waters) - Working Group on Widely Distributed Stocks (WGWIDE), 2016c.

ICES: Stock Annex: Norway lobster (*Nephrops norvegicus*) in Division 8.c, Functional Unit 25 (southern Bay of Biscay and northern Galicia) - Working Group for the Bay of Biscay and the Iberian Waters Ecoregion (WGBIE), 2016d.

945 ICES: Stock Annex: Southern Sardine stock Annex (Divisions 8.c and 9.a) - Working Group on the Assessment of Southern Horse-Mackerel, Anchovy and Sardine (WGHANSA), 2017a.

ICES: Stock Annex: Hake (*Merluccius merluccius*) in divisions 8.c and 9.a, Southern stock (Cantabrian Sea and Atlantic Iberian waters) - Working Group for the Bay of Biscay and the Iberian Waters Ecoregion (WGBIE), 2017b.

950 ICES: Stock Annex: Sardine in divisions 8abd - Working Group on Anchovy and Sardine and Southern Horse Mackerel (WGHANSA), 2017c.

ICES: Manual of the IBTS North Eastern Atlantic Surveys, 92, 2017d.

ICES: ICES WGWIDE Report Northeast Atlantic Mackerel, 2017e.

ICES: Stock Annex: Horse mackerel (*Trachurus trachurus*) in Subarea 8 and divisions 2.a, 4.a, 5.b, 6.a, 7.a–c, e–k (the Northeast Atlantic) - Working Group on Widely Distributed Stocks (WGWIDE), 2017f.

955 ICES: Stock Annex: Mackerel (*Scomber scombrus*) in subareas 1-7 and 14 and divisions 8.a-e, 9.a (the Northeast Atlantic and adjacent waters) - Working Group on Widely Distributed Stocks (WGWIDE), 2017g.

ICES: Stock Annex: seabass (*Dicentrarchus labrax*) in division 8ab (Bay of Biscay) - Working Group for the Bay of Biscay and the Iberian Waters Ecoregion (WGBIE), 2018a.

960 ICES: Stock Annex: Megrim (*Lepidorhombus whiffiagonis*) in divisions 7.b-k, 8.a,b,d (west and southwest of Ireland, Bay of Biscay) - Working Group for the Bay of Biscay and the Iberian Waters Ecoregion (WGBIE), 2018b.

ICES: Stock Annex: White anglerfish (*Lophius piscatorius*) in divisions 7.b–k, 8.a,b,d (southern Celtic Seas, Bay of Biscay) - Working Group for the Bay of Biscay and the Iberian Waters Ecoregion (WGBIE), 2018c.

965 ICES: Report of the Benchmark Workshop on Anglerfish Stocks in the ICES Area (WKANGLER), 12–16 February 2018, Copenhagen, Denmark. ICES CM 2018/ACOM:31. 177 pp., 2018d.

ICES: Stock Annex: White anglerfish (*Lophius piscatorius*) in divisions 8.c and 9.a (Cantabrian Sea and Atlantic Iberian waters) - Working Group for the Bay of Biscay and Iberian Waters Ecoregion (WGBIE), 2018e.

970 ICES: Report of the Workshop on Length-Based Indicators and Reference Points for Elasmobranchs (WKSHARK4), 6 -9 February 2018, Ifremer, Nantes (France). 112 pp., 2018f.

ICES: SISP 6 - Manual for mackerel and horse mackerel egg surveys, sampling at sea. Series of ICES Survey Protocols (2012–2020), <https://doi.org/10.17895/ices.pub.5140> 2019a.

975 ICES: Anchovy (*Engraulis encrasicolus*) in Subarea 8 (Bay of Biscay). In Report of the ICES Advisory Committee, 2019. ICES Advice 2019, ane.27.8, <https://doi.org/10.17895/ices.advice.5544>, 2019b.

Irvine, S. B., Daley, R. K., Graham, K. J., and D Stevens, J. D.: Biological vulnerability of two exploited sharks of the genus *Deania* (Centrophoridae), 1181-1206 pp., 10.1111/j.1095-8649.2012.03262.x, 2012.

Jansen, T. and Gislason, H.: Population Structure of Atlantic Mackerel (*Scomber scombrus*), PloS one, 8, 10.1371/journal.pone.0064744.g001, 2013.

980 Jennings, S., Greenstreet, S. P. R., and Reynolds, J. D.: Structural change in exploited fish community: a consequence of differential fishing effects on species with contrasting life histories, *Journal of Animal Ecology*, 68, 617-627, 1999.

Jorgensen, S. E., Nielsen, S. N., and Jorgensen, L.: Handbook of ecological parameters and ecotoxicology, Elsevier, 1991.

985 Joyce, W., Campana, S., Natanson, L., Kohler, N., Pratt Jr, H., and Jensen, C.: Analysis of stomach contents of the porbeagle shark (*Lamna nasus* Bonnaterre) in the northwest Atlantic, *ICES Journal of Marine Science*, 59, 1263-1269, 2002.

Juan, S. d., Cartes, J. E., and Demestre, M.: Effects of commercial trawling activities in the diet of the flat fish *Citharus linguatula* (Osteichthyes: Pleuronectiformes) and the starfish *Astropecten irregularis* (Echinodermata: Asteroidea), *Journal of Experimental Marine Biology and Ecology*, 349, 152-169, <https://doi.org/10.1016/j.jembe.2007.05.003>, 2007.

990 Jumars, P. A., Dorgan, K. M., and Lindsay, S. M.: Diet of Worms Emended: An Update of Polychaete Feeding Guilds, *Annual Review of Marine Science*, 7, 497-520, 10.1146/annurev-marine-010814-020007, 2015.

995 Kacher, M. and Amara, R.: Distribution and growth of 0-group European hake in the Bay of Biscay and Celtic Sea: a spatial and inter-annual analyses, *Fisheries Research*, 71, 373-378, 10.1016/j.fishres.2004.08.034, 2005.

Kadri, H., Marouani, S., Saïdi, B., Bradai, M., Bouaïn, A., and Morize, E.: Age, growth, sexual maturity and reproduction of the thornback ray, *Raja clavata* (L.), of the Gulf of Gabès (south-central Mediterranean Sea), 10.1080/17451000.2013.797584, 2014.

2000 Klimley, A., Beavers, S., Curtis, T., and Jorgensen, S.: Movements and Swimming Behavior of Three Species of Sharks in La Jolla Canyon, California, *Environmental Biology of Fishes*, 63, 117-135, 10.1023/a:1014200301213, 2002.

2005 Korta, M., Garcia, D., Santurtún, M., Goikoetxea, N., Andonegi, E., Murua, H., Alvarez, P., Cerviño, S., Castro, J., and Murillas, A.: European hake (*Merluccius merluccius*) in the Northeast Atlantic Ocean, in, 1-37, 10.1002/9781118568262.ch1, 2015.

Lagardère, J.: Recherches sur la distribution verticale et sur l'alimentation des Crustacés Décapodes benthiques de la pente continentale du golfe de Gascogne. Analyse des groupements carcinologiques, 1977.

- 2010 Lamb, P. D., Hunter, E., Pinnegar, J. K., Doyle, T. K., Creer, S., and Taylor, M. I.: Inclusion of jellyfish in 30+ years of Ecopath with Ecosim models, *ICES Journal of Marine Science*, 76, 1941-1950, 2019.
- Landa, J. and Piñeiro, C.: Megrim (*Lepidorhombus whiffiagonis*) growth in the North-eastern Atlantic based on back-calculation of otolith rings, *ICES Journal of Marine Science*, 57, 1077-1090, 10.1006/jmsc.2000.0702, 2000.
- 2015 Landa, J., Pereda, P., Duarte, R., and Azevedo, M.: Growth of anglerfish (*Lophius piscatorius* and *L. budegassa*) in Atlantic Iberian waters, *Fisheries Research*, 51, 363-376, [https://doi.org/10.1016/S0165-7836\(01\)00260-0](https://doi.org/10.1016/S0165-7836(01)00260-0), 2001.
- Langdon, C. J. and Newell, R. I. E.: Utilization of detritus and bacteria as food sources by two bivalve suspension-feeders, the oyster *Crassostrea virginica* and the mussel *Geukensia demissa*, *Marine Ecology Progress Series*, 58, 299-310, 1990.
- Lankov, A., Ojaveer, H., Simm, M., Pöllupüü, M., and Möllmann, C.: Feeding ecology of pelagic fish species in the Gulf of Riga (Baltic Sea): the importance of changes in the zooplankton community, *Journal of fish biology*, 77, 2268-2284, 2010.
- 2025 Laran, S., Authier, M., Blanck, A., Doremus, G., Falchetto, H., Monestiez, P., Pettex, E., Stephan, E., Van Canneyt, O., and Ridoux, V.: Seasonal distribution and abundance of cetaceans within French waters- Part II: The Bay of Biscay and the English Channel, *Deep Sea Research Part II: Topical Studies in Oceanography*, 141, 31-40, <https://doi.org/10.1016/j.dsr2.2016.12.012>, 2017.
- Lastra, M., de La Huz, R., Sánchez-Mata, A. G., Rodil, I. F., Aerts, K., Beloso, S., and López, J.: Ecology of exposed sandy beaches in northern Spain: Environmental factors controlling macrofauna communities, *Journal of Sea Research*, 55, 128-140, <https://doi.org/10.1016/j.seares.2005.09.001>, 2006.
- 2030 Le Loc'h, F., Hily, C., and Grall, J.: Benthic community and food web structure on the continental shelf of the Bay of Biscay (North Eastern Atlantic) revealed by stable isotopes analysis, *Journal of Marine Systems*, 72, 17-34, <https://doi.org/10.1016/j.jmarsys.2007.05.011>, 2008.
- Lehane, C. and Davenport, J.: Ingestion of mesozooplankton by three species of bivalve; *Mytilus edulis*, *Cerastoderma edule* and *Aequipecten opercularis*, *Journal of the Marine Biological Association of the United Kingdom*, 82, 615-619, 10.1017/s0025315402005957, 2002.
- 2035 Leitao, F., Santos, M. N., and Monteiro, C. C.: Contribution of artificial reefs to the diet of the white sea bream (*Diplodus sargus*), *ICES Journal of Marine Science*, 64, 473-478, 2007.
- Leitão, R., Martinho, F., Neto, J., Cabral, H., Marques, J., and Pardal, M.: Feeding ecology, population structure and distribution of *Pomatoschistus microps* (Krøyer, 1838) and *Pomatoschistus minutus* (Pallas, 1770) in a temperate estuary, Portugal, *Estuarine, Coastal and Shelf Science*, 66, 231-239, 2006.
- 2040 Letaconnoux, R.: Contribution à l'étude des espèces du genre *Trachurus* et spécialement du *Trachurus trachurus* (Linné 1758), 1951.
- Lewis, J. B.: Feeding behaviour and feeding ecology of the Octocorallia (Coelenterata: Anthozoa), *Journal of Zoology*, 196, 371-384, <https://doi.org/10.1111/j.1469-7998.1982.tb03509.x>, 1982.
- 2045 Lilley, M., Houghton, J., and Hays, G.: Distribution, extent of inter-annual variability and diet of the bloom-forming jellyfish *Rhizostoma* in European waters, *Journal of the Marine Biological Association of the United Kingdom*, 89, 39-48, 2009.
- 2050 Liria, P., del Campo, A., Andrés, M., Muxika, I., Franco, J., Rodríguez, J. G., Bald, J., Ferrer, L., Menchaca, I., Revilla, M., Solaun, O., and González, M.: Polígono para el cultivo extensivo y comercial de moluscos

bivalvos y otros invertebrados de interés en el tramo litoral del Dominio Público Marítimo Terrestre (DPMT) entre Ondarroa y Lekeitio (Bizkaia, País Vasco), 2016.

Logan, J. M., Rodríguez-Marín, E., Goni, N., Barreiro, S., Arrizabalaga, H., Golet, W., and Lutcavage, M.: Diet of young Atlantic bluefin tuna (*Thunnus thynnus*) in eastern and western Atlantic foraging grounds, *Marine Biology*, 158, 73-85, 2011.

Lopes, M., Murta, A., and Cabral, H.: The ecological significance of the zooplanktivores, snipefish *Macroramphosus* spp. and boarfish *Capros aper*, in the food web of the south-east North Atlantic, *Journal of fish biology*, 69, 363-378, 2006.

López-López, L., Preciado, I., Velasco, F., Olaso, I., and Gutiérrez-Zabala, J.: Resource partitioning amongst five coexisting species of gurnards (Scorpaeniforme: Triglidae): Role of trophic and habitat segregation, *Journal of Sea Research*, 66, 58-68, 2011.

López López, L.: Trophic structure and functioning of the marine food webs on the North-Atlantic continental shelf of the Iberian peninsula: implications of the benthic-pelagic coupling, Departamento de Biología de Organismos y Sistemas, Universidad de Oviedo, 2017.

Lordan, C., Burnell, G., and Cross, T.: The diet and ecological importance of *Illex coindetii* and *Todaropsis eblanae* (Cephalopoda: Ommastrephidae) in Irish waters, *African Journal of Marine Science*, 20, 1998.

Lordan, C., Collins, M. A., Key, L. N., and Browne, E. D.: The biology of the ommastrephid squid, *Todarodes sagittatus*, in the north-east Atlantic, *Journal of the Marine Biological Association of the United Kingdom*, 81, 299-306, 2001.

Lourido, A., Parra, S., and Sánchez, F.: A comparative study of the macrobenthic infauna of two bathyal Cantabrian Sea areas: The Le Danois Bank and the Avilés Canyon System (S Bay of Biscay), *Deep Sea Research Part II: Topical Studies in Oceanography*, 106, 141-150, <https://doi.org/10.1016/j.dsr2.2013.09.039>, 2014.

Lucio, P. and Martin, I.: Biological aspects of horse mackerel (*Trachurus trachurus* L. 1758) in the Bay of Biscay in 1987 and 1988, *ICES CM*, 28-21, 1989.

Lucio, P. and Uriarte, A.: Aspects of the reproductive biology of the anchovy (*Engraulis encrasicolus* L. 1758) during 1987 and 1988 in the Bay of Biscay, *Ices Council Meeting*, Magalhães, W. F. and Barros, F.: Structural and functional approaches to describe polychaete assemblages: ecological implications for estuarine ecosystems, *Marine and Freshwater Research*, 62, 918-926, <https://doi.org/10.1071/MF10277>, 2011.

Mahe, K., Amara, R., Bryckaert, T., Kacher, M., and Brylinski, J.-M.: Ontogenetic and spatial variation in the diet of hake (*Merluccius merluccius*) in the Bay of Biscay and the Celtic Sea, *ICES Journal of Marine Science*, 64, 1210-1219, 2007.

Maia, A., Queiroz, N., Correia, J. P., and Cabral, H.: Food habits of the shortfin mako, *Isurus oxyrinchus*, off the southwest coast of Portugal, *Environmental Biology of Fishes*, 77, 157-167, 2006.

Maitland, P. S. and Lyle, A. A.: Ecology of allis shad *Alosa alosa* and twaite shad *Alosa fallax* in the Solway Firth, Scotland, *Hydrobiologia*, 534, 205-221, 2005.

Marçalo, A., Nicolau, L., Giménez, J., Ferreira, M., Santos, J., Araújo, H., Silva, A., Vingada, J., and Pierce, G. J.: Feeding ecology of the common dolphin (*Delphinus delphis*) in Western Iberian waters: has the decline in sardine (*Sardina pilchardus*) affected dolphin diet?, *Marine Biology*, 165, 1-16, 2018.

Marquis, E., Niquil, N., Delmas, D., Hartmann, H., Bonnet, D., Carlotti, F., Herbland, A., Labry, C., Sautour, B., and Laborde, P.: Inverse analysis of the planktonic food web dynamics related to phytoplankton



- bloom development on the continental shelf of the Bay of Biscay, French coast, *Estuarine, Coastal and Shelf Science*, 73, 223-235, 2007.
- 2095 Martinussen, M. and Båmstedt, U.: Diet, estimated daily food ration and predator impact by the scyphozoan jellyfishes *Aurelia aurita* and *Cyanea capillata*, *Ecology of fjords and coastal waters*, 1, 127-145, 1995.
- Masse, J., Uriarte, A., Angélico, M., and Carrera, P.: Pelagic survey series for sardine and anchovy in ICES subareas 8 and 9—Towards an ecosystem approach 1017-6195, 2018.
- 2100 Massé, J.: Acoustic observations in the Bay of Biscay: schooling, vertical distribution, species assemblages and behaviour, *Scientia Marina*, 60, 227-234, 1996.
- Meynier, L., Pusineri, C., Spitz, J., Santos, M. B., Pierce, G. J., and Ridoux, V.: Intraspecific dietary variation in the short-beaked common dolphin *Delphinus delphis* in the Bay of Biscay: importance of fat fish, *Marine Ecology Progress Series*, 354, 277-287, 2008.
- 2105 Mirra, R. J. M.: Migration strategy, diet & foraging ecology of a small seabird in a changing environment, Cardiff University (United Kingdom), 2010.
- Modica, L., Cartes, J. E., and Carrassón, M.: Food consumption of five deep-sea fishes in the Balearic Basin (western Mediterranean Sea): are there daily feeding rhythms in fishes living below 1000 m?, *Journal of fish biology*, 85, 800-820, 2014.
- 2110 Monfort, A. F.: Alimentación de *Palaemon adspersus* (Rathke, 1837) y *Palaemon serratus* (Pennant, 1777) (Decapoda: natantia) en la ría de Vigo (N.O. España), 1986.
- Morato, T., Sola, E., Grós, M. P., and Menezes, G.: Diets of thornback ray (*Raja clavata*) and tope shark (*Galeorhinus galeus*) in the bottom longline fishery of the Azores, northeastern Atlantic, *Fishery Bulletin*, 101, 590-602, 2003.
- 2115 Morato, T., Solà, E., Grós, M. P., and Menezes, G.: Feeding habits of two congener species of seabreams, *Pagellus bogaraveo* and *Pagellus acarne*, off the Azores (northeastern Atlantic) during spring of 1996 and 1997, *Bulletin of Marine Science*, 69, 1073-1087, 2001.
- Moreno, R., Jover, L., Munilla, I., Velando, A., and Sanpera, C.: A three-isotope approach to disentangling the diet of a generalist consumer: the yellow-legged gull in northwest Spain, *Marine Biology*, 157, 545-553, 2010.
- 2120 Moura, T., Figueiredo, I., Bordalo-Machado, P., and Gordo, L. S.: Feeding habits of *Chimaera monstrosa* L.(Chimaeridae) in relation to its ontogenetic development on the southern Portuguese continental slope, *Marine Biology Research*, 1, 118-126, 2005.
- Navarro, J., López, L., Coll, M., Barría, C., and Sáez-Liante, R.: Short-and long-term importance of small sharks in the diet of the rare deep-sea shark *Dalatias licha*, *Marine Biology*, 161, 1697-1707, 2014.
- 2125 Navarro, J., Sáez-Liante, R., Albo-Puigserver, M., Coll, M., and Palomera, I.: Feeding strategies and ecological roles of three predatory pelagic fish in the western Mediterranean Sea, *Deep Sea Research Part II: Topical Studies in Oceanography*, 140, 9-17, 2017.
- Nazarov, N. A. and Dobrusin, M. S.: *Trudy VNIRO*, 121, 40-48, 1977.
- 2130 Neiva, J., Coelho, R., and Erzini, K.: Feeding habits of the velvet belly lanternshark *Etmopterus spinax* (Chondrichthyes: Etmopteridae) off the Algarve, southern Portugal, *Journal of the Marine Biological Association of the United Kingdom*, 86, 835-841, 2006.
- Nerot, C., Lorrain, A., Grall, J., Gillikin, D. P., Munaron, J.-M., Le Bris, H., and Paulet, Y.-M.: Stable isotope variations in benthic filter feeders across a large depth gradient on the continental shelf, *Estuarine, Coastal and Shelf Science*, 96, 228-235, <https://doi.org/10.1016/j.ecss.2011.11.004>, 2012.

- 2135 Neves, A., Sequeira, V., Paiva, R. B., Vieira, A. R., and Gordo, L. S.: Feeding habits of the bluemouth, *Helicolenus dactylopterus dactylopterus* (Delaroche, 1809)(Pisces: Sebastidae) in the Portuguese coast, *Helgoland Marine Research*, 66, 189-197, 2012.
- Neves, A., Sequeira, V., Vieira, A. R., Paiva, R., and Gordo, L. S.: Feeding habits of the cuttlefish *Sepia officinalis* during its life cycle in the Sado estuary (Portugal), *Hydrobiologia*, 636, 479-488, 2009.
- 2140 Nikolic, N., Morandea, G., Hoarau, L., West, W., Arrizabalaga, H., Hoyle, S., Nicol, S. J., Bourjea, J., Puech, A., Farley, J. H., Williams, A. J., and Fonteneau, A.: Review of albacore tuna, *Thunnus alalunga*, biology, fisheries and management, *Reviews in Fish Biology and Fisheries*, 27, 775-810, 10.1007/s11160-016-9453-y, 2016.
- Norsk Polarinstitutt: <https://www.npolar.no/>, last access: 2018.
- 2145 O'Connell, M. and Fives, J. M.: The biology of the lesser sand-eel *Ammodytes tobianus* L. in the Galway Bay area, *Biology and Environment: Proceedings of the Royal Irish Academy*, 87-98,
- Olaso-Toca, L. I., Cendrero-Uceda, O., and Abaunza-Martínez, P.: The diet of the horse mackerel, *Trachurus trachurus* (Linnaeus 1758), in the Cantabrian Sea (north of Spain), 1999.
- Olaso, I., Gutiérrez, J. L., Villamor, B., Carrera, P., Valdés, L., and Abaunza, P.: Seasonal changes in the north-eastern Atlantic mackerel diet (*Scomber scombrus*) in the north of Spain (ICES Division VIIIc), *Journal of the Marine Biological Association of the United Kingdom*, 85, 415-418, 2005.
- 2150 Olaso, I., Velasco, F., Sánchez, F., Serrano, A., Rodríguez-Cabello, C., and Cendrero, O.: Trophic relations of lesser-spotted catshark (*Scyliorhinus canicula*) and blackmouth catshark (*Galeus melastomus*) in the Cantabrian Sea, *Journal of Northwest Atlantic Fishery Science*, 35, 481-494, 2005.
- 2155 Page, H. M. and Lastra, M.: Diet of intertidal bivalves in the Ría de Arosa (NW Spain): evidence from sTable S3 and N isotope analysis, *Marine Biology*, 143, 519-532, 10.1007/s00227-003-1102-z, 2003.
- Pais, C.: Diet of a deep-sea fish, *Hoplostethus mediterraneus*, from the south coast of Portugal, *Journal of the Marine Biological Association of the United Kingdom*, 82, 351-352, 2002.
- SeaLifeBase. World Wide Web electronic publication.: [www.sealifebase.org](http://www.sealifebase.org), version (08/2021).
- 2160 Parker-Humphreys, M.: Distribution and relative abundance of demersal fishes from beam trawl surveys in the Irish Sea (ICES Division VIIa). 1993-2001. *Sci. Ser. Tech Rep.*, CEFAS Lowestoft, 120: 68pp., 2004.
- Paulo-Martins, C., Vinagre, C., Silva, A., and Cabral, H.: Variation of diet and food consumption of the scaldfish *Arnoglossus laterna* (Walbaum, 1792), *Journal of Applied Ichthyology*, 27, 977-983, 2011.
- Pauly, D., Graham, W., Libralato, S., Morissette, L., and Palomares, M. D.: Jellyfish in ecosystems, online databases, and ecosystem models, in: *Jellyfish blooms: Causes, consequences, and recent advances*, Springer, 67-85, 2008.
- 2165 Perez, V., Olivier, F., Tremblay, R., Neumeier, U., Thébault, J., Chauvaud, L., and Meziane, T.: Trophic resources of the bivalve, *Venus verrucosa*, in the Chausey archipelago (Normandy, France) determined by stable isotopes and fatty acids, *Aquatic Living Resources*, 26, 229-239, 10.1051/alr/2013058, 2013.
- 2170 Pérez, V., Marquiegui, M. A., and Belzunce, M. J.: Life history and production of *Corophium urdaibaiense* (Crustacea: Amphipoda) in the Urdaibai estuary (NE Spain), *Marine Biology*, 151, 1163-1174, 10.1007/s00227-006-0558-z, 2007.
- Perrin, W. F., Würsig, B., and Thewissen, J. G. M.: *Encyclopedia of Marine Mammals*, 2009.
- 2175 Pettex, E., Laran, S., Authier, M., Blanck, A., Dorémus, G., Falchetto, H., Lambert, C., Monestiez, P., Stéfan, E., Van Canneyt, O., and Ridoux, V.: Using large scale surveys to investigate seasonal variations



in seabird distribution and abundance. Part II: The Bay of Biscay and the English Channel, Deep Sea Research Part II: Topical Studies in Oceanography, 141, 86-101, 10.1016/j.dsr2.2016.11.012, 2017.

The Online Guide to the Animals of Trinidad and Tobago.

Pierce, G. J., Boyle, P. R., Hastie, L. C., and Santos, M. B.: Diets of squid *Loligo forbesi* and *Loligo vulgaris* in the northeast Atlantic, Fisheries Research, 21, 149-163, 1994.

Pierce, G. J., Santos, M., Reid, R., Patterson, I., and Ross, H.: Diet of minke whales *Balaenoptera acutorostrata* in Scottish (UK) waters with notes on strandings of this species in Scotland 1992–2002, Journal of the Marine Biological Association of the United Kingdom, 84, 1241-1244, 2004.

Piñeiro, C. and Sainza, M.: Age estimation, growth and maturity of the European hake (*Merluccius merluccius* (Linnaeus, 1758)) from Iberian Atlantic waters, ICES Journal of Marine Science, 60, 1086-1102, 10.1016/s1054-3139(03)00086-9, 2003.

Pita, C., Gamito, S., and Erzini, K.: Feeding habits of the gilthead seabream (*Sparus aurata*) from the Ria Formosa (southern Portugal) as compared to the black seabream (*Spondyliosoma cantharus*) and the annular seabream (*Diplodus annularis*), Journal of Applied Ichthyology, 18, 81-86, 2002.

Plounevez, S. and Champalbert, G.: Feeding behaviour and trophic environment of *Engraulis encrasicolus* (L.) in the Bay of Biscay, Estuarine, Coastal and Shelf Science, 49, 177-191, 1999.

Ponte, D. D. S., Barcelos, L. M. D., Santos, C. S., Medeiros, J., and Barreiros, J. P.: Diet of *Dasyatis pastinaca* and *Myliobatis aquila* (Myliobatiformes) from the Azores, NE Atlantic, Cybium, 40, 209-214, 2016.

Poulet, S. A., Laabir, M., and Chaudron, Y.: Characteristic features of zooplankton in the Bay of Biscay, Scientia Marina, 60, 79-95, 1996.

Preciado, I., Velasco, F., Olaso, I., and Landa, J.: Feeding ecology of black anglerfish *Lophius budegassa*: seasonal, bathymetric and ontogenetic shifts, Journal of the Marine Biological Association of the United Kingdom, 86, 877-884, 2006.

Preciado, I., Cartes, J. E., Serrano, A., Velasco, F., Olaso, I., Sánchez, F., and Frutos, I.: Resource utilization by deep-sea sharks at the Le Danois Bank, Cantabrian Sea, north-east Atlantic Ocean, Journal of fish biology, 75, 1331-1355, 2009.

Preti, A., Kohin, S., Dewar, H., and Ramon, D.: Feeding habits of the bigeye thresher shark (*Alopias superciliosus*) sampled from the California-based drift gillnet fishery, CalCOFI Rep, 49, 202-211, 2008.

Pusineri, C., Chancollon, O., Ringelstein, J., and Ridoux, V.: Feeding niche segregation among the Northeast Atlantic community of oceanic top predators, Marine Ecology Progress Series, 361, 21-34, 10.3354/meps07318, 2008.

Pusineri, C., Vasseur, Y., Hassani, S., Meynier, L., Spitz, J., and Ridoux, V.: Food and feeding ecology of juvenile albacore, *Thunnus alalunga*, off the Bay of Biscay: a case study, ICES Journal of Marine Science, 62, 116-122, 10.1016/j.icesjms.2004.09.004, 2005.

Ragonese, S. and Bianchini, M. L.: Growth, mortality and yield-per-recruit of the poor cod, *Trisopterus minutus capelanus*, from the Strait of Sicily, Naga, the ICLARM Quarterly, 21, 61-70, 1998.

Ramos, J. A., SoM, E., Porteiro, F. M., and Monteiro, L. R.: Prey of Yellow-Legged Gull, Roseate Tern and Common Tern in the Azores, SEABIRD 20, 31, 1998.

Rasero, M., Gonzalez, A., Castro, B. G., and Guerra, A.: Predatory relationships of two sympatric squid, *Todaropsis eblanae* and *Illex coindetii* (Cephalopoda: Ommastrephidae) in Galician waters, Journal of the Marine Biological Association of the United Kingdom, 76, 73-87, 1996.

- Rault, J., Le Bris, H., Robert, M., Pawlowski, L., Denamiel, M., and Kopp, D.: Diets and trophic niches of the main commercial fish species from the Celtic Sea, *Journal of fish biology*, 91, 1449-1474, 2017.
- 2220 Ravard, D., Brind'Amour, A., and Trenkel, V. M.: Evaluating the potential impact of fishing on demersal species in the Bay of Biscay using simulations and survey data, *Fisheries Research*, 157, 86-95, 10.1016/j.fishres.2014.03.007, 2014.
- Regueira, M., Guerra, Á., Fernández-Jardón, C., and González, Á. F.: Diet of the horned octopus *Eledone cirrhosa* in Atlantic Iberian waters: ontogenetic and environmental factors affecting prey ingestion, *Hydrobiologia*, 785, 159-171, 2017.
- 2225 Rice, A.: The food of the Irish Sea herring in 1961 and 1962, *ICES Journal of Marine Science*, 28, 188-200, 1963.
- Rijnsdorp, A. and Vingerhoed, B. v.: Feeding of plaice *Pleuronectes platessa* L. and sole *Solea solea* (L.) in relation to the effects of bottom trawling, *Journal of Sea Research*, 45, 219-229, 2001.
- 2230 Ringelstein, J., Pusineri, C., Hassani, S., Meynier, L., Nicolas, R., and Ridoux, V.: Food and feeding ecology of the striped dolphin, *Stenella coeruleoalba*, in the oceanic waters of the north-east Atlantic, *J. Mar. Biol. Ass. U.K.*, 86, 909-918, 2006.
- Rocha, F., Castro, B. G., Gil, M. S., and Guerra, A.: The diets of *Loligo vulgaris* and *L. forbesi* (Cephalopoda: Loliginidae) in northwestern Spanish Atlantic waters, *Sarsia*, 79, 119-126, 1994.
- 2235 Rodríguez-Cabello, C., Velasco, F., and Olaso, I.: Reproductive biology of lesser spotted dogfish *Scyliorhinus canicula* (L., 1758) in the Cantabrian Sea, *SCI MAR*, 62, 187-191, 1998.
- Rodriguez, A.: Régime alimentaire de deux Soleidae, *Solea lascaris* et *Solea impar* de la côte ouest de Bretagne, *Cybiurn* (Paris), 20, 261-277, 1996.
- Rodriguez, A. M.: Alimentación y comportamiento alimentario de los equinodermos, *Lagena*, 29, 23-31, 1972.
- 2240 Ropert-Coudert, Y., Daunt, F., Kato, A., Ryan, P., Lewis, S., Kobayashi, K., Mori, Y., Grémillet, D., and Wanless, S.: Underwater wingbeats extend depth and duration of plunge dives in gannets *Morus bassanus*, 40, 380-387, 10.1111/j.1600-048X.2008.04592.x, 2009.
- Rory, P. W., David, G., Jon, S., Mandy, A. M. K., Stefan, G., Henri, W., Christian, S.-N., Scolaro, J. A., Bost, C.-A., Joachim, P., and Deon, N.: Remote-sensing systems and seabirds: their use, abuse and potential for measuring marine environmental variables, *Marine Ecology Progress Series*, 228, 241-261, 2002.
- 2245 Rosas-Luis, R. and Sánchez, P.: Food and feeding habits of *Alloteuthis media* in the Western Mediterranean Sea, *Marine Biology Research*, 11, 438-442, 2015.
- Rosas-Luis, R., Villanueva, R., and Sánchez, P.: Trophic habits of the Ommastrephid squid *Illex coindetii* and *Todarodes sagittatus* in the northwestern Mediterranean Sea, *Fisheries Research*, 152, 21-28, 2014.
- 2250 Rosland, R. and Giske, J.: A dynamic model for the life history of *Maurollicus muelleri*, a pelagic planktivorous fish, *Fisheries Oceanography*, 6, 19-34, 10.1046/j.1365-2419.1997.00023.x, 1997.
- Røttingen, I. and Røttingen, J.: Swimming speed of spent Norwegian spring spawning herring, Ryan, C., Berrow, S. D., McHugh, B., O'Donnell, C., Trueman, C. N., and O'Connor, I.: Prey preferences of sympatric fin (Balaenoptera physalus) and humpback (Megaptera novaeangliae) whales revealed by stable isotope mixing models, *Marine Mammal Science*, 30, 242-258, 2014.
- 2255 Saldanha, L., Almeida, A. J., Andrade, F., and Guerreiro, J.: Observations on the diet of some slope dwelling fishes of southern Portugal, *Internationale Revue der gesamten Hydrobiologie und Hydrographie*, 80, 217-234, 1995.

- 2260 Santos, J. and Borges, T.: Trophic relationships in deep-water fish communities off Algarve, Portugal, Fisheries Research, 51, 337-341, 2001.
- Santos, M. B., Fernandez, R., López, A., Martínez, J., and Pierce, G.: Variability in the diet of bottlenose dolphin, *Tursiops truncatus*, in Galician waters, north-western Spain, 1990–2005, Journal of the Marine Biological Association of the United Kingdom, 87, 231-241, 2007.
- 2265 Santos, M. B., Pierce, G., Learmonth, J., Reid, R., Sacau, M., Patterson, I., and Ross, H.: Strandings of striped dolphin *Stenella coeruleoalba* in Scottish waters (1992–2003) with notes on the diet of this species, Journal of the Marine Biological Association of the United Kingdom, 88, 1175-1183, 2008.
- Santos, M. B., German, I., Correia, D., Read, F. L., Cedeira, J. M., Caldas, M., López, A., Velasco, F., and Pierce, G. J.: Long-term variation in common dolphin diet in relation to prey abundance, Marine Ecology Progress Series, 481, 249-268, 2013.
- 2270 Serra-Pereira, B., Figueiredo, I., Farias, I., Moura, T., and Gordo, L. S.: Description of dermal denticles from the caudal region of *Raja clavata* and their use for the estimation of age and growth, ICES Journal of Marine Science, 65, 1701-1709, 2008.
- Serrano, A., Sánchez, F., and García-Castrillo, G.: Epibenthic communities of trawlable grounds of the Cantabrian Sea, Scientia Marina, 70, 149-159, 10.3989/scimar.2006.70s1149, 2006.
- 2275 Sever, T., Bayhan, B., Bilge, G., and Taşkavak, E.: Diet composition of *Belone belone* (Linnaeus, 1761) (Pisces: Belonidae) in the Aegean Sea, Journal of Applied Ichthyology, 25, 702-706, 2009.
- Sever, T. M., Bayhan, B., Filiz, H., Taşkavak, E., and Bilge, G.: Diet composition of the five deep sea fish from the Aegean Sea, Su Ürünleri Dergisi, 30, 61-67, 2013.
- 2280 Sherr, E. B. and Sherr, B. F.: Heterotrophic dinoflagellates: a significant component of microzooplankton biomass and major grazers of diatoms in the sea, Marine Ecology Progress Series, 352, 187-197, 2007.
- Signa, G., Cartes, J. E., Solé, M., Serrano, A., and Sánchez, F.: Trophic ecology of the swimming crab *Polybius henslowii* Leach, 1820 in Galician and Cantabrian Seas: Influences of natural variability and the Prestige oil spill, Continental Shelf Research, 28, 2659-2667, 2008.
- 2285 Silva, A., Cabral, H., Azevedo, M., Machado, P., Murta, A., and Silva, M.: Blue whiting (*Micromesistius poutassou*) as a forage fish in Portuguese waters, 127-146, 1997.
- Sion, L., Carlucci, R., Battista, D., Capezzuto, F., and D'Onghia, G.: GROWTH OF LAMPANYCTUS CROCODILUS (RISSO, 1810) IN THE IONIAN SEA, 18, 148-149, 2011.
- Skomal, G. B. and Natanson, L. J.: Age and growth of the blue shark (*Prionace glauca*) in the North Atlantic Ocean, Fishery Bulletin, 101, 627-639, 2003.
- 2290 Skóra, M., Sapota, M., Skóra, K., and Pawelec, A.: Diet of the twaite shad *Alosa fallax* (Lacépède, 1803)(Clupeidae) in the Gulf of Gdansk, the Baltic Sea, Oceanological and Hydrobiological Studies, 41, 24-32, 2012.
- Solá, A.: Seasonal occurrence of pelagic fish eggs and larvae in the Cantabrian Sea (VIIIc) and Galicia (IXa) from 1987 to 1989, ICES CM 1990/H, 1990.
- 2295 Sorbe, J. C. and Elizalde, M.: Temporal changes in the structure of a slope suprabenthic community from the Bay of Biscay (NE Atlantic Ocean), Deep Sea Research Part II: Topical Studies in Oceanography, 106, 179-191, 10.1016/j.dsr2.2013.09.041, 2014.
- Spitz, J., Rousseau, Y., and Ridoux, V.: Diet overlap between harbour porpoise and bottlenose dolphin: An argument in favour of interference competition for food?, Estuarine, Coastal and Shelf Science, 70, 259-270, 10.1016/j.ecss.2006.04.020, 2006.
- 2300

- Spitz, J., Chouvelon, T., Cardinaud, M., Kostecki, C., and Lorance, P.: Prey preferences of adult seabass *Dicentrarchus labrax* in the northeastern Atlantic: implications for bycatch of common dolphin *Delphinus delphis*, *ICES Journal of Marine Science*, 70, 452-461, 2013.
- 2305 Spitz, J., Richard, E., Meynier, L., Pusineri, C., and Ridoux, V.: Dietary plasticity of the oceanic striped dolphin, *Stenella coeruleoalba*, in the neritic waters of the Bay of Biscay, *Journal of Sea Research*, 55, 309-320, 10.1016/j.seares.2006.02.001, 2006.
- Spitz, J., Cherel, Y., Bertin, S., Kiszka, J., Dewez, A., and Ridoux, V.: Prey preferences among the community of deep-diving odontocetes from the Bay of Biscay, Northeast Atlantic, *Deep Sea Research Part I: Oceanographic Research Papers*, 58, 273-282, 10.1016/j.dsr.2010.12.009, 2011.
- 2310 Teixeira, C. M., Pinheiro, A., and Cabral, H. N.: Feeding ecology, growth and sexual cycle of the sand sole, *Solea lascaris*, along the Portuguese coast, *Journal of the Marine Biological Association of the United Kingdom*, 89, 621-627, 2009.
- The Wildlife Trusts: <https://www.wildlifetrusts.org/>, last access: 2018.
- 2315 Then, A. Y., Hoenig, J. M., Hall, N. G., Hewitt, D. A., and Jardim, H. e. E.: Evaluating the predictive performance of empirical estimators of natural mortality rate using information on over 200 fish species, *ICES Journal of Marine Science*, 72, 82-92, 2015.
- Torgersen, T. and Kaartvedt, S.: In situ swimming behaviour of individual mesopelagic fish studied by split-beam echo target tracking, *ICES Journal of Marine Science*, 58, 346-354, 10.1006/jmsc.2000.1016, 2001.
- 2320 Uriarte, A. and Lucio, P.: Migration of adult mackerel along the Atlantic European shelf edge from a tagging experiment in the south of the Bay of Biscay in 1994, *Fisheries Research*, 50, 129-139, 2001.
- Valls Mir, M.: *Trophic Ecology in Marine Ecosystems from the Balearic Sea (Western Mediterranean)*, Universitat de les Illes Balears, 2017.
- 2325 Varela, J. L., Rodríguez-Marín, E., Ruiz, M., and Medina, A.: Feeding habits of young bluefin tuna (*Thunnus thynnus*) in the Bay of Biscay inferred from stomach-content and stable-isotope analyses, *Marine Biodiversity Records*, 7, 2014.
- Varela, J. L., Sorell, J. M., Laiz-Carrión, R., Baro, I., Uriarte, A., Macías, D., and Medina, A.: Stomach content and stable isotope analyses reveal resource partitioning between juvenile bluefin tuna and Atlantic bonito in Alboran (SW Mediterranean), *Fisheries Research*, 215, 97-105, 2019.
- 2330 Velasco, E., Jimenez-Tenorio, N., Del Arbol, J., Bruzón, M. A., Baro, J., and Sobrino, I.: Age, growth and reproduction of the axillary seabream, *Pagellus acarne*, in the Atlantic and Mediterranean waters off southern Spain, *Journal of the Marine Biological Association of the United Kingdom*, 91, 1243-1253, 10.1017/s0025315410000305, 2011.
- 2335 Velasco, F. and Olaso, I.: European hake *Merluccius merluccius* (L., 1758) feeding in the Cantabrian Sea: seasonal, bathymetric and length variations, *Fisheries Research*, 38, 33-44, 1998.
- Villamor, B., Abaunza, P., Lucio, P., and Porteiro, C.: Distribution and age structure of mackerel (*Scomber scombrus*, L.) and horse mackerel (*Trachurus trachurus*, L.) in the northern coast of Spain, 1989-1994, *Scientia Marina*, 61, 1997.
- 2340 Vinagre, C., Silva, A., Lara, M., and Cabral, H.: Diet and niche overlap of southern populations of brill *Scophthalmus rhombus* and turbot *Scophthalmus maximus*, *Journal of fish biology*, 79, 1383-1391, 2011.

White, D. B., Wyanski, D. M., and Sedberry, G. R.: Age, growth, and reproductive biology of the blackbelly rosefish from the Carolinas, U.S.A, Journal of fish biology, 53, 1274-1291, <https://doi.org/10.1111/j.1095-8649.1998.tb00248.x>, 1998.

2345 White, E., Minto, C., Nolan, C. P., King, E., Mullins, E., and Clarke, M.: First estimates of age, growth, and maturity of boarfish (*Capros aper*): a species newly exploited in the Northeast Atlantic, ICES Journal of Marine Science, 68, 61-66, 10.1093/icesjms/fsq150, 2010.

Wikipedia: <https://en.wikipedia.org/wiki/>, last access: 2018.

2350 Winger, P., He, P., and Walsh, S.: Swimming endurance of American plaice (*Hippoglossoides platessoides*) and its role in fish capture, ICES Journal of Marine Science, 56, 252-265, 1999.

Winn, H. E. and Olla, B. L.: Behavior of marine animals: current perspectives in research, Springer Science & Business Media 2012.
