# Supplementary material for: Parameterization and tuning of the Bay of Biscay Atlantis model v1
Source: Copernicus journal article supplement (doi:10.5194/egusphere-2023-1368), 2023-09-22
Supplement: Supplementary file [file egusphere-2023-1368-RC1-supplement.pdf]

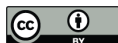

## Parameterization and tuning of the Bay of Biscay Atlantis model v1

Ane Lopez de Gamiz-Zearra<sup>1</sup>, Cecilie Hansen<sup>2</sup>, Xavier Corrales<sup>1</sup>, Iñaki Quincoces<sup>1</sup>, Izaskun Preciado<sup>3</sup>, Eider Andonegi<sup>1</sup>

<sup>1</sup>AZTI, Marine Research Division, Basque Research and Technology Alliance (BRTA), Txatxarramendi  
5 Ugarte a z/g, 48395, Sukarrieta, Spain

<sup>2</sup>Institute of Marine Research, Nordnesgaten 33, 5005, Bergen, Norway

<sup>3</sup>Instituto Español de Oceanografía, Centro Oceanográfico de Santander, Promontorio San Martín s/n,  
39004, Santander, Spain

*Correspondence to:* A. Lopez de Gamiz-Zearra (alopez@azti.es)

### 10 Abstract

This paper describes the parameterization and calibration of an end-to-end Atlantis model for the Bay of Biscay, characterising spatially the structure and functioning of the ecosystem. The Bay of Biscay is considered rich in terms of ecological diversity and different oceanographic events such as coastal upwelling, coastal run-off and river plumes, and seasonal currents, take place in the area. These features,  
15 in addition to the different pressures caused by human activities and management criteria, demand for concurrent modelling of all the characteristics of the Bay of Biscay ecosystem in order to improve our understanding of the system and its functioning. The modelled area is 145 970 km<sup>2</sup> and was divided into 36 spatial polygons, each with multiple vertical layers. The model was composed by 54 functional groups, ranging from primary producers to top predators. Our results highlighted the importance of lower trophic  
20 levels to the pelagic system and how the trophic interactions among phytoplankton and zooplankton groups impact the structure of the ecosystem. The results also demonstrate the importance of having accurate and precise data for biological processes and showed the need of further study in the age-specific data such as biomass and weight distribution per age and diet interactions between juvenile and adult fish stages. Overall, the Bay of Biscay Atlantis model has been shown to be a tool that has the potential to  
25 improve our understanding of the spatial functioning of the Bay of Biscay ecosystem that will help establishing management measures of human activities.

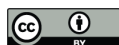

## 1. Introduction

Today, there is no ocean free from human influence (Halpern et al., 2008). Over more than a century the use of marine and coastal areas has changed from mainly fishing activities to a complexity of economic, ecological, and sociocultural activities (Ramos et al., 2015; Worm and Branch, 2012). In addition, marine ecosystems are currently being heavily impacted by climate change (Baudron et al., 2020; Perry et al., 2005).

As in other coastal systems, the Bay of Biscay (hereafter BoB), a gulf of the Atlantic Ocean located between the western coast of France and the northern coast of Spain, has been and still is subjected to multiple pressures caused by different human activities such as fishing, aquaculture, farming, industrial activities (paper milling, petroleum refining and iron and steel working), maritime transport, shipping, land-based industry, tourism, new urbanization of coastal areas, recreational uses of beaches and shores, and other pressures such as climate change and invasive species (Borja et al., 2019; Lorance et al., 2010). The BoB is considered a complex system due to the different oceanographic processes happening in the area such as coastal upwelling, coastal run-off and river plumes, seasonal currents, eddies, internal waves and tidal fronts, and variable waves and storms due to the latitudinal location (Borja et al., 2019; OSPAR, 2000). In addition, while the Spanish continental shelf is narrow and includes different submarine canyons, e.g., Cap Breton, the French continental shelf is wide. The BoB corresponds to a subtropical/boreal transition zone with a high biological diversity reflected in the ecological richness of the area (OSPAR, 2000). The area is rich in terms of phytoplankton and zooplankton taxonomic groups and species, and it contains a high microphytobenthos biodiversity (OSPAR, 2000). Likewise, the topographical complexity and the wide range of substrates in a narrow continental shelf give rise to highly diverse benthic communities (Serrano et al., 2006). A wide depth distribution of fish species can be found in the region from 0 m to more than 800 m, some of them with commercial relevance for the surrounding countries (Borja et al., 2019; ICES, 2019a). In addition, it hosts species of great interest for conservation such as cetaceans and seabirds (García-Barón et al., 2019a; García-Barón et al., 2019b). The hydrodynamic events, ecological features and the many pressures that are affecting this marine ecosystem together with the spatial management (e.g., closed areas/seasons) and management criteria (e.g., shared stocks) in the area (Borja et al., 2019; Valdés and Lavín, 2002) underline a need to make progress towards the implementation of the Ecosystem Approach



55 (EA), accounting for the spatial planning of the different activities and analysing the impacts of the variety of pressures on the ecosystem, from species to communities and ecosystem properties as a whole. EA requires an adaptive management (AM) approach that incorporates scientific methods for planning, implementing and evaluating management strategies (Schreiber et al., 2004).

Within this context, end-to-end marine ecosystem models can play an important role as they allow to  
60 simulate the entire ecosystem, from oceanography to food web structure and functioning along with multiple anthropogenic pressures (Kaplan and Marshall, 2016). Atlantis is considered the best operating model currently available to assess the functioning of the entire ecosystem (Plagányi, 2007). The first Atlantis model was developed in South-eastern Australia by Fulton et al. (2007) and it was used for management strategy evaluation (MSE). The Atlantis framework is now implemented worldwide to  
65 investigate different management strategies (e.g., Ainsworth et al. (2012); Fulton et al. (2014); Hansen et al. (2019a)), climate change effects (e.g., Bossier et al. (2021); Fay et al. (2017); Ortega-Cisneros et al. (2018)), oil spill (e.g., Ainsworth et al. (2018); Morzaria-Luna et al. (2018)) or agricultural practices and land-use, urbanisation, climate and freshwater extraction and additional habitat disturbance or recovery (Condie et al., 2012), and interaction effects of fishing, ocean warming and ocean acidification (Griffith  
70 et al., 2012).

The BoB ecosystem structure and functioning has already been studied using a series of Ecopath with Ecosim (EwE) approaches, some representing subareas (Lassalle et al., 2011; López López, 2017; Moullec et al., 2017; Sánchez and Olaso, 2004) whereas Corrales et al. (2022) developed an EwE for the whole BoB area. These models, however, did not study the area in three dim<sup>en</sup>sions. This paper presents  
75 the first spatially resolved three-dimensional model development (parameterization and calibration) for the whole BoB area using the Atlantis framework. The main objective of the study was to obtain a calibrated/reasonable Atlantis model for the BoB ecosystem that helps us gain knowledge on the structure and functioning of the ecosystem in three dimensions to inform ecosystem-based fisheries management measures.



## 80 2. Materials and methods

### 2.1. Study area and time period

This study encompasses the BoB ecosystem, from Ribadeo (Galicia, Spain) to Raz (France), covering ICES divisions 8a<sub>b</sub> and 8c (Fig. 1). The model comprises the French continental shelf and the Cantabrian Sea, from 0 m up to 4000 m depth, covering an area of 145 970 km<sup>2</sup>. The BoB Atlantis model was  
85 initialized on January 1st, 2000, and the initial state represents the mean ecosystem functioning from 2000 to 2003, the period where accurate and accessible data is available, especially catch data. The model was projected forward for 40 years on a 24-hour time step.

The bathymetric limits of the model were determined using ecological and fishery characteristics. Coastal waters were included as they serve as important feeding and breeding grounds for many species,  
90 and they are the primary fishing grounds for coastal artisanal fleet and recreational fishermen; the limit of 4000 m is assumed to cover the Cap Breton Canyon, where the 1000 m isobath is found only 3 km from the coast (Lavin et al., 2006).

95

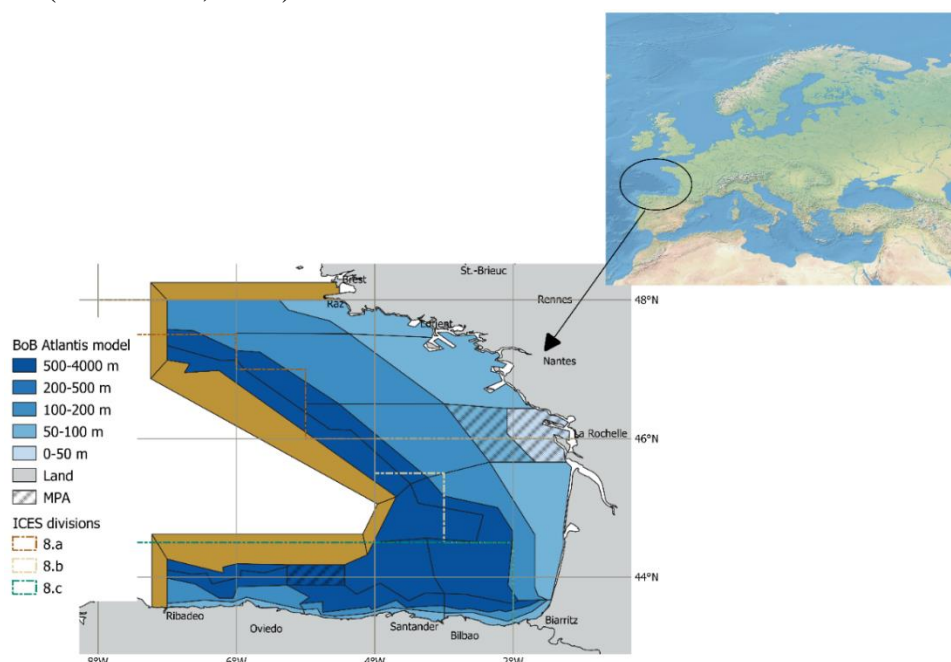

100

105

**Figure 1.** Overview of the BoB Atlantis model polygons (blue) and boundary polygons (yellow) covering the model domain. The depth layers are categorized using different blue colours: dark blue corresponds to the deepest layer (500-4000 m) while light blue corresponds to the shallowest layer (0-50 m). Land is coloured grey and MPAs are shaded. ICES divisions are differentiated in brown (8a), yellow (8b) and green (8c).



## 2.2. The Atlantis modelling framework

Atlantis is a three-dimensional, species-based and age-structured biophysical modelling framework intended for use in MSE – a simulation technique based on modelling each part of the AM cycle – so it includes all its components: biophysical system, human uses of the system, socioeconomic drivers of human uses and the three major components of an AM strategy (monitoring, assessment and management decision process) (Fulton et al., 2011). All of these components are simulated in sub-models and then integrated, making it possible to move towards an integrated and qualitative assessment of the ecosystem (Audzijonyte et al., 2019; Fulton et al., 2011).

At the core of Atlantis is the biophysical sub-model, a deterministic (differential equation) and spatially resolved three-dimensional model, ~~which is based on a map made up of the~~ user defined irregular polygons and depth layers (Audzijonyte et al., 2017; Fulton et al., 2011). This polygon representation facilitates tracking the flows of nutrients (usually nitrogen and silica, although others are possible) through the main biological groups in the studied ecosystem (Fulton et al., 2011; Link et al., 2010). Representation of the physical environment also occurs within the polygons that correspond to the simulated marine system's main geographical and bioregional features coupled with an oceanographic transport model. The primary ecological processes considered are growth, consumption, production, waste production, migration, recruitment, habitat dependency and mortality. These processes are represented as either biomass pools, age-structured biomass pools or age-structured groups (Audzijonyte et al., 2017); lower trophic level invertebrate groups are generally treated as biomass pools, while a user-defined age- and stock-structured formulation is used to describe vertebrate and some high trophic level invertebrate groups (Link et al., 2010; Pethybridge et al., 2019). In biomass pools the processes are modelled through biomass turnover, whilst in age-structured groups, the state variables are numbers-at-age and weight-at-age (tracked as reserve and structural nitrogen), which can be converted to biomass by  $(SN + RN) * Nums$ , where  $SN$  and  $RN$  are the structural and reserve weight, and  $Nums$  is the numbers in an age group (Audzijonyte et al., 2017).



## 2.3. The Bay of Biscay Atlantis model

### 2.3.1. Code version

The Atlantis source code is hosted in a subversion (SVN) repository (Audzijonyte et al., 2017). The  
135 BoB Atlantis model was built using code version 6540 

### 2.3.2. Grid design

The spatial domain of the BoB Atlantis model was divided into 36 irregular polygons. Non-dynamic  
polygons (Fig. 1, marked in yellow) represented borders of the model domain (boundary polygons). These  
polygons are necessary to allow for exchange of water nutrients to and from dynamic model domain. All  
140 dynamic polygons (Fig. 1, marked in blue) were divided into depth layers, containing up to five layers  
defined by the following isobaths: 0- 50 m, 50-100 m, 100-200 m, 200-500 m and > 500 m, up to 4000 m  
depth. The number of layers is subjected to the geography of the polygon, depending on the mean depth  
of the polygon. Each polygon also contains a single 1 m thick sediment layer.

The spatial structure was based on: i) information on the boundaries of the ICES divisions 8ab and  
145 8c (ICES); ii) bathymetry and species distribution collected from the BIOMAN surveys (pers. comm.  
Maria Santos); iii) MPAs gathered from the European Environment Agency (EEA); and iv) seabed  
substrate types map of the European sea areas obtained from the European Marine Observation and Data  
Network (EMODnet) (Vasquez et al., 2021).

### 2.3.3. Oceanographic forcing

150 Atlantis does not calculate volume fluxes ( $\text{m}^3 \text{s}^{-1}$ ) itself but uses hydrodynamic data from  
oceanographic models to specify these fluxes across polygon faces. It needs input at ~~daily or 12-hour~~  
resolution, which makes it challenging to use observations, as these usually have gaps in time and/or  
space. Temperature and salinity conditions can be calculated by the model using simple routines or  
calculated using data from oceanographic models (Audzijonyte et al., 2017).

155 For the BoB Atlantis model, volume fluxes between polygons for all depth layers were computed  
using E.U. Copernicus Marine Service Information for the Iberia-Biscay-Ireland (IBI) area (Aznar et al.,  
2016). The data was allocated to each Atlantis polygon boundary and interpolated to daily data using the



software R version 4.0.4 (R Core Team, 2021). For consistency with the fluxes, temperature and salinity were also forced using E.U. Copernicus Marine Service Information for the Iberia-Biscay-Ireland (IBI) area (Aznar et al., 2016). The information used corresponded to the simulation of the year 2007 with a daily time step, which was repeated for the whole simulation. This way the influence of environmental factors was neutralized.

### 2.3.4. Functional groups design and biological components

The definition of functional groups was done considering previously developed ecosystem models (López López, 2017; Moullec et al., 2017; Sánchez and Olaso, 2004). Functional groups were defined based on the commercial importance of the species, data availability and ecological features of the species such as diet composition and bathymetric distribution and in line with a recent published EwE model in the BoB (Corrales et al., 2022). In total, the BoB Atlantis model comprises 54 functional groups, including 3 groups of detritus (2 natural detritus and 1 fisheries discards), 2 groups of bacteria, 3 groups of primary producers, 7 groups of pelagic invertebrates, 9 groups of benthic invertebrates, 9 groups of pelagic fishes, 13 groups of benthic fishes, 1 group of pelagic elasmobranchs, 3 groups of benthic elasmobranchs, 2 groups of marine mammals and 2 groups of seabirds (Table 1; Table S1; Fig. 2). Main commercially targeted species and/or species with an important ecological role were parameterised as separate components (marked with \* in Table 1).

**Table 1.** Description of functional groups included in the Bay of Biscay Atlantis model. Commercially relevant functional groups and key functional groups are marked with \*.

| Code | Group                               | Code | Group                       |
|------|-------------------------------------|------|-----------------------------|
| SBD  | Diving and pursuit divers' seabirds | CBE  | Benthic cephalopods         |
| SBS  | Surface feeding seabirds            | CBP  | Squids                      |
| BWH  | Baleen whales                       | NEP  | Norway lobster *            |
| CET  | Toothed cetaceans                   | CRP  | Pelagic crab *              |
| SHB  | Demersal sharks                     | SHR  | Zooplankton feeding shrimps |
| SHP  | Pelagic sharks                      | DFB  | Benthos-feeders decapods    |
| SHD  | Deep water sharks                   | DFD  | Detritus-feeders decapods   |
| SSK  | Skates and rays                     | BIV  | Bivalves                    |
| BFT  | Bluefin tuna *                      | POL  | Polychaetes                 |
| ALB  | Albacore *                          | SB   | Suprabenthos                |
| OPE  | Other large pelagic fishes          | ECH  | Echinoderms                 |
| MAC  | Mackerel *                          | INV  | Other invertebrates         |




---

|     |                            |    |                               |
|-----|----------------------------|----|-------------------------------|
| HOM | Horse mackerel *           | ZG | Gelatinous zooplankton        |
| PIL | Sardine *                  | ZL | Macrozooplankton (> 2000 µm)  |
| ANE | Anchovy *                  | ZM | Mesozooplankton (200-2000 µm) |
| OPL | Other planktivorous fishes | ZS | Microzooplankton (< 200 µm)   |
| FMP | Mesopelagic fishes         | PP | Benthic primary producers     |
| ANF | Anglerfish *               | PL | Large phytoplankton (> 20 µm) |
| BSS | Seabass *                  | PS | Small phytoplankton (< 20µm)  |
| WHB | Blue whiting *             | PB | Pelagic bacteria              |
| HKE | Hake *                     | BB | Sediment bacteria             |
| COD | Cods                       | DL | Labile detritus               |
| MEG | Megrim *                   | DR | Refractory detritus           |
| SOL | Common sole *              | DC | Carrion                       |
| FFL | Flatfishes                 |    |                               |
| MUL | Mullets *                  |    |                               |
| FDL | Large demersal fishes      |    |                               |
| FDM | Medium demersal fishes     |    |                               |
| FDS | Small demersal fishes      |    |                               |
| FSD | Deep sea fishes            |    |                               |

---

For each vertebrate group in Atlantis, the number of cohorts and the number of calendar years each of these represent are flexible (Audzijonyte et al., 2017). In the BoB Atlantis model, age-structured functional groups with a lifespan of 10 or more years, had 10 age-classes representing from 1 up to 9 years. Age-structured functional groups with a shorter lifespan than 10 years included a similar number of cohorts to their lifespan. Additionally, all the age-structured functional groups were split up into adult and juvenile stages, where information on fraction of mature for each age class was provided to the model. In Atlantis, when reaching maturity, the individuals are allowed to switch feeding habitats, distribution and migration routes (Audzijonyte et al., 2017). However, the sexual maturation is not assumed to occur at the same time as the ontogenetic shift in habitat and prey usage, but is expressed by the spawning ogive (Audzijonyte et al., 2017). The larval period is not explicitly modelled; in age-structured groups, after a defined larval time, nitrogen created as spawn is temporally removed from the model and returned as recruits (Audzijonyte et al., 2017). In the BoB Atlantis model, a modified Beverton-Holt spawn and species biomass dependent recruitment relationship was implemented for the recruitment of fish-species, and a constant recruitment for seabirds, marine mammals and elasmobranchs. The detailed explanation of the parameters of each of the age-structured functional groups used to initialize the BoB Atlantis model



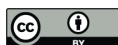

and the final parameter values after calibration process are included in Section S1 and Section S2, respectively.

195 In the BoB Atlantis model, pelagic and benthic invertebrate groups were defined as biomass pools. For these groups, the biomass in tonnes was converted to milligram Nitrogen using an assumed Redfield ratio of 5.7 (Redfield, 1958) between dry weight and nitrogen weight. In Atlantis, in contrast to age-structured groups, reproduction in biomass pools is not explicitly modelled (Audzijonyte et al., 2017). The detailed explanation of the parameters of each of the biomass pool groups used to initialize the BoB  
200 Atlantis model and the final parameters values after the calibration process are included in Section S1 and Section S2, respectively.

In Atlantis, natural mortality accounts for mortality factors explicitly ~~not~~ modelled, such as mortality due to age or illness (Audzijonyte et al., 2017). Linear mortality terms should ideally be as low as possible, if not zero, whereas quadratic mortality terms at lower trophic levels should be low or zero, and of moderate size for the top predators (Audzijonyte et al., 2017). ~~Due to the need of low levels of natural mortality, the mortality values found in the literature were not feasible for the model, also because they often include predation mortality.~~ Therefore, the natural mortality parameter values used in the BoB Atlantis model were based upon tuning. Additional term of mortality connected to starvation of 0.0001 per day was used (Fulton et al., 2007; Hansen et al., 2016), but as mortality due to oxygen limitation and  
210 acidification were rather unlikely, these parameter values were not used.

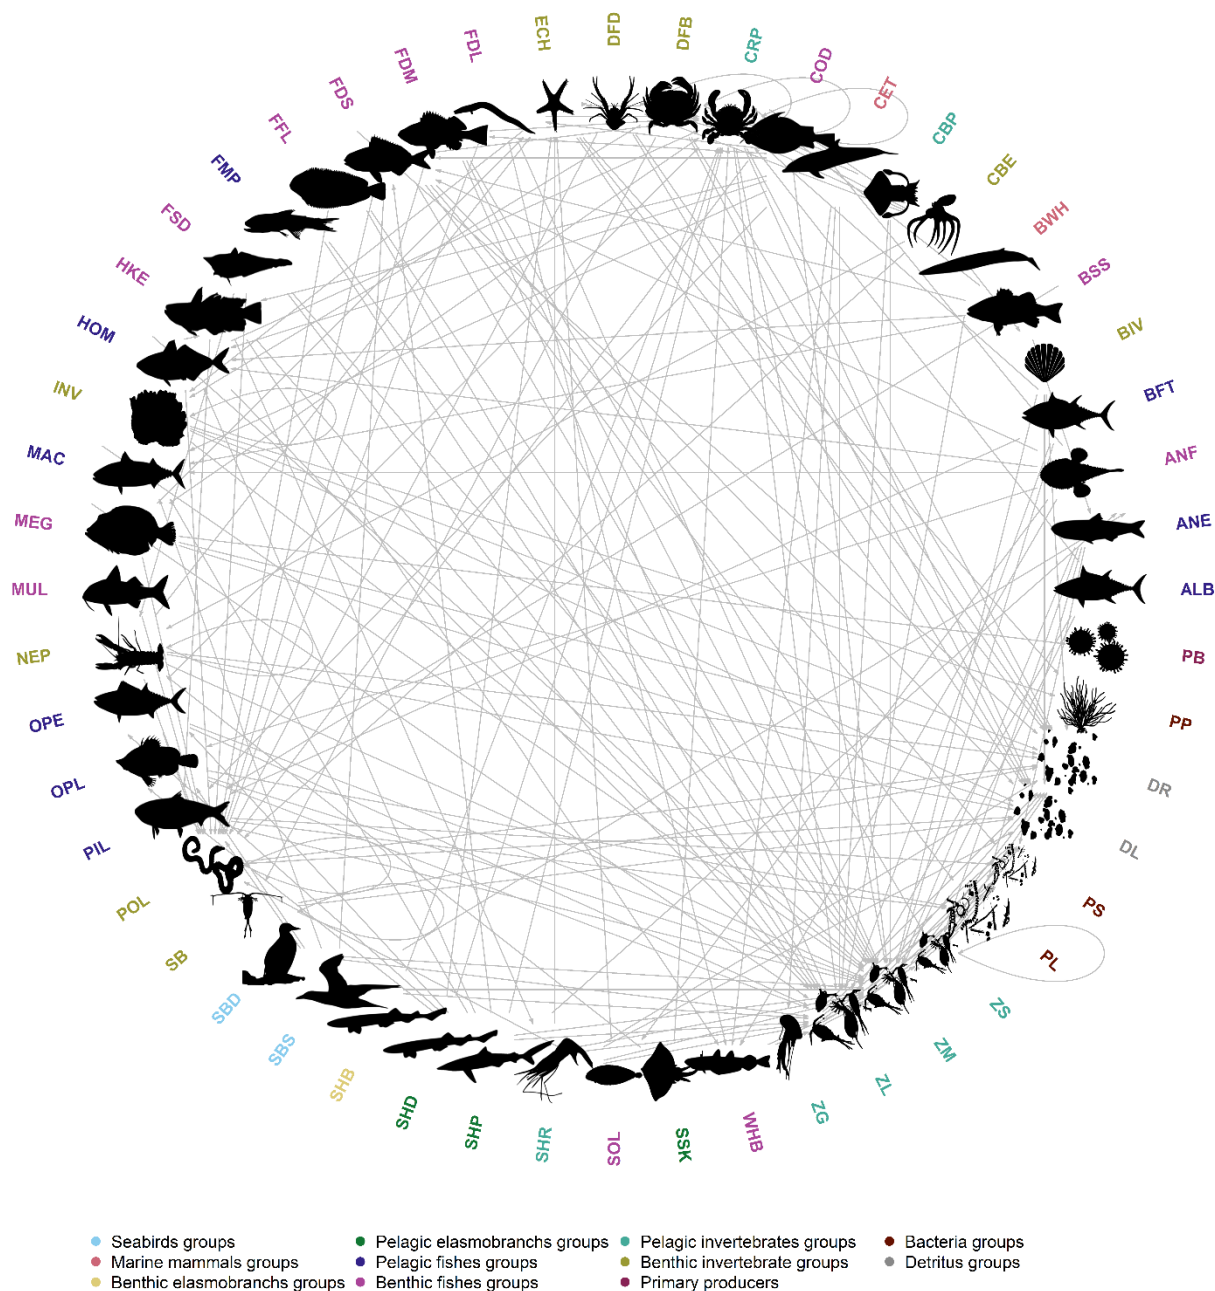

**Figure 2.** Schematic representation of the Bay of Biscay Atlantis model representing the period 2000–2003 (the abbreviations of the functional groups are listed in Table 1). Black figures and grey arrows represent the species included in the model and their interactions with other species. If the functional group included in the model is composed of several species (Section S1), the species with which the functional group has been parameterized is used in the figure.

215



### 2.3.5. Inputs/Observations

Biomass estimates were obtained using data from DEMERSALES and EVHOE bottom trawl surveys from the Spanish Institute of Oceanography (IEO) and the Institut Français de Recherche pour l'Exploitation de la Mer (IFREMER) (ICES, 2017), PELACUS and PELGAS acoustic surveys from IEO and IFREMER (Masse et al., 2018), TRIENAL acoustic survey from IEO and AZTI (ICES, 2019b), visual surveys (Laran et al., 2017; Pettex et al., 2017), stock assessments, EwE model (Corrales et al., 2022) and other information found in the literature (Table 2; Section S1).

**Table 2.** Description of source of information used in the calculation of biomass estimates for functional groups included in the Bay of Biscay Atlantis model.

| Group                                                                                         | Source                               |
|-----------------------------------------------------------------------------------------------|--------------------------------------|
| Seabirds groups                                                                               | Visual survey (Pettex et al., 2017)  |
| Marine mammals groups                                                                         | Visual survey (Laran et al., 2017)   |
| Benthic elasmobranch groups                                                                   | DEMERSALES and EVHOE surveys         |
| Pelagic elasmobranchs groups                                                                  | EwE model                            |
| Pelagic fishes groups                                                                         | PELACUS and PELGAS surveys           |
| Tuna fish groups                                                                              | Stock assessment (ICCAT, 2016, 2017) |
| Other large pelagic fishes, mesopelagic fishes                                                | EwE model                            |
| Mackerel                                                                                      | TRIENAL survey                       |
| Anchovy                                                                                       | Stock assessment (ICES, 2019c)       |
| Benthic fishes groups                                                                         | DEMERSALES and EVHOE surveys         |
| Pelagic and benthic invertebrate groups                                                       | DEMERSALES and EVHOE surveys         |
| Bivalves, polychaetes, suprabenthos, echinoderms, other invertebrates, gelatinous zooplankton | Literature                           |
| Zooplankton                                                                                   | EwE model                            |
| Behic primary producers                                                                       | Literature                           |
| Phytoplankton                                                                                 | Copernicus (Aznar et al., 2016)      |
| Bacteria                                                                                      | ICES Report (ICES, 2012)             |
| Detritus groups, carrion                                                                      | EwE model                            |

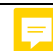

225

The simplest form of spatial distribution for vertebrates was used in the BoB Atlantis model, called “prescribed movement” (Audzijonyte et al., 2017). Using this option, the spatial distributions were predefined by interpolating the proportion of biomass in each polygon for each quarter of the year. This way, the model will distribute vertebrate biomass between the polygons the same way each year and the horizontal movement will not be mostly or entirely overwritten by the movement and distribution due to food availability. The proportion of biomass for each polygons was defined using information collected



from: i) Pettex et al. (2017) for seabirds groups; ii) Laran et al. (2017) for marine mammals groups; iii) egg distribution from the BIOMAN survey for the year 2018 for sardine (*Sardina pilchardus*) and anchovy (*Engraulis encrasicolus*) (pers. comm. Maria Santos); and iv) DEMERSALES and EVHOE  
235 bottom trawl survey (ICES, 2017) for the remaining functional groups except for pelagic sharks and tuna fish groups. For these groups (pelagic sharks, bluefin tuna (*Thunnus thynnus*) and albacore (*Thunnus alalunga*)) it was not possible to differentiate the horizontal distribution per life stage (juvenile/adult) or season due to poor information available, and, therefore, homogeneous horizontal distribution was assumed for both stages and seasons (Section S3, Fig. S1). Regarding the vertical distribution, only  
240 anchovy daytime, night-time, adult and juvenile vertical distributions were found (Boyra et al., 2013).

The diet information was obtained collecting information of stomach content from IEO's database together with trophic information gathered from published and unpublished studies on stomach content analysis, giving preference to local or surrounding areas (the detailed calibrated input diet matrix can be found in Section S4, Table S7). Remarkably, the described dietary preferences of 35 species of fish from  
245 the DEMERSALES trawl surveys for the 2000-2003 period were used (pers. comm. Izaskun Preciado).

#### 2.4. Calibration process of the Bay of Biscay Atlantis model

The calibration process of the BoB Atlantis model was performed stepwise and bottom up, starting with the lower trophic level groups up to top predators, through two different stages: i) calibration of a simplified NPZD (Nutrient, Phytoplankton, Zooplankton and Detrital matter) model, meaning only the  
250 nutrients, organic matter and planktonic functional groups were active; and ii) calibration of the full system model, meaning all the functional groups were active. In the calibration process of the full system model, the spatial structure of each of the functional groups was analysed. However, the validation was only done for anchovy and sardine. For these species, we compared the spatial distribution during spring derived from Atlantis and the egg distribution from the BIOMAN survey for the period 2019-2020 in  
255 May.

In Atlantis, there are typically three phases of calibration: i) unfished system; ii) constant fishing; and iii) historical fishing and environmental drivers (Audzijonyte et al., 2017; Pethybridge et al., 2019). In the absence of fishing, the main goal of the calibration process was to produce stable unfished levels of

biomass through time under stable environmental conditions and reasonable individuals' weight-at-age.  
260 That is, keep all groups from going extinct and obtain stable biomass and individuals' weight-at-age that  
are not oscillating more than  $\pm 20\text{-}50\%$  from their initial values. Similar to other ecosystem models with  
a large number of parameters, many parameters in Atlantis (e.g., oceanographic and physical parameters  
such as water fluxes, resuspension, point-source scaling, eddy strengths) do not need changing after the  
model development (Pethybridge et al., 2019). Other parameters, however, are crucial in terms of model  
265 sensitivity such as growth and consumption, recruitment and mortality (Audzijonyte et al., 2017;  
Pethybridge et al., 2019). In this study we focused on growth and mortality parameters. The equations for  
these parameters are given below, and the parameters that have been changed during the calibration  
process are highlighted in bold.

Growth of primary producers ( $G_{pp}$ ) is represented by the equation (Audzijonyte et al., 2017):

$$G_{pp} = B_{pp} * \mathbf{mum} * \delta_{light} * \delta_{nutrient} * \delta_{space} * \delta_{eddy} * \mathbf{pHscalar} \quad (1)$$

270 where  $B_{pp}$  is the biomass of the primary produces (tonnes),  $\mathbf{mum}$  is the maximum growth rate (mgN per  
day), and  $\delta_{light}$ ,  $\delta_{nutrient}$ ,  $\delta_{space}$ ,  $\delta_{eddy}$  and  $\mathbf{pHscalar}$  are light, nutrient, space, eddy and  $\mathbf{pH}$  scalar limiting  
factors.  $\mathbf{pHscalar}$  is 1 in the BoB Atlantis model.

Growth in biomass-pool consumers is determined by the consumed food or grazing term ( $Gr$ ) and  
assimilation efficiency, whereas the growth in age-structured consumers is determined by the consumed  
275 food or grazing term ( $Gr$ ), assimilation efficiency and optional maintenance or respiration costs ( $Rs$ ). The  
grazing term ( $Gr$ ) is the amount of biomass of a specific prey consumed by a consumer, modelled for  
biomass-pool consumers and age-structured consumer with the equation (Audzijonyte et al., 2017):

$$Gr_{prey} = \frac{B * C * B_{prey}^*}{1 + \frac{C * \sum_i (E_i * B_{prey,i}^*)}{\mathbf{mum}}} \quad (2)$$

where  $B$  is the feeding biomass of predator  $C$  (mgN per  $m^3$ ),  $C$  is the consumption rate ( $m^3$  mgN per  
day),  $\mathbf{mum}$  is the maximum growth rate (mgN per day), and  $B_{prey}^*$  is the available biomass of  $prey$  after  
280 the overlap, habitat and size refuge was taken into account.



The mortality components includes predation, natural mortality divided into linear and quadratic mortality (density dependent mortality), and additional mortality due to starvation, temperature, pH or other factors (Audzijonyte et al., 2019). Predation is determined by the user-defined **predator-prey matrix**, which sets the availability of each prey biomass to a particular predator. For age-structured groups, four values are given for each predator-prey combination: juvenile-juvenile, juvenile-adult, adult-juvenile and adult-adult (Audzijonyte et al., 2017).

Natural mortality of primary producer is represented by (Audzijonyte et al., 2017):

$$M_{PP} = \left( \left( \frac{KLYS \cdot B_{PP}}{\delta_{nutrient} + 0.1} \right) + mL \cdot B_{PP} (mL \cdot B_{PP} + mA \cdot B_{PP}) \right) \quad (3)$$

where  $KLYS$  ( $\text{day}^{-1}$ ) is the lysis rate,  $B_{pp}$  is the biomass,  $\delta_{nutrient}$  is the nutrient limiting factor,  $mL$  ( $\text{day}^{-1}$ ) is the linear mortality rate and  $mA$  is the optional acidification mortality.

Natural mortality of a consumer is represented by (Audzijonyte et al., 2017):

$$M_{xx} = ((mL + mQ \cdot xx + mSt + (1 - \delta_{O_2}) \cdot mO + mE) \cdot xx) \cdot mortsc \quad (4)$$

where  $mL$  is linear mortality rate ( $\text{day}^{-1}$ ),  $mQ$  is quadratic mortality rate ( $\text{day}^{-1}$ ),  $xx$  is the biomass if consumer is biomass-pool or number if is age-structured group,  $mSt$  is starvation mortality rate ( $\text{day}^{-1}$ ) for age-structured group only,  $\delta_{O_2}$  is the oxygen limiting factor,  $mO$  is oxygen mortality rate ( $\text{day}^{-1}$ ) for biomass-pool group only,  $mE$  is the optional extra mortality for age-structured group only and  $mortsc$  is the optional external mortality scalar.  $\delta_{O_2}$  in the BoB Atlantis model.

### 2.4.1. Simulations

Considering the elements that comprises the growth of planktonic groups (Eq. (1)), the NPZD calibration process was done starting by: i) nutrient limitation mechanism; ii) primary producers; and iii) zooplankton groups (Simulations 01-14, Section S5, Table S8).

At each step of the full system calibration process, one group at a time was calibrated, starting from pelagic and benthic invertebrate groups up to seabirds and marine mammals (Simulations 15-134, Section



S5, Table S8). In each simulation of each step of the full system calibration process, only one parameter was changed.

### 3. Results

#### 305 3.1. Biomass trends

The main objective of the calibration of the BoB Atlantis model was to keep all groups from going extinct and obtain a stable system with all components within reasonable limits. For the BoB Atlantis model, “reasonable limits” means biomass and individuals’ weight-at-age staying within  $\pm 50\%$  from their initial values (Section S5, Fig. S2 and Fig. S3). A majority (73%) of the groups reach a balanced  
310 equilibrium after 15 years into the simulation. This period is called “spin-up” period (Pethybridge et al., 2019). Pelagic sharks, mackerels, horse mackerels, other planktivorous fishes, common sole and medium demersal fishes had upward or downward trends after this period but remained within  $\pm 50\%$  from their initial biomass (Fig. 3). For benthic cephalopods, Norway lobster, zooplankton feeding shrimps, bivalves and echinoderms it was not possible to obtain a stable biomass, but the groups were kept from going  
315 extinct (Fig. 3). Benthic cephalopods and Norway lobster had upward trends, whilst zooplankton feeding shrimps had downward tendency. In the case of echinoderms, the biomass started with an upward trend, turning the trend downward in the last eight years.

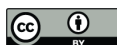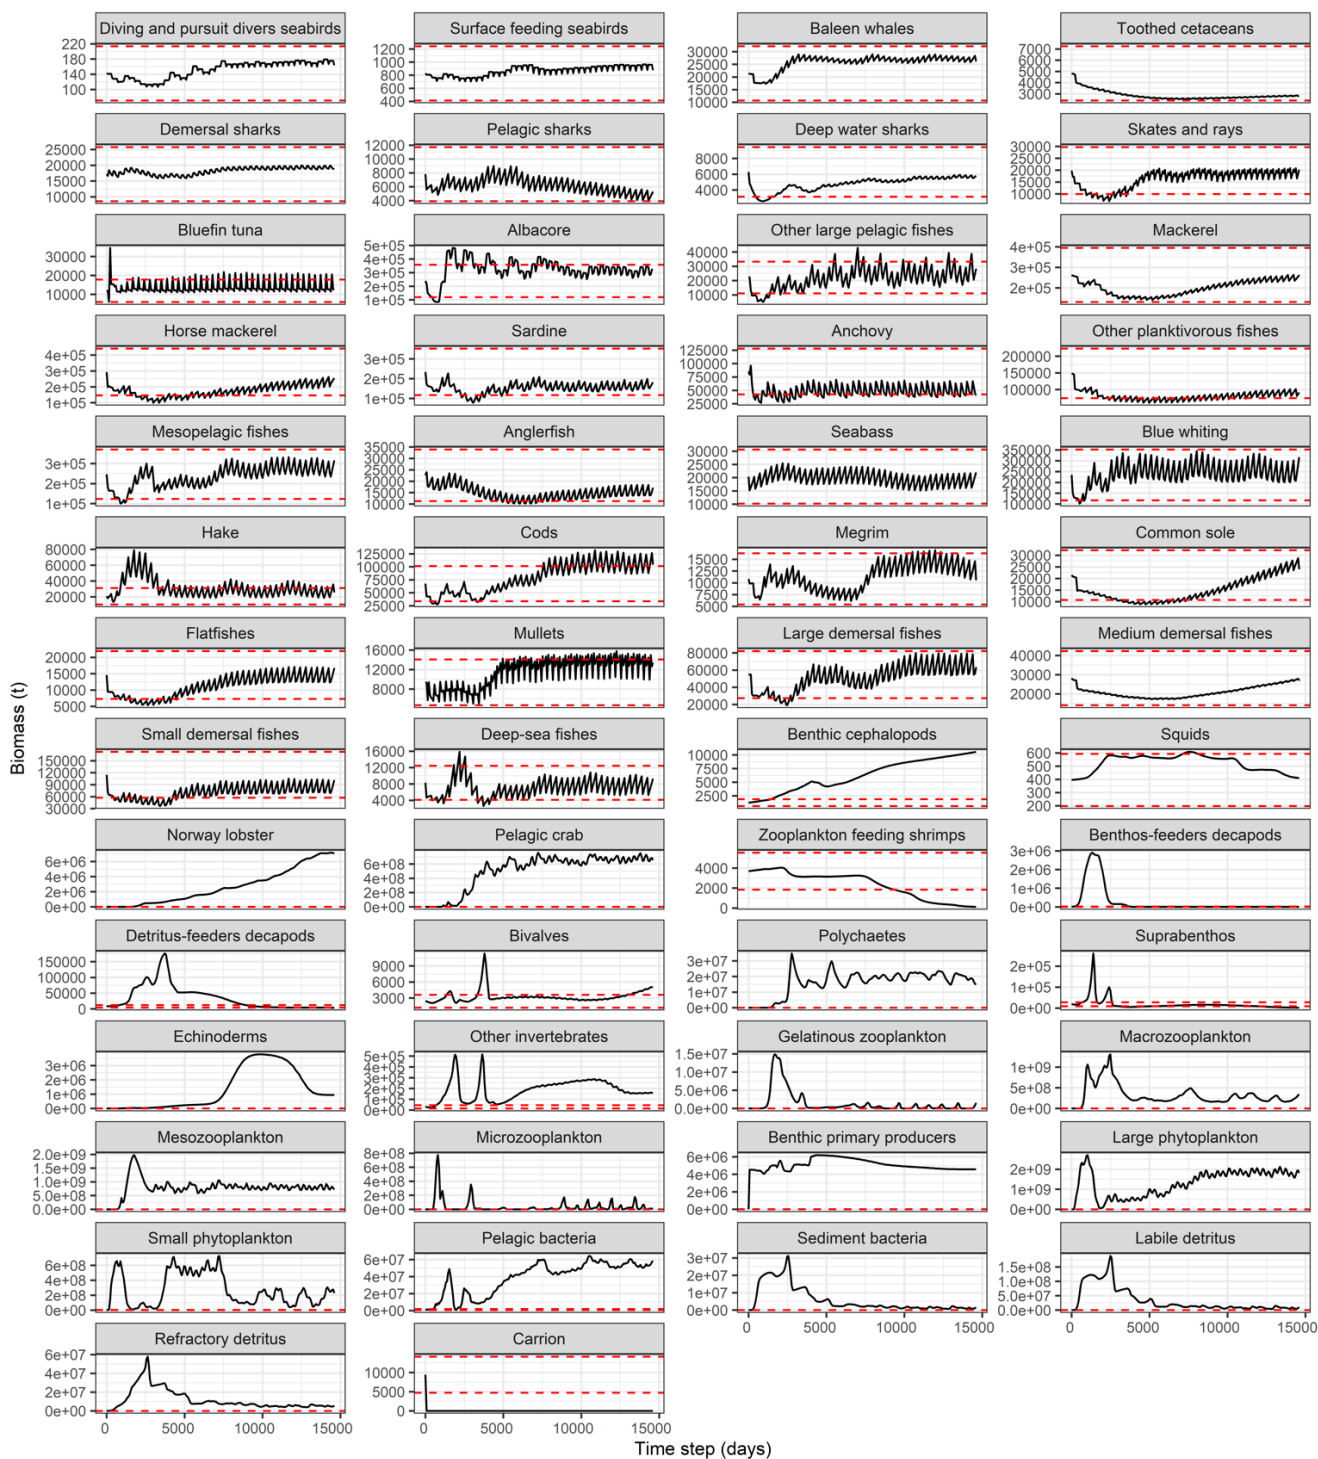

320 **Figure 3.** Time series evolution of the Bay of Biscay Atlantis model groups in the 40-year run. Dashed red line corresponds to the initial biomass value  $\pm 50\%$ .

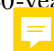



## 3.2. Calibration process

### 3.2.1. NPZD calibration process

In the initial simulation, the macrozooplankton group disappeared completely from the system within the first 15 years and the small phytoplankton had an exponential behaviour instead of a seasonal behaviour (Fig. 4, (b) and (g); marked in dashed line). Considering the computational cost of running a 40-year simulation (approximately 3 hours), and the potential number of runs needed to re-parameterize the unrealistic behaviour in the lower trophic levels, the NPZD calibration process was done with a 15-year simulation (the 40-year final simulation run can be found in Fig. 3).

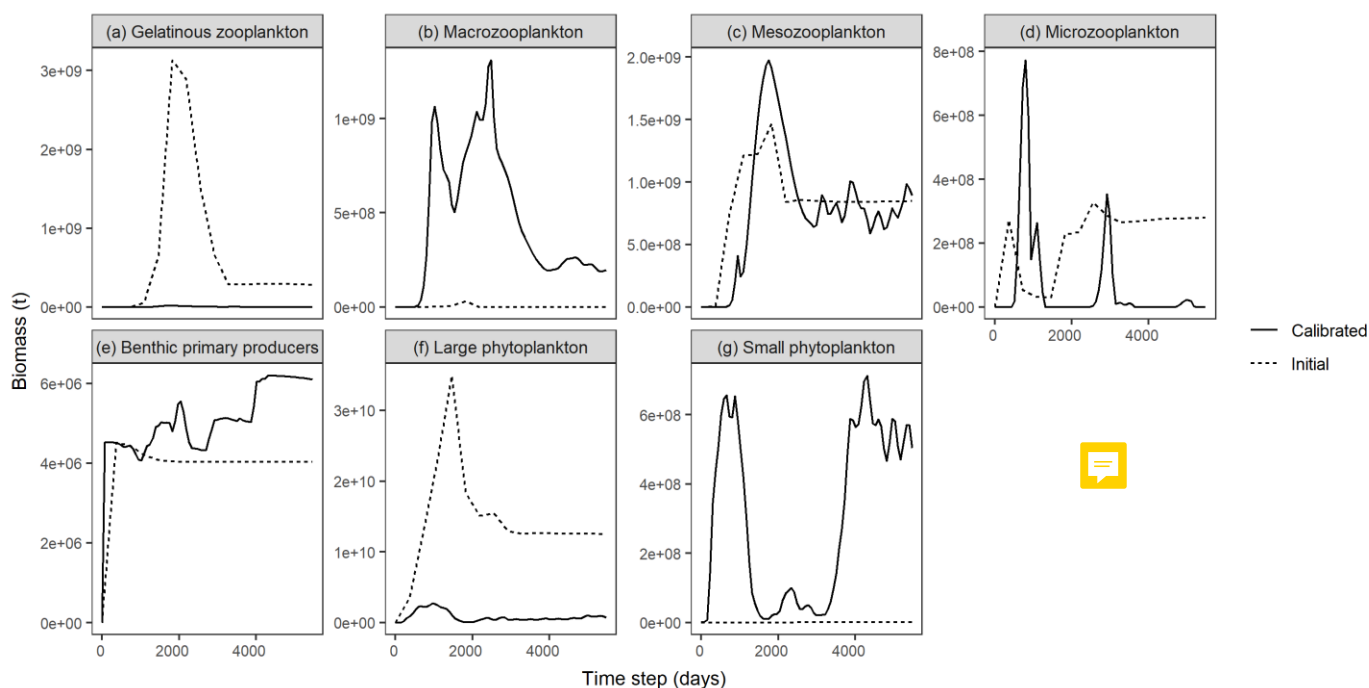

**Figure 4.** Time series evolution of the initial simulation (dashed line) and calibrated simulation (solid line) of the Bay of Biscay Atlantis model NPZD groups in the 15-year run.

In the initial simulations, the sinking rates of phytoplankton were not properly parameterized, thus leading to a build-up of nutrients in the upper layers (Fig. 5; marked  dashed line). In addition, the initial horizontal concentration of  $\text{NO}_3$  and  $\text{NH}_3$  were patchy (results not shown). Therefore,  $\text{NO}_3$  and  $\text{NH}_3$  nutrient values were modified. The new concentration values of  $\text{NH}_3$  and  $\text{NO}_3$  were established based

on the values of the SE-Australian Atlantis model (Fulton et al., 2004)  the NoBa Atlantis model (Hansen et al., 2016).

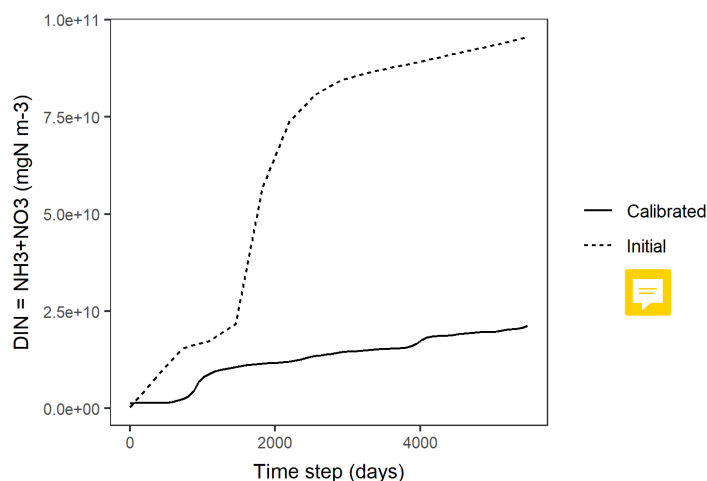

**Figure 5.** Time series evolution of the initial simulation (dashed line) and calibrated simulation (solid line) of the Bay of Biscay Atlantis nutrients in the 15-year run.

The aim of the second step of the NPZD calibration process was first to obtain the seasonal pattern of small phytoplankton, and second, to obtain reasonable biomass limits according to Fulton et al. (2004). To accomplish both objectives, same initial small and large phytoplankton values (in  $\text{mgN m}^{-3}$ ) were set in all polygons and layers. Based on Hansen et al. (2016), a value of  $0.1 \text{ mgN m}^{-3}$  per polygon and layer was used. In the next step, the linear mortality rate for small phytoplankton was added and the diet link between microzooplankton and small phytoplankton decreased from 0.31 to 0.005 to avoid the mismatch between the growth and mortality rates.

Finally, the zooplankton groups were calibrated. During this process we found that the cannibalism and the diet links between macrozooplankton and mesozooplankton groups were strongly related to the zooplankton biomass pattern (results not shown). These links were considerably decreased to avoid the collapse of this groups. In the case of cannibalism, a decrease of  $10^6$  was required for each of the zooplankton group, from 0.01 to  $1 \cdot 10^{-7}$  for gelatinous zooplankton, from 0.03 to  $3 \cdot 10^{-7}$  for macrozooplankton, from 0.02 to  $2 \cdot 10^{-7}$  for mesozooplankton and from 0.02 to  $2 \cdot 10^{-7}$  for microzooplankton. The link between macrozooplankton and mesozooplankton was also decreased, from 0.6 to 0.0006. To ensure that macrozooplankton had enough food to eat, a link with microzooplankton was added to its diet. For gelatinous zooplankton the major changes were decreasing the importance of

large phytoplankton and increasing the importance of small phytoplankton and mesozooplankton in its diet (Fig. 6, (a)-(b)). Regarding macrozooplankton, the cannibalism was reduced whilst small phytoplankton diet proportion was increased (Fig. 6, (c)-(d)). Finally, for mesozooplankton and microzooplankton, the cannibalism was also decreased and the links to detritus groups were increased, resulting in refractory and labile detritus becoming the main prey for mesozooplankton and labile detritus for microzooplankton (Fig. 6, (e)-(h)).

(a) Initial network for gelatinous zooplankton

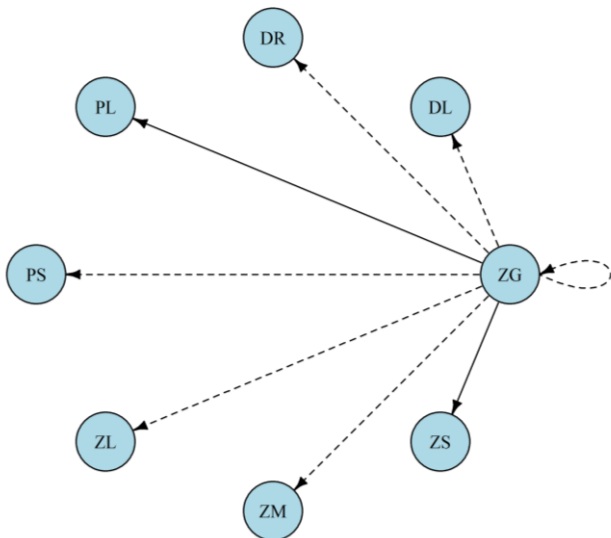

(b) Calibrated network for gelatinous zooplankton

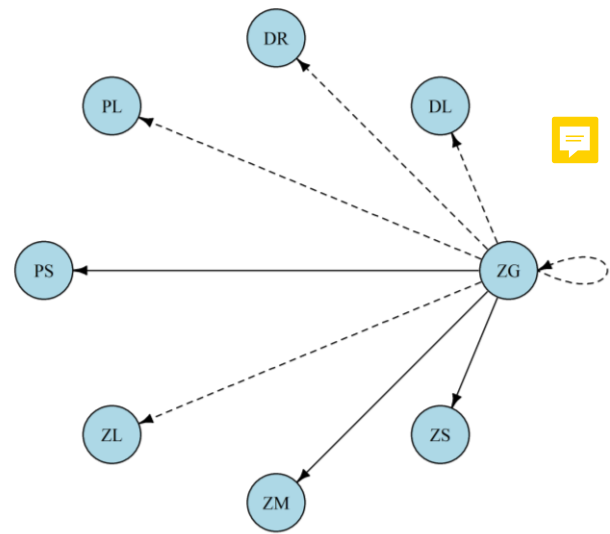

(c) Initial network for macrozooplankton

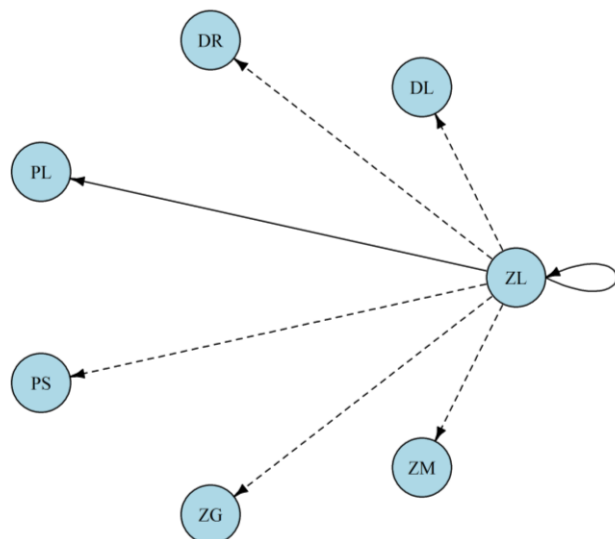

(d) Calibrated network for macrozooplankton

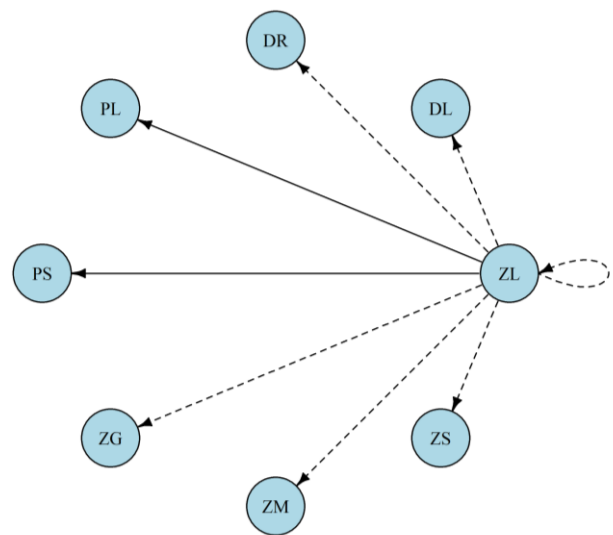

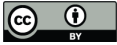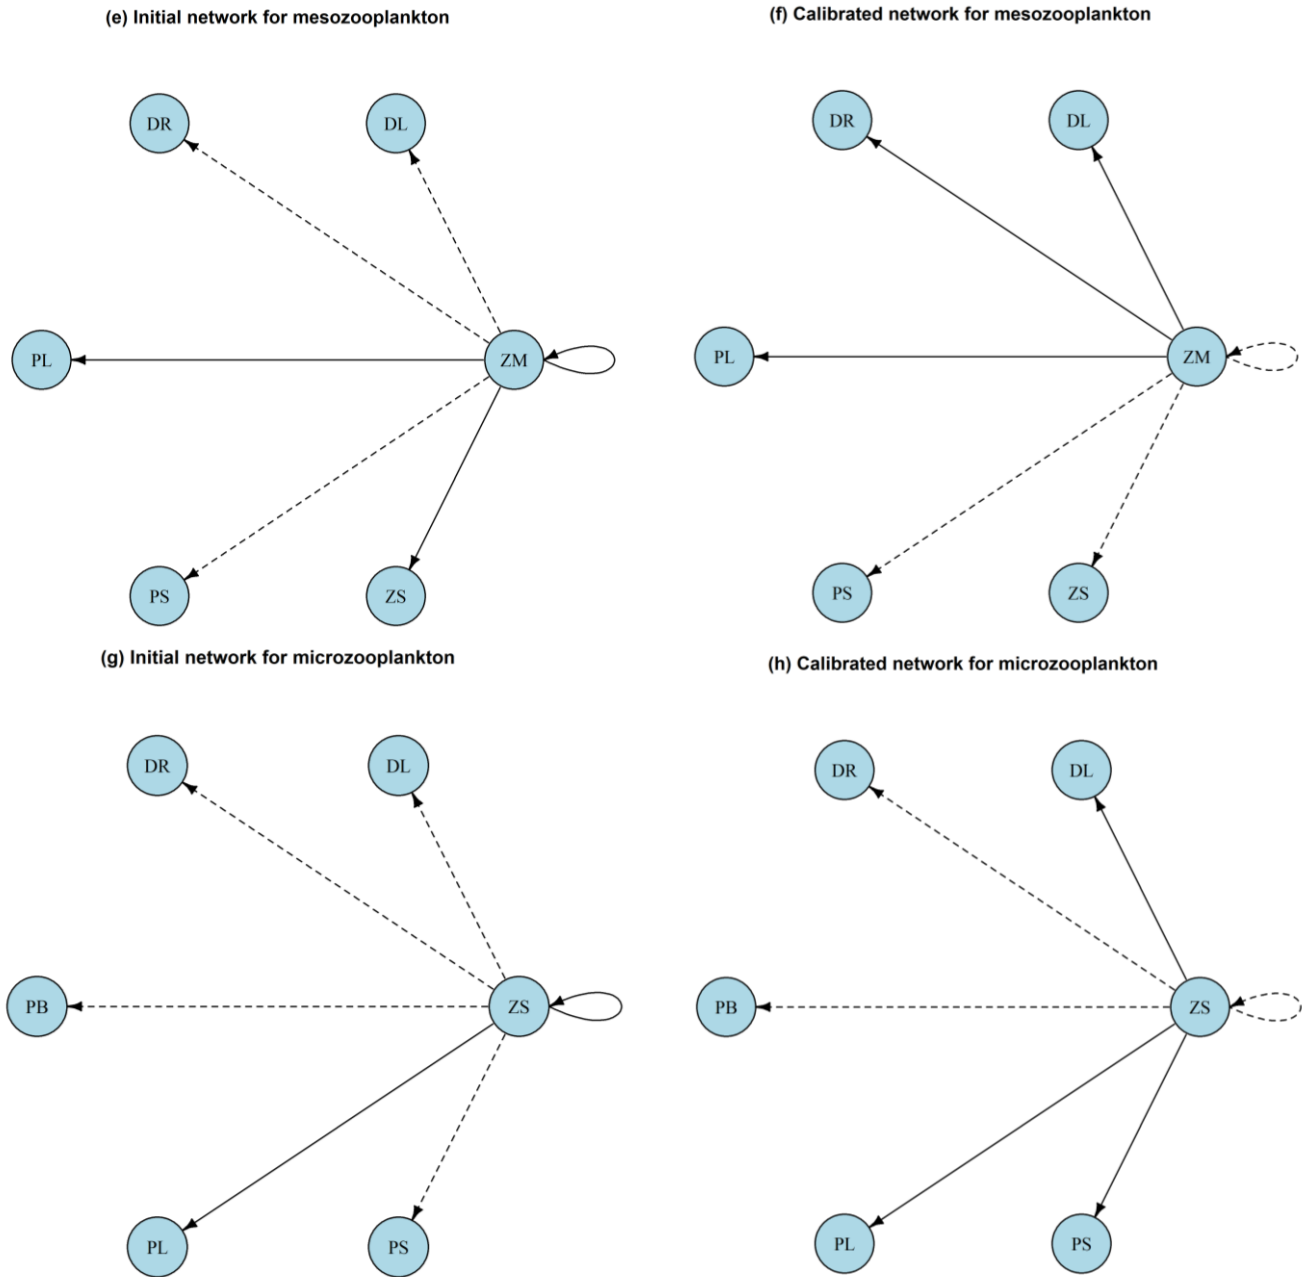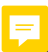

**Figure 6.** Trophic networks showing the mean proportion of the diet of: (a) non-calibrated and (b) calibrated simulation for gelatinous zooplankton; (c) non-calibrated and (d) calibrated simulation for macrozooplankton; (e) non-calibrated and (f) calibrated simulation for mesozooplankton; (g) non-calibrated and (h) calibrated simulation for microzooplankton; of the Bay of Biscay Atlantis model removing the spin-up period. The dashed line represents diet proportion  $< 0.1$ , whilst solid line represents diet proportion  $\geq 0.1$ . Abbreviations: ZG: Gelatinous zooplankton; ZL: Macrozooplankton; ZM: Mesozooplankton; ZS: Microzooplankton; PL: Large phytoplankton; PS: Small phytoplankton; PB: Pelagic bacteria; DL: Labile detritus; DR: Refractory detritus.

400



### 3.2.2. Full system calibration process

Changes in pelagic and benthic invertebrate groups' parameters had a strong impact on all the groups included in the BoB Atlantis model (results not shown). Therefore, we focused the calibration of these groups on keeping them from going extinct (Fig. 3). It is worth mentioning that the cannibalism and the trophic links between the two cephalopod groups had a high impact on the biomass trend of both groups. In the case of squids, a decrease in the cannibalism proportion (from 0.05 to  $5 \cdot 10^{-7}$ ) and the diet proportion between squids and benthic cephalopods (from 0.011 to 0.00011) together with an increase (round up to the next number) in the remaining diet proportions were necessary to avoid the collapse of the group. For benthic cephalopods, the cannibalism proportion value and the diet proportion between benthic and squids were decreased (from 0.0567 to  $5.67 \cdot 10^{-7}$  and from 0.0174 to 0.0002 respectively). For both cephalopod groups the resulting diet was similar comparing with the non-calibrated system considering which prey appear in the diet (results not shown).

As observed throughout the NPZD and the pelagic and benthic invertebrate groups calibration processes, the predator-prey links were also important in the calibration process of the fish groups (Section S5, Table S8), specially for sea bass and mackerel, pointing out an important benthic-pelagic coupling. Sea bass diet proportion values were doubled to avoid the collapse of the population, whereas the diet proportions on adult mackerel were considerably decreased (multiplying by 0.001). For both species, the obtained trophic networks were almost identical. The only difference was the decreasing importance of macrozooplankton in the diet of seabass.

Anchovy and sardine were generally distributed in accordance with observations for 2019 but not very precise for 2020 (Fig. 7). Higher abundances were obtained in the model in the South Coast of France, which corresponds to the highest concentration of eggs from BIOMAN survey in 2019. In addition, the lower biomass values of sardine were predicted in the Spanish coast, which are in line with BIOMAN survey in both years. However, the model was not able to differentiate between low and high biomass values of anchovy in the Spanish coast, mainly for 2020 in the middle area of the Spanish coast



430

where there is a high concentration area of eggs from BIOMAN survey in 2019. This result could be expected due to the seasonal prescribed horizontal movement used for this species.

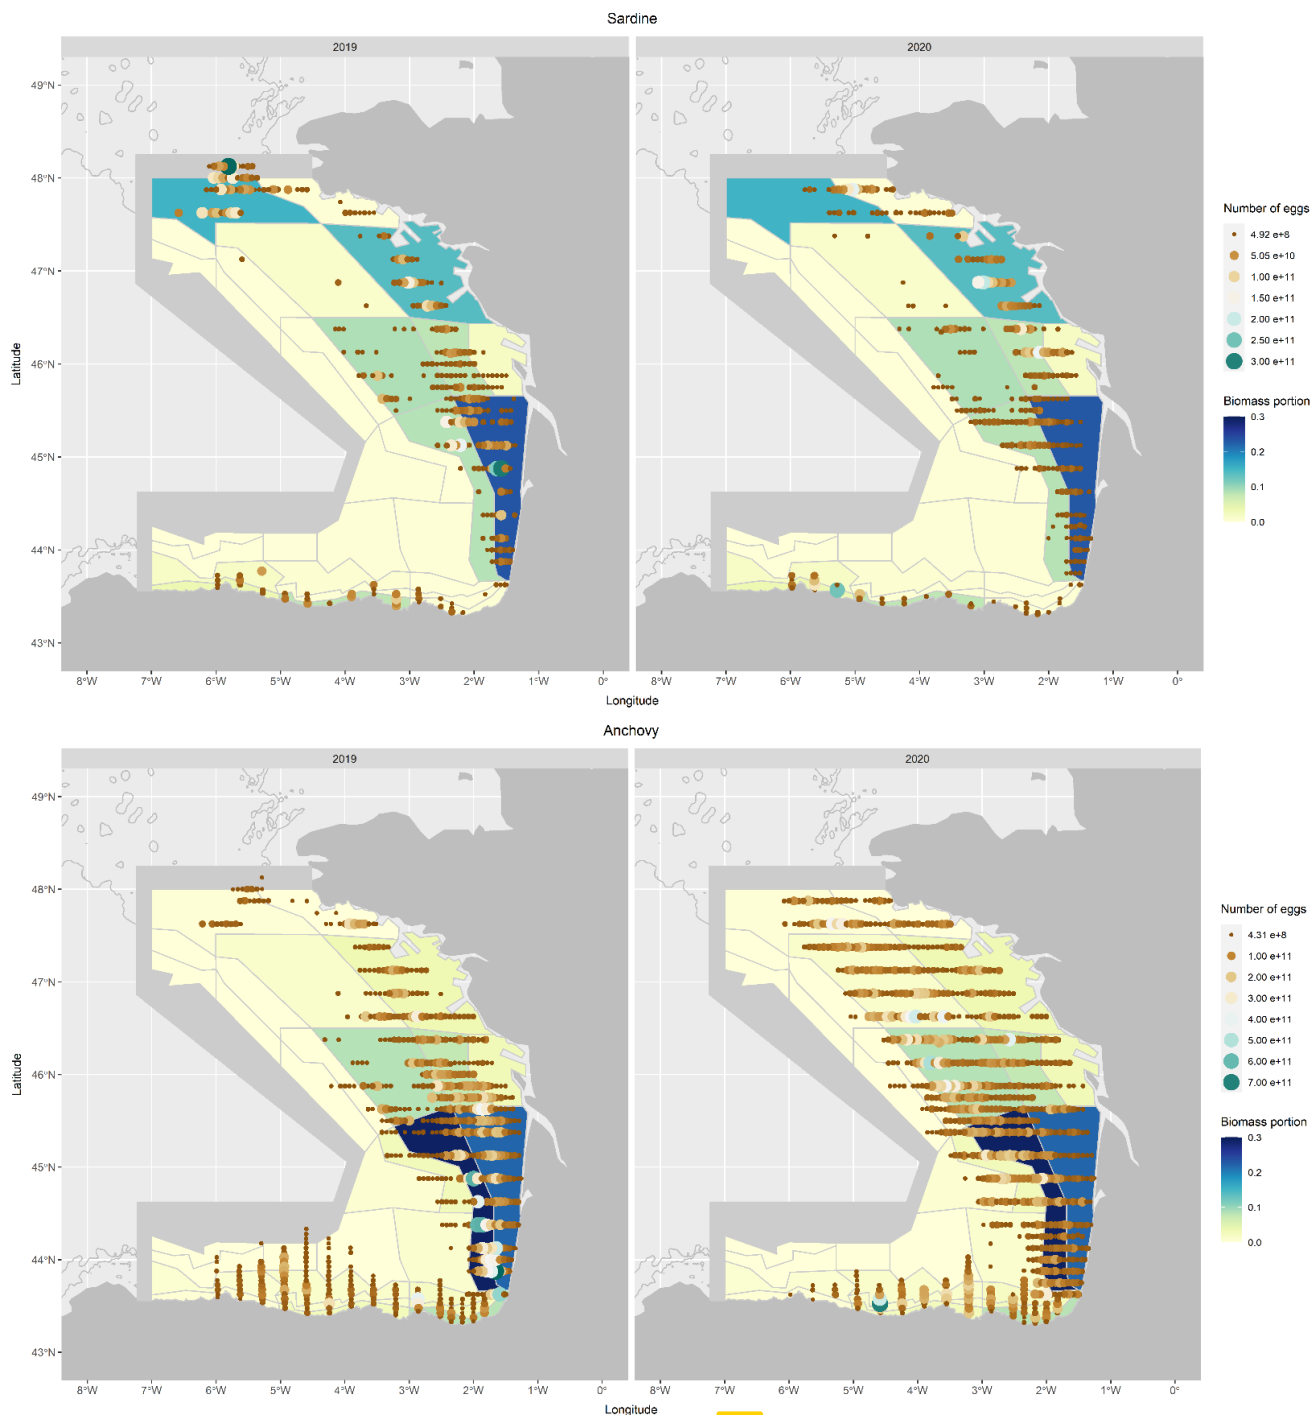

**Figure 7.** Spatial distribution of anchovy and sardine biomasses for  by Atlantis in spring and the egg distribution from BIOMAN survey during Mar for 2019 and 2020.



## 4. Discussion

435 Contrary to other ecosystem models previously developed in the area (Corrales et al., 2022; Lassalle  
et al., 2011; López López, 2017; Moullec et al., 2017; Sánchez and Olaso, 2004), the present study  
characterized spatially the structure and functioning of the whole ecosystem in the BoB using an Atlantis  
model. The Atlantis implementation in the BoB fulfil the objective of simulating a stable and balanced  
ecosystem after the spin-up period. Hence, all functional groups survived throughout the model run with  
440 proper biomass levels in case of pelagic and benthic invertebrates and primary producer functional  
groups. Fish, elasmobranchs, marine mammals and seabird functional groups were within  $\pm 50\%$  of the  
initial values. In addition, there was a reasonable fit between the model distribution and the observed  
spatial distribution of anchovy and sardine in accordance with survey data. Therefore, the present study  
provides a helpful and robust tool for the spatial evaluation of the BoB and for any future ecosystem-  
445 based management of the area.

### 4.1. Ecosystem structural characteristics and trophic interactions

The development of the BoB Atlantis model highlighted the strong trophic interactions between  
benthic-pelagic groups in the system and showed the importance of bottom-up control. In addition, the  
calibration of the BoB Atlantis model showed: i) the influence of primary producers and pelagic and  
450 benthic invertebrate functional groups on the fish species/functional groups; ii) the important role of  
cannibalism in the dynamic of the species; iii) the need of spatiotemporal distribution validation.

The changes on the parameters of primary producers and pelagic and benthic invertebrate functional  
groups during the NPZD and the full-system calibration process to obtain biomass levels within  $\pm 50\%$   
had great impact in the fish species/functional groups, in some cases collapsing the species/functional  
455 groups. For zooplankton and cephalopod groups, we found that the cannibalism was the most important  
characteristic. As stated by Rudolf (2007), the cannibalism is an understudied subject and systematically  
underrepresented in ecosystem models, with the few studies available only focusing on cannibalism in  
higher trophic levels, ignoring that cannibalism also occurs at lower trophic levels and could play an  
important role in the dynamic of species. For zooplankton, seabass and mackerel functional groups where  
460 diet link values were changed during the calibration process, similar trophic networks were obtained  
although with different proportions. These differences could be attributed to the way the diet connection



matrix had to be specified and the way the final realised diet is obtained in Atlantis models. For age-structured groups the four combinations between juvenile and adult must be specified (Audzijonyte et al., 2017). The final realised diet is influenced by the predators' **ga** size limitations and feeding rates, spatiotemporal co-occurrences and in some cases nutritional quality and spawning status. Therefore, the spatial distribution plays an important role in the calculation of the final diet, showing a need for a spatial distribution validation. However, the spatial distribution validation was only possible for anchovy and sardine. In general, the spatial distribution obtained in the model was consistent with egg distribution from BIOMAN survey, but the model showed poor precision for the year 2020 characterizing the areas where higher egg distribution was observed. This could be attributed to intrinsic features of Atlantis (the way spatial distribution is modelled within the approach), settings during model development and how environmental **p**ferences (i.e., temperature and/or salinity) were defined. In Atlantis, there are multiple options for movement for the species. The most common is prescribed movement, while also density dependent movement is frequently used (Audzijonyte et al., 2017). If prescribed movement is used, the spatial distribution will be determined by the user defined proportion of biomass in each polygon for each quarter of the year and for adult and juvenile stages. If density-dependent movement is used, the spatial distribution will be determined by the food availability in different polygons (Audzijonyte et al., 2017). For the BoB Atlantis model prescribed movement was used and the same horizontal distribution was defined for each quarter and adult/juvenile stage. Therefore, differences with survey data were expected as survey data is more specific in time and adult/juvenile stage. In addition, if a species/functional group is sensitive to temperature and/or salinity, its spatial distribution will be affected by the values of these environmental variables in a polygon, and the species/functional group could die if none of the polygon have suitable conditions (Audzijonyte et al., 2017). We therefore suggest exploring spatial distribution and following spatial validation in the studies as the biomass of a species/functional group could vary and the movement of the species/functional group be affected by environmental variables.

#### 4.2. Information gaps identified during model development

The most challenging part of building an Atlantis model is data intensity. Atlantis does not have graphical interface or default model parameters (Audzijonyte et al., 2019), the users must decide the





490 formulation to be applied and provide all the parameters, making assumptions necessary. It should be  
noted that although the most updated and accurate data was used to parameterize the BoB Atlantis model,  
there are still some knowledge gaps and important uncertainty exists. The knowledge gaps are mainly  
related to biomass, spatial distribution, age specific estimates and predator-prey interactions. For pelagic  
sharks, other large pelagic fishes, mesopelagic fishes and zooplankton functional groups biomass  
495 estimates from surveys were not available and, in consequence, information from the EwE model  
developed in the area (Corrales et al., 2022) was used. The EwE model covers a smaller area than BoB  
Atlantis model does, 120 433 km<sup>2</sup> and 145 970 km<sup>2</sup> respectively. Therefore, a higher biomass values for  
these groups should be expected in the BoB Atlantis model. Acoustic and bottom trawl scientific surveys  
used to characterize the spatial distribution of the species/functional groups are carried out in different  
500 seasons (spring and autumn, respectively), which could have important implications on the  
parameterization and characterization of the model as abundance and spatial distribution of  
species/functional groups could vary seasonally (Lloret Lloret et al., 2022; Vilas et al., 2020).  
Additionally, density-dependent movement was neglected when dictating the spatial distribution of  
species/functional groups. The spatial distributions were not related to total biomass trends, the  
505 proportion of the biomass provided was interpolated in each polygon for each quarter of the year  
(Audzijonyte et al., 2017). The surveys or the information found in the literature do not provide age-  
specific biomass, spatial and length-weight data, which makes difficult the parameterization of age-  
structured groups. The more refined the data used in the model, the more tailored the model will be to  
the system. As such, continued data collection and its improvement is critical to increase data availability  
and quality, and, therefore, model accuracy. As new information is being generated, the model could be  
510 updated. But any update/change of a model with refined observations would impact the behaviour of  
species/functional groups, requiring the model to be re-calibrated. Shannon et al. (2020) updated and re-  
fit an existing Ecosim model based on new available data and managed to improve model fits for some  
species and emphasized the importance of species-specific functional response studies. Finally, although  
515 quantitative diet information on stomach content of fish species from IEO database was precise, diet  
information for many organisms (especially for low trophic levels) was scarce. It should be mentioned  
that most of the available stomach content diet information does not consider ontogenic changes in the



diet which, therefore, represent an important limitation to ~~define~~ accurately the four values required for each predator-prey combination.

### 520 4.3. Concluding remarks

In this paper we have introduced the development of the first calibrated end-to-end Atlantis model for the BoB, with the aim of characterizing spatially the structure of the whole ecosystem. The strong trophic interactions between species/functional groups (benthic-pelagic coupling) included in the BoB Atlantis model suggests that the current single species management scheme in the BoB  
525 improved to incorporate ecosystem characteristics, in particular from low trophic level organisms dwelling both the pelagic and benthic systems. In addition, some data limitation ~~was~~ identified during the calibration process which confirms the need for a sensitivity analysis (Bracis et al., 2020; Cariboni et al., 2007; Hansen et al., 2019b; Sturludottir et al., 2018).

Future work should include the introduction of fisheries into the model and ~~the following~~  
530 calibration. This will ~~allow to obtain~~ more realistic biomass values for all species/functional groups included in the BoB Atlantis model enabling us to move towards ecosystem-based fisheries management, and spatially assess the BoB ecosystem.

As a general conclusion, the BoB Atlantis model ~~served~~ not only as a tool for the spatial assessment of the BoB ecosystem, but also ~~to~~ identify data-poor areas which need more information and research.  
535 This was particular the case for spatial distributions of the species/functional groups, diet interactions considering juvenile and adult stages and biomass and biological parameters per age.

### Code availability

Atlantis ecosystem modelling software is free of charge and available for everyone. Due to CSIRO licensing requirements, new users must register to access the code. To register please send an email to  
540 atlantis@csiro.au with your name, institution and one sentence summary about the intended use of the model. This information is required to filter out fake registrations (bots), and to plan future model development and user support. For further details see [https://github.com/ Atlantis-Ecosystem-Model/ Atlantis\\_example\\_and\\_instructions](https://github.com/Atlantis-Ecosystem-Model/Atlantis_example_and_instructions).



## Data availability

545 The datasets generated for this study are available on an official request to the corresponding author.

## Author contribution

ALGZ, XC and EA prepared the data to parameterize the BoB Atlantis model; ALGZ, CH, IQ, XC and EA parameterized the model; ALGZ and CH calibrated the model; ALGZ wrote the original draft of the article; ALGZ, CH, XC, IQ, IP and EA reviewed and edited the manuscript.

## 550 Declaration of competing interest

The authors declare that they have no conflict of interest.

## Acknowledgements

555 The authors would like to acknowledge the scientific researchers from AZTI, IEO and IFREMER for providing information and advice, with special mention to Estanis Mugerza, Maria Santos and Leire Ibaibarriaga. We also address a special thanks to the Atlantis google group and IMR Atlantis group, in special to Beth Fulton, Isaac Kaplan, Hem Nalini Morzaria-Luna and Ina Nielsen. This research was funded by the Basque Government (Department of Economic Development, Sustainability and Environment) and EPELECO project (“Evaluating the pelagic realm from an integrated ecosystem-based perspective in a changing world: insights from the NE Atlantic”- RTI2018-101591-B-I00) founded by 560 the Spanish Government. ALGZ has benefited from a Basque Government scholarship through Economic Development and Infrastructures Department. XC was supported by the Spanish National Program Juan de la Cierva-Formación (MCIN / AEI / 10.13039/501100011033 FJC2020-044367-I) funded by the Government of Spain (Ministry of Science and Innovation (MCIN) and the State Research Agency (AEI)) and the European Union (NextGenerationEU/PRTR).

565



570

## References

- Ainsworth, C. H., Morzaria-Luna, H., Kaplan, I. C., Levin, P. S., Fulton, E. A., Cudney-Bueno, R., Turk-Boyer, P., Torre, J., Danemann, G. D., and Pfister, T.: Effective ecosystem-based management must encourage regulatory compliance: A Gulf of California case study, *Marine Policy*, 36, 1275-1283, <https://doi.org/10.1016/j.marpol.2012.03.016>, 2012.
- Ainsworth, C. H., Paris, C. B., Perlin, N., Dornberger, L. N., Patterson, W. F., III, Chancellor, E., Murawski, S., Hollander, D., Daly, K., Romero, I. C., Coleman, F., and Perryman, H.: Impacts of the Deepwater Horizon oil spill evaluated using an end-to-end ecosystem model, *PloS one*, 13, e0190840, 10.1371/journal.pone.0190840, 2018.
- Audzijonyte, A., Gorton, R., Kaplan, I., and Fulton, E. A.: Atlantis User's Guide Part I: General Overview, *Physics and Ecology*, 2017.
- Audzijonyte, A., Pethybridge, H., Porobic, J., Gorton, R., Kaplan, I., and Fulton, E. A.: Atlantis: A spatially explicit end-to-end marine ecosystem model with dynamically integrated physics, ecology and socio-economic modules, *Methods in Ecology and Evolution*, 2019.
- Aznar, R., Sotillo, M. G., Cailleau, S., Lorente, P., Levier, B., Amo-Baladrón, A., Reffray, G., and Álvarez-Fanjul, E.: Strengths and weaknesses of the CMEMS forecasted and reanalyzed solutions for the Iberia–Biscay–Ireland (IBI) waters, *Journal of Marine Systems*, 159, 1-14, <https://doi.org/10.1016/j.jmarsys.2016.02.007>, 2016.
- Baudron, A. R., Brunel, T., Blanchet, M.-A., Hidalgo, M., Chust, G., Brown, E. J., Kleisner, K. M., Millar, C., MacKenzie, B. R., Nikolioudakis, N., Fernandes, J. A., and Fernandes, P. G.: Changing fish distributions challenge the effective management of European fisheries, *Ecography*, 43, 494-505, <https://doi.org/10.1111/ecog.04864>, 2020.
- Borja, A., Amouroux, D., Anschutz, P., Gómez-Gesteira, M., Uyarra, M. C., and Valdés, L.: Chapter 5 - The Bay of Biscay, in: *World Seas: an Environmental Evaluation (Second Edition)*, Second Edition ed., edited by: Shepard, C., Academic Press, 113-152, <https://doi.org/10.1016/B978-0-12-805068-2.00006-1>, 2019.
- Bossier, S., Nielsen, J. R., Almroth-Rosell, E., Höglund, A., Bastardie, F., Neuenfeldt, S., Wählström, I., and Christensen, A.: Integrated ecosystem impacts of climate change and eutrophication on main Baltic fishery resources, *Ecological Modelling*, 453, 109609, <https://doi.org/10.1016/j.ecolmodel.2021.109609>, 2021.
- Boyra, G., Martinez, U., Cotano, U., Santos, M., Irigoien, X., and Uriarte, A.: Acoustic surveys for juvenile anchovy in the Bay of Biscay: abundance estimate as an indicator of the next year's recruitment and spatial distribution patterns, *ICES Journal of Marine Science*, 70, 1354-1368, 2013.
- Bracis, C., Lehuta, S., Savina-Rolland, M., Travers-Trolet, M., and Girardin, R.: Improving confidence in complex ecosystem models: The sensitivity analysis of an Atlantis ecosystem model, *Ecological Modelling*, 431, 109133, <https://doi.org/10.1016/j.ecolmodel.2020.109133>, 2020.
- Cariboni, J., Gatelli, D., Liska, R., and Saltelli, A.: The role of sensitivity analysis in ecological modelling, *Ecological Modelling*, 203, 167-182, <https://doi.org/10.1016/j.ecolmodel.2005.10.045>, 2007.



- 610 Condie, S. A., Hayes, D., Fulton, E. A., and Savina, M.: Modelling ecological change over half a century  
in a subtropical estuary: impacts of climate change, land-use, urbanization and freshwater extraction,  
Marine Ecology Progress Series, 457, 43-66, 2012.
- Corrales, X., Preciado, I., Gascuel, D., Lopez de Gamiz-Zearra, A., Hernvann, P. Y., Mugerza, E.,  
Louzao, M., Velasco, F., Doray, M., López-López, L., Carrera, P., Cotano, U., and Andonegi, E.:  
615 Structure and functioning of the Bay of Biscay ecosystem: A trophic modelling approach, Estuarine,  
Coastal and Shelf Science, 264, 107658, <https://doi.org/10.1016/j.ecss.2021.107658>, 2022.
- EEA: Natura 2000 (vector) - version 2018, Apr. 2019 [dataset],  
<https://sdi.eea.europa.eu/catalogue/srv/api/records/399dab02-a09c-42cc-bbed-98b1c621157e>, Date  
620 Published.
- Fay, G., Link, J. S., and Hare, J. A.: Assessing the effects of ocean acidification in the Northeast US  
using an end-to-end marine ecosystem model, Ecological Modelling, 347, 1-10,  
10.1016/j.ecolmodel.2016.12.016, 2017.
- Fulton, E. A., Smith, A. D. M., and Smith, D. C.: Alternative Management Strategies for Southeast  
Australian Commonwealth Fisheries: Stage 2: Quantitative Management Strategy Evaluation, 2007.
- 625 Fulton, E. A., Fuller, M., Smith, A. D. M., and Punt, A.: Ecological Indicators of the Ecosystem Effects  
of Fishing: Final Report, 2004.
- Fulton, E. A., Smith, A. D. M., Smith, D. C., and Johnson, P.: An Integrated Approach Is Needed for  
Ecosystem Based Fisheries Management: Insights from Ecosystem-Level Management Strategy  
Evaluation, 10.1371/journal.pone.0084242.g001  
630 10.1371/journal.pone.0084242.t001, 2014.
- Fulton, E. A., Link, J. S., Kaplan, I. C., Savina-Rolland, M., Johnson, P., Ainsworth, C., Horne, P.,  
Gorton, R., Gamble, R. J., Smith, A. D. M., and Smith, D. C.: Lessons in modelling and management  
of marine ecosystems: the Atlantis experience, Fish and Fisheries, 12, 171-188, 10.1111/j.1467-  
2979.2011.00412.x, 2011.
- 635 García-Barón, I., Authier, M., Caballero, A., Vázquez, J. A., Santos, M. B., Murcia, J. L., and Louzao,  
M.: Modelling the spatial abundance of a migratory predator: A call for transboundary marine protected  
areas, Diversity and Distributions, 25, 346-360, <https://doi.org/10.1111/ddi.12877>, 2019a.
- García-Barón, I., Santos, M. B., Uriarte, A., Inchausti, J. I., Escribano, J. M., Albisu, J., Fayos, M., Pis-  
Millán, J. A., Oleaga, Á., Alonso Mier, F. E., Hernández, O., Moreno, O., and Louzao, M.: Which are  
640 the main threats affecting the marine megafauna in the Bay of Biscay?, Continental Shelf Research,  
186, 1-12, <https://doi.org/10.1016/j.csr.2019.07.009>, 2019b.
- Griffith, G. P., Fulton, E. A., Gorton, R., and Richardson, A. J.: Predicting Interactions among Fishing,  
Ocean Warming, and Ocean Acidification in a Marine System with Whole-Ecosystem Models,  
Conservation Biology, 26, 1145-1152, <https://doi.org/10.1111/j.1523-1739.2012.01937.x>, 2012.
- 645 Halpern, B. S., Walbridge, S., Selkoe, K. A., Kappel, C. V., Micheli, F., D'Agrosa, C., Bruno, J. F.,  
Casey, K. S., Ebert, C., and Fox, H. E.: A global map of human impact on marine ecosystems, Science,  
319, 948-952, 2008.
- Hansen, C., Nash, R. D. M., Drinkwater, K. F., and Hjøllø, S. S.: Management Scenarios Under Climate  
Change – A Study of the Nordic and Barents Seas, Frontiers in Marine Science, 6,  
650 10.3389/fmars.2019.00668, 2019a.
- Hansen, C., Skern-Mauritzen, M., Meeren, G. I. v. d., Jähkel, A., and Drinkwater, K.: Set-up of the  
Nordic and Barents Seas (NoBa) Atlantis model, 2016.



- Hansen, C., Drinkwater, K. F., Jähkel, A., Fulton, E. A., Gorton, R., and Skern-Mauritzen, M.: Sensitivity of the Norwegian and Barents Sea Atlantis end-to-end ecosystem model to parameter perturbations of key species, *PloS one*, 14, e0210419, 10.1371/journal.pone.0210419, 2019b.
- 655 ICCAT: Report of the 2016 ICCAT North and South Atlantic albacore stock assessment meeting. Madeira, April 28 to May 6, 2016.
- ICCAT: Report of the 2017 ICCAT Bluefin Stock Assessment meeting. Madrid, 20-28 July, 2017.
- 660 ICES: ICES Statistical Areas, ICES Metadata Catalogue [data set], <https://gis.ices.dk/geonetwork/srv/eng/catalog.search#/metadata/c784a0a3-752f-4b50-b02f-f225f6c815eb>.
- ICES: ICES Phytoplankton and Microbial Plankton Status Report 2009/2010 ICES Cooperative Research Report No. 313, 196 pp., <https://doi.org/10.17895/ices.pub.5407>, 2012.
- ICES: Manual of the IBTS North Eastern Atlantic Surveys, 92, 2017.
- 665 ICES: Bay of Biscay and the Iberian Coast ecoregion – Ecosystem overview, In Report of the ICES Advisory Committee, 2019. ICES Advice 2019, Section 6.1, <https://doi.org/10.17895/ices.advice.5751>, 2019a.
- ICES: SISP 6 - Manual for mackerel and horse mackerel egg surveys, sampling at sea. Series of ICES Survey Protocols (2012–2020), <https://doi.org/10.17895/ices.pub.5140> 2019b.
- 670 ICES: Anchovy (*Engraulis encrasicolus*) in Subarea 8 (Bay of Biscay). In Report of the ICES Advisory Committee, 2019. ICES Advice 2019, ane.27.8, <https://doi.org/10.17895/ices.advice.5544>, 2019c.
- Kaplan, I. C. and Marshall, K. N.: A guinea pig's tale: learning to review end-to-end marine ecosystem models for management applications, *ICES Journal of Marine Science: Journal du Conseil*, 73, 1715-1724, 10.1093/icesjms/fsw047, 2016.
- 675 Laran, S., Authier, M., Blanck, A., Doremus, G., Falchetto, H., Monestiez, P., Pettex, E., Stephan, E., Van Canneyt, O., and Ridoux, V.: Seasonal distribution and abundance of cetaceans within French waters- Part II: The Bay of Biscay and the English Channel, *Deep Sea Research Part II: Topical Studies in Oceanography*, 141, 31-40, <https://doi.org/10.1016/j.dsr2.2016.12.012>, 2017.
- Lassalle, G., Lobry, J., Le Loc'h, F., Bustamante, P., Certain, G., Delmas, D., Dupuy, C., Hily, C., Labry, C., Le Pape, O., Marquis, E., Petitgas, P., Pusineri, C., Ridoux, V., Spitz, J., and Niquil, N.: Lower trophic levels and detrital biomass control the Bay of Biscay continental shelf food web: Implications for ecosystem management, *Progress in Oceanography*, 91, 561-575, 10.1016/j.pocean.2011.09.002, 2011.
- 685 Lavin, A., Valdés, L., Sanchez, F., Abaunza, P., Forest, A., Boucher, J., and Jegou, A.: The Bay of Biscay: the encountering of the Ocean and the Shelf (18b, E), *The Sea, Ideas and Observations on Progress in the Study of the Seas: The global coastal ocean, interdisciplinary regional studies and syntheses. The coasts of Africa, Europe, Middle East, Oceania and Polar regions*, 14, 935, 2006.
- Link, J. S., Fulton, E. A., and Gamble, R. J.: The northeast US application of ATLANTIS: A full system model exploring marine ecosystem dynamics in a living marine resource management context, *Progress in Oceanography*, 87, 214-234, 10.1016/j.pocean.2010.09.020, 2010.
- 690 Lloret Lloret, E., Christensen, V., Steenbeek, J., Pennino, M. G., Navarro, J., and Coll, M.: Effects of Seasonality on the Structure and Functioning of a Mediterranean Sea Ecosystem., 2022.
- López López, L.: Trophic structure and functioning of the marine food webs on the North-Atlantic continental shelf of the Iberian peninsula: implications of the benthic-pelagic coupling, *Departamento de Biología de Organismos y Sistemas, Universidad de Oviedo*, 2017.
- 695



- Lorance, P., Bertrand, J. A., Brind'Amour, A., Rochet, M.-J., and Trenkel, V. M.: Assessment of impacts from human activities on ecosystem components in the Bay of Biscay in the early 1990s, *Aquatic Living Resources*, 22, 409-431, 10.1051/alr/2009049, 2010.
- Masse, J., Uriarte, A., Angélico, M., and Carrera, P.: Pelagic survey series for sardine and anchovy in ICES subareas 8 and 9—Towards an ecosystem approach 1017-6195, 2018.
- Morzaria-Luna, H. N., Ainsworth, C. H., Tarnecki, J. H., and Grüss, A.: Diet composition uncertainty determines impacts on fisheries following an oil spill, *Ecosystem services*, 33, 187-198, <https://doi.org/10.1016/j.ecoser.2018.05.002>, 2018.
- Moullec, F., Gascuel, D., Bentorcha, K., Guénette, S., and Robert, M.: Trophic models: What do we learn about Celtic Sea and Bay of Biscay ecosystems?, *Journal of Marine Systems*, 172, 104-117, 10.1016/j.jmarsys.2017.03.008, 2017.
- Ortega-Cisneros, K., Cochran, K. L., Fulton, E. A., Gorton, R., and Popova, E.: Evaluating the effects of climate change in the southern Benguela upwelling system using the Atlantis modelling framework, *Fisheries Oceanography*, 27, 489-503, <https://doi.org/10.1111/fog.12268>, 2018.
- OSPAR: Quality Status Report 2000: Region IV – Bay of Biscay and Iberian Coast. OSPAR Commission, London. 134 + xiii pp., 2000.
- Perry, A. L., Low, P. J., Ellis, J. R., and Reynolds, J. D.: Climate Change and Distribution Shifts in Marine Fishes, *Science*, 308, 1912-1915, doi:10.1126/science.1111322, 2005.
- Pethybridge, H. R., Weijerman, M., Perryman, H., Audzijonyte, A., Porobic, J., McGregor, V., Girardin, R., Bulman, C., Ortega-Cisneros, K., Sinerchia, M., Hutton, T., Lozano-Montes, H., Mori, M., Novaglio, C., Fay, G., Gorton, R., and Fulton, E.: Calibrating process-based marine ecosystem models: An example case using Atlantis, *Ecological Modelling*, 412, 108822, <https://doi.org/10.1016/j.ecolmodel.2019.108822>, 2019.
- Pettex, E., Laran, S., Authier, M., Blanck, A., Dorémus, G., Falchetto, H., Lambert, C., Monestiez, P., Stéfan, E., Van Canneyt, O., and Ridoux, V.: Using large scale surveys to investigate seasonal variations in seabird distribution and abundance. Part II: The Bay of Biscay and the English Channel, *Deep Sea Research Part II: Topical Studies in Oceanography*, 141, 86-101, 10.1016/j.dsr2.2016.11.012, 2017.
- Plagányi, É. E.: Models for an ecosystem approach to fisheries, 2007.
- R Core Team: R: A Language and Environment for Statistical Computing. R Foundation for Statistical Computing, Vienna, Austria [code], 2021.
- Ramos, J., Soma, K., Bergh, Ø., Schulze, T., Gimpel, A., Stelzenmüller, V., Mäkinen, T., Fabi, G., Grati, F., and Gault, J.: Multiple interests across European coastal waters: the importance of a common language, *ICES Journal of Marine Science*, 72, 720-731, 2015.
- Redfield, A. C.: The biological control of chemical factors in the environment, *American scientist*, 46, 230A-221, 1958.
- Rudolf, V. H. W.: THE INTERACTION OF CANNIBALISM AND OMNIVORY: CONSEQUENCES FOR COMMUNITY DYNAMICS, *Ecology*, 88, 2697-2705, <https://doi.org/10.1890/06-1266.1>, 2007.
- Sánchez, F. and Olaso, I.: Effects of fisheries on the Cantabrian Sea shelf ecosystem, *Ecological Modelling*, 172, 151-174, <https://doi.org/10.1016/j.ecolmodel.2003.09.005>, 2004.
- Schreiber, E. S. G., Bearlin, A. R., Nicol, S. J., and Todd, C. R.: Adaptive management: a synthesis of current understanding and effective application, *Ecological Management & Restoration*, 5, 177-182, 2004.



740 Serrano, A., Sánchez, F., and García-Castrillo, G.: Epibenthic communities of trawlable grounds of the Cantabrian Sea, *Scientia Marina*, 70, 149-159, 10.3989/scimar.2006.70s1149, 2006.

Shannon, L. J., Ortega-Cisneros, K., Lamont, T., Winker, H., Crawford, R., Jarre, A., and Coll, M.: Exploring temporal variability in the southern Benguela ecosystem over the past four decades using a time-dynamic ecosystem model, *Frontiers in Marine Science*, 7, 540, 2020.

745 Sturludottir, E., Desjardins, C., Elvarsson, B., Fulton, E. A., Gorton, R., Logemann, K., and Stefansson, G.: End-to-end model of Icelandic waters using the Atlantis framework: Exploring system dynamics and model reliability, *Fisheries Research*, 207, 9-24, 10.1016/j.fishres.2018.05.026, 2018.

Valdés, L. and Lavín, A.: 10 Dynamics and human impact in the bay of biscay: An ecological perspective, in: *Large Marine Ecosystems*, edited by: Sherman, K., and Skjoldal, H. R., Elsevier, 293-320, [https://doi.org/10.1016/S1570-0461\(02\)80062-3](https://doi.org/10.1016/S1570-0461(02)80062-3), 2002.

750 Vasquez, M., Allen, H., Manca, E., Castle, L., Lillis, H., Agnesi, S., Al Hamdani, Z., Annunziatellis, A., Askew, N., Bekkby, T., Bentes, L., Doncheva, V., Drakopoulou, V., Duncan, G., Gonçalves, J., Inghilesi, R., Laamanen, L., Loukaidi, V., Martin, S., McGrath, F., Mo, G., Monteiro, P., Muresan, M., Nikilova, C., O'Keefe, E., Pesch, R., Pinder, J., Populus, J., Ridgeway, A., Sakellariou, D., Teaca, A., Tempera, F., Todorova, V., Tunesi, L., and Virtanen, E.: EUSeaMap 2021. A European broad-scale seabed habitat map, EMODnet, 10.13155/83528, 2021.

755 Vilas, D., Pennino, M. G., Bellido, J. M., Navarro, J., Palomera, I., and Coll, M.: Seasonality of spatial patterns of abundance, biomass, and biodiversity in a demersal community of the NW Mediterranean Sea, *ICES Journal of Marine Science*, 77, 567-580, 2020.

760 Worm, B. and Branch, T. A.: The future of fish, *Trends in Ecology & Evolution*, 27, 594-599, <https://doi.org/10.1016/j.tree.2012.07.005>, 2012.
